# Supplementary material for: Integrated Full-Length Transcriptome and MicroRNA Sequencing Approaches Provide Insights Into Salt Tolerance in Mangrove (Sonneratia apetala Buch.-Ham.)
Source: Front Genet. 2022 Jul 11;13:932832. doi: 10.3389/fgene.2022.932832 (PMC9310009; doi:10.3389/fgene.2022.932832)
Supplement: Supplementary file 2 [file Table1.XLSX]

## Sheet: Legends for Supplementary Data
Data S1 Detailed information of known miRNAs that were identified in S. apetala
Data S2 The novel miRNAs identified in S. apetala
Data S3 Differentially expressed miRNAs in S. apetala after salt treatment (P < 0.01, Q < 0.05)
Data S4 The aligned information for miRNA-target pairs pretected by TargetFinder and psRobot.
Data S5 Target prediction and annotation of differentailly expressed miRNAs in S. apetala
Data S6 Differentially expressed Sonneratia-specific miRNAs in genome organization
Data S7 Summary of RNA-seq datasets for nine samples with QC quality
Data S8 Differentially expressed genes for S. apetala in LT1 vs LCK comparison (P < 0.01, Q < 0.05)
Data S9 Differentially expressed genes for S. apetala in LT2 vs LCK comparison (P < 0.01, Q < 0.05)
Data S10 Co-expressed Sonneratia-specific miRNA-target interactions under salt condition
Data S11 Information of the sigificantly enriched GO terms for target genes from the co-expressed miRNA-target pairs (P < 0.05, Q < 0.1)
Data S12 List of pathway of targets within co-expressed miRNA-target interactions (P < 0.05, Q < 0.1)

## Sheet: Data S1
Family	miRNA name	Reference miRNA	miRNA sequence (5'-3')	Length(nt)	Pre-miRNA sequence	End pos (mature on hairpin)	miRNA reads									Normalizated read count (TPM)
							LCK_a	LCK_b	LCK_c	LT1_a	LT1_b	LT1_c	LT2_a	LT2_b	LT2_c	LCK_a	LCK_b	LCK_c	LT1_a	LT1_b	LT1_c	LT2_a	LT2_b	LT2_c
MIR156	Sap-miR156_1	bgy-miR156,bcy-miR156	UUUGACAGAAGAUAGAGAGCAC	22	UUCCAAGAAAACCCAAAGCCCCAGGUAAAUGUGGGGAAAGAAAUCUCCUCAUCUCAAUCUCCAUCUCUCGCUCGUUCUCUCUGCAUAUCCCUCUGACUGAUCUCUGCCAAAUACAGCAACUUUCCUAUUUAUAACCUCCUUUUGUUAUCUCUAAUCAGACACAUAAGAGCAGGAUUAAAUAGAGCAGGGUUAUGGCAGGCUUGCAGGGAUGAGAGAAAAUGAUAUUGAUGGACUUUGAUGGCCAGGGGUUUUGACAGAAGAUAGAGAGCACAGAUGGAGAUUUGCAACAGUUGAUAAGAU	271	60156	14	64214	69700	62103	59143	4	73418	64440	40525	14	42561	44901	41793	39933	4	46899	42804
	Sap-miR156_2	hbr-miR156	UUGACAGAAGAUAGAGAGC	19	AAUCUCCAUCUCUCGCUCGUUCUCUCUGCAUAUCCCUCUGACUGAUCUCUGCCAAAUACAGCAACUUUCCUAUUUAUAACCUCCUUUUGUUAUCUCUAAUCAGACACAUAAGAGCAGGAUUAAAUAGAGCAGGGUUAUGGCAGGCUUGCAGGGAUGAGAGAAAAUGAUAUUGAUGGACUUUGAUGGUCAGGGGUUUUGACAGAAGAUAGAGAGCACAGAUGGAGAUUUGCAACAGUUGAUAAGAUCUUUGGUCUCUCACCACCGCCCGCUACCACCGCCACCGCCACCGCCCCCGCCCGC	214	1	0	0	2	0	0	1	2	0	1	0.001	0.001	2	0.001	0.001	1	2	0.001
	Sap-miR156a	bna-miR156a,rco-miR156a,rco-miR156b,rco-miR156c,rco-miR156d,hvu-miR156a,tae-miR156,ssp-miR156,ssl-miR156,hvu-miR156b	UGACAGAAGAGAGUGAGCACA	21	UGACAGAAGAGAGUGAGCACACAGAGGGACAAUUGUAUAAAGGCGCUAUACCUUUGCUUUUGUGUGCUCACUGCUCUUUCUGUCAGAUUCCCCGUGCUGCAACCCGAUGAGAAAUUCUCGAGCACGGGCUCGAUGCAUGUGGUCGACUUACUUCCAUCCAUGGCCUUUCUGAUGGGUGAUUGUGUCUUUGAUCUAAAGAGACGAGCUCGGAUGGGAGCGUGACUUUUCAUGAAUAUAUGUUGGACGAUUUCUAAUAUUGUGAGGAUUUAAUGGUAAAAUUUUCUGGUUUCACGGGGCCAU	21	199	85	173	300	419	35	218	347	341	199	85	173	299	417	35	218	347	341
	Sap-miR156a-3p	ath-miR156a-3p,aly-miR156a-3p	GCUCACUGCUCUUUCUGUCAGA	22	CUGCUUGUGGGAAGUACCUUUCCCUUUUCGUGGUCCUCCAUUCACAUUAUCACAUUUUUGUGUGGUCUAUGUUGUUUCCUUUUAAGGUAAAGUUCAUGUGUAUUCCAUUCCCCCCUUUUUUCUUCUUCUUUCUUAUUGAUUUUUUUUCUCUUGUUCAUCAUUUGGAGGUGGGCAAUGGAGAAAUUGACAGAAGAGAGUGAGCACACAGAGGGACAAUUGUAUAAAGGCGCUAUACCUUUGCUUUUGUGUGCUCACUGCUCUUUCUGUCAGAUUCCCCGUGCUGCAACCCGAUGAGAAAUU	271	0	0	0	0	0	0	0	1	0	0.001	0.001	0.001	0.001	0.001	0.001	0.001	1	0.001
	Sap-miR156a-5p	ath-miR156a-5p,ath-miR156b-5p,ath-miR156c-5p,ath-miR156d-5p,ath-miR156e,ath-miR156f-5p,osa-miR156a,osa-miR156b-5p,osa-miR156c-5p,osa-miR156d,osa-miR156e,osa-miR156f-5p,osa-miR156g-5p,osa-miR156h-5p,osa-miR156i,osa-miR156j-5p,zma-miR156d-5p,zma-miR156f-5p,zma-miR156g-5p,zma-miR156b-5p,zma-miR156c,zma-miR156e-5p,zma-miR156a-5p,zma-miR156h-5p,zma-miR156i-5p,sbi-miR156a,sbi-miR156c,sbi-miR156b,sof-mi…	UGACAGAAGAGAGUGAGCAC	20	UGACAGAAGAGAGUGAGCACACAGAGGGACAAUUGUAUAAAGGCGCUAUACCUUUGCUUUUGUGUGCUCACUGCUCUUUCUGUCAGAUUCCCCGUGCUGCAACCCGAUGAGAAAUUCUCGAGCACGGGCUCGAUGCAUGUGGUCGACUUACUUCCAUCCAUGGCCUUUCUGAUGGGUGAUUGUGUCUUUGAUCUAAAGAGACGAGCUCGGAUGGGAGCGUGACUUUUCAUGAAUAUAUGUUGGACGAUUUCUAAUAUUGUGAGGAUUUAAUGGUAAAAUUUUCUGGUUUCACGGGGCCAU	20	11443	4817	9684	8547	12340	1269	7887	12551	11986	10466	4625	8967	8043	11171	1257	7417	11508	10892
	Sap-miR156f-3p	bra-miR156f-3p	UGCUCACUGCUCUUUCUGUCAGA	23	CUUUUUUUCCAUUGGUGGAAAUUUUUGCUAUUUAAUCACACAUUUUGUUGUGGUCCUUGUCGUUUCCUUUUAAGGUAAAGUUCCGUGGUGGUCCGUCGUUGCCCCCCAAACCUUAUUCCCAUUUCCUUUCCCCCAAAUUUCUCGUGUUAUUCAGGAGGGGGGCAUGGAGGAGAAAUUGGACAGAAGAGAGUGGAGGCAACACAGAGAGGGACAAAACCGUAUAGAGCCGUUAUACCUUUGCUUUUUGCGUGCUCACUGCUCUUUCUGUCAGAUUUUCUUUUUGCCCGCUAUCCAAUGAGA	272	1	1	6	5	4	2	10	4	10	1	1	6	5	4	2	10	4	10
	Sap-miR156g_1	ath-miR156g,smo-miR156a,aly-miR156g-5p	CGACAGAAGAGAGUGAGCAC	20	CGACAGAAGAGAGUGAGCACGCGCAGGCAAUAGUUAUGAGUUGCAUAUCUCUGCAUGUGUGUGCUUACAUCUCUUUCUGUCAGCUCUUCCUCGUAUAUGUCAGAUCAUCGUCAUCAUCAUCCAAGAAUCCAUGUUCUCUCUCCGGUUCCCACUCUAUAGAAUCUUCAGAUUCUUCACAUCUUCUCUCUUCCCUGAACUUUUUUGAUUUUCUGAUGAAAAUACGGGAAGUUCAACCCUGCAGGAAACACUAGAAUGAUUAACAGCUCUCUUAUCAAUGUGUUUCACUGUUACUGCCAUGCA	20	359	167	284	122	187	90	123	127	158	356	167	284	122	185	89	122	127	157
	Sap-miR156g_2	gma-miR156g	ACAGAAGAUAGAGAGCACAG	20	CCCCUAAUCAGUGAGAGACCAAACAAUCCCUCAACCCUCUUCCUUUUUCCUUAUAAAGAAACAUUCCCUUAUCAUGAUCCUCACUUUCUUCACGGUUCAGAGCCCACAGCUAGCCCUUCUCAGAAAACCUCUUCAGCCAAAGCGGGGUUUCAGAAGGACAUAGUGAUCUCUACAUGCAUGAACCAGGAGCCAGUGUUAGAGAGGAGCUAGGGAUUUGAAGAGAGAGGGGCAUACAGUAUGGUGUUGUUGACAGAAGAUAGAGAGCACAGAUGAGGACUUGCUAACCUUUGUGGCAUCUCU	269	14	9	6	12	10	4	4	5	4	14	9	6	12	10	4	4	5	4
	Sap-miR156k	gma-miR156k,gma-miR156n,gma-miR156o	UUGACAGAAGAGAGUGAGCAC	21	UUGACAGAAGAGAGUGAGCACACAGAGGGACAAUUGUAUAAAGGCGCUAUACCUUUGCUUUUGUGUGCUCACUGCUCUUUCUGUCAGAUUCCCCGUGCUGCAACCCGAUGAGAAAUUCUCGAGCACGGGCUCGAUGCAUGUGGUCGACUUACUUCCAUCCAUGGCCUUUCUGAUGGGUGAUUGUGUCUUUGAUCUAAAGAGACGAGCUCGGAUGGGAGCGUGACUUUUCAUGAAUAUAUGUUGGACGAUUUCUAAUAUUGUGAGGAUUUAAUGGUAAAAUUUUCUGGUUUCACGGGGCCA	21	1964	1053	1784	1687	2009	415	1179	1630	1414	1930	1043	1763	1667	1959	412	1170	1607	1391
MIR157	Sap-miR157a-5p	ath-miR157a-5p,ath-miR157b-5p,ath-miR157c-5p,gma-miR156d,gma-miR156c,ptc-miR156g,ptc-miR156h,ptc-miR156i,ptc-miR156j,mtr-miR156e,mtr-miR156f,mtr-miR156h-5p,gra-miR157a,gra-miR157b,bna-miR156b,bna-miR156c,vvi-miR156f,vvi-miR156g,vvi-miR156i,sly-miR156a,sly-miR156b,sly-miR156c,bra-miR157a,bol-miR157a,rco-miR156f,rco-miR156g,rco-miR156h,aly-miR157a-5p,aly-miR157b-5p,aly-miR157c-5p,ahy-miR156b-5p,tcc…	UUGACAGAAGAUAGAGAGCAC	21	UCCAAGAAAACCCAAAGCCCCAGGUAAAUGUGGGGAAAGAAAUCUCCUCAUCUCAAUCUCCAUCUCUCGCUCGUUCUCUCUGCAUAUCCCUCUGACUGAUCUCUGCCAAAUACAGCAACUUUCCUAUUUAUAACCUCCUUUUGUUAUCUCUAAUCAGACACAUAAGAGCAGGAUUAAAUAGAGCAGGGUUAUGGCAGGCUUGCAGGGAUGAGAGAAAAUGAUAUUGAUGGACUUUGAUGGCCAGGGGUUUUGACAGAAGAUAGAGAGCACAGAUGGAGAUUUGCAACAGUUGAUAAGAUC	270	317	305	864	1068	204	384	105	320	173	314	304	860	1054	197	380	104	318	171
	Sap-miR157d	ath-miR157d,aqc-miR156b,aqc-miR156a,aly-miR157d-5p,nta-miR156g,nta-miR156h,nta-miR156i,nta-miR156j,mdm-miR156x,mdm-miR156y,mdm-miR156z,mdm-miR156aa,cme-miR156f,ppe-miR156f,pab-miR156z	UGACAGAAGAUAGAGAGCAC	20	UGACAGAAGAUAGAGAGCACAGAUGGAGAUUUGCAAACAGUUGCUAAGAUCUUGGUCUCUCACCGACCGCCCGCUAAACCACCGCCACCGCCACCGCCCCCGCCGCCGCCAUCACAUAAUCUCCCUGCCCAUCCUUCCUUUGUGCUCUCUAUGCUUCUGUCAUCACCCCUUCUAUUUCUCAUCCCCCGAUCUCCCUCUCUCAGCUCUCACAGGGACACAGAUCCACUUUUGAUUGGGACUUGCAAUCAAUUAGAACUCAACAAUCUCUCUUGGAUAAGCUCAAAUACUAUGGAAUAUUAC	20	10934	3	9954	267	31	2873	0	1949	317	10037	3	9218	265	31	2800	0.001	1915	315
MIR159	Sap-miR159a	ath-miR159a,gma-miR159a-3p,ptc-miR159a,ptc-miR159b,bna-miR159,vvi-miR159c,sly-miR159,bra-miR159a,mtr-miR159a,pvu-miR159a.1,rco-miR159,aly-miR159a-3p,ahy-miR159,csi-miR159a-3p,gma-miR159e-3p,mes-miR159a-3p,nta-miR159,hbr-miR159a,htu-miR159a,cme-miR159a,mes-miR159b,ppe-miR159,cpa-miR159a,atr-miR159,mdm-miR159d,mdm-miR159e,mdm-miR159f	UUUGGAUUGAAGGGAGCUCUA	21	AAGAAGAGGAAGGGGAUAGGGUUGUGGCUUGCAUACAUCAGGAGCUUCAUUCGCUCAACUUAUCAGAUCCUUGUUUGGAUUGAAGGGAGCUCUACGCUCUGCUCUCUCCCUCACACGUUCCUUCUCCAUUAAUUCAGUUAUCCUCCAUCUUAAGGAGCUUUUGACUUCAUCACUGUGGAUCUUAUUGUUUUUGUAUUUUUCGCUUUUAACUCGUAUGCUUUCGAUCUUAUCAAACCUACGUGAUAAAAACCUAUAGAUCCAUGUAAAUAUGUACUUAUAAAGUGGUGUCACAUAGAGUUA	94	89	62	51	27	15	2	28	1	57	89	62	51	26	14	2	28	1	56
	Sap-miR159c	gma-miR159c	AUUGGAGUGAAGGGAGCUCCG	21	AUAAUCGCAACUCGGGAUAAGUUUGGUUGGAGGAGGAGCUCUCUUCGCUCCGACAGUGAGGGGAGAUGAAUGGUACACCACAGCUGCUGGUUCAUGGAUACCCUCAUCCAGGUUCAGGGACAAACACAGCGUCGAAGCCGAGGCUGCGAUCGAUGUUUAAGUUGACGGUCGCGAUGAAUCUUUAGUUUUCGAGCACUGGAAUGCGGGUUUGCAUGAGCUAGGAGAUGAGGUUGCCUCGAUCCUUUUGGUAUUGGAGUGAAGGGAGCUCCGCGACUCCCUGCUUCCCAGUAUAGCUCGUCU	270	1	0	0	0	0	0	0	0	1	1	0.001	0.001	0.001	0.001	0.001	0.001	0.001	1
MIR160	Sap-miR160	aau-miR160	UGGCAUACAGGGAGCCAGGCA	21	GCCAUCGCUCUUCCGGUGGAGCUCUGCAAAUGGCAUACAGGGAGCCAGGCACAUACUUAUACCUAUUCCAUCAUCGGGGUAUACGGCAUAUGAAGCUAGCCUCGAAUUUGGAUGCGUGAACUGGAUGGAAAUUAGUAUAUCGAUCAUCAUCACCAUGCGUUCGAGUUUUCACCUUCAAACUCCCGAGAGGAGAAGAAAUAAAAUCUCGGGGAAUUAAUCAAAAUCAAAUAGGAGAACUUAUUGGCUUGCUAAAGUAAAGCCAUCCCCCUCCACAAUUAUCAGCCAUAAAGGCAUUUGGGG	51	5	58526	26	14	28	8	75499	31	6	5	40234	26	13	28	8	47701	31	6
	Sap-miR160a-3p	ath-miR160a-3p,ptc-miR160b-3p,ptc-miR160c-3p,bra-miR160a-3p,csi-miR160a-3p,aly-miR160a-3p,cpa-miR160c-3p,cpa-miR160f-3p	GCGUAUGAGGAGCCAUGCAUA	21	GUCCGAACCCUAAUCUGGGGUUUCCCUUUUCCUCCUUCCACAACCUGUAAUUGAGCACCCAUCUCCUGCGGCUUCUCGUGCACCUAAGCUUUUGCCCAGGCCACAUAUGCCUUUCAUCCCUGAACUUUUUAACUUACGGCCUUGUUAGUGUGUAAUAUAGACAAUUGCACUGCUCGGGCAUCUGUAUGUGCCUGGCUCCCUGUAUGCCAUUUGCAGAGCACGUCGGAGAGUCGACGGCCUCCGUGGAUGGCGUAUGAGGAGCCAUGCAUAUAGCUCACAUGUUCUUUCGAUGAAGUGCUG	270	62	61	85	1	18	20	13	70	18	62	61	85	1	18	20	13	70	18
	Sap-miR160a-5p	ath-miR160a-5p,ath-miR160b,ath-miR160c-5p,osa-miR160a-5p,osa-miR160b-5p,osa-miR160c-5p,osa-miR160d-5p,zma-miR160a-5p,zma-miR160c-5p,zma-miR160d-5p,zma-miR160b-5p,zma-miR160e,sbi-miR160d,sbi-miR160a,sbi-miR160c,sbi-miR160b,sbi-miR160e,mtr-miR160a,gma-miR160a-5p,ptc-miR160a,ptc-miR160b-5p,ptc-miR160c-5p,ptc-miR160d,mtr-miR160b,mtr-miR160d,mtr-miR160e,ppt-miR160a,ppt-miR160e,ppt-miR160f,smo-miR160a,…	UGCCUGGCUCCCUGUAUGCCA	21	UGCCUGGCUCCCUGUAUGCCAUUUGCAGAGCACGUCGGAGAGUCGACGGCCUCCGUGGAUGGCGUAUGAGGAGCCAUGCAUAUAGCUCACAUGUUCUUUCGAUGAAGUGCUGUCUAACUUAACUUUAGGCGUCUCUUGCUGUUGAUUAAAUUAAUCAAUUAGCGCUAUUUAAAGAUUAUUUCUUCUCUAAAACCAUUUGUAUGUUACUGCAUCCAUACAAUCGCUGUGGAGCAGCUGAUGUGAUGGCAAGUUCUACUCCAAGUCUGACGAGGGCCUUUUUUACAGAAUCUGGAAAAAGGG	21	39	38	34	13	14	9	12	8	3	39	38	34	13	14	9	12	8	3
	Sap-miR160b	gma-miR160b,gma-miR160c,gma-miR160d,gma-miR160e,htu-miR160a,bdi-miR160f	UGCCUGGCUCCCUGUAUGCC	20	UGCCUGGCUCCCUGUAUGCCAUUUGCAGAGCACGUCGGAGAGUCGACGGCCUCCGUGGAUGGCGUAUGAGGAGCCAUGCAUAUAGCUCACAUGUUCUUUCGAUGAAGUGCUGUCUAACUUAACUUUAGGCGUCUCUUGCUGUUGAUUAAAUUAAUCAAUUAGCGCUAUUUAAAGAUUAUUUCUUCUCUAAAACCAUUUGUAUGUUACUGCAUCCAUACAAUCGCUGUGGAGCAGCUGAUGUGAUGGCAAGUUCUACUCCAAGUCUGACGAGGGCCUUUUUUACAGAAUCUGGAAAAAGGG	20	15091	83	22071	137	113	124	35	42620	119	13398	83	18710	137	111	122	35	32005	118
	Sap-miR160h_1	mes-miR160h	UGCCUGGCUCCCUGUAUGCCAUU	23	UGCCUGGCUCCCUGUAUGCCAUUUGCAGAGCUCAUCGGAGAAUCGAUAGCCCCCGCGGAUGGCGUAUGAGGAGCCAAGCAUAUAUUCACACAUGUUCUUCCAAUACAGUGACCAUUAUCUU	23	45	80	94	35	31	38	17	21	20	45	78	93	34	30	38	16	21	20
	Sap-miR160h_2	ptc-miR160h,nta-miR160d	UGCCUGGCUCCCUGCAUGCCA	21	UCCGGUAGGGAUAGAGCAUAGUGGUGAGCGUGCCUGGCUCCCUGCAUGCCAGCAGGAUGAGAUGUAUCGGGUGGGCAGCCAAAGGGGCUGCCACCCGGACGCCCAAGGAGGCUGCCCGAGAACAAUGGAGGCAUUGGGAAUUGGCCACCCUCGAGUGGGAAGUCUGGGUACUGAGGGAGUCUUAGCUUCUUCCGGGGCGGCGAGAACGGAGAGAGAUGGAUCGCCGGCAUGUUUGACACCAGUUCCACCAGCCACGGGCUGACUCGUUUCACGUUCUGGAGCAAAUCAGGCUCAUCCCAC	51	22	26	15	15	18	19	19	12	15	22	26	15	15	18	19	19	12	15
MIR162	Sap-miR162	bdi-miR162,pab-miR162a	UCGAUAAACCUCUGCAUCCGG	21	CGGUGGCGAUUGUUUCACCAUUUCUGUUUGUUACACAUAUGCGUUUCUUUAUGUUCGAUCCCCUGUAACUGUACUCCUAUAUGCCAUAUUGGAUCUGUAAGAUACUCUGAUAUGUCAGAACUGGCUCUCGAGUUGGUGGUCUUGGCUCGUGAUUCAUAGAUGCCCGAGAUGGAUGAUGUCACUGGAGGCAGCGGUUCAUCGAUCUCUUCCUGGAAUCUGUUAUGAAAUAUAAAACGGAACAUGAAUCGGUCGAUAAACCUCUGCAUCCGGCGCUCUGUCCUCUCUUAACUCUCUCCGGUC	270	18	95	18	4	311	2	1660	5	5	18	95	18	4	307	2	1636	5	5
	Sap-miR162-3p	zma-miR162-3p,gma-miR162a	UCGAUAAACCUCUGCAUCCA	20	UCUUGACCCUCAAGAGGCCACUCCUCUCAGAAAUGCAGCCAUUUUGAGCAAGAACAAGGGAUUACCCUUCUGUCCGUUUGAUUCGGAUCUGUAUCGUUUCGUUCUUCUUCUUCUUCUUCUUUUCCUCCUGCCGCUGCUGCUAUGUCUUCUGAUUUGGUUUUUGAGUGGGGUGGAGUCACUGGAGGCAGCGGUUCAUCGAUCUCUUCCUGGGAAUUUGUUGGCUCCUUAUAGCAACAAUUCAUGAAUUGGUCGAUAAACCUCUGCAUCCAGCGCUGACCCUCUUGUUUUCCCUGUCAGUGA	269	0	1	0	0	0	0	0	0	0	0.001	1	0.001	0.001	0.001	0.001	0.001	0.001	0.001
	Sap-miR162a-3p	ath-miR162a-3p,ath-miR162b-3p,osa-miR162a,mtr-miR162,ptc-miR162a,ptc-miR162b,ghr-miR162a,cpa-miR162a,vvi-miR162,sly-miR162,sbi-miR162,csi-miR162-3p,rco-miR162,aly-miR162a-3p,aly-miR162b-3p,tcc-miR162,gma-miR162b,gma-miR162c,aau-miR162,vun-miR162,lus-miR162a,lus-miR162b,nta-miR162a,nta-miR162b,pde-miR162,htu-miR162a,hpe-miR162a,mdm-miR162a,mdm-miR162b,cme-miR162,mes-miR162,stu-miR162a-3p,stu-miR16…	UCGAUAAACCUCUGCAUCCAG	21	AUUCUCUUUCUUUCAAGCGCCAUAUCACCCCUCCCGUCAAAUUCCACUCCUUUAAUGCAGGCAUUUUUUAACACACACAGAACUUGCCCUUUUGUCUGUCUGAUUCAGAUCUGUCUUCUUUCUUCUCCUCCUACCGCUGUUAUAUCUUCUGAUUUGAUCUUUAGGUAGGGUGGAGUCACUGGAGGCAGAGGUUCAUCGAUCUCUUCAUGGGAAUUUGUUGUCUUCCGGUAGCAGCAGUUCAUGAAUCGGUCGAUAAACCUCUGCAUCCAGCGCCAACCCCUCAUGUUUUACCCGUCAGUC	270	16	15779	24	47014	37695	29071	51927	11	33813	16	14015	24	34035	28849	23374	37060	11	26627
	Sap-miR162a-5p	ath-miR162a-5p,ath-miR162b-5p,csi-miR162-5p	UGGAGGCAGCGGUUCAUCGAUC	22	AAGAUUCCUGGUUCUGUUCCAUUUCUCUAAUUCAGUUUCUUUCUCUCUGCUGGUUAAAUUCAUUUGACGGUGGCGAUUGUUUCACCAUUUCUGUUUGUUACACAUAUGCGUUUCUUUAUGUUCGAUCCCCUGUAACUGUACUCCUAUAUGCCAUAUUGGAUCUGUAAGAUACUCUGAUAUGUCAGAACUGGCUCUCGAGUUGGUGGUCUUGGCUCGUGAUUCAUAGAUGCCCGAGAUGGAUGAUGUCACUGGAGGCAGCGGUUCAUCGAUCUCUUCCUGGAAUCUGUUAUGAAAUAUAAA	271	155	139	283	277	75	129	65	144	79	148	136	280	274	72	129	64	144	79
MIR164	Sap-miR164a	far-miR164a,far-miR164b	UGGAGAAGCAGGGCACUUGCU	21	UGCUGGGUUGGGGCUCUUGGGAGAAAAUAUUGGAGAAGCAGGGCACUUGCUCGUAAUCGUGAUCGCUGUUCAUGCCAAUGCCGAGUUGCUGGGCUGGGUCGAACGUAAUGUAGGAGUCCAUCAAUGGAGGGAGAGACGAAAUGCCUCUGUUUAGUCCGAAGCAGCUUGACUUUGAGGCUACUUCCCUGUUUUUGAAGAAGACACGACACAGAACCCAAUCCUCCUUGAGGUCGGAAGAUAUCGUGGGAGGACCGAAGGGCCCUUCCAUUCGGAAUUCAUGCAUGACCCAGUCAGUUUUCC	51	1579	1553	2137	4944	4550	3662	9132	6810	5022	1552	1524	2095	4816	4418	3622	8883	6657	4929
	Sap-miR164b	gma-miR164b,gma-miR164c,gma-miR164d	UGGAGAAGCAGGGCACGUGC	20	ACCACUCUCUCUCUCUCUCUCUCGAUAUCCUCUGUCUGAAGAUCGAUUGGCUGAUGACAAAACAGGAAGGUGCCUGAUGAGCAUGAUGGAGAAGCAGGGCACGUGCACUACCGACUCAUUGCAACUACUUGUAAAGCAGGGAAGAGGUAUCGGUUUGCACGAAUUGGCCACAGGGUUCUUCUGUUAGGUUGCAUAUGAGUGAGUCCUUCAUGUGCCCUCCUUCCCCAUCUUGACCACCGCGCCUUGAUUGUAUGAGAACUGCAGCAGUUAUAUAUUAGCCGAAGCCGACGGUACGAAACA	106	368	208	291	395	386	282	543	387	537	363	207	288	395	383	281	535	384	531
	Sap-miR164e	osa-miR164e	UGGAGAAGCAGGGCACGUGAG	21	UACUCUGGGCGGUGGCGGAGAGGAUGGGGCUGGAGAAGCAGGGCACGUGAGCCGAUUCAACCACAGGUUUGGCGUUCGCAGUCUGAGGUGGAGAGUCCAUCAACGGAGGCAGAGCAGAACCCGCUUCGGAUCCAACUCCCGUAAGACCCGAAAUAUGCGUCUUCUUCCCUCCUAGCGGCUUCUCGAAGACCCUGCUGAUCACCCAUUCGUUCUUUGCGGUUUCAGGGAGAUUGUGGCGGGAGAAUUUUCCGUCCAGCCUGAAUUCGUGCAUGACCCAAUUCAUCUUCUCACCCCUCGGGG	51	5	5	14	25	30	14	46	41	45	5	5	14	25	30	14	46	41	45
MIR166	Sap-miR166	ctr-miR166,csi-miR166a-3p,lus-miR166i,hbr-miR166b,lus-miR166k	UCGGACCAGGCUUCAUUCCCCC	22	CUCCCUUCUCCCUCUAUGUGAUUAUUAAACCUAGCUUCUUGCUUUUGUGAAGUCUUCCUGAUGUCUCCUUCCAUGGGUGUUGCUGAUGAGGAAGCCAUUUCUUUUGAGGGGAAUGUUGUCUGGCUCGAAGACCCCAACUAGACUAUCAAUGGAUUUCUGCCAUCGGAUCCAUUUCAUGUAAAUCAAUGGAUCCUAGAACCCGUGUUUCAGAUCCAAGCAAGAUGUGUGAUCAGUCAUGGUCGGUUGUCGUCGGACCAGGCUUCAUUCCCCCCAAUUAUAUGCUUCCAUUAGUGCUUCACC	271	35	53	68	72	112	73	134	143	159	35	52	67	71	106	70	131	138	154
	Sap-miR166-3p	lja-miR166-3p	AUUUCGGACCAGGCUUCAUUCCCC	24	ACAAACACAGAGAGUCCCAUCCCCUCUCUCCGUGCGUUUCUGAUAUUACCAGUUGAGGAGAAUGUCGUCUGGCCCGAGAUCGUUCAUGCCUUGCUGCAUCAGUUACAGCUUCGUCCGAUGGGGUGAUUUCGGACCAGGCUUCAUUCCCCUCAACUGGACGAUAGAGUUCUCAUCCCUCCAGUUAACCAAGGGUCAGGACUAUGAUCUUUCGGUCUGAUUUGCCGCGAAACGUUUUUGGAGAUUUCAGGUAAGCUUCCUUCCCGUCGCCAUAUCUCUUUGCUUGUGGCAAUUUGUACUGAU	149	283	199	273	337	552	198	718	821	1000	283	198	272	332	546	196	713	814	991
	Sap-miR166a	vvi-miR166a,vvi-miR166b,hbr-miR166a,pde-miR166a,pde-miR166b,mes-miR166j	UCGGACCAGGCUUCAUUCC	19	ACAAACACAGAGAGUCCCAUCCCCUCUCUCCGUGCGUUUCUGAUAUUACCAGUUGAGGAGAAUGUCGUCUGGCCCGAGAUCGUUCAUGCCUUGCUGCAUCAGUUACAGCUUCGUCCGAUGGGGUGAUUUCGGACCAGGCUUCAUUCCCCUCAACUGGACGAUAGAGUUCUCAUCCCUCCAGUUAACCAAGGGUCAGGACUAUGAUCUUUCGGUCUGAUUUGCCGCGAAACGUUUUUGGAGAUUUCAGGUAAGCUUCCUUCCCGUCGCCAUAUCUCUUUGCUUGUGGCAAUUUGUACUGAU	147	708	1110	1051	1975	1804	1948	1967	1521	2732	683	1078	1026	1917	1717	1872	1908	1478	2633
	Sap-miR166a-3p	ath-miR166a-3p,ath-miR166b-3p,ath-miR166c,ath-miR166d,ath-miR166e-3p,ath-miR166f,ath-miR166g,osa-miR166a-3p,osa-miR166b-3p,osa-miR166c-3p,osa-miR166d-3p,osa-miR166f,osa-miR166j-3p,zma-miR166a-3p,mtr-miR166a,gma-miR166a-3p,gma-miR166b,ptc-miR166a,ptc-miR166b,ptc-miR166c,ptc-miR166d,ptc-miR166e,ptc-miR166f,ptc-miR166g,ptc-miR166h,ptc-miR166i,ptc-miR166j,ptc-miR166k,ptc-miR166l,ptc-miR166m,mtr-miR16…	UCGGACCAGGCUUCAUUCCCC	21	CCUUCUCCCCUCUAUGUGAUUAUUAAACCUAGCUUCUUGCUUUUGUGAAGUCUUCCUGAUGUCUCCUUCCAUGGGUGUUGCUGAUGAGGAAGCCUUUUCUUUUGAGGGGAAUGUUGUCUGGCUCGAAGACCCCCCAACUAGACUAGCAAUGGAUUUCUGCCAUCGGAUCCAUUUCAUGUAAAUCAAUGGAUCCUAGACCCCGUGUUUCAGAUCAAGCAAGAUGUGUGAUCAGUCAUGGUCGGGUUGUCGUCGGACCAGGCUUCAUUCCCCCCAAUUAUAUGCUUCCAUUAGUGCUUCACC	270	249030	250912	241041	951848	932084	959338	802885	993825	960284	85097	86358	83976	207716	211344	205430	150819	149133	147475
	Sap-miR166c	pta-miR166c,far-miR166,cln-miR166	CCGGACCAGGCUUCAUCCCAG	21	CCGUGAGAAAUAGCAACGAUUCCAAUAGAUCCGGACCAGGCUUCAUCCCAGGCAAUUGGACCCACUCGACAGCAGUUCCAGUGGCCUUUGAAAGAAACUCUGCUAAAGUCUCCUCUGCAAUGGACAGAAGUCCAGCAGGGCUUGCAUCCUUCAGAGGAUGCUGAUGGAUUCGCGUGGUGCUGACCGACCGUUGUAACUGCAGAUUCACAGCUCGUGUCUGUGUAGAAGAGUAGCAUUCUGUGUCUGUGGACGGAAGUAACUGUUCUCAUAGACGAAGGUUUGUGAACUUGCUUCUGCUAC	51	744	946	953	3484	3016	2776	1711	1833	1611	674	912	930	3346	2858	2676	1605	1723	1512
	Sap-miR166d-5p	osa-miR166d-5p,zma-miR166c-5p,gma-miR166a-5p,mtr-miR166g-5p,csi-miR166e-5p,csi-miR166a-5p,aly-miR166a-5p,aly-miR166c-5p,aly-miR166d-5p,gma-miR166c-5p,bdi-miR166e-5p,gma-miR166l,stu-miR166a-5p	GGAAUGUUGUCUGGCUCGAGG	21	GGAAUGUUGUCUGGCUCGAGGUCGCAGAUCGUAGUUCCAUGGUUGUACAUCAAUUUUAAAGCAGUUUCUUUUCUCCUGAUUCAUGAUCAUUGGAGAAAUAUAUGCGAGAAUCUCAUCGGUCUUGGGAUAGGUGAUGUCGGACCAGGCUUCAUUCCCCCCAAUUAUCCCUUCCAAUCGUGCAUCUCUCAACACUUGACCACCCAAUCAAUUCCUUAGAAGGUAAUGAUACUCGAGUUUUUUUAAAUGUAAACUGGUCUUUUUUGCCAGAAAAAGAGUCCCUCUGUCAUGAUUUCUAGCUUA	21	20990	28165	26494	111680	104160	96812	80581	50649	53647	17642	22958	21656	76924	73228	68884	49265	36090	37641
	Sap-miR166e	cpa-miR166e	GGACCAGGCUUCAUUCCCC	19	UUGUGCCCCUUCGUAGACAACCACAUAUGCCGGUAGUGUAUUCAUUCAUGUUCAGUUUUCCUCGAUCUUGCUGGUGAAUUUGGGAAAAAAGAGGGAAGCUGUUGUUUUUGAGGGGAAUGUUGUCUGGCUCGAUGUCGUUAUUCGUAGAUCCAAUGAUAGCAUAUAAAUCCUUAUUUGUUUCAUCUUUCUAAUUUACCGACCGAGGCGUACAUGUUCACAUACUCGAUCAGUUCCUGAGUUAGCGACGUCGGACCAGGCUUCAUUCCCCCCAAUUGCUGCUUCUAGCUGCACGAUUCUCCC	268	343	308	2	615	809	121	1909	1127	837	336	305	2	612	796	120	1855	1110	829
	Sap-miR166h-3p	zma-miR166h-3p,zma-miR166e,zma-miR166i-3p,zma-miR166f,zma-miR166g-3p,zma-miR166b-3p,zma-miR166c-3p,zma-miR166d-3p,sbi-miR166d,sbi-miR166c,sbi-miR166b,sbi-miR166a,sbi-miR166h,sbi-miR166i,sbi-miR166j,csi-miR166c-3p,tcc-miR166b,gma-miR166p,gma-miR166q,gma-miR166r,gma-miR166s,gma-miR166t,cme-miR166g	UCGGACCAGGCUUCAUUCCC	20	ACAAACACAGAGAGUCCCAUCCCCUCUCUCCGUGCGUUUCUGAUAUUACCAGUUGAGGAGAAUGUCGUCUGGCCCGAGAUCGUUCAUGCCUUGCUGCAUCAGUUACAGCUUCGUCCGAUGGGGUGAUUUCGGACCAGGCUUCAUUCCCCUCAACUGGACGAUAGAGUUCUCAUCCCUCCAGUUAACCAAGGGUCAGGACUAUGAUCUUUCGGUCUGAUUUGCCGCGAAACGUUUUUGGAGAUUUCAGGUAAGCUUCCUUCCCGUCGCCAUAUCUCUUUGCUUGUGGCAAUUUGUACUGAU	148	4208	4684	4426	9822	9339	9816	9383	11151	11558	3997	4464	4242	8986	8538	8965	8611	10224	10438
	Sap-miR166m	gma-miR166m	CGGACCAGGCUUCAUUCCCC	20	AAUUCUAAUUUCAUCCAUAGACAUAUCAGGCAGUUACUCAUCCAUGCUCCAUAUCUUCAUCGAUCUUUGCAAGCGAGUCAGGAAAGGCAGGGAAGCGGUUGUUGUUUUGAGGGGAAUGUUGUCUGGCUCGAGGUCGCAGAUCGUAGUUCCAUGGUUGUACAUCAAUUUUAAAGCAGUUUCUUUUCUCCUGAUUCAUGAUCAUUGGAGAAAUAUAUGCGAGAAUCUCAUCGGUCUUGGGAUAGGUGAUGUCGGACCAGGCUUCAUUCCCCCCAAUUAUCCCUUCCAAUCGUGCAUCUCUCA	269	336	405	717	660	533	1354	2	2026	2436	335	401	711	649	533	1332	2	2002	2382
MIR167	Sap-miR167a	ccl-miR167a,ctr-miR167,ccl-miR167b,gma-miR167g,bdi-miR167c-5p,bdi-miR167d-5p,mes-miR167d,mes-miR167e,mes-miR167f,bdi-miR167e-5p,ppe-miR167c,cpa-miR167d,bdi-miR167g,ata-miR167b-5p,ata-miR167d-5p	UGAAGCUGCCAGCAUGAUCUGA	22	UGUCCCUUGCCUCAGAGCAAGUAGAGGGAGGAGAGAAAUGGAGAGACUCGAGGGGAAGUCGAGGAAGAGAGAGCUCGACGAGCGCACCGAAUUAGGGUUUCGCUUCGUCUUCGGGCUUCUAGUGCGCCAGUAGCAGUUGAAGCUGCCAGCAUGAUCUGAGCUUUCUUGUGCGGUCAUUGUUCGAGAAAGACUAGAUCAUCUGGCAGUUUCACCUGUUGAUGGUAAGCACGUACAUGAGCAUGAAAAGGGGCCUUUCCGCGCAUAAAACCCUAGCCCAAGAAGAGCGAGAGACGCGACAGU	159	25861	23342	24125	24601	24128	23525	16346	19441	17456	21278	19639	20075	20392	20002	19635	14328	16888	15167
	Sap-miR167a-3p	csi-miR167a-3p,mdm-miR167a	AGAUCAUCUGGCAGUUUCACC	21	UGUCCCUUGCCUCAGAGCAAGUAGAGGGAGGAGAGAAAUGGAGAGACUCGAGGGGAAGUCGAGGAAGAGAGAGCUCGACGAGCGCACCGAAUUAGGGUUUCGCUUCGUCUUCGGGCUUCUAGUGCGCCAGUAGCAGUUGAAGCUGCCAGCAUGAUCUGAGCUUUCUUGUGCGGUCAUUGUUCGAGAAAGACUAGAUCAUCUGGCAGUUUCACCUGUUGAUGGUAAGCACGUACAUGAGCAUGAAAAGGGGCCUUUCCGCGCAUAAAACCCUAGCCCAAGAAGAGCGAGAGACGCGACAGU	213	57	46	63	31	41	18	44	71	41	57	46	63	31	41	18	44	71	41
	Sap-miR167d_1	ath-miR167d,rco-miR167c,aly-miR167d-5p,cca-miR167,nta-miR167a,nta-miR167b,nta-miR167c,pab-miR167b	UGAAGCUGCCAGCAUGAUCUGG	22	CGAGGGUCACGAGGGUUCUCCAUUUUUCUUCUGUAGACAGAUAGAGAAAUGGAGAGACAUGAACCAAUCGUGUGCUGCUCCUCUUCCUCUUCCUCUUCCUCUUCCUCAUCUUCAUCAUCACCUUCUUCUUCUUCCAUGAGCUUCGUACGUAGCUCUAAUGGUCUCCAUGUCUUCUCAGCUCUCUUCCCUCGCCAGUAUAGUGGUGAAACAUGGUCUUUUUGAUUAUAUAUGCAUGUUGGUUUGAGAGGUUGAAGCUGCCAGCAUGAUCUGGUCAUGGUAACGCUAUCUGUUUCUCGCCCU	271	160488	45852	149147	132199	30285	4896	114033	123132	112587	71425	33740	68475	64735	23945	4676	60782	63017	59469
	Sap-miR167d_2	bna-miR167d,mes-miR167b,lja-miR167a,lja-miR167b,lja-miR167c,gma-miR167l	UGAAGCUGCCAGCAUGAUCU	20	CUAUCUUCAUGGCGCACACACACACAGAUAGAGAGAGAGAGAGAGAGAGAGAGAGACCCAGAUGGGAAGUCGAGGACCAGAGAGCUCGACGAGCAUAGCACUAGCUAGGGUUUCGCCUCGUCUUGAUGGUUCCCGUGUACCAGCGGCAGUUGAAGCUGCCAGCAUGAUCUGAGUUCUCUCCUCUCUUCCCUGGUCAUAGCCGAGAAAGUCUAGAUCAUCUUGGCAGUCUCACCUGCUGAUGGUAAGCACGACGAAUAUGUCUGCGGAAACCUUCUACCUUGAAAGCCUAGCUCAAGAAGA	170	26	110920	4470	26458	119037	146863	4697	25	26	23	59593	4325	21730	61632	67507	4502	25	26
	Sap-miR167f-5p	ptc-miR167f-5p,ptc-miR167g-5p,gma-miR167e,gma-miR167f,ahy-miR167-5p,csi-miR167b-5p,tcc-miR167c,lus-miR167b,cme-miR167c,mes-miR167g,mes-miR167h,cpa-miR167c	UGAAGCUGCCAGCAUGAUCUU	21	UCAUGACCUCUACGGCUAUAAGGAAGGGAAAGGAGGGGGAGAAAGAAAGGGGAGGAGCGAGUCGGGCAGUCGUCAUGUGGAUCGGGCACCAUUACCAGUUGAAGCUGCCAGCAUGAUCUUAACUUGCCUCUCCUGCUAGCUUCAUAGGCUUCUCGAAGGGAAGACCAGAUCAUGUGGUAGCUUCACCUGUUGCUGGUAGCACGAGGAGGGGG	120	16804	16912	16640	14365	13469	14013	10094	14552	11881	14745	14907	14623	12835	12128	12469	9288	13042	10846
	Sap-miR167h	mdm-miR167h,mdm-miR167i,mdm-miR167j,ppe-miR167d	UGAAGCUGCCAGCAUGAUCUUA	22	UCAUGACCUCUACGGCUAUAAGGAAGGGAAAGGAGGGGGAGAAAGAAAGGGGAGGAGCGAGUCGGGCAGUCGUCAUGUGGAUCGGGCACCAUUACCAGUUGAAGCUGCCAGCAUGAUCUUAACUUGCCUCUCCUGCUAGCUUCAUAGGCUUCUCGAAGGGAAGACCAGAUCAUGUGGUAGCUUCACCUGUUGCUGGUAGCACGAGGAGGGGG	121	12289	11024	11502	12822	12951	12681	11294	13432	12214	11046	10132	10511	11585	11634	11401	10288	12167	11094
MIR168	Sap-miR168_1	aau-miR168	AUUCAGUUGAUGCAAGGCGGGAUC	24	AACAGAAGCAGAAGCGAAGUACCGGAUUCGCAGGAGUCAGGACCUGAGAUCUAGGCACGGCGGAGUAGAGCAGGAGGAAAGAGAAUGGGAAGAAUGGGGGUGCAGGGGAGAAAAGCGAGAUCUACAUGCGCCCUUCACCGCUGUCUCCGAUUCAGUUGAUGCAAGGCGGGAUCCGAUUUAGCAGCUGAGGCCCGGCCGUGAGCCGCGCGGGGCGCCCCAUCUGGCCGGUCUGCGAUGGACAGGCGAACCGGUUCCCGACGUGGGUUGAGCCUAUCAACCCUGCCGCUAUGGCCGAAGCUA	173	0	58	71	0	0	39	37	33	0	0.001	57	71	0.001	0.001	39	37	33	0.001
	Sap-miR168_2	cme-miR168	UCGCUUGGUGCAGGUCGGGA	20	ACCUCUCUCCUCCCUUACCUAUCUCCUUUCAUACUCUCUCUCUCUCUCUCUCUCUGCAUAGCUCUUAGUUGAUAACGUCGAUAGCUCAGGAUUCCGACCGCUGGUGCGGUGGAGGUUUUUAGUCGCCGGCGGUCUCUGAUUCGCUUGGUGCAGGUCGGGAACUGACUCGCAGCUCCUCCGGAGCAGCAGCCGAGACCGUUCCGCGGUUCUUCUGCUCUGAGCGCAUAUUGGAUCCCGCCUUGCAUCAACUGAAUCGGAGGCCUGCGGUGAAAAUUCCAUGAUAACCCGAGCCUUUCUCCG	160	0	0	2	5	0	1	2	2	6	0.001	0.001	2	5	0.001	1	2	2	6
	Sap-miR168-3p	lja-miR168-3p	UCCCGCCUUGCAUCAACUGAAU	22	ACCUCUCUCCUCCCUUACCUAUCUCCUUUCAUACUCUCUCUCUCUCUCUCUCUCUGCAUAGCUCUUAGUUGAUAACGUCGAUAGCUCAGGAUUCCGACCGCUGGUGCGGUGGAGGUUUUUAGUCGCCGGCGGUCUCUGAUUCGCUUGGUGCAGGUCGGGAACUGACUCGCAGCUCCUCCGGAGCAGCAGCCGAGACCGUUCCGCGGUUCUUCUGCUCUGAGCGCAUAUUGGAUCCCGCCUUGCAUCAACUGAAUCGGAGGCCUGCGGUGAAAAUUCCAUGAUAACCCGAGCCUUUCUCCG	254	45	56	52	185	163	151	80	109	107	45	54	52	184	162	150	80	108	107
	Sap-miR168-5p	lja-miR168-5p	UCGCUUGGUGCAGGUCGGGAAC	22	AGCUUAAUGCUCGGGCUUACCGUCGGUUUGGAUUCGUCGGUACGGGGAGAUUUCAGUCACCGGCAGUCUCUGAUUCGCUUGGUGCAGGUCGGGAACUGACUUGGCGGCCGGCCCCGUCGGUGCAGCGGGCCAAACCGUUCUUGCGAUCACUCAGCUCUGAGCGCUUGUCGGAUCCCGCCUUGCAUCAACUGAAUCGGAGGCCUGUGGUGAAAGUUCCACGAUGGCCGAGCCUCUCUCCGCCGGUCCAGUGCAGAUCACAGCUCAGCCCACCUCGUUCCGGUACAAUCUAGAUUGAAAAUG	96	301	336	357	372	359	316	269	252	233	301	334	355	371	355	311	267	249	232
	Sap-miR168a-3p	ath-miR168a-3p,ptc-miR168a-3p,ptc-miR168b-3p,aly-miR168a-3p,mtr-miR168c-3p,sly-miR168b-3p,bra-miR168b-3p,bra-miR168c-3p,csi-miR168-3p	CCCGCCUUGCAUCAACUGAAU	21	AGCUUAAUGCCUCGGGGCUUACCGUCGGUUUGGAUUCGUCGGUACGGGGAGAUUUCAGUCACCGGCAGUCUCUGAUUCGCUUGGUGCAGGUCGGGAAACUGACUUGGCGGCCGGCCCCGUCGGUGCAGCGGGCCAAACCGUUCUUGCGUUCACUCAGCUCUGAGCGCUUGUCGGAUCCCGCCUUGCAUCAACUGAAUCGGAAGGCCUGCGGUGAAAGUUCCACGAUGGCCGAGCCUCUCUCCGCCGGUCCAGUGCAGAUCACAGCUCAGCCCACCUCGUUCCGGUACAAUCUAGAUUGAA	197	60608	67927	61633	318884	303952	329540	118074	165974	146070	40917	44244	41165	141344	139108	142188	80386	100432	92250
	Sap-miR168a-5p	ath-miR168a-5p,ath-miR168b-5p,gma-miR168a,ptc-miR168a-5p,ptc-miR168b-5p,bna-miR168a,vvi-miR168,ccl-miR168,crt-miR168,rco-miR168,aly-miR168a-5p,aly-miR168b-5p,tcc-miR168,mtr-miR168b,mtr-miR168c-5p,vun-miR168,mes-miR168a,cca-miR168a,lus-miR168a,lus-miR168b,nta-miR168d,nta-miR168e,mdm-miR168a,mdm-miR168b,ppe-miR168,atr-miR168,bra-miR168a-5p,pab-miR168a,csi-miR168-5p	UCGCUUGGUGCAGGUCGGGAA	21	UAGCUUCGGCCAUAGCGGCAGGGUUGAUAGGCUCAACCCACGUAUGGCAACUCUCUUCCCCUUUUCCUCCUCCCAGCUCAGAUUUGGAUGCUUUCAGUUGCCGGCGGUCUCUAAUUCGCUUGGUGCAGGUCGGGAACCGGUUCGCCUGUCCAUCGCAGACCGGCCAGAUGGCGCCCCGCGCGGCUCACGGCCGGGCCUCAGCUGCUAAAUCGGAUCCCGCCUUGCAUCAACUGAAUCGGAGACAGCGGUGAAGGGCGCAUGUAGAUCUCGCUUUUCUCCCCUGCACCCCCAUUCUUCCCA	136	11828	12386	11676	9000	8356	8376	1980	2177	1966	10760	11236	10602	8385	7786	7796	1871	2053	1873
	Sap-miR168b	gma-miR168b	UCGCUUGGUGCAGGUCGGG	19	ACCUCUCUCCUCCCUUACCUAUCUCCUUUCAUACUCUCUCUCUCUCUCUCUCUCUGCAUAGCUCUUAGUUGAUAACGUCGAUAGCUCAGGAUUCCGACCGCUGGUGCGGUGGAGGUUUUUAGUCGCCGGCGGUCUCUGAUUCGCUUGGUGCAGGUCGGGAACUGACUCGCAGCUCCUCCGGAGCAGCAGCCGAGACCGUUCCGCGGUUCUUCUGCUCUGAGCGCAUAUUGGAUCCCGCCUUGCAUCAACUGAAUCGGAGGCCUGCGGUGAAAAUUCCAUGAUAACCCGAGCCUUUCUCCG	159	2402	3077	2715	2578	2444	2200	1959	1727	1840	2319	2961	2640	2496	2320	2135	1880	1695	1799
MIR169	Sap-miR169a-3p	zma-miR169a-3p,zma-miR169b-3p	GGCAAGUUGUUCUUGGCUACA	21	GGCAAGUUGUUCUUGGCUACACGGUUCUUUCUGCUCCACAAGCUCGGCCUCAUUCGGUGUGAACGCAAGCUCGCCUCUGCACUCAUUCCGCCAUCAUCUCCAUCCUUGAAGCUUUUGAAGUCCAUUCCUCUGGCACUGUGGAGCCACUUCAAAGAAGAAAUGCUUGUAAAAGGCGCGAGGCUCCUUCUGUAUCCUCCGUCUGCAUAUAUGCUCUAGUGGCGUACCCGCUCGACGCCUGCAUAGAAACACAUGCUCCGGCAGUCGAUGAAUGGUUGCCCGCACGCAACAAGGUUGCAUCUG	21	234	235	222	46	46	49	45	48	52	232	232	222	45	46	49	45	48	51
	Sap-miR169a-5p	ath-miR169a-5p,osa-miR169a,zma-miR169a-5p,zma-miR169b-5p,sbi-miR169a,mtr-miR169a,ptc-miR169a,ptc-miR169b-5p,ptc-miR169c,bna-miR169a,bna-miR169b,vvi-miR169f,vvi-miR169g,gma-miR169b,sly-miR169c,aly-miR169a-5p,tcc-miR169a,tcc-miR169c,tcc-miR169e,bdi-miR169a-5p,lus-miR169g,lus-miR169l,nta-miR169a,nta-miR169b,nta-miR169c,nta-miR169d,nta-miR169e,nta-miR169f,nta-miR169g,nta-miR169h,nta-miR169i,nta-miR16…	CAGCCAAGGAUGACUUGCCGA	21	AAAGACUCAUGCAGCCAAGGAUGACUUGCCGACCGAUCGAUCGAUGAUCUCCUCCUUUCGACCACGUUAACGGGAAGAGGGCCAUGUGUUAUGAAGAUCGACGGGUCGAUGGAAUCGGCAAGUUGUCCAUGGCUACACGUUCCUUUCUGCUCCAAAAGCUUGGCCUCAUUUGGUGAAGUAAGCUCCCCACAUUCUACCAUCCGUCUUCGAAGCCGCUGAGUCCAUUCCUAUAAUCACUCCAUGGAAAUGCUCGUCAAAGUCGCCUUUUGAUUGUCAUAUCCAAACAUCAAUGCAGGGUUC	32	340	317	292	87	86	108	170	226	239	337	315	292	86	85	108	169	226	239
	Sap-miR169b-3p	ptc-miR169b-3p	GGCAGGUUGUUCUUGGCUAC	20	AUAUCCCCUUCUCGCUGCGUUCUCCGUGUCGAUCAGGAGGAUGCCCUAGCUAGUAGAUCCAUGCUGGGAUCGAUCUGCCCGGGUGGACGAGUCUGGACUUCAGAAAUGUGGUGAAGGGGUCUUGCGUGAAGAGGAUGAGAGAGUCGAAUGCAGCCAAGGAUGACUUGCCGGCCACGCACUGGUAAGGGGGCCCAUGGCUGGGCUAUAAGUCCCCGAGCUACAGAGAUGGCUCCUUCGGUCCGGCGGCCCGGCAGGUUGUUCUUGGCUACACUCGGUUCUCUCCCUCUCCUGUGAGACCUU	269	7	3	5	0	0	0	0	0	1	7	3	5	0.001	0.001	0.001	0.001	0.001	1
	Sap-miR169b-5p	ath-miR169b-5p,ath-miR169c,osa-miR169b,osa-miR169c,sbi-miR169b,gma-miR169a,zma-miR169c-5p,ptc-miR169d,ptc-miR169e,ptc-miR169f,ptc-miR169g,ptc-miR169h,ptc-miR169p,mtr-miR169g,mtr-miR169b,vvi-miR169a,vvi-miR169c,vvi-miR169j,vvi-miR169k,vvi-miR169s,vvi-miR169w,sly-miR169a,sbi-miR169k,aqc-miR169c,zma-miR169r-5p,rco-miR169a,rco-miR169b,aly-miR169b-5p,aly-miR169c-5p,tcc-miR169b,tcc-miR169k,tcc-miR169l,…	CAGCCAAGGAUGACUUGCCGG	21	CUCAGGAUAAUGUCUUUCCAGAAAUAACAUGUAGAAAGGCGCAGCCCGACAAUUAUUCAUGAGAGUUCUCCCUUUUUUUUUAACUUUUUGAGGUCUAAGAGGCUUGCAUGAAGAGGUAGAGAGAUUGGAGUGCAGCCAAGGAUGACUUGCCGGCGACCACUUUAGCAAGUGAAAUCGAUCAAUCAUCGAUAUGUCAGGUGGGAAGCCGGCAAGUUGUUCUUGGCUACAUUUACCUCUCUUCUUCUCAUGUGAGGUUCAUUAGACCCGCUAACCACUGGUCUCUUAAACAAGUGCUUCCUA	153	349	436	440	96.5	83.5	100	250	150	263	334	427	435	96	82.5	99	237	148	257
	Sap-miR169d-5p	sbi-miR169d-5p,mes-miR169ac,stu-miR169a-5p,stu-miR169b-5p,stu-miR169c-5p,stu-miR169d-5p,stu-miR169e-5p,stu-miR169f-5p,stu-miR169g,stu-miR169h,atr-miR169a,atr-miR169c,csi-miR169b-5p,csi-miR169c-5p,csi-miR169d-5p,csi-miR169e-5p,csi-miR169f-5p,csi-miR169h-5p,csi-miR169i-5p,csi-miR169j-5p,csi-miR169l-5p,csi-miR169p-5p,csi-miR169q-5p	UAGCCAAGGAUGACUUGCCU	20	UUCUCUUUCAUGCCAGGCUCUAGAGUCUCGAUCUGGCUCGUCUCUUCCAUCACGGGACUGCGAGGGCCGGAACUGCACGAAAAUGGAGGGGGAGGGGGAGGGAGCGGGGAGGAGGAGGAAGCGAUCCGAAGGGGAAGGAGAGGAGGCCCGGCAUGAAGAUGAGGGCUGGUUCGGUAGCCAAGGAUGACUUGCCUGAGACGUGCAAGGCGGCUCUAUGCGGUCGGAUAUCGCCGUUCGGUCCCGAACGUACGAGCUCCUCACGGGCCCCAGGCCGUCUCCUUGGCUAUGCUGACGAGCCGU	194	362994	348488	334534	305071	305324	274637	201907	222199	206117	97163	96718	94207	91534	93265	86970	81137	82629	79426
	Sap-miR169e	gma-miR169e	AGCCAAGGAUGACUUGCCGG	20	ACGGGCUCAGGAUAAUGUCUUUCCAGAAAUAACAUGUACAAAGGCGCAGCCCGACAAUUAUUCAUGAGAGUUCUCCCUUUUUUUUAACUUUUUGAGGUCUAAGAGGCUUGCAUGAAGAGGUAGAGAGAUUGGAGUGCAGCCAAGGAUGACUUGCCGGCGACCACUUUAGCAAGGGAAAUCGAUCAAUCAUCGAUAUGUCAGGUGGGAAGCCGGCAAGUUGUUCUUGGCUACAUUUGCCUCUCUUCUUCUCAUGUGAGGUUCAUUAGACCGCGCUAACCACUGGUCUCUUAUACAAGUGCU	157	4209	3519	3497	512.5	523.75	399.25	1254.5	1158	1251.5	4113	3342	3442	499.75	517.75	395.25	1201	1145.5	1217
	Sap-miR169h	ath-miR169h,ath-miR169i,ath-miR169j,ath-miR169k,ath-miR169l,ath-miR169m,ath-miR169n,osa-miR169h,osa-miR169i-5p.1,osa-miR169j,osa-miR169k,osa-miR169l,osa-miR169m,sbi-miR169f,sbi-miR169g,zma-miR169i-5p,zma-miR169k-5p,zma-miR169j-5p,ptc-miR169i,ptc-miR169j,ptc-miR169k,ptc-miR169l,ptc-miR169m,ghb-miR169a,sly-miR169b,sbi-miR169l,aqc-miR169b,aly-miR169h-5p,aly-miR169i-5p,aly-miR169j-5p,aly-miR169k-5p,a…	UAGCCAAGGAUGACUUGCCUG	21	UUCUCUUUCAUGCCAGGCUCUAGAGUCUCGAUCUGGCUCGUCUCUUCCAUCACGGGACUGCGAGGGCCGGAACUGCACGAAAAUGGAGGGGGAGGGGGAGGGAGCGGGGAGGAGGAGGAAGCGAUCCGAAGGGGAAGGAGAGGAGGCCCGGCAUGAAGAUGAGGGCUGGUUCGGUAGCCAAGGAUGACUUGCCUGAGACGUGCAAGGCGGCUCUAUGCGGUCGGAUAUCGCCGUUCGGUCCCGAACGUACGAGCUCCUCACGGGCCCCAGGCCGUCUCCUUGGCUAUGCUGACGAGCCGU	195	2125	1964	2448	739	595	742	838	690	552	2049	1882	2376	718	581	735	815	666	532
	Sap-miR169r-3p	zma-miR169r-3p,aly-miR169a-3p,ata-miR169d-3p	GGCAAGUUGUCCUUGGCUACA	21	UCCCUAGCUUGUAGACAGCCGAAAGCACUCAUGCAGCCAAGGGAUGACUUGCCGACCGAUCGAUCGAUGAUCUCCUCCUUUCGACGCACGGUUAACGGGAAGAGGGCCACGUGUUAUGAAGAUCGACGGGUCGAUGGAAUCGGCAAGUUGUCCUUGGCUACACGUCUUCCCUUUUCUCGCUCCAAAAGCUUGGCCUCAUUUGGUGAAGGUUCUGAUCACCCAGAACACGAAUGGGCAUGUGCUAAACGUAGCUUCUGGUUGAGGAUUCGACCAUAUCGACAGCGGGCGGGCGUAACAGCA	162	156	123	249	82	69	44	8	18	13	155	119	248	82	68	44	8	18	13
	Sap-miR169v	gma-miR169v	CAGCCAAGGAUGACUUGCC	19	AGUGAUGGAGAGAUUGGCUUCAUCUAAUCCAUGUGUUUUCUCCACCUUUGUCCUAGCUUGUAGACAGCCGAAAGACUCAUGCAGCCAAGGAUGACUUGCCGACCGAUCGAUCGAUGAUCUCCUCCUUUCGACCACGUUAACGGGAAGAGGGCCAUGUGUUAUGAAGAUCGACGGGUCGAUGGAAUCGGCAAGUUGUCCAUGGCUACACGUUCCUUUCUGCUCCAAAAGCUUGGCCUCAUUUGGUGAAGUAAGCUCCCCACAUUCUACCAUCCGUCUUCGAAGCCGCUGAGUCCAUUCCUA	100	119	146	134	1015	850	1045	225	241	229	117	142	134	1010	835	1035	222	240	225
MIR171	Sap-miR171	ctr-miR171,mes-miR171a,ppe-miR171h,mdm-miR171a,mdm-miR171b,mdm-miR171p,csi-miR171e-3p,csi-miR171g-3p	UUGAGCCGCGUCAAUAUCUCC	21	AGUAAAGGACCCUCCCGGUAUCUCUCUCUCUCUCUCUCUCUCUCGUUCUGUUUUCUGCACAGCGACCUUCUCCUUCUCCUUCUUCUUCAGAAGAGCAUGAUCAGAGUCACAACAAGGAUGAAGAAGAUGCAUGGAUGGAUUUAUGCAGAUAUGGGGAGAGAGUUGGACUAAUGACGGAGAUAUUGGCGCGUCUCAAUUCAAGGACGUGGUUGACUGCGAAGAUGGAAGGGUUUGAGCCAUGUAAUUCGAUUGAGCCGCGUCAAUAUCUCCAUCUUCGAACUCUCACCCAUCUUCUCUUCC	270	14214	14289	12421	38892	43368	45132	25496	28726	29283	12683	12841	11265	33562	36828	38078	21140	23435	23778
	Sap-miR171a-3p	zma-miR171a-3p	UGAUUGAGCCGCGCCAAUAU	20	UCAAAACUUAGUACGUGUACCCUAUUAAACCCCAUCUAAAGCUUCUAGGAAGGGCCUUGGUUACAAGUGAAGUUUGCAAACUGGACCACAGGGGAGAUCUCACAGAAGGGACUUGUAAGCUCCCUAUCUUAUAUAUAAGGCCAAAAGGUGGAGGAGGGAGAGGAGGAAGAUUUGGCAGGGCCCACAAGGUGGGGAUGUUGGCUGUGGAGAAGAGAUUGAAGGGCCCUCCUUGCAGUAGAAAGCAGCCCGAGUGAAAGGCUUCCCUACAGGAGAGAGCUGGUGAUUGAGCCGCGCCAAUAU	300	52	43	55	35	22	29	16	9	23	51	42	55	35	22	29	16	9	22
	Sap-miR171b	osa-miR171b,osa-miR171c-3p,osa-miR171d-3p,osa-miR171e-3p,osa-miR171f-3p,sbi-miR171b,sbi-miR171d,sbi-miR171a,zma-miR171d-3p,zma-miR171j-3p,zma-miR171e-3p,zma-miR171i-3p,ptc-miR171e,ptc-miR171f,ptc-miR171g-3p,ptc-miR171h-3p,ptc-miR171i,mtr-miR171d,tae-miR171a,vvi-miR171a,vvi-miR171c,vvi-miR171d,vvi-miR171i,sly-miR171a,sbi-miR171i,sbi-miR171k,bdi-miR171c-3p,aqc-miR171a,aqc-miR171b,aqc-miR171d,crt-mi…	UGAUUGAGCCGUGCCAAUAUC	21	CUCUGUUCCGUCUUCCAUAUCUUGUUUUCCCUGCAUGUGCGUGUGAAGGCGUGCAUAAAUACCCAGCAUUGAUUGAUCCAAGGAGUCAUUCCACCGCGAUGAACAUGUCAGCAAAGCAUCGAUCCCACCAGCUCGAGGAGUGGUACAUCGGCAAGCCAGGUAUGCGGUAGCUUAGAAGAGGAGGGAGGGAGGGAGGGAGGGAGGGAGGGAGGGAGAGAUGUUGGACCGGCUCAAUCAAAUCAGAUUGCCCGAAGGUGAAGUUCUUUGCGCCGUCUGAUCUGAUUGAGCCGUGCCAAUAUC	300	17	12	13	75	83	53	93	126	207	17	12	13	75	81	51	90	126	205
MIR172	Sap-miR172a_1	ath-miR172a,ath-miR172b-3p,osa-miR172a,osa-miR172d-3p,gma-miR172a,gma-miR172b-3p,ptc-miR172a,ptc-miR172b-3p,ptc-miR172c,ptc-miR172f,sly-miR172a,sly-miR172b,bra-miR172a,bra-miR172b-3p,bol-miR172a,bol-miR172b,aqc-miR172a,aly-miR172a-3p,aly-miR172b-3p,tcc-miR172b,tcc-miR172e,bdi-miR172a-3p,mtr-miR172b,mtr-miR172c-3p,gma-miR172h-3p,ssl-miR172,vun-miR172,dpr-miR172a,dpr-miR172b,bna-miR172a,egu-miR172a…	AGAAUCUUGAUGAUGCUGCAU	21	GCCACUUUCGAUUAAUCGAAAGAGGGUUUUAAUCGUGAAACAGUUUGGUGGGAUCGGCUUCCGCACAAAAUGAGAACUGCCGCGGUCGGUCUACUUUUUCUGAACACGUGGAAUGGUGCAGUCAGUGAGAUCAAUUCAUCAGUGAGAACGUUCUUAGGCCUUUUUGCCCCGUGACUGGUCGUACAGUUGUUGUUUGCUGGUGUAGCAUCAUCAAGAUUCACACGCUGAAUCUGCUUGAAGGUGGAAGUGAGAAUCUUGAUGAUGCUGCAUCAGCAGUAUACAAGCUAAAUAUGCAGAAAG	270	7	4	0	0	0	0	0	0	0	7	4	0.001	0.001	0.001	0.001	0.001	0.001	0.001
	Sap-miR172a_2	cpa-miR172a,cpa-miR172b	GGGAAUCUUGAUGAUGCUGCA	21	GAAGAAAUGGCAAAAGCUCCUCUUUGAUAUGGGAAUCUUGAUGAUGCUGCAGCGGCAAUAAUUGGCUAAUUCAUGAGCCGAAGUUCUUUCUGCAUCGACACAGCAUAAGCAAACCAAUGAUACUCCCCACCCAUCCAAUAGUGAGGUGAAGCUAAGUAUAUCAAUCGGUAAGUUCAGUUGCAAGCACUUAUAACUUAAUCAUCUUUUAAAAAGCCUUCUUACAUGUACAAAUACUGCGUCUACAGUCGAAACAACCCCCAUAGGCUAAGGCUCAGUUCUGUUCAAAUGGUUCUUUUGCUG	51	309	276	322	619	601	536	51	51	55	292	267	317	611	594	532	48	49	53
	Sap-miR172a_3	zma-miR172a,zma-miR172d-3p,zma-miR172b-3p,zma-miR172c-3p,sbi-miR172c,sbi-miR172a,sbi-miR172d,csi-miR172a-3p,gma-miR172f,mdm-miR172a,mdm-miR172b,mdm-miR172c,lja-miR172b,lja-miR172c,mtr-miR172d-3p	AGAAUCUUGAUGAUGCUGCA	20	CGUCUCUGUCCAUCUACAGGAGGAACUUCAAACAGUUCGAUGUACUACUCAUCUUUCUGCACUACAUCAGAACUGUCCACGGUUUUGUUUGAAGACAUGGACUGAUUAACAUAUGAGAUGAUCACCUUUCUCGAUCAGGUUUUCUUUCUCGAUUCAGUUGUUGUUUGCGGGUGUAGCACCAUCAAGAUUCACAUGCCGAAUCUGCCCGGAAGUCAUUUCAGUAGCUAUUGCCAGUAGUUCCGGGAAGUGAGAAUCUUGAUGAUGCUGCAUCGGCAAUAAACAACUAUAACAGGAGAAUGU	269	15947	15047	15894	6163	6198	5867	4898	6463	5515	14106	13332	13950	5849	5879	5556	4667	6128	5235
	Sap-miR172b_1	sbi-miR172b,tcc-miR172a,atr-miR172	GGAAUCUUGAUGAUGCUGCA	20	GAAGAAAUGGCAAAAGCUCCUCUUUGAUAUGGGAAUCUUGAUGAUGCUGCAGCGGCAAUAAUUGGCUAAUUCAUGAGCCGAAGUUCUUUCUGCAUCGACACAGCAUAAGCAAACCAAUGAUACUCCCCACCCAUCCAAUAGUGAGGUGAAGCUAAGUAUAUCAAUCGGUAAGUUCAGUUGCAAGCACUUAUAACUUAAUCAUCUUUUAAAAAGCCUUCUUACAUGUACAAAUACUGCGUCUACAGUCGAAACAACCCCCAUAGGCUAAGGCUCAGUUCUGUUCAAAUGGUUCUUUUGCUG	51	543	857	1188	478	658	345	350	297	165	535	844	1181	477	652	344	344	295	165
	Sap-miR172b_2	vvi-miR172b	UGAAUCUUGAUGAUGCUACAC	21	UCACUUCCACCUUCAAGCAGAUUCAGCGUGUGAAUCUUGAUGAUGCUACACCAGCAAACAACAACUGUACGACCAGUCACGGGGCAAAAAGGCCUAAGAACGUUCUCACUGAUGAAUUGAUCUCACUGACUGCACCAUUCCACGUGUUCAGAAAAAGUAGACCGACCGCGGCAGUUCUCAUUUUGUGCGGAAGCCGAUCCCACCAAACUGUUUCACGAUUAAAACCCUCUUUCGAUUAAUCGAAAGUGGCGAACUAAUGCCAAGAACUGCAGUUGAUUAGGCGAACCUAGGCUUUAUAUA	51	465	673	303	439	411	343	2538	2181	1782	459	665	301	436	407	340	2505	2166	1770
	Sap-miR172b-5p_1	gma-miR172b-5p	GUAGCAUCAUCAAGAUUCAC	20	UAUAAAGCCUAGGUUCGCCUAAUCAACUGCAGUUCUUGGCAUUAGUUCGCCACUUUCGAUUAAUCGAAAGAGGGUUUUAAUCGUGAAACAGUUUGGUGGGAUCGGCUUCCGCACAAAAUGAGAACUGCCGCGGUCGGUCUACUUUUUCUGAACACGUGGAAUGGUGCAGUCAGUGAGAUCAAUUCAUCAGUGAGAACGUUCUUAGGCCUUUUUGCCCCGUGACUGGUCGUACAGUUGUUGUUUGCUGGUGUAGCAUCAUCAAGAUUCACACGCUGAAUCUGCUUGAAGGUGGAAGUGAGA	269	8	12	16	6	4	1	1	5	3	8	12	16	6	3	1	1	5	3
	Sap-miR172b-5p_2	ptc-miR172b-5p,ptc-miR172g-5p,aly-miR172c-5p,stu-miR172d-5p,aly-miR172f-5p	GGAGCAUCAUCAAGAUUCACA	21	AGGGGGAAGAAACAGCCAGUGUUUGCGGAUGGAGCAUCAUCAAGAUUCACAAUCUUACGGAGAGGGCAUUUGUUUUGGUCUUGUGGAUGAGCAAAACCAAACAGCACUUAUCGUCUGGGUAGGUUGAAUCCUGUAUUCAAUUUCAAGCCCUAGAGCAUGGGGGAAGAAAUGGCAAAAGCUCCUCUUUGAUAUGGGAAUCUUGAUGAUGCUGCAGCGGCAAUAAUUGGCUAAUUCAUGAGCCGAAGUUCUUUCUGCAUCGACACAGCAUAAGCAAACCAAUGAUACUCCCCACCCAUCCAA	51	4	6	2	2	3	6	6	2	2	4	6	2	2	3	6	6	2	2
	Sap-miR172c-3p	stu-miR172c-3p	AGAAUCUUGAUGAUGCUGC	19	GCCACUUUCGAUUAAUCGAAAGAGGGUUUUAAUCGUGAAACAGUUUGGUGGGAUCGGCUUCCGCACAAAAUGAGAACUGCCGCGGUCGGUCUACUUUUUCUGAACACGUGGAAUGGUGCAGUCAGUGAGAUCAAUUCAUCAGUGAGAACGUUCUUAGGCCUUUUUGCCCCGUGACUGGUCGUACAGUUGUUGUUUGCUGGUGUAGCAUCAUCAAGAUUCACACGCUGAAUCUGCUUGAAGGUGGAAGUGAGAAUCUUGAUGAUGCUGCAUCAGCAGUAUACAAGCUAAAUAUGCAGAAAG	268	17	17	30	19	19	17	47	38	57	17	16	30	18	18	17	46	36	54
	Sap-miR172c-5p	mtr-miR172c-5p	GUAGCAUCAUCAAGAUUCACA	21	UAUAAAGCCUAGGUUCGCCUAAUCAACUGCAGUUCUUGGCAUUAGUUCGCCACUUUCGAUUAAUCGAAAGAGGGUUUUAAUCGUGAAACAGUUUGGUGGGAUCGGCUUCCGCACAAAAUGAGAACUGCCGCGGUCGGUCUACUUUUUCUGAACACGUGGAAUGGUGCAGUCAGUGAGAUCAAUUCAUCAGUGAGAACGUUCUUAGGCCUUUUUGCCCCGUGACUGGUCGUACAGUUGUUGUUUGCUGGUGUAGCAUCAUCAAGAUUCACACGCUGAAUCUGCUUGAAGGUGGAAGUGAGA	270	2	1	1	1	0	0	0	0	0	2	1	1	1	0.001	0.001	0.001	0.001	0.001
	Sap-miR172d	vvi-miR172d,aau-miR172	UGAGAAUCUUGAUGAUGCUGCAU	23	UCGCCACUUUCGAUUAAUCGAAAGAGGGUUUUAAUCGUGAAACAGUUUGGUGGGAUCGGCUUCCGCACAAAAUGAGAACUGCCGCGGUCGGUCUACUUUUUCUGAACACGUGGAAUGGUGCAGUCAGUGAGAUCAAUUCAUCAGUGAGAACGUUCUUAGGCCUUUUUGCCCCGUGACUGGUCGUACAGUUGUUGUUUGCUGGUGUAGCAUCAUCAAGAUUCACACGCUGAAUCUGCUUGAAGGUGGAAGUGAGAAUCUUGAUGAUGCUGCAUCAGCAGUAUACAAGCUAAAUAUGCAGAA	272	601	768	942	984	907	882	3540	2982	2427	592	758	933	967	893	875	3504	2958	2391
	Sap-miR172e-3p	aly-miR172e-3p	GAAUCUUGAUGAUGCUGCAU	20	GUCUCUGUCCAUCUACAGGAGGAACUUCAAACAGUUCGAUGUACUACUCAUCUUUCUGCACUACAUCAGAACUGUCCACGGUUUUAUUUGAAGACAUGGACUGAUUAACAUAUGAGAUGAUCACCUUUCUCGAUCAGGUUUUCUUUCUCGAUUCAGUUGUUGUUUGCGGGUGUAGCACCAUCAAGAUUCACAUGCCGAAUCUGCCCGGAAGUCAUUUCAGUAGCAAUUGCCAGUAGUUCCGGGAAGUGAGAAUCUUGAUGAUGCUGCAUCGGCAAUAAACAACUAUAACAGGAGAAUGUG	269	0	0	0	1	0	0	0	0	0	0.001	0.001	0.001	1	0.001	0.001	0.001	0.001	0.001
	Sap-miR172g-3p	ptc-miR172g-3p,ptc-miR172h-3p,vvi-miR172c,gma-miR172c,rco-miR172,lus-miR172e,lus-miR172i,mdm-miR172l,cme-miR172a,mes-miR172e,mes-miR172f,stu-miR172d-3p,ppe-miR172d,sly-miR172d	GGAAUCUUGAUGAUGCUGCAG	21	CAGAAAAAACAGCCGAUGUUUGCUGAUGGAGCAUCAUCAAGAUUCACAGUCUUUUCGAGGGGGCUUUCGUUUCGGUAUUUGUGGAUUACCAAACUAAGACUACUUACGGGCUGGGUGUUGGGGUGGUGGUGGGUGGGGUGUUUGUGGUUGAUACUGAAUCUGGCGUUCCCUUUUCAUAGCGCUCAUCUCUCCAGUAAUUCGAGCCCUAGAACAGGGCGGAGAAUAAGAGCAGAAGCCCUAUUUGAUAUGGGAAUCUUGAUGAUGCUGCAGCGGCAAUAAUUGGCUAGCUAUUUCGAGGAG	270	1320	512	1194	946	2561	668	4477	7882	7176	1301	509	1182	937	2494	666	4305	7402	6809
MIR319	Sap-miR319	pta-miR319	UUGGACUGAAGGGAGCUCC	19	AUAUAGAUCAGUGACAUGGGCUUGAUUUACUGGGAGCUCCGUUCGGUUCAAUAAGGAGGGCCGAGAGGCGGCACGAGCUGCCAUCUCAUGCACUGGGCUAUGCUCAUCAUUCACGAGAAUCGUGAUCAGGUGACCGGCCGAUCAGCAGACAGACCAGAGACAGCUAGCAGCCGUAGGGCAAAACAAUGAUAAGCUUAGCCGAGCGCAUGGUGUGGGAGCAACUCCGUCCGCUCUUACUUUGCCCGCCCAUUGGACUGAAGGGAGCUCCCCCACACGUCCUAGUCCCGAUUCAACCAACUU	268	46	0	122	68	16	0	4	32	23	46	0.001	122	68	15	0.001	4	32	22
	Sap-miR319a_1	ath-miR319a,ath-miR319b,vvi-miR319b,vvi-miR319c,vvi-miR319f,aqc-miR319,rco-miR319a,rco-miR319b,rco-miR319c,aly-miR319a-3p,aly-miR319b-3p,tae-miR319,gma-miR319h,gma-miR319j,gma-miR319k,gma-miR319m,aau-miR319,amg-miR319,vun-miR319a,cca-miR319,lus-miR319a,nta-miR319a,nta-miR319b,hbr-miR319,mdm-miR319a,mdm-miR319b-3p,mes-miR319a,mes-miR319b,mes-miR319c,mes-miR319d,mes-miR319e,mtr-miR319d-3p,stu-miR31…	UUGGACUGAAGGGAGCUCCCU	21	UUCUUUAUCAUGAUUUUCUUUAUUUAGCAAUCCGAUCCUGACGUAUAUCCAUGAUCCCACAUUGGUUGCUGUAUACAGUGGAGUGGAGGAGAUUAGAGAGAGCUUUCUUCAGUCCAUUCAAGGGGGGCCUCUGGAUUCAACUAGCUGCUGACUCAUUCACCCAAAUGCCGAGUGACAAGCUUGGUAUGUUAUCGCUCUGUAAAUGAGUGAAUGAAGCAGGAGACUUGUUGAAUCAUAAGCUCCCCUCGCUUGGACUGAAGGGAGCUCCCUCGUAUUCGGCGAAUUCCAUAUGAUCAAAUU	270	382	417	493	115	144	100	104	131	83	382	414	491	115	142	100	103	131	83
	Sap-miR319a_2	ppt-miR319a,ppt-miR319b,sly-miR319a	CUUGGACUGAAGGGAGCUCC	20	GGUUCUUUAUCAUGAUUUUCUUUAUUUAGCAAUCCGAUCCUGACGUAUAUCCAUGAUCCCACAUUGGUUGCUGUAUACAGUGGAGUGGAGGAGAUUAGAGAGAGCUUUCUUCAGUCCAUUCAAGGGGGGCCUCUGGAUUCAACUAGCUGCUGACUCAUUCACCCAAAUGCCGAGUGACAAGCUUGGUAUGUUAUCGCUCUGUAAAUGAGUGAAUGAAGCAGGAGACUUGUUGAAUCAUAAGCUCCCUCGCUUGGACUGAAGGGAGCUCCCUCGUAUUCGGCGAAUUCCAUAUGAUCAAAU	269	19	138	31	1	51	62	43	0	0	19	135	31	1	51	62	43	0.001	0.001
	Sap-miR319a-3p	mtr-miR319a-3p,gma-miR319a,gma-miR319b,ptc-miR319a,ptc-miR319b,ptc-miR319c,ptc-miR319d,mtr-miR319b-3p,ctr-miR319,gma-miR319e,lus-miR319b,ppe-miR319a,cme-miR319b,cme-miR319a,atr-miR319a,atr-miR319c,pab-miR319a,pab-miR319b,pab-miR319c,pab-miR319f,pab-miR319g,pab-miR319i,pab-miR319k,pab-miR319l,pab-miR319m,pab-miR319n	UUGGACUGAAGGGAGCUCCC	20	CUUGGUGCAGUUGCUAGCUAGCUAUCCUGGACGGUGACUGUCUUUGAUCGGAUUCUAUGUUAUGCAUAUUCUGUUAAUCACUGUUCUGAGACUGAGAGAGAGCUUUCUUCGGUCCACUGGAUGGGUGUUAUAGGAUUUAAUCGGCUGCCGACUCAUUCAUCGCAAAUACCGGUUGAGAGCACGGGAGAUCGUUACCCGGUAAAUGAGUGAAUGAAGCGGGAGACUGGCUAGAUCUUAGACCCUCUAUAAUUGGACUGAAGGGAGCUCCCUCUUGAGCAGCCAAACCCCUAAUUUGACAUA	269	41	1	4	37	42	0	0	0	33	41	1	4	37	42	0.001	0.001	0.001	33
	Sap-miR319b	vun-miR319b,mes-miR319h	CUUGGACUGAAGGGAGCUCCU	21	UGUUAUAUAGUUUGAAGUGUUGGCAUUUCCUGGAAUUUAUGUUGAUCGUGGCGCCAUAAUAGAGGCUCGGUGGAUAGGGGAAGAUGGGGGCUGGAGAGAGCUUCCUCCAGUCCACUCAUGGAUGGCUUAGGGGUUGAAUUGACUGCCGACUCAUUCAUUCAAGCACCUAGUAGAAGCUGGGGCGGAGAGUUUGUCUACUGGCGUCUGAGUGAAUGAAGCGGGAGUCAAUUCCUUCCCCUCUUCUCCAUGCUUGGACUGAAGGGAGCUCCUUCUUUCUACCUAUAACUCCAUGGCUAGAAU	270	141	95	2	0	0	60	47	27	6	140	95	2	0.001	0.001	60	47	27	6
	Sap-miR319c_1	ath-miR319c,pvu-miR319c,rco-miR319d,aly-miR319c-3p,aly-miR319d-3p,mes-miR319g,sly-miR319c-3p	UUGGACUGAAGGGAGCUCCUU	21	GUUAUAUAGUUUGAAGUGUUGGCAUUUCCUGGAAUUUAUGUUGAUCGUGGCGCCAUAAUAGAGGCUCGGUGGAUAGGGGAAGAUGGGGGCUGGAGAGAGCUUCCUCCAGUCCACUCAUGGAUGGCUUAGGGGUUGAAUUGACUGCCGACUCAUUCAUUCAAGCACCUAGUAGAAGCUGGGGCGGAGAGUUUGUCUACUGGCGUCUGAGUGAAUGAAGCGGGAGUCAAUUCCUUCCCCUCUUCUCCAUGCUUGGACUGAAGGGAGCUCCUUCUUUCUACCUAUAACUCCAUGGCUAGAAUG	270	1	1	2	0	2	1	1	0	0	1	1	1	0.001	2	1	1	0.001	0.001
	Sap-miR319c_2	gma-miR319c,ptc-miR319e,ptc-miR319f,ptc-miR319g,ptc-miR319h,cme-miR319c,cme-miR319d,stu-miR319b	UUGGACUGAAGGGAGCUCCU	20	GUUAUAUAGUUUGAAGUGUUGGCAUUUCCUGGAAUUUAUGUUGAUCGUGGCGCCAUAAUAGAGGCUCGGUGGAUAGGGGAAGAUGGGGGCUGGAGAGAGCUUCCUCCAGUCCACUCAUGGAUGGCUUAGGGGUUGAAUUGACUGCCGACUCAUUCAUUCAAGCACCUAGUAGAAGCUGGGGCGGAGAGUUUGUCUACUGGCGUCUGAGUGAAUGAAGCGGGAGUCAAUUCCUUCCCCUCUUCUCCAUGCUUGGACUGAAGGGAGCUCCUUCUUUCUACCUAUAACUCCAUGGCUAGAAUG	269	1	72	216	73	67	0	0	3	21	1	71	215	73	67	0.001	0.001	3	21
	Sap-miR319f	mes-miR319f,cpa-miR319	AUUGGACUGAAGGGAGCUCC	20	AAGCAACUCCUUCCGCUUGCUUUGGCCGCCCAUUGGACUGAAGGGAGCUCCAGCUGAUGCCACUCUCAGCCAGGAGCUCCAAACAAUGAGUACUUCAAACAUGUAAGAUGGCUCUCCCUCCUGCUUUGCACAGAAAGAUUUAGAUAUUUUCAGGAUUUGUUUAUUCUGCAGGGAAGGAUGUUUGAGAAUGGCACUGUCACCAAAAAAGAUAUGGAACCCUUUCUGCAACUUACACAAGCACCAAUUAGGCAGGAGAAAUGCCCACAAGAGGCAGCACAUUUUCAGAGUUUGAAGUAUUGC	51	10169	8510	8178	6266	6514	6814	6005	6057	6458	9389	7941	7616	5963	6175	6425	5686	5764	6146
	Sap-miR319g	gma-miR319g,gma-miR319l	UUGGACUGAAGGGAGCUCCUUC	22	GUUAUAUAGUUUGAAGUGUUGGCAUUUCCUGGAAUUUAUGUUGAUCGUGGCGCCAUAAUAGAGGCUCGGUGGAUAGGGGAAGAUGGGGGCUGGAGAGAGCUUCCUCCAGUCCACUCAUGGAUGGCUUAGGGGUUGAAUUGACUGCCGACUCAUUCAUUCAAGCACCUAGUAGAAGCUGGGGCGGAGAGUUUGUCUACUGGCGUCUGAGUGAAUGAAGCGGGAGUCAAUUCCUUCCCCUCUUCUCCAUGCUUGGACUGAAGGGAGCUCCUUCUUUCUACCUAUAACUCCAUGGCUAGAAUG	271	9	13	24	13	12	8	8	8	2	9	13	24	13	10	7	8	8	2
	Sap-miR319q	gma-miR319q	UGGACUGAAGGGAGCUCCUUC	21	UUAUAUAGUUUGAAGUGUUGGCAUUUCCUGGAAUUUAUGUUGAUCGUGGCGCCAUAAUAGAGGCUCGGUGGAUAGGGGAAGAUGGGGGCUGGAGAGAGCUUCCUCCAGUCCACUCAUGGAUGGCUUAGGGGUUGAAUUGACUGCCGACUCAUUCAUUCAAGCACCUAGUAGAAGCUGGGGCGGAGAGUUUGUCUACUGGCGUCUGAGUGAAUGAAGCGGGAGUCAAUUCCUUCCCCUCUUCUCCAUGCUUGGACUGAAGGGAGCUCCUUCUUUCUACCUAUAACUCCAUGGCUAGAAUGU	270	16	26	42	23	22	14	16	11	8	16	26	42	23	21	14	16	11	8
MIR393	Sap-miR393-5p	ata-miR393-5p	UUCCAAAGGGAUCGCAUUGAU	21	AAUAAGCCUAUCUUUCCUCCCCCCUCCUCCUCCAUUUCUACAAGGUAAAUCGCUCACCCGAUCAUCCGAAAUUGCCUUCCGCAGUUUCUGGAAUUGAUAUACUCUAAACCCCAGCAAGCUGCGCGCCUCAGCCUAACACUUGUCUAGUGCAGAUGGAUAGUUCCAAAGGGAUCGCAUUGAUCGGAUCGAGCAUAGCUGUGCAGAGGCGAGCUUCCGGAGCCAGUUCUUCAAUCUCAUAAUACGUGCCCCUCGGAUCAUGCGAUCCCUUCGGAAUUUUCCGUCAGCUGCUCUAAUUGAUUC	181	27	29	26	15	7	11	0	4	8	27	29	26	15	7	11	0.001	4	8
	Sap-miR393a	osa-miR393a,sbi-miR393a,mtr-miR393a,ptc-miR393a-5p,ptc-miR393b-5p,ptc-miR393c,mtr-miR393b-5p,bna-miR393,vvi-miR393b,gma-miR393a,vvi-miR393a,sbi-miR393b,rco-miR393,tcc-miR393b,bdi-miR393a,bdi-miR393b-5p,lus-miR393a,lus-miR393b,lus-miR393c,lus-miR393d,cme-miR393a,cme-miR393b,cme-miR393c,mes-miR393a,ppe-miR393b,csi-miR393c-5p	UCCAAAGGGAUCGCAUUGAUC	21	AAUAAGCCUAUCUUUCCUCCCCCCUCCUCCUCCAUUUCUACAAGGUAAAUCGCUCACCCGAUCAUCCGAAAUUGCCUUCCGCAGUUUCUGGAAUUGAUAUACUCUAAACCCCAGCAAGCUGCGCGCCUCAGCCUAACACUUGUCUAGUGCAGAUGGAUAGUUCCAAAGGGAUCGCAUUGAUCGGAUCGAGCAUAGCUGUGCAGAGGCGAGCUUCCGGAGCCAGUUCUUCAAUCUCAUAAUACGUGCCCCUCGGAUCAUGCGAUCCCUUCGGAAUUUUCCGUCAGCUGCUCUAAUUGAUUC	182	7312	7127	7430	2971	2781	2910	636	816	685	6739	6727	6966	2881	2688	2828	613	780	657
	Sap-miR393b-3p	csi-miR393b-3p	UCAUGCGAUCCCUUCGGAAUU	21	GCCUAUCUUUCCUCCCCCCUCCUCCUCCAUUUCUACAAGGUAAAUCGCUCACCCGAUCAUCCGAAAUUGCCUUCCGCAGUUUCUGGAAUUGAUAUACUCUAAACCCCAGCAAGCUGCGCGCCUCAGCCUAACACUUGUCUAGUGCAGAUGGAUAGUUCCAAAGGGAUCGCAUUGAUCGGAUCGAGCAUAGCUGUGCAGAGGCGAGCUUCCGGAGCCAGUUCUUCAAUCUCAUAAUACGUGCCCCUCGGAUCAUGCGAUCCCUUCGGAAUUUUCCGUCAGCUGCUCUAAUUGAUUCGUGUA	270	2	3	2	3	5	2	2	1	1	2	3	2	3	5	2	2	1	1
	Sap-miR393h	gma-miR393h,gma-miR393i,gma-miR393j,gma-miR393k,csi-miR393b-5p	UUCCAAAGGGAUCGCAUUGAUC	22	AAUAAGCCUAUCUUUCCUCCCCCCUCCUCCUCCAUUUCUACAAGGUAAAUCGCUCACCCGAUCAUCCGAAAUUGCCUUCCGCAGUUUCUGGAAUUGAUAUACUCUAAACCCCAGCAAGCUGCGCGCCUCAGCCUAACACUUGUCUAGUGCAGAUGGAUAGUUCCAAAGGGAUCGCAUUGAUCGGAUCGAGCAUAGCUGUGCAGAGGCGAGCUUCCGGAGCCAGUUCUUCAAUCUCAUAAUACGUGCCCCUCGGAUCAUGCGAUCCCUUCGGAAUUUUCCGUCAGCUGCUCUAAUUGAUUC	182	183	313	293	165	359	104	1066	1036	702	176	304	290	162	352	102	1027	1004	684
MIR394	Sap-miR394a_1	ath-miR394a,ath-miR394b-5p,osa-miR394,sbi-miR394a,zma-miR394a-5p,zma-miR394b-5p,ptc-miR394a-5p,ptc-miR394b-5p,vvi-miR394b,sbi-miR394b,ghr-miR394b,ghr-miR394a,aly-miR394a-5p,aly-miR394b-5p,ahy-miR394,gma-miR394b-5p,gma-miR394a-5p,csi-miR394a,tcc-miR394a,tcc-miR394b,gma-miR394c-5p,bdi-miR394,ssl-miR394,gma-miR394d,gma-miR394e,gma-miR394f,bna-miR394a,bna-miR394b,mes-miR394a,cca-miR394,lus-miR394a,lu…	UUGGCAUUCUGUCCACCUCC	20	AGCCUCACCAAUCAACCCUUCCCUUCAAGAAGGGGGAGUUAUUGGGCUCCCAAAAGCUCACUCAGGAAAAAGAACAGGAAAAAAAAAAUGCGAGCUCGAUCAAAUGAGAGAGCUUUCGGGAAGAUGUCUUUUGGUUUUCUUGGUAAUCAUAAGCUGGUUCAUGGGGGUUUGUCAAAGGGUUCCUAACAAAGUUCAUUGGCAUUCUGUCCACCUCCGUUCAUUUAUACCUCGCCCCCCUUCUCUCUCUCUCUAUGUGUAUGUAUAUAUAUCUCUCUCUCUAUGCGGUGUGAUCGGAGGUGG	215	11232	11486	9084	10299	9593	10349	3294	4264	3743	10189	10493	8487	9453	8787	9533	3176	4101	3617
	Sap-miR394a_2	vvi-miR394a,vvi-miR394c,mes-miR394c	UUGGCAUUCUGUCCACCUCCAU	22	AAAGCUAGCUACUGCUAUCCGUGUUCUAUCUAUAGACUGACAGAGCUUUUGGGAAGAUUUUUCUGCUACUUCUUUGGUCAUCAUAAGGUUGUGUUCAUGGGGGGCUUGUCAAAGGGUUCCUAACAGUACCGUUCAUUGGCAUUCUGUCCACCUCCAUUCACCCUCCGCUCACGCCCAUCUGUCUGUGCACUACAACCGGAGGUGGGCAUACUGCCAACAGAGCUUCGUUAGGUUCUCUUUGUGAAACCCUUCGUGAUGCAUGUUGUUAAUCUUUCUCUUGCCGGCUUGAUCGGUUCCCUC	157	20534	12206	18599	24127	45683	14619	49025	59347	55885	17618	11123	16199	20184	33556	13045	35412	40580	38900
MIR395	Sap-miR395o	osa-miR395o	AUGAAGUGUUUGGAGGAACUC	21	UAAAUCACCACCAAUGAGCCAGUUCCCAGCAUUCUUGAUAGCUUCCUCAACAUAAGGAAGACCUGGCACUGUGGUCCCCCAAGUUCGGGCUAUGCGUUCUUCCUUGGGGUGUUUGUAGAUCUCAAUGUUGCUGAGGAUGGCGACGGGGUUGUUGUCGGAGCCGACGAGGGCGACCUUCUUGGAGUCGCCGGUCCUCUGCCUCUGCGAGUCGUCGAUGGCAAGGAUGAUCGGCACAGACAUGUUGACCACCGACCCGUCAUCGAGUCGGAGGGAGUUAAAAUGAAGUGUUUGGAGGAACUC	300	12913	6342	10457	13987	14600	9203	17278	14434	16528	11683	6033	9646	12502	13006	8541	15181	12953	14539
	Sap-miR395p-3p	bdi-miR395p-3p	UGAAGUGUUUGGAGGAACUC	20	UAAAUCACCACCAAUGAGCCAGUUCCCAGCAUUCUUGAUAGCUUCCUCAACAUAAGGAAGACCUGGCACUGUGGUCCCCCAAGUUCGGGCUAUGCGUUCUUCCUUGGGGUGUUUGUAGAUCUCAAUGUUGCUGAGGAUGGCGACGGGGUUGUUGUCGGAGCCGACGAGGGCGACCUUCUUGGAGUCGCCGGUCCUCUGCCUCUGCGAGUCGUCGAUGGCAAGGAUGAUCGGCACAGACAUGUUGACCACCGACCCGUCAUCGAGUCGGAGGGAGUUAAAAUGAAGUGUUUGGAGGAACUC	300	0	0	0	0	0	0	1	2	1	0.001	0.001	0.001	0.001	0.001	0.001	1	2	1
MIR396	Sap-miR396-3p	ama-miR396-3p	AAGCUCAAGAAAGCUGUGGGA	21	CCCUUCCCCCCCCCCCCCGUCUCUCUCUCUCUCUGUCUCUCUCUCUCUAUAGUUCUACAUCUGCAGGAGAUGGAGGGAGGGAGGGUUAAAGAGAGAAGACAUGGAAGGUGUUGAGAUGUGAACUUGGGAGCCCGGGCCAUGCUCUUCCACAGCUUUCUUGAACUUCUCUUUUUCCCCUCUUCUUCGUUGUUGCUUGUUGCUGCAAGUCUUGUGGAUGAUAAGCAGAAGAGAGCCCCAGCACCAGCUCGGAAGCUCAAGAAAGCUGUGGGAAAACAUGGCGAGUUUCGGGGCUCGGUUCCC	270	293496	252920	234793	315151	327219	325855	611858	604406	629678	90728	86802	83475	92828	95918	92278	190002	183450	185366
	Sap-miR396a-3p_1	ath-miR396a-3p,mtr-miR396b-3p,aly-miR396a-3p,csi-miR396b-3p,gma-miR396i-3p,sly-miR396a-3p	GUUCAAUAAAGCUGUGGGAAG	21	UCCCUCAUCUCCUCCACAUAACCCCAUCGACAUUCGCUCUCUUGGUCGGAGUCUCUGCAUAUCGAUCGGUCGGCAGCUGAAGGAAGGGGUUAGAAGAGUGGCCCUCUUUGUUGCCUUCCACAGCUUUCUUGAACUGCUCAUAUGGUCACGGAGUUGGGAUCUUGAUGGUUAAUUAUCCACCCGGAGUUGUUCGCAGUUCAUGGACCCCCCCGGGGAGUUAAUCGCAGGAACCUUCCGUGCACCCCGGCGGUUCAAUAAAGCUGUGGGAAGCUACAGAAAGGACCAAGAGAUUAGAUUUUA	270	7115	6465	6976	3479	3501	3580	4	5	7	6737	6130	6623	3003	3046	3091	4	5	7
	Sap-miR396a-3p_2	gma-miR396a-3p	UUCAAUAAAGCUGUGGGAAG	20	AUCGAUAAACUGCCCUACUCGCCGUUCGCCGGGUGUCUACUCACUUAUGUGUACGUUUUGUCUCGAUCUGUCCCAGAAAGGCCGGGGAAGGAAAUAGUGGUCCCUCUUUGUUGCCUUCCAGCAGCUUUCUUGAACAUGCUUUGUUGAUAUGGAAGCAAUCUGGAUCUCGAUUAGUAGUACUCAAAUCAUGCGGCUUCAUGAGCCUGAAAAGCGCCAUUAAUGGCAGGAUCUUUCCUUGUUCUCUUGCGGUUCAAUAAAGCUGUGGGAAGUCACACGAAAAGGGCUAAGAAAAAAUGUUUC	269	78	63	92	580	660	565	294	348	279	73	62	89	570	610	535	270	336	273
	Sap-miR396a-3p_3	osa-miR396a-3p,osa-miR396b-3p	GUUCAAUAAAGCUGUGGGAA	20	CACCUAACCCGGAUCGAUAACUGCCUACUCCGUUCGCCGGUGUCUACUCACUUAUGUGUACGUUUUGUCUCGAUCUGUCCCAGAAAGGCCGGGGAAGGAAAUAGUGGUCCCUCUUUGUUGCCUUCCACAGCUUUCUUGAACUGCUUGUUGAUAUGGAAGAAUCUGGAUCUCGAUUAGUAGUAUCAAAUCAUGCGGGUUCAUGAGCCUGAAAGCGCCAUUAAUGGCAGGAUCUUUCCUUGUUCUCUUGCGGUUCAAUAAAGCUGUGGGAAGUCACAGAAAGGGCUAAGAAAAAAUUUUCAG	269	155	4	5911	150	7160	132	5903	5666	6246	153	4	5627	147	6732	131	5634	5412	5968
	Sap-miR396a-3p_4	pab-miR396a-3p,pab-miR396d,pab-miR396e	CUCAAGAAAGCUGUGGGAAA	20	UGGUCCAUCAUCGAGAACUUCUCUCUCUCUGUCUCUCUCUCUCUAUAGUUCUACAUCUGCAGGAGAUGGAGGGAGGGAGGGUUAAAGAGAGAAGACAUGGAAGGUGUUGAGAUGUGAACUUGGGAGCCCGGGCCAUGCUCUUCCACAGCUUUCUUGAACUUCUCUUUUUCCCCUCUUCUUCGUUGUUGCUUGUUGCUGCAAGUCUUGUGGAUGAUAAGCAGAAGAGAGCCCCCAGCACCAGCUCGGAAGCUCAAGAAAGCUGUGGGAAAACAUGGCGAGUUUCGGGGCUCGGUUCCCCAG	269	722	657	664	165	167	186	188.5	211.5	208.5	718	650	663	164	166.5	184	186.5	209.5	204
	Sap-miR396a-5p	ath-miR396a-5p,osa-miR396a-5p,osa-miR396b-5p,sbi-miR396b,sbi-miR396a,sof-miR396,gma-miR396a-5p,zma-miR396b-5p,zma-miR396a-5p,ptc-miR396a,ptc-miR396b,mtr-miR396b-5p,ghr-miR396a,ghr-miR396b,vvi-miR396d,vvi-miR396c,lja-miR396,aqc-miR396a,aly-miR396a-5p,csi-miR396a-5p,csi-miR396b-5p,bgy-miR396a,bcy-miR396a,tcc-miR396a,tcc-miR396b,bdi-miR396d-5p,bdi-miR396c-5p,ssp-miR396,gma-miR396i-5p,aau-miR396,amg-…	UUCCACAGCUUUCUUGAACUG	21	AGUCCAGUUUUACUUCUCCUCCACAAUUCCUUUAGGCCCCGCUUCUCAACCUCUUUACCUAUCCAUCCGUCCACCUAUUCCAUCCACUCCUCUCCAUCUCCCUCAUCUCUCCACAUAACCCCAUCGACAUUCGCUCUCUUGGUCGGAGUCUCUGCAUAUCGAUCGGUCGGCAGCUGAAGGAAGGGGUUAGAAGAGUGGCCCUCUUUGUUGCCUUCCACAGCUUUCUUGAACUGCUCAUAUGGUCACGGAGUUGGGAUCUUGAUGGUUAAUUAUCCACCCGGAGUUGUUCGCAGUUCAUGG	233	64	62	97	20	25	31	16	10	12	63	62	97	20	25	31	16	10	12
	Sap-miR396b	vvi-miR396b	UUCCACAGCUUUCUUGAACU	20	AGUCCAGUUUACUUGCUCCUCCACAAUUCCUUUAGGCCCCGCUUCUCAACCUCUUUACCUAUCCAUCCGUCCACCUAUUACCAUCCACUCCUCUCCAUCUCCCUCAUCUCCUCCACAUAACCCCAUCGACAUUCGCUCUCUUGGUCGGAGUCUCUGCAUAUCGAGUCGGUCGGCAGCUGAAGGAAGGGGUUAGAAGAGUGGCCCUCUUUGUUGCCUUCCACAGCUUUCUUGAACUGCUCAUAUGGUCACGGAGUUGGGAUCUUGAUGGUUAAUUAUCCACCGCGGGUUUGUUCGCAGUUC	235	2255	1665	1958	1495	1247	1313	359.5	523.5	400	2210	1640	1912	1476	1222	1293	353	518	397
	Sap-miR396b-3p	ath-miR396b-3p,aly-miR396b-3p,bra-miR396-3p	GCUCAAGAAAGCUGUGGGAAA	21	AAGAGAGAAGAUAUGGAAUGGGGGGAUAAGCUUGGGAGUCCGAGUCAUGCUCUUCCACAGCUUUCUUGAACUUCUCAUUUCCCUUAUCUCUUUUGUUUUUUUGGUCUCCCCAAAAGUUUGAGAAAGGCUUUCACAGAAGCUCAAGAAAGCUGUGGGAAAGCAUGGCGAAUUUCGUGACUCGAUCCCGUGACCCCUCCCUCGCCGAGAAAAUCCCAUGAAGAAGAAGGGAGAGUUGACAUUCAGAGGGAAUGUACUGAUCCUCCGACAAGGUGUGGUGUGGAGAUCUGCAGCCGAGAAAUA	159	180357	179114	176264	509906	446482	526758	898116	832374	822837	74817	74913	74113	171758	165400	172242	281169	267384	265125
	Sap-miR396b-5p	ath-miR396b-5p,osa-miR396c-5p,sbi-miR396c,gma-miR396b-5p,ptc-miR396c,ptc-miR396d,ptc-miR396e-5p,mtr-miR396a-5p,bna-miR396a,pta-miR396,gma-miR396c,aqc-miR396b,zma-miR396e-5p,zma-miR396f-5p,ccl-miR396,rco-miR396,aly-miR396b-5p,bgy-miR396b,bcy-miR396b,tcc-miR396c,tcc-miR396e,bdi-miR396e-5p,gma-miR396k-5p,cca-miR396a-5p,lus-miR396b,nta-miR396b,nta-miR396c,mdm-miR396c,mdm-miR396d,mdm-miR396e,cme-miR39…	UUCCACAGCUUUCUUGAACUU	21	UUCCACAGCUUUCUUGAACUUCUCAUUUCCCUUAUCUCUUUUGUUUUUUUUGGUCUCCCCAAAAGUUUGAGAAAGGCUUUCACAGAAGCUCAAGAAAGCUGUGGGAAAGCAUGGCGAAUUUCGUGACUCGAUCCCGUGACCCCUCCCUCGCCGAGAAAAUCCCAUGAAGAAGAAGGGAGAGUUGACAUUCAGAGGUGGGUGACAACUCUAAUUCCACAAAUUCAAGAUAAGGUAAUAGCCUCGGAAAGUUUUCGUCGCAUAAUUGUGUCAAGUCCCCAGAAAUCCGGGUGGAUUUGCAGU	21	28180	16347	26790	917	13660	3	80407	27213	12053	22701	14421	21933	911	12056	3	49336	22423	10891
	Sap-miR396g-3p	zma-miR396g-3p	GUUCAAGAAAGCUGUGGAAGA	21	GUAGAAGAUCAUAAUGAUCUAAAUGCUAACAUGCGCGGUGAAGUCCCCCUCGUCUUCCAAUUCCCUUCUCAUUUCCACGCAUCUCCCCAUCAUGGAUGUCGACUCUCCUACUUGCUCUCUUUGCCGGAGAUUCCUCCGCUGGGGAACCGAGCCCCGAAACUCGCCAUGUUUUCCCACAGCUUUCUUGAGCUUCCGAGCUGGUGCUGGGGGCUCUCUUCUGCUUAUCAUCCACAAGACUUGCAGCAACAAGCAACAACGAAGAAGAGGGGAAAAAGAGAAGUUCAAGAAAGCUGUGGAAGA	300	10	15173	18930	34768	19263	32395	1590	18044	23578	10	13461	16388	27131	16570	25452	1560	15746	19772
	Sap-miR396h	gma-miR396h	UCCACAGCUUUCUUGAACUG	20	AAGCCUAAUACAACCUCUCCUUCCACCGCUCCUUAAGCCCCUCUUCAUCUAACCUAUCUCUCCAUCUCUGUAUAUUAGUAGCCUCUUUGUUCCUCACCUCCUCCACCUAACCCGGAUCGAUAACUGCCUACUCCGUUCGCCGGUGUCUACUCACUUAUGUGUACGUUUUGUCUCGAUCUGUCCCAGAAAGGCCGGGGAAGGAAAUAGUGGUCCCUCUUUGUUGCCUUCCACAGCUUUCUUGAACUGCUUGUUGAUAUGGAAGAAUCUGGAUCUCGAUUAGUAGUAUCAAAUCAUGCGGGU	246	193	190	257	235	214	241	1755	1295	1265	193	187	257	235	211	239	1710	1285	1250
MIR398	Sap-miR398a-3p	stu-miR398a-3p,sly-miR398a	UAUGUUCUCAGGUCGCCCCUG	21	ACUCAUGAUCUUCGCCGCUAUCGGUAGAUCAGCGGGCGUCGAAGGUGGAUGGGCCCCACUGGGACGACAUGAGCACACAUGUGGGCUUGCGUCUGGGACUCGGGGAAAUCGGCAUUUCCUCGGACCACAUGUCCUGCUUGAUGUAUGUUCUCAGGUCGCCCCUGCCGGGCUUUCCUCCACCUUGGAGCUGCCCGUGCAGCCCUUUCGGGUUGCCACCUUCUCUGGGCUCCAAACGGCCUUCCCCUUUAGUCCUGACUGCUCGUACACUGGCUCACUGGCACAUCCAGACUGCUUUUCCUG	164	606	450	451	627	690	633	428	530	482	599	448	450	615	677	628	426	526	480
	Sap-miR398b	osa-miR398b,ptc-miR398b,ptc-miR398c-3p,mtr-miR398b,mtr-miR398c,vvi-miR398b,vvi-miR398c,aqc-miR398b,rco-miR398b,tcc-miR398a,gma-miR398c,bdi-miR398a,cca-miR398,lus-miR398a,nta-miR398,ppe-miR398a-3p,mdm-miR398b,mdm-miR398c,cme-miR398a,gma-miR398d,mes-miR398,csi-miR398b-3p	UGUGUUCUCAGGUCGCCCCUG	21	CUCACUCAUGAUCUUCGCCGCUAUCCGGUAGAUCAGCGGCGUCGAAGGUGGAUGGGCCCCACAGGGACGACAUGAGCACACAUGUGGGCUUGCGUCUGGACUCGGGGAAAUCGGCCAUUUCCUCGGACCACAUGUCCUGCUUGAUGUGUUCUCAGGUCGCCCCUGCCGGGCUUUCCUCCACCGUGGAGCUGCCGUGCAGCCUUUCGGGUUGCCACCUUCACUGGGCUGGGGAGGUACAGCUCUCUUCCUGUAAAACGUUGACGCAACAUUUUCUUUUUUCCUUGUUGUUUUCGCGGGUAU	165	142042	170818	146545	34627	32920	34171	21798	24536	26083	66856	73804	68294	26929	25503	26511	18440	20344	21360
MIR4995	Sap-miR4995	gma-miR4995	AGGCAGUGGCUUGGUUAAGGG	21	AGAACAUGAAACCGUAAGCUCCCAAGCAGUGGGAGGAGCCCGGGGCUCUGACCGCGUGCCUGUUGAAGAAUGAGCCGGCGACUCAUAGGCAGUGGCUUGGUUAAGGGAACCCCCCGGAGCCGUAGCGAAAGCGAGUCCUCAUAGGGCAAUUGUCACUGCUUAUGGACCCGAACCUGGGUGAUCUAUCCAUGACCAGGAUGAAGCUUGGGUGAAACUAAGUGGAGGUCCGAACCGACUGAUGUUGAAGAAUCAGCGGAUGAGUUGUGGUUAGGGGUGAAAUGCCACUCGAACCCAGAGCUA	107	50	33	38	8	8	13	3	1	3	50	33	38	8	8	13	3	1	3
MIR530	Sap-miR530a	ptc-miR530a,tcc-miR530b,lus-miR530a,lus-miR530b,htu-miR530,cme-miR530a,mes-miR530a	UGCAUUUGCACCUGCACCUU	20	UGCAUUUGCACCUGCACCUUAAUAACCAACCCAUGCUUAUUGCUUUCCGGGUCUUCUUCUUUCCUUUGGGAUUUUGCGAUCUGCGCAAAAACCCUCCACAGCUCUCUCUCUCUCUCUCUCUCUCUCUCUCUCUAUGUUAUGUAUAUAUAUAUAUAUGGAUUGGUUAACAAAUUCGUGUUGGAUCUGUGUAUGCCUGGGAAAGGCAGUUUGCAUACGUUGAGGUGCAGGUUCAGAAGUAAAGAUAAUUAAUUGCUCGGAUCCGCUACUGUCAUGCUGUUUACGCUCUCCAUGCUAUAUAGU	20	1	2	2	1	5	4	24	7	9	1	2	2	1	5	4	24	7	9
MIR535	Sap-miR535	tcc-miR535	UGACAACGAUAGAGAGCACGC	21	UGGAUCUUGCCUAAUUGAAGCCACAUCGCAUGACAACGAUAGAGAGCACGCUUGUACACAGCCAUGUGUCCAGCAUGGAUGCCGACUAGUGUGCUCUCUCUCGUUGUCAUAUACGAUAUUCCAAUACUUUGCUAAUAAUCUAGAUUAAGAAAUCUUGACAUCCCAAUAUAUACAGCUGCCUGGGCAGAAAGUCCUUCCACCUUCAUCCACAUCAAGGACGCGGUCUCCAUGGAAUGCAACCUCGCUCCACUCUCCCUUUGGGCCGAAAAUGUAAAGAGGGGAAAGAUCUUCCGAUGAGAU	51	2	0	1	2	4	1	1	7	3	2	0.001	1	2	4	1	1	7	3
	Sap-miR535a	ppt-miR535a,ppt-miR535b,ppt-miR535c,osa-miR535-5p,ppt-miR535d,vvi-miR535a,vvi-miR535b,vvi-miR535c,rco-miR535,pab-miR535e,mdm-miR535a,ppe-miR535a,cpa-miR535,atr-miR535,pab-miR535a,pab-miR535c,pab-miR535d	UGACAACGAGAGAGAGCACGC	21	GUUAGUAUACACGAUAGCUAAUAGCUGUAAUAGAAUUAAAACCUAUCGCAUUAUGAGAUGCACUGUUUGUGCUUGCAAGUAUGAAGGAUUUGGGCCACUGUACUUUGGGAUAUUGAGAUUUCUUUAUCUUGGUUAGAUAGGUUUGCUCAAUUGUGUGUGUUGAGCUUCGUGCAAUCUUGAAUCUCCAUUCUGUUUUAGUUUCUCUUGUUCAGGUUAUUAUUGAUAAGGCUUUGGAUAAUUAUCAUAAUCUGACAACGAGAGAGAGCACGCUCAGUCAGCAUCCAUGCUGGGAUGUAUGGU	270	14949	6364	8323	11404	22323	5441	13883	17778	21637	13289	6074	7778	10425	18880	5205	12512	15580	18396
MIR5368	Sap-miR5368	gma-miR5368	GGACAGUCUCAGGUAGACA	19	AACGAUCUGGGCACUGUCUCGGAGAGAGACUCGGUGAAAUAGACAUGUCUGUGAAGAUGCGGACUACCUGCACCCGGACAGAAAGACCCUAUGAAGCUUUACUGUUCCCUGGGAUUGGCUUUGGGCCUUUCCUGCGCAGCUUAGGUGGAAGGCGAAGAAGGCCUCCUUCCGGGGGGGCUCGAGCCGUCAGUGAGAUACCACUCUGGAAGAGCUAGAAUUCUAACCUUGUGUCAGGACCUACGGGCCAAGGGACAGUCUCAGGUAGACAGUUUCUAUGGGGCGUAGGCCUCCCAAAGGGUA	268	103	84	80	25	24	25	17.5	21	25	101	84	80	24	24	25	17.5	21	25
MIR5532	Sap-miR5532	osa-miR5532	AUGGAAUAUAUGACAAAGGUGG	22	UGAUCCGCUGCCGAACUAUUCCAAUUCCAAGAGCUCGGAUCGAAUCGGCAUAUCAAUAUCAAUUCGAUCCGAGCUCUCUUAUUGAAUUGCUCAUUCAAUGAGUAUUCUCAAUAUUAUGCCUUGAAGAGGACUCGAACCUCCACGCUCUUUAGCACGAGAUUUUGAGUCUCGCGUGUCUACCAUUUCACCACCAAGGCAUCUUGAAACUGAAUCGUAUUCCAUGAAUAUGAUAUCUAUCUAGUGUGAUGUAUGGAAUAUAUGACAAAGGUGGAGUAUUGGAGUAUUUCUAUUGAUCGGUCA	271	0	0	1	0	0	0	0	0	0	0.001	0.001	1	0.001	0.001	0.001	0.001	0.001	0.001
MIR6300	Sap-miR6300	gma-miR6300	GUCGUUGUAGUAUAGUGG	18	UUGUAAAAAGAUUCAUUUGCUAGGCUCAUCAAGGUCGUUGUAGUAUAGUGGUGAGUAUUCCCGCCUGUCACGCGGGCGACCCGGGUUCGAUCCCCGGCAGCGGCGCAAUUACGCUUUUUGGCCAGCUUGGCCAUUAAAUUGACCGACAUACGUCAGCCUCAGUCGUCCGAUGGUUUUUCUUCGACGACCAAAAUACACUAUUGUUCGAAUAUAAAAUAAGUAUAGGAAAUUCUUUUUUUUUAGCGGGACGUUGCCUGGCGAGACUACAAGAUCCUAUUUUGAUAGAGCUUCCAUCCUCGG	51	205	186	154	150	102	124	158	140	164	205	184	154	149	100	121	155	140	162
MIR8051	Sap-miR8051-5p	stu-miR8051-5p	UAGUAUGGUAGAAAGAUUCA	20	AUAGUACAACUUGUUACAUUACAAUAAUAGCUAGUAUGGUAGAAAGAUUCAUAUAUUUCUUUCUACCAUACUAGCUAUCGGAUCUCAAAGAAUACUAUACCGCCGAUUCUAGUCCGCCAAUUUCAUUUAAGACGCGAGAUGAAAAUCCUUUUUUUUCUUCAAUCAUUGACUAAGAAAAGAAGUCAAGUUUGAUUCAAAUCAAUCACUUUGACUGACUGUUUUUACGUAAAUUAUAAGUAAAAAGGCAGUAGGAACUAGAAUGAAAAGUGCAGUAGCAAUAAAUGCGAGAAUAUUUACUUC	51	41	33	25	39	35	41	2	2	7	41	33	25	39	33	39	2	2	7
MIR827	Sap-miR827	mdm-miR827	UUAGAUGACCAUCAACGAACA	21	UCUGGGUUUGCAGCAGCGGAGAUGUUCGCUGUUGGUCCACCUACUCUGCUCAGCCGCUCUUUCUCCGGUGGCGCCAUGGCGAGAUUGUUCGACCUCGUCACGGCUCAUCGACAGUGGAUUAGUAAUCCGAGUGAGCGACACCGAGGGGUCACAGGCGGAUUAGAUGACCAUCAACGAACACAUCCGCCCCAACUGCAAUCAAUCCUUCAAAUCACACGUUUUUUUCGCCCUAUCGCCCUUCUGGGUGUCAUCCACGUUGCCCCUUACACUUGGUAGAGUGGCUAGUUUGAUUGUUUUAUC	180	261	247	257	293	330	343	199	190	198	259	246	256	293	328	342	199	190	198
MIR828	Sap-miR828-3p	aly-miR828-3p	AGAUGCUCAUUUGAGCAAGCAA	22	AGAGGAGAGAGUUAGAAGAAGGGUUUUGUGAGUCCUCUUGUAAUAUCUCUUGCUCAAAUGAGUAUUCCAGUUACAGCAGCAUGAAGCCCGAUGCAAGGCCAAGAGCCUGUCCUGUCGUCAGGAAGGCUUUCUGACAACACUCUCUUCGCCGAGGGUUUCGACUGACUUGACCGGGAGCUGCUGAAGCUGCUGUGACAUGAGAUGCUCAUUUGAGCAAGCAAUGUUAUGGGAGGAGGCUCUUUUUUUUUUUUUUCUUUUUAUCGGCUGUGUUGUACCAGAGGCUAGAGCCUUCCCGAGCAG	221	0	0	1	0	0	0	0	0	0	0.001	0.001	1	0.001	0.001	0.001	0.001	0.001	0.001
MIR8620	Sap-miR8620	esi-miR8620	UCCUGCAGCCGCUGCCGC	18	UCCUGCAGCCGCUGCCGCCCAAGGAGGCUGCAGCGAGGGCGAAGGAGUCAGCCAAGGACAUACUUAAUGUGAAGGAGCUGAUCGACAAGAAGGAAUGGCCAUACGUGCAGAAUGACCUCCGACUCAGGGCCGAGUACCUCCGCUAUGACAUCAACACCAUCAUCGCCACCAAGCCCAAGGACGAAAAGAAGAGCCUAAGGGAGCUCACCGGGAAACUCUUCCAAACCAUCAGCGAGCUGGACCACGCAGCAAAGAUCAAGAGUACUCCAGAGGCAGAGAAGUACUAUGCUGAGACAGUAU	18	500	497	510	243	190	188	129	148	124	487	493	504	243	186	187	128	147	121

## Sheet: Data S2
miRNA name	Chromosome	Strand	miRNA sequence (5'-3')	Length (nt)	Sequence (star)	Pre-miRNA sequence	Free energy of the thermodynamic ensemble for folded structures of Pre-miRNA (%)	Start	End	miRNA reads									Normalizated read count (TPM)
										LCK_a_count	LCK_b_count	LCK_c_count	LT1_a_count	LT1_b_count	LT1_c_count	LT2_a_count	LT2_b_count	LT2_c_count	LCK_a_TPM	LCK_b_TPM	LCK_c_TPM	LT1_a_TPM	LT1_b_TPM	LT1_c_TPM	LT2_a_TPM	LT2_b_TPM	LT2_c_TPM
Sap-nmiR1	isoform_100151	+	AACUUAUUAGAUACCAGAA	19	GAAUCGUGGUAUCUAAUAAGUUUUUCUG	UAGUAGGUAGAACUUAUUAGAUACCAGAAUCGUGGUAUCUAAUAAGUUUUUCUGAUCACCCUCUU	-26.02	130	194	788	854	618	216	271	256	22	27	37	783	850	610	216	269	256	22	27	37
Sap-nmiR2	isoform_148861	-	CUUCCUUCUGCAGCGGGAAAUGUC	24	UUUCAUUGCACUCGGAAGGGGUGC	UGGUGACUUUCAUUGCACUCGGAAGGGGUGCCAGCCUAAGAAAAAAAAAAAAAAAAAAAAAAAAAAAAAACCCUAUCCGUACUCUGCGUUGAUACCACUGCUUACUAGUAAGCAGUGGUAUCAACGCAGAGUACGGGGACGGCCACUAACAUCACUCUUGCCACAACCUGAACGCCAGCCCCUCAAGCGUCUCCCCCCAAAAUCUUCUCUCGUCUUCCUUCUGCAGCGGGAAAUGUCGCUC	-88.63	4041	4281	28	42	56	12	0	1	25	12	20	28	42	56	12	0.001	1	25	11	20
Sap-nmiR3	isoform_149053	+	AGGAGAAAGUCUUUGCAACC	20	UGCUGAGACAUGCGCCUAA	AACCCUCGUUUUGUGUUGCUGAGACAUGCGCCUAAGGAGAAAGUCUUUGCAACCGAAGUGAGCCGAGGAGCCGAGUGACGUGCCAGCGCUACUAAUUGAGUGCCAGCACGUAGCUGUGCUGUCAGUAAGAAGCGAACAUCAGGCAAUCUGGGGGUG	-54.44	179	334	44	59	45	11	0	10	0	10	0	43	59	44	11	0.001	10	0.001	10	0.001
Sap-nmiR4	isoform_155263	+	GGGAAUGGGCGGCUUGGGAGGAUA	24	UUCCCAAGACCGCCAUUCCGA	AGGGGAAAGGGAGUAUCAGAGCUUGCUGGGAGUUGUGGGGAAUGGGCGGCUUGGGAGGAUAUUUCCAGUCGGUCGCGGGUGAAAUUUUCCCAAGACCGCCAUUCCGAUGAUCCCAAGUGGUUCACUCCCUUUCCCUG	-76.59	102	238	0	13	18	0	0	0	0	0	0	0.001	13	18	0.001	0.001	0.001	0.001	0.001	0.001
Sap-nmiR5	isoform_174992	+	UACGCAGGAGGGAUGACGCCGCCG	24	CGGCAUCAUGCCUCCUGCAUAGGU	GAAGGUUGUCUUACGCAGGAGGGAUGACGCCGCCGUCGCCGGUGUCCAUUCGUACAGGAGAACUUGCCGUCUGGCUAGCCAGGAGGAUAGGCUGACGGCGGCAUCAUGCCUCCUGCAUAGGUGACCUUA	-72.39	141	269	211	250	223	120	100	109	122	174	132	208	247	222	120	99	107	118	170	131
Sap-nmiR6	isoform_178129	-	GUAAGCAGUGGUAUCAACGCAGA	23	GCGUUGAUACCACUGCUUACUA	UGAAGCUUUACUGUUCCCUGGGAUUGGCUUUGGGCCUUUCCUGCGCAGCUUAGGUGGAAGGCGAAGAAGGCCUCCUUCCGGGGGGGCUCGAGCCGUCCUGCGUUGAUACCACUGCUUACUAGUAAGCAGUGGUAUCAACGCAGAGUACAGUGGAAGUUUUU	-85.98	408	568	6325	5788	7166	2552	2932	2476	914	1212	1300	6155	5639	6943	2521	2892	2448	903	1196	1276
Sap-nmiR7	isoform_195385	-	GCCGGGUUAAUCGUAUUCUGG	21	AAUGCACGACUUAUCAAUUUAUCCGGCAAA	GGCUCAAGAUCAGCCUCAUGAAAACCUUAUAUUCCCUGAGGAGGUUCUACCCCGUGGAAACGCUCUUUAAUGGAACUUUAGCUUUAGCUGGUCGUGAUCAAGAAACCACCGGUUUCGCUUGGUGGGCCGGGAAUGCACGACUUAUCAAUUUAUCCGGCAAACUUUUGGGGGCUCAUGUAGCCCAUGCCGGGUUAAUCGUAUUCUGGGCCGGAGCA	-74.99	1600	1814	107	94	76	29	13	2	53	80	78	107	94	76	29	12	2	53	80	78
Sap-nmiR8	isoform_196896	+	UUGGCACGGCUCAAUCAGAUC	21	UUGAUUGAGCCGGUCCAACA	AGAGAAGAUAUUGGCACGGCUCAAUCAGAUCAGACGGCGCAAAGAACUUCACCUUCGGGCAAUCUGAUUUGAUUGAGCCGGUCCAACAUCUCUCC	-49.12	1853	1947	121	131	115	160	107	78	296	222	253	120	130	115	158	107	78	295	222	253
Sap-nmiR9	isoform_200093	+	GCACGUGGCUACGAACCAC	19	GGGCGGGGCCUGUAGCUCAGAGGAU	UCCCCCUUCACACCUCGGAACGCACCCUUAUUAUAGAGAAAAAGGCGCUUUCACAUCUUCUUAGCCCGAAAUGGCUGGGGAGGGGAAAGGUUCCUUUUUUUUUAGGGUACUCCCGGGAACAGACAGAUCCAGUGGAGACGGGGCGGGGCCUGUAGCUCAGAGGAUUAGAGCACGUGGCUACGAACCACGGUGUCGGGGGU	-79.95	113	312	140	152	148	0	0	0	0	0	0	136	152	148	0.001	0.001	0.001	0.001	0.001	0.001
Sap-nmiR10	isoform_213986	+	AAGCGCGAUGACCAAAUGUGC	21	CGGUAGCUUCGCGCCACUGGCU	UCUGCGUUGAUACCACUGCUUACUAGUAAGCAGUGGUAUCAACGCAGAGACGGGAAUCGGGCGACGGGUGCAUGUGUCGGUACUAGCCCGGAUUCUGACUUAGAGGCGUUCAGUCAUAAUCCAGCGCACGGUAGCUUCGCGCCACUGGCUUUUCAACCAAGCGCGAUGACCAAAUGUGCGAAUCAACGGUUCCUCUCGUACUCUGCGUUGAUACCACUGCUUACUAGUAAGCAGUGGUAUCAACGCAGAG	-151.28	0	249	1280	1314	1182	1229	1250	1118	350.5	426	442.5	1259	1297	1169	1214	1236	1106	338.5	420	438
Sap-nmiR11	isoform_214964	+	UGCCAGCACGUAGCUGUGCUGUC	23	GGAGCCGAGUGACGUGCCAGCGCUA	UGUUGCUGAGACAUGCGCCUAAGGAGAAAGGUCUUGCAACCGAAGUGAGCCGAGGAGCCGAGUGACGUGCCAGCGCUACUAAUUGAGUGCCAGCACGUAGCUGUGCUGUCAGUAAGAAGGGAGCGGUGCCUUUCGAAGCGAGACAACUCUUGCAGGUGAUGACGGCGUCGAGUUGGCGGCGGA	-67.07	1020	1202	2	0	13	15	13	1	0	0	0	2	0.001	13	15	13	1	0.001	0.001	0.001
Sap-nmiR12	isoform_234077	-	ACUGGAGGUCCAUCGGUCACU	21	GUGGCCGGUGGACUUUCGGUG	CAUGGGUGAGGGAAAGCAAUCAGGGCUUCCAACAUUCCCCUCCCUCUCUGACAAGGCUGCCAGUGGCCGGUGGACUUUCGGUGACCUGCCGGAUCAUCGACUAAUUGGGAGAGGGCUGGUGGAGAGCCAUCAAUCAUCGACUAAUUGGGAGCCCAAUUGGUCCUCUCCCAUUCCAGCUGGGUCACUGGAGGUCCAUCGGUCACUAAUAGCCUCAUCGGAGAGGGAGGGGACUGUUGGGAGCCCGGUUGGGUUUCCUCAUCCAU	-180.32	1	263	80	81	67	10	0	6	0	0	0	79	79	66	10	0.001	6	0.001	0.001	0.001
Sap-nmiR13	isoform_234933	+	AAGGAUGACUUGCCGGCCACG	21	CCCGGCAGGUUGUUCUUGGCU	AGGGGUCUUGCGUGAAGAGGAUGAGAGAGUCGAAUGCAGCCAAGGAUGACUUGCCGGCCACGCACUGGUAAGGGGGCCCAUGGCUGGGCUAUAAGUCCCCGAGCUACAGAGAUGGCUCCUUCGGUCCGGCGGCCCGGCAGGUUGUUCUUGGCUACACUCGGUUCUCUCCCUCUCCUGUGAGACCUUC	-105.29	127	313	7	10	0	0	0	0	0	0	0	7	10	0.001	0.001	0.001	0.001	0.001	0.001	0.001
Sap-nmiR14	isoform_274576	+	GCUAGUAUGGUAGAAAGAUUCAU	23	UAUAUUUCUUUCUACCAUACUAGCUAUC	AAUCCUGUAUUUGUAUACAGUAUAUAUAGUACAACUUGUUACAUUACAAUAAUAGCUAGUAUGGUAGAAAGAUUCAUAUAUUUCUUUCUACCAUACUAGCUAUCGGAUC	-43.12	514	622	66	45	66	7	11	0	0	0	0	65	44	66	7	11	0.001	0.001	0.001	0.001
Sap-nmiR15	isoform_101336	+	GAGUGGAUGAGCAGAUUUCUUG	22	UGGCGAACUCUGGCAUCACUCCGGA	GUUGCAACAGGGCUGCUCUCGGUGCACAGCUGAUGUGACAAUGGGAACAGGCUCUGUUGCAAGAAGCGAAACAAAUGGAAUGGCGAACUCUGGCAUCACUCCGGAAGACGGGAUCUUCAAUUUCUCCAGUGAGGACCCAAUGAAUUUAGAGUGGAUGAGCAGAUUUCUUGAAAUGGAUGAGAGUUGGUUCG	-62.3	443	633	15	0	12	0	0	0	0	0	0	15	0.001	11	0.001	0.001	0.001	0.001	0.001	0.001
Sap-nmiR16	isoform_279732	-	CCUGAGAUGACCUUCCGUAGAGGU	24	UCUUGAAGAGCAUACCAGGUAA	CUCCUCUUCCGACCCUGCAGCGAGACCGACUCUUCAGUUCCGAGCUUCUUGAAGAGCAUACCAGGUAAUCGCACCCCAUGUUGGAGGUGCCCUUGGACUUGCAAGGUCAAGAAAACCUGAGAUGACCUUCCGUAGAGGUUCGAAGAAGGGCGGACCGGGCCCGGAGAGGAA	-71.52	271	441	10743	10083	12908	571	534	379	2008	2513	3057	9936	9627	12333	568	519	370	1940	2466	2963
Sap-nmiR17	isoform_282006	+	AUUGUCAGGUGGGGAGUUUGGCU	23	CGCCUCUAGCCUUGCGACGCCG	UGAAUCGGAGGCGGGGCAACGCCCCUUCUUUUGGACCUAAGGUCCGCCUCGGCGGGCCGAUCCGGGCGGAAGACAUUGUCAGGUGGGGAGUUUGGCUGGGGCGGCACAUCUGUUAAAAGAUAACGCAGGUGUCCUAAGAUGAGCUCAACGAGAACAGAAAUCUCGUGUGGAACAAAAGGGUAAAAGCUCGUUGAUUCUGAUUUCCGCCGUCUCGGUCGCCUCUAGCCUUGCGACGCCGGUCCCCCUCCCGCCUCGGAUUCU	-111.44	1031	1291	4209	3519	3497	2050	2095	1597	2509	2316	2503	4113	3342	3442	1999	2071	1581	2402	2291	2434
Sap-nmiR18	isoform_282320	+	UCUGCCCUAUCAACUUUCGA	20	GGUGACGGGUGACGGAGAA	CGACGCAUCAUUCAAAUUUCUGCCCUAUCAACUUUCGAUGGUAGGAUAGGGGCCUACCAUGGUGGUGACGGGUGACGGAGAAUUAGGGUUCGAUUCCGGAGAGGGAGCCUGAGAAACGGCUACCACAUCCAAGGAAGGCAGCAGGCGCGCA	-47.05	74	224	140	92	82	300	281	267	1307	1294	1210	134	89	81	295	274	264	1284	1276	1182
Sap-nmiR19	isoform_288319	-	AUCUGUAACUCAUUCUCAU	19	UUAAAGACUUGAGUUGGAGCA	CUCUGGUUCUUUGCUGCUUUCUUGCUCCACAAUAUACCUCCCUAGGUCUCUAAGUUGAUCGUGCAUCUGUAACUCAUUCUCAUCAUCAAUUUUUAUUAAAGACUUGAGUUGGAGCACUUCAAUUCCAAGCCUCGGAGAAAACUUGCAAUCAUCCCACACGGGAAUUAACUUUCUGUAAUCCCAGCCGAUAAAAAAGCAUGCAAUGUCCAGAA	-52.71	1684	1895	70	84	80	88	91	68	21	50	23	69	81	80	88	91	68	20	49	23
Sap-nmiR20	isoform_294714	+	CUCCGAAGUUAAGCGUGCUUGGG	23	AGCACUAAUGCACCGGAUCC	CCCCCCGUACUCUGCGUUGAUACCACUGCUUACUAGUAAGCAGUGGUAUCAACGCAGAGUACGGGGGUGCGAUCAUACCAGCACUAAUGCACCGGAUCCCAUCAGAACUCCGAAGUUAAGCGUGCUUGGGCGAGAGUAGUACUAGGAUGGGUGACCUCCUGGGAAGUCCUCGUGUUGCACCCCGAAAAAAAAAAAAAAAAAAAAAAAAAAAAAAGACUACAUGUACUCUGCGUUGAUACCACUGCUUACUAGUAAGCAGUGGUAUCAACGCAGAGUACGGGGGC	-168.23	448	731	431	463	508	475	418	409	528	448	444	407	450	504	465	409	402	572	480	404
Sap-nmiR21	isoform_119704	+	AAAUCCGUCGACUUUAGAAAUCGU	24	AAAAUUCUAGUAAGAGGAAAA	AGAACUGAUUAAUCGGACGAGAAUAAAGAUAGAGUCCCAUUCUACAUGUCACUACCGACAACAACGAAAAUUCUAGUAAGAGGAAAAUCCGUCGACUUUAGAAAUCGUGAGGGUUCAAGUCCCUCUAUCCCCAGGACCCUUUGAUUCCUUAACUAUUUAUCUUAUUCUUUUAUCUUAUUCUUUUUGUUUUGUUAUCGGUUCA	-50.58	476	677	0	11	8	12	11	0	16	11	0	0.001	11	8	12	11	0.001	16	11	0.001
Sap-nmiR22	isoform_50525	+	GUGGGUGGCACUCGGUCCU	19	CGCACCGGACACCACGCGACGUG	GCUGUUCACCUUGGAGACCUGAUGCGGUUAUGAGUACGACCGGGCGUGGGUGGCACUCGGUCCUCCGGAUUUUCAAGGGCCGCCGGGGGCGCACCGGACACCACGCGACGUGCGGUGCUAUUCCAGCCGCUGGACCCUACCUCCGGCUGAGCCGUUUCCAGGGUGGGCAGG	-86.92	328	498	3154	3427	3350	6497	7467	6123	4483	7688	7348	3119	3406	3325	6435	7300	6062	4429	7597	7252
Sap-nmiR23	isoform_749	+	GACACAGGUGGUGCAUGGCUGUC	23	GCUCGUGCCGUAAGGUGUUGGG	AGAGAGGUGUGCCUUCGGGAACGCGGACACAGGUGGUGCAUGGCUGUCGUCAGCUCGUGCCGUAAGGUGUUGGGUUAAGUCCCGCAACGAGCGCAACCCUCG	-41.39	1075	1176	2689	2402	2618	871.5	942	865.5	321.5	376	400.75	2631	2369	2602	865	926	860.5	315.75	372	395.75
Sap-nmiR24	isoform_81380	+	GGAGCUCUCUGAAGUCCAAUAG	22	UUUGGAUUGAAGGGAGCUCUACA	GUUAGGGUUAGGGUUUUGGAGUGGAGCUCUCUGAAGUCCAAUAGAGGGCAUGGUUGAGUGGAUUGAGCUGCUGAUCUAUGGAUCCCACAGUACUAUCCCGUCAAAGGUGGAAGUGCAAAGGGGAUAGGGUUGUGGCUUGCAUAUAUCAGGAGCUUCAUUUGCUCAACUUAUCAGAUCUCUUGUUUGGAUUGAAGGGAGCUCUACACUUUGCUCUCCCCCUACCCCUAGU	-106.63	127	355	507	453	523	565	517	484	416	405	588	501	446	516	563	507	479	407	402	582
Sap-nmiR25	isoform_94737	-	GGCCUUCGCCAGGACAACACAGC	23	GGUUGUCGCUGCUCUGUGAAGCCAGCCUC	ACCGACUCGUUAUCCUUCCACUGCCGGGAGAGGGAGGUUGUCGCUGCUCUGUGAAGCCAGCCUCACGCUGUGCCCUCCGCUUUAGUGGCUGCGUCACCCCGGGCCUUCGCCAGGACAACACAGCCCGUCUCUCGGCUUGGAAUGGGCAAGCCAGUGUGAAUCCCACUCUGGGCUCGGCCCAAAGGCGUCGAACCCAUGUUCCAUCUCUCGAAAGCCCCCACUUGGGUUACAAGCCCUCGCAACUGAGCUCGG	-101.61	1	252	46	41	29	170	175	168	85	66	90	46	41	29	170	173	167	84	66	89
Sap-nmiR26	isoform_97859	+	UCGGCUCACAUGAUAUUAAAUU	22	UUAAUAUCUGAUACGUGGGUCAUC	UAUCUGUUCUUAUCAGUUUAAUAUCUGAUACGUGGGUCAUCGGCUCACAUGAUAUUAAAUUAGUUUUUCUAUGGGGAGGGCCCUUUACAGUAGCUUGCUGCUGGGGCUCUCGAGCGUCGCCCAGGAGUUG	-42.39	37	166	0	13	11	31	25	2	6	0	11	0.001	13	11	31	25	2	6	0.001	11
Sap-nmiR27	isoform_127280	+	CACUCGUCAAUCUCACCUGUAGUU	24	CCAAGUGAUGAUUGGCGAGUUC	UACCGACGAAGCACUCGUCAAUCUCACCUGUAGUUCACAUGGAGGCAUGCUUGUCUGUGGCGGCUGGCUGAUUGAUUCCCUCGGAUCCCGAUCCUGUUCACCUCUAUGUUUCGGACUCCAAGUGAUGAUUGGCGAGUUCUUCUUCGGUU	-63.42	125	273	2267	2218	1999	1599	1533	1679	372	423	463	2196	2179	1977	1572	1502	1652	366	419	456
Sap-nmiR28	isoform_145323	+	UGAAGCUGCCAGCUUGAUCUUCA	23	AUCAUGUGGUAGCUUCAC	UUGAAGCUGCCAGCUUGAUCUUCACUUCCCUCUCCCGCAAGCUUUUGGCUUCUCGAGGGGAAGACCAGAUCAUGUGGUAGCUUCAC	-43.2	82	167	15947	15047	15894	6163	6198	5867	4898	6463	5515	14106	13332	13950	5849	5879	5556	4667	6128	5235
Sap-nmiR29	isoform_147550	+	UUGGGCGGCGACCCAAGCCCAAGC	24	UGCGGAAACGUCGUGGCCUCGAUCGUGG	AGGGAAGCGGAUGGGGGCCGGCGAUGCGCCCGGCUCGGAUGUGGAACGGCGACGAGCCGUCCGCCGAUCGUCUCGGGCGUGGACCGAUGCGGAUUGGGCGGCGACCCAAGCCCAAGCCUUUGAAACGCUUGCGGAAACGUCGUGGCCUCGAUCGUGGUAGGCAGCGUGCGCCUCUUGGCGUGCCUCGGCACCUGCACGCUCGGGCAUCGCCGUGUGGCUCCCCAUUCGGCCCG	-125.91	407	639	535	407	509	1224	1430	1132	950	859	794	533	405	507	1218	1420	1132	945	853	783

## Sheet: Data S3
miRNA ID	LT1 vs LCK						LT2 vs LCK
	Expression (TPM, LCK)	Expression (TPM, LT1)	log2FoldChange(LT1/LCK)	P-value	Padj	Up/Down-Regulation	Expression (TPM, LCK)	Expression (TPM, LT2)	log2FoldChange(LT2/LCK)	P-value	Padj	Up/Down-Regulation
Sap-miR156a	/	/	/	/	/	/	135.594	317.735	1.22853	0.00211869	0.00547938	Up
Sap-miR160a-5p	33.7243	13.0473	-1.37004	0.00425812	0.0186606	Down	31.9924	8.49983	-1.91222	0.000318489	0.000955466	Down
Sap-miR160b	9250.67	724.215	-3.67507	8.51741e-05	0.000465831	Down	/	/	/	/	/	/
Sap-miR160h_1	/	/	/	/	/	/	62.4304	20.591	-1.60023	0.000140091	0.000428851	Down
Sap-miR164a	1592.95	4447.48	1.48129	0.0027774	0.0125404	Up	1512.94	7221.3	2.2549	0.0133701	0.0286503	Up
Sap-miR164b	/	/	/	/	/	/	252.629	515.574	1.02916	0.000992015	0.0027556	Up
Sap-miR164e	/	/	/	/	/	/	7.50502	46.343	2.62642	5.31644e-07	2.20619e-06	Up
Sap-miR166	/	/	/	/	/	/	45.4774	149.417	1.71612	2.19676e-08	1.02973e-07	Up
Sap-miR166-3p	/	/	/	/	/	/	222.093	891.975	2.00584	1.04568e-16	1.12037e-15	Up
Sap-miR166a	864.715	1919.6	1.15051	6.84835e-07	4.43654e-06	Up	821.251	2146.83	1.38631	2.02413e-05	7.22904e-05	Up
Sap-miR166a-3p	79012	218092	1.4648	8.75388e-05	0.000465831	Up	74562	158418	1.08722	1.47951e-24	2.46586e-23	Up
Sap-miR166c	777.619	3079.17	1.98541	1.14762e-08	9.49974e-08	Up	734.902	1707.79	1.21651	7.76054e-16	7.27551e-15	Up
Sap-miR166d-5p	19242.7	78225.3	2.02333	5.11934e-13	5.86755e-12	Up	18218.9	43626.3	1.25976	2.71661e-10	1.45533e-09	Up
Sap-miR166e	/	/	/	/	/	/	257.114	1275.73	2.31084	0.0220906	0.0453916	Up
Sap-miR166h-3p	3935.77	9256.41	1.23381	4.37291e-19	1.08594e-17	Up	3711.46	10352.4	1.47991	1.17241e-38	2.93103e-37	Up
Sap-miR166m	/	/	/	/	/	/	9251.83	23691.3	1.35655	2.81519e-06	1.08277e-05	Up
Sap-miR168a-3p	39122.5	147696	1.91656	8.22504e-12	8.17021e-11	Up	36867.9	96383.2	1.38642	2.00055e-05	7.22904e-05	Up
Sap-miR168a-5p	/	/	/	/	/	/	9512.75	2048.7	-2.21515	1.56718e-44	4.70154e-43	Down
Sap-miR169a-3p	211.223	50.0153	-2.07833	8.64217e-16	1.43076e-14	Down	200.171	51.2392	-1.96592	1.2335e-09	6.16748e-09	Down
Sap-miR169a-5p	290.737	100.033	-1.53924	5.35671e-08	4.20079e-07	Down	/	/	/	/	/	/
Sap-miR169b-5p	367.478	87.8869	-2.06394	0.000118671	0.000589397	Down	/	/	/	/	/	/
Sap-miR169d-5p	47.4166	171.547	1.85514	1.27143e-13	1.57869e-12	Up	44.2921	103.978	1.23116	5.44193e-07	2.20619e-06	Up
Sap-miR169e	3369.92	490.504	-2.78038	1.14416e-06	7.10332e-06	Down	3181.95	1264.16	-1.33173	0.0196354	0.0409072	Down
Sap-miR169h	1938.63	719.915	-1.42914	6.42367e-12	6.83662e-11	Down	1837.37	714.642	-1.36235	2.37068e-11	1.42241e-10	Down
Sap-miR169r-3p	158.083	68.3904	-1.20882	0.00267798	0.0124693	Down	151.147	14.7286	-3.35926	6.43897e-13	4.59926e-12	Down
Sap-miR169v	122.095	1006.89	3.04383	0.00592259	0.0220616	Up	114.852	242.65	1.0791	9.73845e-14	8.11538e-13	Up
Sap-miR171	11420.6	37997.7	1.73427	5.18501e-05	0.000297141	Up	10749	24184.7	1.16989	2.83913e-28	5.32336e-27	Up
Sap-miR171a-3p	/	/	/	/	/	/	42.9035	17.2346	-1.31579	0.00457138	0.0112411	Down
Sap-miR171b	13.9917	70.3066	2.32909	6.49608e-08	4.83958e-07	Up	13.3057	149.208	3.48721	2.76909e-13	2.07682e-12	Up
Sap-miR172a_2	271.175	603.485	1.15409	1.97999e-16	3.68773e-15	Up	255.612	53.6635	-2.25194	2.47106e-05	8.61996e-05	Down
Sap-miR172a_3	12781.9	6039.72	-1.08154	6.81686e-24	3.38571e-22	Down	12076.3	5653.14	-1.09506	1.08418e-30	2.32323e-29	Down
Sap-miR172b_1	/	/	/	/	/	/	740.635	287.54	-1.365	0.000592345	0.00170869	Down
Sap-miR172b_2	/	/	/	/	/	/	418.555	2268.36	2.43816	0.0112914	0.025027	Up
Sap-miR172c-3p	/	/	/	/	/	/	18.7746	48.1605	1.35907	0.001998	0.00525788	Up
Sap-miR172d	/	/	/	/	/	/	666.956	3124.61	2.22801	0.00742774	0.0174088	Up
Sap-miR172g-3p	/	/	/	/	/	/	913.418	6483.11	2.82734	2.30035e-12	1.5646e-11	Up
Sap-miR319a_1	395.043	125.083	-1.65912	3.21886e-15	4.36009e-14	Down	374.562	111.954	-1.7423	4.06865e-18	5.54816e-17	Down
Sap-miR393-5p	/	/	/	/	/	/	23.1321	5.08753	-2.18486	0.00967494	0.0219885	Down
Sap-miR393a	6304.98	2943.35	-1.09903	1.71697e-17	3.65469e-16	Down	5961.29	723.046	-3.04347	2.6502e-21	3.9753e-20	Down
Sap-miR393h	/	/	/	/	/	/	227.366	952.812	2.06717	1.28454e-13	1.01411e-12	Up
Sap-miR394a_1	/	/	/	/	/	/	8509.73	3847.47	-1.1452	9.64859e-18	1.20607e-16	Down
Sap-miR394a_2	/	/	/	/	/	/	13200.5	40545.5	1.61895	5.43357e-15	4.79433e-14	Up
Sap-miR396-3p	/	/	/	/	/	/	76206.2	197964	1.37726	2.79446e-05	9.52658e-05	Up
Sap-miR396a-3p_2	69.5271	594.841	3.09686	0.00507792	0.0199108	Up	65.481	309.267	2.23971	0.0043906	0.0109765	Up
Sap-miR396a-3p_4	627.061	181.278	-1.7904	0.000101576	0.000521891	Down	592.902	212.228	-1.48218	7.64164e-06	2.86561e-05	Down
Sap-miR396a-5p	67.2297	27.8759	-1.27008	0.00469247	0.0195245	Down	64.3005	13.9705	-2.20244	1.60048e-07	7.06095e-07	Down
Sap-miR396b	/	/	/	/	/	/	1681.11	446.549	-1.91252	8.64528e-07	3.41261e-06	Down
Sap-miR396b-3p	69231.9	178149	1.36358	0.00575573	0.0219899	Up	65342.3	288189	2.14093	2.39906e-12	1.5646e-11	Up
Sap-miR396h	/	/	/	/	/	/	186.339	1503.43	3.01226	0.00476673	0.0115324	Up
Sap-miR398b	64494.9	27687.3	-1.21996	1.31094e-19	3.90659e-18	Down	60940.7	21329.3	-1.51457	1.35715e-47	6.78574e-46	Down
Sap-miR4995	36.5804	11.2809	-1.69718	0.00254138	0.012215	Down	34.9589	2.93678	-3.57335	2.10431e-08	1.01821e-07	Down
Sap-miR530a	/	/	/	/	/	/	1.93465	13.8598	2.84077	0.0013014	0.0034859	Up
Sap-miR535a	/	/	/	/	/	/	8014.39	16419.1	1.03471	0.0029057	0.00738736	Up
Sap-miR5368	81.3239	26.3766	-1.62442	1.05206e-05	6.2703e-05	Down	77.2707	22.6005	-1.77357	0.00583906	0.0139025	Down
Sap-miR8051-5p	/	/	/	/	/	/	28.4523	4.46954	-2.67034	6.58337e-05	0.000214675	Down
Sap-miR8620	457.502	214.888	-1.09019	5.67296e-10	4.97219e-09	Down	432.726	139.945	-1.62859	7.35405e-46	2.75777e-44	Down
Sap-nmiR1	692.302	263.236	-1.39505	1.095e-07	7.76931e-07	Down	653.791	31.6093	-4.37041	7.77438e-53	5.83079e-51	Down
Sap-nmiR10	/	/	/	/	/	/	1086.93	423.548	-1.35967	0.0123396	0.0268251	Down
Sap-nmiR12	62.6861	9.95439	-2.65474	0.00471733	0.0195245	Down	64.8449	0.551616	-6.87718	6.36757e-12	3.97973e-11	Down
Sap-nmiR14	48.2282	8.78955	-2.45602	0.00944187	0.0343132	Down	50.5555	0.551586	-6.51814	2.16998e-10	1.20555e-09	Down
Sap-nmiR16	9814.3	512.339	-4.25971	1.38204e-152	2.05925e-150	Down	9286.66	2632.63	-1.81865	6.9775e-17	8.05097e-16	Down
Sap-nmiR18	96.6212	288.235	1.57683	4.53842e-07	3.07375e-06	Up	90.5818	1321.89	3.86724	1.7969e-65	2.69535e-63	Up
Sap-nmiR19	/	/	/	/	/	/	66.5996	32.3602	-1.04129	0.00893261	0.0206137	Down
Sap-nmiR20	/	/	/	/	/	/	368.147	1823.94	2.30871	0.0113456	0.025027	Up
Sap-nmiR22	3047.85	6886.57	1.17599	1.27396e-25	9.49102e-24	Up	2886.66	6782.65	1.23245	3.57897e-08	1.6268e-07	Up
Sap-nmiR23	2348.17	926.386	-1.34185	0.0100828	0.0357699	Down	2218.33	383.89	-2.53071	8.40851e-05	0.000268357	Down
Sap-nmiR25	37.4477	176.765	2.23888	9.43542e-12	8.78673e-11	Up	34.2987	84.7979	1.30588	9.91233e-05	0.00030976	Up
Sap-nmiR27	/	/	/	/	/	/	1853.63	440.045	-2.07463	0.000367193	0.00107998	Down
Sap-nmiR29	447.631	1309.24	1.54835	0.0048695	0.0196096	Up	422.952	912.555	1.10942	6.98507e-11	4.02985e-10	Up
Sap-nmiR3	/	/	/	/	/	/	39.8362	6.02296	-2.72554	0.0158441	0.0334734	Down
Sap-nmiR6	5772.31	2746.03	-1.0718	2.42974e-15	3.62031e-14	Down	5463.37	1196.26	-2.19126	0.000795605	0.00225171	Down
Sap-nmiR8	/	/	/	/	/	/	107.074	273.283	1.35178	3.10641e-10	1.60676e-09	Up
Sap-nmiR9	133.517	1.10431	-6.91774	9.20936e-20	3.43049e-18	Down	126.595	0.599361	-7.72257	7.14995e-16	7.14995e-15	Down

## Sheet: Data S4
miRNA ID	Target ID	TargetFinder score	TargetFinder aligned_fragment	psRobot score	psRobot aligned_fragment
Sap-miR156a	isoform_103749	1	target 5' UGUGCUCUCUCUCUUCUGUCA 3' ::::::: ::::::::::::: query 3' ACACGAGUGAGAGAAGACAGU 5'	1	Query: 1 TGACAGAAGAGAGTGAGCACA 21 |||||||||||||*||||||| Sbjct: 2150 ACTGTCTTCTCTCTCTCGTGT 2130
Sap-miR156a	isoform_104696	1	target 5' UGUGCUCUCUCUCUUCUGUCA 3' ::::::: ::::::::::::: query 3' ACACGAGUGAGAGAAGACAGU 5'	1	Query: 1 TGACAGAAGAGAGTGAGCACA 21 |||||||||||||*||||||| Sbjct: 1100 ACTGTCTTCTCTCTCTCGTGT 1080
Sap-miR156a	isoform_116599	1	target 5' UGUGCUCUCUCUCUUCUGUCA 3' ::::::: ::::::::::::: query 3' ACACGAGUGAGAGAAGACAGU 5'	1	Query: 1 TGACAGAAGAGAGTGAGCACA 21 |||||||||||||*||||||| Sbjct: 218 ACTGTCTTCTCTCTCTCGTGT 198
Sap-miR156a	isoform_12132	1	target 5' UGUGCUCUCUCUCUUCUGUCA 3' ::::::: ::::::::::::: query 3' ACACGAGUGAGAGAAGACAGU 5'	1	Query: 1 TGACAGAAGAGAGTGAGCACA 21 |||||||||||||*||||||| Sbjct: 1573 ACTGTCTTCTCTCTCTCGTGT 1553
Sap-miR156a	isoform_123539	2	target 5' AGUGCUCUCUCUCUUCUGUCA 3' :::::: ::::::::::::: query 3' ACACGAGUGAGAGAAGACAGU 5'	1.5	Query: 1 TGACAGAAGAGAGTGAGCACA 21 |||||||||||||*||||||* Sbjct: 882 ACTGTCTTCTCTCTCTCGTGA 862
Sap-miR156a	isoform_126103	0.5	target 5' UGUGCUCGCUCUCUUCUGUCA 3' :::::::.::::::::::::: query 3' ACACGAGUGAGAGAAGACAGU 5'	0.5	Query: 1 TGACAGAAGAGAGTGAGCACA 21 |||||||||||||:||||||| Sbjct: 384 ACTGTCTTCTCTCGCTCGTGT 364
Sap-miR156a	isoform_126933	1	target 5' UGUGCUCUCUCUCUUCUGUCA 3' ::::::: ::::::::::::: query 3' ACACGAGUGAGAGAAGACAGU 5'	1	Query: 1 TGACAGAAGAGAGTGAGCACA 21 |||||||||||||*||||||| Sbjct: 1190 ACTGTCTTCTCTCTCTCGTGT 1170
Sap-miR156a	isoform_137211	1	target 5' UGUGCUCUCUCUCUUCUGUCA 3' ::::::: ::::::::::::: query 3' ACACGAGUGAGAGAAGACAGU 5'	1	Query: 1 TGACAGAAGAGAGTGAGCACA 21 |||||||||||||*||||||| Sbjct: 1319 ACTGTCTTCTCTCTCTCGTGT 1299
Sap-miR156a	isoform_140631	2	target 5' GGUGCUCUCUCUCUUCUGUCA 3' :::::: ::::::::::::: query 3' ACACGAGUGAGAGAAGACAGU 5'	1.5	Query: 1 TGACAGAAGAGAGTGAGCACA 21 |||||||||||||*||||||* Sbjct: 588 ACTGTCTTCTCTCTCTCGTGG 568
Sap-miR156a	isoform_141673	1	target 5' UGUGCUCUCUCUCUUCUGUCA 3' ::::::: ::::::::::::: query 3' ACACGAGUGAGAGAAGACAGU 5'	1	Query: 1 TGACAGAAGAGAGTGAGCACA 21 |||||||||||||*||||||| Sbjct: 1413 ACTGTCTTCTCTCTCTCGTGT 1393
Sap-miR160a-5p	isoform_167840	2.5	target 5' AAGUAUACAGGGAGCCAGGCA 3' :.::::::::::::::::: query 3' ACCGUAUGUCCCUCGGUCCGU 5'	1.2	Query: 1 TGCCTGGCTCCCTGTATGCCA 21 |||||||||||||||||:|** Sbjct: 1787 ACGGACCGAGGGACATATGAA 1767
Sap-miR160a-5p	isoform_178997	2.5	target 5' AAGUAUACAGGGAGCCAGGCA 3' :.::::::::::::::::: query 3' ACCGUAUGUCCCUCGGUCCGU 5'	1.2	Query: 1 TGCCTGGCTCCCTGTATGCCA 21 |||||||||||||||||:|** Sbjct: 479 ACGGACCGAGGGACATATGAA 459
Sap-miR160a-5p	isoform_186025	0.5	target 5' UGGCAUGCAGGGAGCCAGGCA 3' ::::::.:::::::::::::: query 3' ACCGUAUGUCCCUCGGUCCGU 5'	0.5	Query: 1 TGCCTGGCTCCCTGTATGCCA 21 ||||||||||||||:|||||| Sbjct: 2338 ACGGACCGAGGGACGTACGGT 2318
Sap-miR160a-5p	isoform_192238	2.5	target 5' AAGUAUACAGGGAGCCAGGCA 3' :.::::::::::::::::: query 3' ACCGUAUGUCCCUCGGUCCGU 5'	1.2	Query: 1 TGCCTGGCTCCCTGTATGCCA 21 |||||||||||||||||:|** Sbjct: 1652 ACGGACCGAGGGACATATGAA 1632
Sap-miR160a-5p	isoform_283300	0.5	target 5' UGGCAUGCAGGGAGCCAGGCA 3' ::::::.:::::::::::::: query 3' ACCGUAUGUCCCUCGGUCCGU 5'	0.5	Query: 1 TGCCTGGCTCCCTGTATGCCA 21 ||||||||||||||:|||||| Sbjct: 1442 ACGGACCGAGGGACGTACGGT 1422
Sap-miR160a-5p	isoform_3681	2.5	target 5' AAGUAUACAGGGAGCCAGGCA 3' :.::::::::::::::::: query 3' ACCGUAUGUCCCUCGGUCCGU 5'	1.2	Query: 1 TGCCTGGCTCCCTGTATGCCA 21 |||||||||||||||||:|** Sbjct: 2032 ACGGACCGAGGGACATATGAA 2012
Sap-miR160a-5p	isoform_5467	2	target 5' AGGCAUUCAGGGAGCCAGGCA 3' ::::: :::::::::::::: query 3' ACCGUAUGUCCCUCGGUCCGU 5'	1.5	Query: 1 TGCCTGGCTCCCTGTATGCCA 21 ||||||||||||||*|||||* Sbjct: 1770 ACGGACCGAGGGACTTACGGA 1750
Sap-miR160a-5p	isoform_6454	2.5	target 5' AAGUAUACAGGGAGCCAGGCA 3' :.::::::::::::::::: query 3' ACCGUAUGUCCCUCGGUCCGU 5'	1.2	Query: 1 TGCCTGGCTCCCTGTATGCCA 21 |||||||||||||||||:|** Sbjct: 1829 ACGGACCGAGGGACATATGAA 1809
Sap-miR160b	isoform_102751	3	target 5' AGCAUACUGGGAGCCAGGCA 3' :::::: :::::::::::: query 3' CCGUAUGUCCCUCGGUCCGU 5'	1.5	Query: 1 TGCCTGGCTCCCTGTATGCC 20 ||||||||||||*||||||* Sbjct: 382 ACGGACCGAGGGTCATACGA 363
Sap-miR160b	isoform_105018	3	target 5' AGCAUACAGGGCGCCAGGCA 3' :::::::::: :::::::: query 3' CCGUAUGUCCCUCGGUCCGU 5'	1.5	Query: 1 TGCCTGGCTCCCTGTATGCC 20 ||||||||*||||||||||* Sbjct: 1332 ACGGACCGCGGGACATACGA 1313
Sap-miR160b	isoform_112879	3	target 5' AGCAUACAGGGCGCCAGGCA 3' :::::::::: :::::::: query 3' CCGUAUGUCCCUCGGUCCGU 5'	1.5	Query: 1 TGCCTGGCTCCCTGTATGCC 20 ||||||||*||||||||||* Sbjct: 1613 ACGGACCGCGGGACATACGA 1594
Sap-miR160b	isoform_245305	3	target 5' AGCAUACUGGGAGCCAGGCA 3' :::::: :::::::::::: query 3' CCGUAUGUCCCUCGGUCCGU 5'	1.5	Query: 1 TGCCTGGCTCCCTGTATGCC 20 ||||||||||||*||||||* Sbjct: 1453 ACGGACCGAGGGTCATACGA 1434
Sap-miR160b	isoform_6363	3	target 5' AGCAUACAGGGCGCCAGGCA 3' :::::::::: :::::::: query 3' CCGUAUGUCCCUCGGUCCGU 5'	1.5	Query: 1 TGCCTGGCTCCCTGTATGCC 20 ||||||||*||||||||||* Sbjct: 1714 ACGGACCGCGGGACATACGA 1695
Sap-miR160b	isoform_6400	3	target 5' AGCAUACAGGGCGCCAGGCA 3' :::::::::: :::::::: query 3' CCGUAUGUCCCUCGGUCCGU 5'	1.5	Query: 1 TGCCTGGCTCCCTGTATGCC 20 ||||||||*||||||||||* Sbjct: 1672 ACGGACCGCGGGACATACGA 1653
Sap-miR160b	isoform_6454	1.5	target 5' AGUAUACAGGGAGCCAGGCA 3' :.::::::::::::::::: query 3' CCGUAUGUCCCUCGGUCCGU 5'	0.8	Query: 1 TGCCTGGCTCCCTGTATGCC 20 |||||||||||||||||:|* Sbjct: 1829 ACGGACCGAGGGACATATGA 1810
Sap-miR160b	isoform_6749	3	target 5' AGCAUACAGGGCGCCAGGCA 3' :::::::::: :::::::: query 3' CCGUAUGUCCCUCGGUCCGU 5'	1.5	Query: 1 TGCCTGGCTCCCTGTATGCC 20 ||||||||*||||||||||* Sbjct: 1671 ACGGACCGCGGGACATACGA 1652
Sap-miR160b	isoform_6859	3	target 5' AGCAUACAGGGCGCCAGGCA 3' :::::::::: :::::::: query 3' CCGUAUGUCCCUCGGUCCGU 5'	1.5	Query: 1 TGCCTGGCTCCCTGTATGCC 20 ||||||||*||||||||||* Sbjct: 1670 ACGGACCGCGGGACATACGA 1651
Sap-miR160h_1	isoform_186025	2	target 5' GCUGGCAUGCAGGGAGCCAGGCA 3' . ::::::.:::::::::::::: query 3' UUACCGUAUGUCCCUCGGUCCGU 5'	1.2	Query: 1 TGCCTGGCTCCCTGTATGCCATT 23 ||||||||||||||:||||||*: Sbjct: 2338 ACGGACCGAGGGACGTACGGTCG 2316
Sap-miR160h_1	isoform_27202	2	target 5' GCUGGCAUGCAGGGAGCCAGGCA 3' . ::::::.:::::::::::::: query 3' UUACCGUAUGUCCCUCGGUCCGU 5'	1.2	Query: 1 TGCCTGGCTCCCTGTATGCCATT 23 ||||||||||||||:||||||*: Sbjct: 882 ACGGACCGAGGGACGTACGGTCG 860
Sap-miR160h_1	isoform_283300	2	target 5' GCUGGCAUGCAGGGAGCCAGGCA 3' . ::::::.:::::::::::::: query 3' UUACCGUAUGUCCCUCGGUCCGU 5'	1.2	Query: 1 TGCCTGGCTCCCTGTATGCCATT 23 ||||||||||||||:||||||*: Sbjct: 1442 ACGGACCGAGGGACGTACGGTCG 1420
Sap-miR160h_1	isoform_4530	2	target 5' GCUGGCAUGCAGGGAGCCAGGCA 3' . ::::::.:::::::::::::: query 3' UUACCGUAUGUCCCUCGGUCCGU 5'	1.2	Query: 1 TGCCTGGCTCCCTGTATGCCATT 23 ||||||||||||||:||||||*: Sbjct: 1987 ACGGACCGAGGGACGTACGGTCG 1965
Sap-miR160h_1	isoform_5467	3.5	target 5' GCAGGCAUUCAGGGAGCCAGGCA 3' . ::::: :::::::::::::: query 3' UUACCGUAUGUCCCUCGGUCCGU 5'	2	Query: 1 TGCCTGGCTCCCTGTATGCCATT 23 ||||||||||||||*|||||*|* Sbjct: 1770 ACGGACCGAGGGACTTACGG-AC 1749
Sap-miR164a	isoform_117484	0	target 5' AGCAAGUGCCCUGCUUCUCCA 3' ::::::::::::::::::::: query 3' UCGUUCACGGGACGAAGAGGU 5'	0	Query: 1 TGGAGAAGCAGGGCACTTGCT 21 ||||||||||||||||||||| Sbjct: 603 ACCTCTTCGTCCCGTGAACGA 583
Sap-miR164a	isoform_164763	3	target 5' AGCAUGUGUCCUGUUUCUCCA 3' :::: :::.::::.::::::: query 3' UCGUUCACGGGACGAAGAGGU 5'	2	Query: 1 TGGAGAAGCAGGGCACTTGCT 21 |||||||:||||:|||*|||| Sbjct: 867 ACCTCTTTGTCCTGTGTACGA 847
Sap-miR164a	isoform_247705	3	target 5' CUCACGUGCCCUGCUUCUCCA 3' :: :::::::::::::::: query 3' UCGUUCACGGGACGAAGAGGU 5'	2	Query: 1 TGGAGAAGCAGGGCACTTGCT 21 ||||||||||||||||*||** Sbjct: 4155 ACCTCTTCGTCCCGTGCACTC 4135
Sap-miR164a	isoform_269129	3	target 5' AGCACAUGCUCUGCUUCUCCA 3' :::: :::.::::::::::: query 3' UCGUUCACGGGACGAAGAGGU 5'	2.5	Query: 1 TGGAGAAGCAGGGCACTTGCT 21 |||||||||||:|||**|||| Sbjct: 707 ACCTCTTCGTCTCGTACACGA 687
Sap-miR164a	isoform_68513	3	target 5' CUCACGUGCCCUGCUUCUCCA 3' :: :::::::::::::::: query 3' UCGUUCACGGGACGAAGAGGU 5'	2	Query: 1 TGGAGAAGCAGGGCACTTGCT 21 ||||||||||||||||*||** Sbjct: 256 ACCTCTTCGTCCCGTGCACTC 236
Sap-miR164b	isoform_105101	2	target 5' CUGCGUGCCCUGCUUCUCCA 3' ..::::::::::::::::: query 3' CGUGCACGGGACGAAGAGGU 5'	1	Query: 1 TGGAGAAGCAGGGCACGTGC 20 |||||||||||||||||::* Sbjct: 600 ACCTCTTCGTCCCGTGCGTC 581
Sap-miR164b	isoform_117484	1	target 5' GCAAGUGCCCUGCUUCUCCA 3' ::: :::::::::::::::: query 3' CGUGCACGGGACGAAGAGGU 5'	1	Query: 1 TGGAGAAGCAGGGCACGTGC 20 ||||||||||||||||*||| Sbjct: 603 ACCTCTTCGTCCCGTGAACG 584
Sap-miR164b	isoform_127146	3.5	target 5' GCAUGCGCCCUGCUUUUUCA 3' :::.: :::::::::.:.:: query 3' CGUGCACGGGACGAAGAGGU 5'	2.5	Query: 1 TGGAGAAGCAGGGCACGTGC 20 ||:|:|||||||||*|:||| Sbjct: 1100 ACTTTTTCGTCCCGCGTACG 1081
Sap-miR164b	isoform_207899	2	target 5' UCACGUGCCCUGCUUCUCCC 3' :::::::::::::::::: query 3' CGUGCACGGGACGAAGAGGU 5'	1	Query: 1 TGGAGAAGCAGGGCACGTGC 20 *||||||||||||||||||* Sbjct: 853 CCCTCTTCGTCCCGTGCACT 834
Sap-miR164b	isoform_247705	1	target 5' UCACGUGCCCUGCUUCUCCA 3' ::::::::::::::::::: query 3' CGUGCACGGGACGAAGAGGU 5'	0.5	Query: 1 TGGAGAAGCAGGGCACGTGC 20 |||||||||||||||||||* Sbjct: 4155 ACCTCTTCGTCCCGTGCACT 4136
Sap-miR164b	isoform_68513	1	target 5' UCACGUGCCCUGCUUCUCCA 3' ::::::::::::::::::: query 3' CGUGCACGGGACGAAGAGGU 5'	0.5	Query: 1 TGGAGAAGCAGGGCACGTGC 20 |||||||||||||||||||* Sbjct: 256 ACCTCTTCGTCCCGTGCACT 237
Sap-miR164b	isoform_70379	2	target 5' UGACGUGCCCUGCUUCUCCA 3' :::::::::::::::::: query 3' CGUGCACGGGACGAAGAGGU 5'	0.5	Query: 1 TGGAGAAGCAGGGCACGTGC 20 ||||||||||||||||||*| Sbjct: 265 ACCTCTTCGTCCCGTGCA-G 247
Sap-miR164e	isoform_247705	0	target 5' CUCACGUGCCCUGCUUCUCCA 3' ::::::::::::::::::::: query 3' GAGUGCACGGGACGAAGAGGU 5'	0	Query: 1 TGGAGAAGCAGGGCACGTGAG 21 ||||||||||||||||||||| Sbjct: 4155 ACCTCTTCGTCCCGTGCACTC 4135
Sap-miR164e	isoform_32927	3	target 5' CUCAAGUGCCCUGUUUCUUCA 3' :::: ::::::::.::::.:: query 3' GAGUGCACGGGACGAAGAGGU 5'	2	Query: 1 TGGAGAAGCAGGGCACGTGAG 21 ||:||||:||||||||*|||| Sbjct: 414 ACTTCTTTGTCCCGTGAACTC 394
Sap-miR164e	isoform_39543	2	target 5' CUUGCUUGCCCUGCUUCUCCA 3' ::..: ::::::::::::::: query 3' GAGUGCACGGGACGAAGAGGU 5'	1.5	Query: 1 TGGAGAAGCAGGGCACGTGAG 21 |||||||||||||||*|::|| Sbjct: 521 ACCTCTTCGTCCCGTTCGTTC 501
Sap-miR164e	isoform_40730	3	target 5' CUCAAGUGCCCUGUUUCUUCA 3' :::: ::::::::.::::.:: query 3' GAGUGCACGGGACGAAGAGGU 5'	2	Query: 1 TGGAGAAGCAGGGCACGTGAG 21 ||:||||:||||||||*|||| Sbjct: 164 ACTTCTTTGTCCCGTGAACTC 144
Sap-miR164e	isoform_43362	2	target 5' CUUGCUUGCCCUGCUUCUCCA 3' ::..: ::::::::::::::: query 3' GAGUGCACGGGACGAAGAGGU 5'	1.5	Query: 1 TGGAGAAGCAGGGCACGTGAG 21 |||||||||||||||*|::|| Sbjct: 441 ACCTCTTCGTCCCGTTCGTTC 421
Sap-miR164e	isoform_44057	3	target 5' CUCAAGUGCCCUGUUUCUUCA 3' :::: ::::::::.::::.:: query 3' GAGUGCACGGGACGAAGAGGU 5'	2	Query: 1 TGGAGAAGCAGGGCACGTGAG 21 ||:||||:||||||||*|||| Sbjct: 166 ACTTCTTTGTCCCGTGAACTC 146
Sap-miR164e	isoform_68513	0	target 5' CUCACGUGCCCUGCUUCUCCA 3' ::::::::::::::::::::: query 3' GAGUGCACGGGACGAAGAGGU 5'	0	Query: 1 TGGAGAAGCAGGGCACGTGAG 21 ||||||||||||||||||||| Sbjct: 256 ACCTCTTCGTCCCGTGCACTC 236
Sap-miR164e	isoform_70379	1	target 5' CUGACGUGCCCUGCUUCUCCA 3' :: :::::::::::::::::: query 3' GAGUGCACGGGACGAAGAGGU 5'	0.5	Query: 1 TGGAGAAGCAGGGCACGTGAG 21 ||||||||||||||||||*|| Sbjct: 265 ACCTCTTCGTCCCGTGCAGTC 245
Sap-miR166	isoform_109978	3.5	target 5' CCUGGAAUGAAGCCUGGUCCGG 3' ::::::::::::::::::. query 3' CCCCCUUACUUCGGACCAGGCU 5'	1.8	Query: 1 TCGGACCAGGCTTCATTCC-CCC 22 :||||||||||||||||||***| Sbjct: 1229 GGCCTGGTCCGAAGTAAGGTCCG 1207
Sap-miR166	isoform_139360	3.5	target 5' CCUGGAAUGAAGCCUGGUCCGG 3' ::::::::::::::::::. query 3' CCCCCUUACUUCGGACCAGGCU 5'	1.8	Query: 1 TCGGACCAGGCTTCATTCC-CCC 22 :||||||||||||||||||***| Sbjct: 1058 GGCCTGGTCCGAAGTAAGGTCCG 1036
Sap-miR166	isoform_1580	3.5	target 5' CCUGGAAUGAAGCCUGGUCCGG 3' ::::::::::::::::::. query 3' CCCCCUUACUUCGGACCAGGCU 5'	1.8	Query: 1 TCGGACCAGGCTTCATTCC-CCC 22 :||||||||||||||||||***| Sbjct: 1327 GGCCTGGTCCGAAGTAAGGTCCG 1305
Sap-miR166	isoform_1593	2.5	target 5' CUGGGAAUGAAGCCUGGUCCGG 3' :::::::::::::::::::. query 3' CCCCCUUACUUCGGACCAGGCU 5'	1.2	Query: 1 TCGGACCAGGCTTCATTCCCCC 22 :|||||||||||||||||||** Sbjct: 1282 GGCCTGGTCCGAAGTAAGGGTC 1261
Sap-miR166	isoform_1647	3.5	target 5' CCUGGAAUGAAGCCUGGUCCGG 3' ::::::::::::::::::. query 3' CCCCCUUACUUCGGACCAGGCU 5'	1.8	Query: 1 TCGGACCAGGCTTCATTCC-CCC 22 :||||||||||||||||||***| Sbjct: 1285 GGCCTGGTCCGAAGTAAGGTCCG 1263
Sap-miR166	isoform_1924	3.5	target 5' CCUGGAAUGAAGCCUGGUCCGG 3' ::::::::::::::::::. query 3' CCCCCUUACUUCGGACCAGGCU 5'	1.8	Query: 1 TCGGACCAGGCTTCATTCC-CCC 22 :||||||||||||||||||***| Sbjct: 1224 GGCCTGGTCCGAAGTAAGGTCCG 1202
Sap-miR166	isoform_290365	3.5	target 5' CCUGGAAUGAAGCCUGGUCCGG 3' ::::::::::::::::::. query 3' CCCCCUUACUUCGGACCAGGCU 5'	1.8	Query: 1 TCGGACCAGGCTTCATTCC-CCC 22 :||||||||||||||||||***| Sbjct: 380 GGCCTGGTCCGAAGTAAGGTCCG 358
Sap-miR166	isoform_98977	3.5	target 5' CCUGGAAUGAAGCCUGGUCCGG 3' ::::::::::::::::::. query 3' CCCCCUUACUUCGGACCAGGCU 5'	1.8	Query: 1 TCGGACCAGGCTTCATTCC-CCC 22 :||||||||||||||||||***| Sbjct: 1251 GGCCTGGTCCGAAGTAAGGTCCG 1229
Sap-miR166-3p	isoform_1593	3	target 5' UGGGAAUGAAGCCUGGUCCGGGAU 3' :::::::::::::::::::..:: query 3' CCCCUUACUUCGGACCAGGCUUUA 5'	1.5	Query: 1 ATTTCGGACCAGGCTTCATTCCCC 24 ||::|||||||||||||||||||* Sbjct: 1285 TAGGGCCTGGTCCGAAGTAAGGGT 1262
Sap-miR166a	isoform_109978	0.5	target 5' GGAAUGAAGCCUGGUCCGG 3' ::::::::::::::::::. query 3' CCUUACUUCGGACCAGGCU 5'	0.2	Query: 1 TCGGACCAGGCTTCATTCC 19 :|||||||||||||||||| Sbjct: 1229 GGCCTGGTCCGAAGTAAGG 1211
Sap-miR166a	isoform_129679	1	target 5' GGGAUGAAGCCUGGUCCGG 3' ::.:::::::::::::::. query 3' CCUUACUUCGGACCAGGCU 5'	0.8	Query: 1 TCGGACCAGGCTTCATTCC 19 :|||||||||||||||:|| Sbjct: 376 GGCCTGGTCCGAAGTAGGG 358
Sap-miR166a	isoform_1647	0.5	target 5' GGAAUGAAGCCUGGUCCGG 3' ::::::::::::::::::. query 3' CCUUACUUCGGACCAGGCU 5'	0.2	Query: 1 TCGGACCAGGCTTCATTCC 19 :|||||||||||||||||| Sbjct: 1285 GGCCTGGTCCGAAGTAAGG 1267
Sap-miR166a	isoform_172073	2.5	target 5' GGGAUGAAGCCUGGUCCAGA 3' ::.:::::::::::::: :: query 3' CCUUACUUCGGACCAGG-CU 5'	1.8	Query: 1 TCGGACCAGGCTTCATTCC 19 :*||||||||||||||:|| Sbjct: 911 GACCTGGTCCGAAGTAGGG 893
Sap-miR166a	isoform_1924	0.5	target 5' GGAAUGAAGCCUGGUCCGG 3' ::::::::::::::::::. query 3' CCUUACUUCGGACCAGGCU 5'	0.2	Query: 1 TCGGACCAGGCTTCATTCC 19 :|||||||||||||||||| Sbjct: 1224 GGCCTGGTCCGAAGTAAGG 1206
Sap-miR166a	isoform_2849	1	target 5' GGGAUGAAGCCUGGUCCGG 3' ::.:::::::::::::::. query 3' CCUUACUUCGGACCAGGCU 5'	0.8	Query: 1 TCGGACCAGGCTTCATTCC 19 :|||||||||||||||:|| Sbjct: 994 GGCCTGGTCCGAAGTAGGG 976
Sap-miR166a	isoform_2854	1	target 5' GGGAUGAAGCCUGGUCCGG 3' ::.:::::::::::::::. query 3' CCUUACUUCGGACCAGGCU 5'	0.8	Query: 1 TCGGACCAGGCTTCATTCC 19 :|||||||||||||||:|| Sbjct: 1006 GGCCTGGTCCGAAGTAGGG 988
Sap-miR166a	isoform_2889	1	target 5' GGGAUGAAGCCUGGUCCGG 3' ::.:::::::::::::::. query 3' CCUUACUUCGGACCAGGCU 5'	0.8	Query: 1 TCGGACCAGGCTTCATTCC 19 :|||||||||||||||:|| Sbjct: 947 GGCCTGGTCCGAAGTAGGG 929
Sap-miR166a-3p	isoform_109978	2.5	target 5' CUGGAAUGAAGCCUGGUCCGG 3' ::::::::::::::::::. query 3' CCCCUUACUUCGGACCAGGCU 5'	1.2	Query: 1 TCGGACCAGGCTTCATTCCCC 21 :||||||||||||||||||** Sbjct: 1229 GGCCTGGTCCGAAGTAAGGTC 1209
Sap-miR166a-3p	isoform_129679	3	target 5' CUGGGAUGAAGCCUGGUCCGG 3' ::.:::::::::::::::. query 3' CCCCUUACUUCGGACCAGGCU 5'	1.8	Query: 1 TCGGACCAGGCTTCATTCCCC 21 :|||||||||||||||:||** Sbjct: 376 GGCCTGGTCCGAAGTAGGGTC 356
Sap-miR166a-3p	isoform_139360	2.5	target 5' CUGGAAUGAAGCCUGGUCCGG 3' ::::::::::::::::::. query 3' CCCCUUACUUCGGACCAGGCU 5'	1.2	Query: 1 TCGGACCAGGCTTCATTCCCC 21 :||||||||||||||||||** Sbjct: 1058 GGCCTGGTCCGAAGTAAGGTC 1038
Sap-miR166a-3p	isoform_1593	1.5	target 5' UGGGAAUGAAGCCUGGUCCGG 3' :::::::::::::::::::. query 3' CCCCUUACUUCGGACCAGGCU 5'	0.8	Query: 1 TCGGACCAGGCTTCATTCCCC 21 :|||||||||||||||||||* Sbjct: 1282 GGCCTGGTCCGAAGTAAGGGT 1262
Sap-miR166a-3p	isoform_1647	2.5	target 5' CUGGAAUGAAGCCUGGUCCGG 3' ::::::::::::::::::. query 3' CCCCUUACUUCGGACCAGGCU 5'	1.2	Query: 1 TCGGACCAGGCTTCATTCCCC 21 :||||||||||||||||||** Sbjct: 1285 GGCCTGGTCCGAAGTAAGGTC 1265
Sap-miR166a-3p	isoform_3353	3	target 5' CUGGGAUGAAGCCUGGUCCGG 3' ::.:::::::::::::::. query 3' CCCCUUACUUCGGACCAGGCU 5'	1.8	Query: 1 TCGGACCAGGCTTCATTCCCC 21 :|||||||||||||||:||** Sbjct: 875 GGCCTGGTCCGAAGTAGGGTC 855
Sap-miR166a-3p	isoform_3838	3	target 5' UUGGGAUGAAGCCUGGUCCGG 3' ::.:::::::::::::::. query 3' CCCCUUACUUCGGACCAGGCU 5'	1.8	Query: 1 TCGGACCAGGCTTCATTCCCC 21 :|||||||||||||||:||** Sbjct: 738 GGCCTGGTCCGAAGTAGGGTT 718
Sap-miR166a-3p	isoform_4214	3	target 5' CUGGGAUGAAGCCUGGUCCGG 3' ::.:::::::::::::::. query 3' CCCCUUACUUCGGACCAGGCU 5'	1.8	Query: 1 TCGGACCAGGCTTCATTCCCC 21 :|||||||||||||||:||** Sbjct: 761 GGCCTGGTCCGAAGTAGGGTC 741
Sap-miR166c	isoform_109978	1	target 5' CUGGAAUGAAGCCUGGUCCGG 3' :::: :::::::::::::::: query 3' GACCCUACUUCGGACCAGGCC 5'	1	Query: 1 CCGGACCAGGCTTCATCCCAG 21 ||||||||||||||||*|||| Sbjct: 1229 GGCCTGGTCCGAAGTAAGGTC 1209
Sap-miR166c	isoform_129679	0	target 5' CUGGGAUGAAGCCUGGUCCGG 3' ::::::::::::::::::::: query 3' GACCCUACUUCGGACCAGGCC 5'	0	Query: 1 CCGGACCAGGCTTCATCCCAG 21 ||||||||||||||||||||| Sbjct: 376 GGCCTGGTCCGAAGTAGGGTC 356
Sap-miR166c	isoform_139360	1	target 5' CUGGAAUGAAGCCUGGUCCGG 3' :::: :::::::::::::::: query 3' GACCCUACUUCGGACCAGGCC 5'	1	Query: 1 CCGGACCAGGCTTCATCCCAG 21 ||||||||||||||||*|||| Sbjct: 1058 GGCCTGGTCCGAAGTAAGGTC 1038
Sap-miR166c	isoform_172073	2.5	target 5' UUGGGAUGAAGCCUGGUCCAG 3' .:::::::::::::::::: : query 3' GACCCUACUUCGGACCAGGCC 5'	1.2	Query: 1 CCGGACCAGGCTTCATCCCAG 21 |*||||||||||||||||||: Sbjct: 911 GACCTGGTCCGAAGTAGGGTT 891
Sap-miR166c	isoform_1924	1	target 5' CUGGAAUGAAGCCUGGUCCGG 3' :::: :::::::::::::::: query 3' GACCCUACUUCGGACCAGGCC 5'	1	Query: 1 CCGGACCAGGCTTCATCCCAG 21 ||||||||||||||||*|||| Sbjct: 1224 GGCCTGGTCCGAAGTAAGGTC 1204
Sap-miR166c	isoform_4214	0	target 5' CUGGGAUGAAGCCUGGUCCGG 3' ::::::::::::::::::::: query 3' GACCCUACUUCGGACCAGGCC 5'	0	Query: 1 CCGGACCAGGCTTCATCCCAG 21 ||||||||||||||||||||| Sbjct: 761 GGCCTGGTCCGAAGTAGGGTC 741
Sap-miR166c	isoform_98977	1	target 5' CUGGAAUGAAGCCUGGUCCGG 3' :::: :::::::::::::::: query 3' GACCCUACUUCGGACCAGGCC 5'	1	Query: 1 CCGGACCAGGCTTCATCCCAG 21 ||||||||||||||||*|||| Sbjct: 1251 GGCCTGGTCCGAAGTAAGGTC 1231
Sap-miR166d-5p	isoform_18838	3.5	target 5' CCUUGGGGCAGACAACGUUCU 3' :::.:.: ::::::::.:::. query 3' GGAGCUCGGUCUGUUGUAAGG 5'	2.5	Query: 1 GGAATGTTGTCTGGCTCGAGG 21 :|||:||||||||*|:|:||| Sbjct: 641 TCTTGCAACAGACGGGGTTCC 621
Sap-miR166d-5p	isoform_20028	3.5	target 5' CCUUGGGGCAGACAACGUUCU 3' :::.:.: ::::::::.:::. query 3' GGAGCUCGGUCUGUUGUAAGG 5'	2.5	Query: 1 GGAATGTTGTCTGGCTCGAGG 21 :|||:||||||||*|:|:||| Sbjct: 648 TCTTGCAACAGACGGGGTTCC 628
Sap-miR166d-5p	isoform_23175	3.5	target 5' CCUUGGGGCAGACAACGUUCU 3' :::.:.: ::::::::.:::. query 3' GGAGCUCGGUCUGUUGUAAGG 5'	2.5	Query: 1 GGAATGTTGTCTGGCTCGAGG 21 :|||:||||||||*|:|:||| Sbjct: 525 TCTTGCAACAGACGGGGTTCC 505
Sap-miR166e	isoform_109978	2	target 5' CUGGAAUGAAGCCUGGUCC 3' ::::::::::::::::: query 3' CCCCUUACUUCGGACCAGG 5'	1	Query: 1 GGACCAGGCTTCATTCCCC 19 |||||||||||||||||** Sbjct: 1227 CCTGGTCCGAAGTAAGGTC 1209
Sap-miR166e	isoform_129679	2.5	target 5' CUGGGAUGAAGCCUGGUCC 3' ::.:::::::::::::: query 3' CCCCUUACUUCGGACCAGG 5'	1.5	Query: 1 GGACCAGGCTTCATTCCCC 19 ||||||||||||||:||** Sbjct: 374 CCTGGTCCGAAGTAGGGTC 356
Sap-miR166e	isoform_139360	2	target 5' CUGGAAUGAAGCCUGGUCC 3' ::::::::::::::::: query 3' CCCCUUACUUCGGACCAGG 5'	1	Query: 1 GGACCAGGCTTCATTCCCC 19 |||||||||||||||||** Sbjct: 1056 CCTGGTCCGAAGTAAGGTC 1038
Sap-miR166e	isoform_290365	2	target 5' CUGGAAUGAAGCCUGGUCC 3' ::::::::::::::::: query 3' CCCCUUACUUCGGACCAGG 5'	1	Query: 1 GGACCAGGCTTCATTCCCC 19 |||||||||||||||||** Sbjct: 378 CCTGGTCCGAAGTAAGGTC 360
Sap-miR166e	isoform_2986	2.5	target 5' CUGGGAUGAAGCCUGGUCC 3' ::.:::::::::::::: query 3' CCCCUUACUUCGGACCAGG 5'	1.5	Query: 1 GGACCAGGCTTCATTCCCC 19 ||||||||||||||:||** Sbjct: 872 CCTGGTCCGAAGTAGGGTC 854
Sap-miR166e	isoform_3837	2.5	target 5' CUGGGAUGAAGCCUGGUCC 3' ::.:::::::::::::: query 3' CCCCUUACUUCGGACCAGG 5'	1.5	Query: 1 GGACCAGGCTTCATTCCCC 19 ||||||||||||||:||** Sbjct: 784 CCTGGTCCGAAGTAGGGTC 766
Sap-miR166e	isoform_3838	2.5	target 5' UUGGGAUGAAGCCUGGUCC 3' ::.:::::::::::::: query 3' CCCCUUACUUCGGACCAGG 5'	1.5	Query: 1 GGACCAGGCTTCATTCCCC 19 ||||||||||||||:||** Sbjct: 736 CCTGGTCCGAAGTAGGGTT 718
Sap-miR166e	isoform_4214	2.5	target 5' CUGGGAUGAAGCCUGGUCC 3' ::.:::::::::::::: query 3' CCCCUUACUUCGGACCAGG 5'	1.5	Query: 1 GGACCAGGCTTCATTCCCC 19 ||||||||||||||:||** Sbjct: 759 CCTGGTCCGAAGTAGGGTC 741
Sap-miR166e	isoform_98977	2	target 5' CUGGAAUGAAGCCUGGUCC 3' ::::::::::::::::: query 3' CCCCUUACUUCGGACCAGG 5'	1	Query: 1 GGACCAGGCTTCATTCCCC 19 |||||||||||||||||** Sbjct: 1249 CCTGGTCCGAAGTAAGGTC 1231
Sap-miR166h-3p	isoform_109978	1.5	target 5' UGGAAUGAAGCCUGGUCCGG 3' ::::::::::::::::::. query 3' CCCUUACUUCGGACCAGGCU 5'	0.8	Query: 1 TCGGACCAGGCTTCATTCCC 20 :||||||||||||||||||* Sbjct: 1229 GGCCTGGTCCGAAGTAAGGT 1210
Sap-miR166h-3p	isoform_2849	2	target 5' UGGGAUGAAGCCUGGUCCGG 3' ::.:::::::::::::::. query 3' CCCUUACUUCGGACCAGGCU 5'	1.2	Query: 1 TCGGACCAGGCTTCATTCCC 20 :|||||||||||||||:||* Sbjct: 994 GGCCTGGTCCGAAGTAGGGT 975
Sap-miR166h-3p	isoform_2986	2	target 5' UGGGAUGAAGCCUGGUCCGG 3' ::.:::::::::::::::. query 3' CCCUUACUUCGGACCAGGCU 5'	1.2	Query: 1 TCGGACCAGGCTTCATTCCC 20 :|||||||||||||||:||* Sbjct: 874 GGCCTGGTCCGAAGTAGGGT 855
Sap-miR166h-3p	isoform_3289	2	target 5' UGGGAUGAAGCCUGGUCCGG 3' ::.:::::::::::::::. query 3' CCCUUACUUCGGACCAGGCU 5'	1.2	Query: 1 TCGGACCAGGCTTCATTCCC 20 :|||||||||||||||:||* Sbjct: 855 GGCCTGGTCCGAAGTAGGGT 836
Sap-miR166h-3p	isoform_3353	2	target 5' UGGGAUGAAGCCUGGUCCGG 3' ::.:::::::::::::::. query 3' CCCUUACUUCGGACCAGGCU 5'	1.2	Query: 1 TCGGACCAGGCTTCATTCCC 20 :|||||||||||||||:||* Sbjct: 875 GGCCTGGTCCGAAGTAGGGT 856
Sap-miR166h-3p	isoform_3837	2	target 5' UGGGAUGAAGCCUGGUCCGG 3' ::.:::::::::::::::. query 3' CCCUUACUUCGGACCAGGCU 5'	1.2	Query: 1 TCGGACCAGGCTTCATTCCC 20 :|||||||||||||||:||* Sbjct: 786 GGCCTGGTCCGAAGTAGGGT 767
Sap-miR166h-3p	isoform_3838	2	target 5' UGGGAUGAAGCCUGGUCCGG 3' ::.:::::::::::::::. query 3' CCCUUACUUCGGACCAGGCU 5'	1.2	Query: 1 TCGGACCAGGCTTCATTCCC 20 :|||||||||||||||:||* Sbjct: 738 GGCCTGGTCCGAAGTAGGGT 719
Sap-miR166h-3p	isoform_4214	2	target 5' UGGGAUGAAGCCUGGUCCGG 3' ::.:::::::::::::::. query 3' CCCUUACUUCGGACCAGGCU 5'	1.2	Query: 1 TCGGACCAGGCTTCATTCCC 20 :|||||||||||||||:||* Sbjct: 761 GGCCTGGTCCGAAGTAGGGT 742
Sap-miR166h-3p	isoform_98977	1.5	target 5' UGGAAUGAAGCCUGGUCCGG 3' ::::::::::::::::::. query 3' CCCUUACUUCGGACCAGGCU 5'	0.8	Query: 1 TCGGACCAGGCTTCATTCCC 20 :||||||||||||||||||* Sbjct: 1251 GGCCTGGTCCGAAGTAAGGT 1232
Sap-miR166m	isoform_109978	2	target 5' CUGGAAUGAAGCCUGGUCCG 3' :::::::::::::::::: query 3' CCCCUUACUUCGGACCAGGC 5'	1	Query: 1 CGGACCAGGCTTCATTCCCC 20 ||||||||||||||||||** Sbjct: 1228 GCCTGGTCCGAAGTAAGGTC 1209
Sap-miR166m	isoform_129679	2.5	target 5' CUGGGAUGAAGCCUGGUCCG 3' ::.::::::::::::::: query 3' CCCCUUACUUCGGACCAGGC 5'	1.5	Query: 1 CGGACCAGGCTTCATTCCCC 20 |||||||||||||||:||** Sbjct: 375 GCCTGGTCCGAAGTAGGGTC 356
Sap-miR166m	isoform_139360	2	target 5' CUGGAAUGAAGCCUGGUCCG 3' :::::::::::::::::: query 3' CCCCUUACUUCGGACCAGGC 5'	1	Query: 1 CGGACCAGGCTTCATTCCCC 20 ||||||||||||||||||** Sbjct: 1057 GCCTGGTCCGAAGTAAGGTC 1038
Sap-miR166m	isoform_2854	2.5	target 5' CUGGGAUGAAGCCUGGUCCG 3' ::.::::::::::::::: query 3' CCCCUUACUUCGGACCAGGC 5'	1.5	Query: 1 CGGACCAGGCTTCATTCCCC 20 |||||||||||||||:||** Sbjct: 1005 GCCTGGTCCGAAGTAGGGTC 986
Sap-miR166m	isoform_3289	2.5	target 5' UUGGGAUGAAGCCUGGUCCG 3' ::.::::::::::::::: query 3' CCCCUUACUUCGGACCAGGC 5'	1.5	Query: 1 CGGACCAGGCTTCATTCCCC 20 |||||||||||||||:||** Sbjct: 854 GCCTGGTCCGAAGTAGGGTT 835
Sap-miR166m	isoform_3353	2.5	target 5' CUGGGAUGAAGCCUGGUCCG 3' ::.::::::::::::::: query 3' CCCCUUACUUCGGACCAGGC 5'	1.5	Query: 1 CGGACCAGGCTTCATTCCCC 20 |||||||||||||||:||** Sbjct: 874 GCCTGGTCCGAAGTAGGGTC 855
Sap-miR166m	isoform_3837	2.5	target 5' CUGGGAUGAAGCCUGGUCCG 3' ::.::::::::::::::: query 3' CCCCUUACUUCGGACCAGGC 5'	1.5	Query: 1 CGGACCAGGCTTCATTCCCC 20 |||||||||||||||:||** Sbjct: 785 GCCTGGTCCGAAGTAGGGTC 766
Sap-miR166m	isoform_3838	2.5	target 5' UUGGGAUGAAGCCUGGUCCG 3' ::.::::::::::::::: query 3' CCCCUUACUUCGGACCAGGC 5'	1.5	Query: 1 CGGACCAGGCTTCATTCCCC 20 |||||||||||||||:||** Sbjct: 737 GCCTGGTCCGAAGTAGGGTT 718
Sap-miR166m	isoform_4214	2.5	target 5' CUGGGAUGAAGCCUGGUCCG 3' ::.::::::::::::::: query 3' CCCCUUACUUCGGACCAGGC 5'	1.5	Query: 1 CGGACCAGGCTTCATTCCCC 20 |||||||||||||||:||** Sbjct: 760 GCCTGGTCCGAAGTAGGGTC 741
Sap-miR166m	isoform_98977	2	target 5' CUGGAAUGAAGCCUGGUCCG 3' :::::::::::::::::: query 3' CCCCUUACUUCGGACCAGGC 5'	1	Query: 1 CGGACCAGGCTTCATTCCCC 20 ||||||||||||||||||** Sbjct: 1250 GCCTGGTCCGAAGTAAGGTC 1231
Sap-miR168a-5p	isoform_1532	3	target 5' UUCCCGAGCUGCACCAAGCUA 3' ::::::: ::::::::::: : query 3' AAGGGCUGGACGUGGUUCGCU 5'	2	Query: 1 TCGCTTGGTGCAGGTCGGGAA 21 |*|||||||||||*||||||| Sbjct: 430 ATCGAACCACGTCGAGCCCTT 410
Sap-miR168a-5p	isoform_191487	3	target 5' UUCCCGAGCUGCACCAAGCUA 3' ::::::: ::::::::::: : query 3' AAGGGCUGGACGUGGUUCGCU 5'	2	Query: 1 TCGCTTGGTGCAGGTCGGGAA 21 |*|||||||||||*||||||| Sbjct: 461 ATCGAACCACGTCGAGCCCTT 441
Sap-miR169a-3p	isoform_123012	3	target 5' UAUAGUGGAGAACAACUUGCC 3' : :::. .::::::::::::: query 3' ACAUCGGUUCUUGUUGAACGG 5'	2.5	Query: 1 GGCAAGTTGTTCTTGGCTACA 21 |||||||||||||:*:|||*| Sbjct: 605 CCGTTCAACAAGAGGTGATAT 585
Sap-miR169a-3p	isoform_1463	3.5	target 5' GUUGGACAAGAACAACUUGCC 3' :.: ::::::::::::::: query 3' ACAUCGGUUCUUGUUGAACGG 5'	1.8	Query: 1 GGCAAGTTGTTCTTGGCTACA 21 |||||||||||||||*|:|*| Sbjct: 1121 CCGTTCAACAAGAACAGGT-T 1102
Sap-miR169a-3p	isoform_171913	3.5	target 5' UGUGUGCUGAGAACAACUUGUC 3' :::. ::..:::::::::::.: query 3' ACAU-CGGUUCUUGUUGAACGG 5'	2	Query: 1 GGCAAGTTGTTCTTGGCTACA 21 |:|||||||||||::||*||| Sbjct: 276 CTGTTCAACAAGAGTCG-TGT 257
Sap-miR169a-3p	isoform_213811	3	target 5' UAUAGUGGAGAACAACUUGCC 3' : :::. .::::::::::::: query 3' ACAUCGGUUCUUGUUGAACGG 5'	2.5	Query: 1 GGCAAGTTGTTCTTGGCTACA 21 |||||||||||||:*:|||*| Sbjct: 3578 CCGTTCAACAAGAGGTGATAT 3558
Sap-miR169a-3p	isoform_246	3	target 5' UAUAGUGGAGAACAACUUGCC 3' : :::. .::::::::::::: query 3' ACAUCGGUUCUUGUUGAACGG 5'	2.5	Query: 1 GGCAAGTTGTTCTTGGCTACA 21 |||||||||||||:*:|||*| Sbjct: 4240 CCGTTCAACAAGAGGTGATAT 4220
Sap-miR169a-3p	isoform_28168	3	target 5' UAUAGUGGAGAACAACUUGCC 3' : :::. .::::::::::::: query 3' ACAUCGGUUCUUGUUGAACGG 5'	2.5	Query: 1 GGCAAGTTGTTCTTGGCTACA 21 |||||||||||||:*:|||*| Sbjct: 1363 CCGTTCAACAAGAGGTGATAT 1343
Sap-miR169a-3p	isoform_876	3.5	target 5' GUUGGACAAGAACAACUUGCC 3' :.: ::::::::::::::: query 3' ACAUCGGUUCUUGUUGAACGG 5'	1.8	Query: 1 GGCAAGTTGTTCTTGGCTACA 21 |||||||||||||||*|:|*| Sbjct: 1089 CCGTTCAACAAGAACAGGT-T 1070
Sap-miR169a-5p	isoform_109911	3	target 5' GCGGCAAUUCAUCCUUGGCUU 3' :::::: :::::::::::: query 3' AGCCGUUCAGUAGGAACCGAC 5'	2	Query: 1 CAGCCAAGGATGACTTGCCGA 21 *||||||||||||*||||||* Sbjct: 1043 TTCGGTTCCTACTTAACGGCG 1023
Sap-miR169a-5p	isoform_128772	3	target 5' GCGGCAAUUCAUCCUUGGCUU 3' :::::: :::::::::::: query 3' AGCCGUUCAGUAGGAACCGAC 5'	2	Query: 1 CAGCCAAGGATGACTTGCCGA 21 *||||||||||||*||||||* Sbjct: 1137 TTCGGTTCCTACTTAACGGCG 1117
Sap-miR169a-5p	isoform_239175	3	target 5' GCGGCAAUUCAUCCUUGGCUU 3' :::::: :::::::::::: query 3' AGCCGUUCAGUAGGAACCGAC 5'	2	Query: 1 CAGCCAAGGATGACTTGCCGA 21 *||||||||||||*||||||* Sbjct: 1750 TTCGGTTCCTACTTAACGGCG 1730
Sap-miR169a-5p	isoform_285675	3	target 5' GCGGCAAUUCAUCCUUGGCUU 3' :::::: :::::::::::: query 3' AGCCGUUCAGUAGGAACCGAC 5'	2	Query: 1 CAGCCAAGGATGACTTGCCGA 21 *||||||||||||*||||||* Sbjct: 1291 TTCGGTTCCTACTTAACGGCG 1271
Sap-miR169a-5p	isoform_286296	3	target 5' GCGGCAAUUCAUCCUUGGCUU 3' :::::: :::::::::::: query 3' AGCCGUUCAGUAGGAACCGAC 5'	2	Query: 1 CAGCCAAGGATGACTTGCCGA 21 *||||||||||||*||||||* Sbjct: 1774 TTCGGTTCCTACTTAACGGCG 1754
Sap-miR169a-5p	isoform_32607	3	target 5' GCGGCAAUUCAUCCUUGGCUU 3' :::::: :::::::::::: query 3' AGCCGUUCAGUAGGAACCGAC 5'	2	Query: 1 CAGCCAAGGATGACTTGCCGA 21 *||||||||||||*||||||* Sbjct: 1291 TTCGGTTCCTACTTAACGGCG 1271
Sap-miR169a-5p	isoform_36896	3	target 5' GCGGCAAUUCAUCCUUGGCUU 3' :::::: :::::::::::: query 3' AGCCGUUCAGUAGGAACCGAC 5'	2	Query: 1 CAGCCAAGGATGACTTGCCGA 21 *||||||||||||*||||||* Sbjct: 1188 TTCGGTTCCTACTTAACGGCG 1168
Sap-miR169a-5p	isoform_39759	3	target 5' GCGGCAAUUCAUCCUUGGCUU 3' :::::: :::::::::::: query 3' AGCCGUUCAGUAGGAACCGAC 5'	2	Query: 1 CAGCCAAGGATGACTTGCCGA 21 *||||||||||||*||||||* Sbjct: 1155 TTCGGTTCCTACTTAACGGCG 1135
Sap-miR169a-5p	isoform_40668	3	target 5' GCGGCAAUUCAUCCUUGGCUU 3' :::::: :::::::::::: query 3' AGCCGUUCAGUAGGAACCGAC 5'	2	Query: 1 CAGCCAAGGATGACTTGCCGA 21 *||||||||||||*||||||* Sbjct: 1139 TTCGGTTCCTACTTAACGGCG 1119
Sap-miR169b-5p	isoform_108619	3.5	target 5' UCGGCAAGUUGUCCUUGGCUA 3' .::::::::..::::::::: query 3' GGCCGUUCAGUAGGAACCGAC 5'	1.8	Query: 1 CAGCCAAGGATGACTTGCCGG 21 *|||||||||::||||||||: Sbjct: 160 ATCGGTTCCTGTTGAACGGCT 140
Sap-miR169b-5p	isoform_109911	3	target 5' GCGGCAAUUCAUCCUUGGCUU 3' :::::: :::::::::::: query 3' GGCCGUUCAGUAGGAACCGAC 5'	2	Query: 1 CAGCCAAGGATGACTTGCCG-G 21 *||||||||||||*||||||*| Sbjct: 1043 TTCGGTTCCTACTTAACGGCGC 1022
Sap-miR169b-5p	isoform_128772	3	target 5' GCGGCAAUUCAUCCUUGGCUU 3' :::::: :::::::::::: query 3' GGCCGUUCAGUAGGAACCGAC 5'	2	Query: 1 CAGCCAAGGATGACTTGCCG-G 21 *||||||||||||*||||||*| Sbjct: 1137 TTCGGTTCCTACTTAACGGCGC 1116
Sap-miR169b-5p	isoform_185944	3.5	target 5' CUGGCAACUCAUUCUUGGCUC 3' :.::::: ::::.::::::: query 3' GGCCGUUCAGUAGGAACCGAC 5'	2.2	Query: 1 CAGCCAAGGATGACTTGCCGG 21 *|||||||:||||*|||||:| Sbjct: 2894 CTCGGTTCTTACTCAACGGTC 2874
Sap-miR169b-5p	isoform_285675	3	target 5' GCGGCAAUUCAUCCUUGGCUU 3' :::::: :::::::::::: query 3' GGCCGUUCAGUAGGAACCGAC 5'	2	Query: 1 CAGCCAAGGATGACTTGCCG-G 21 *||||||||||||*||||||*| Sbjct: 1291 TTCGGTTCCTACTTAACGGCGC 1270
Sap-miR169b-5p	isoform_39759	3	target 5' GCGGCAAUUCAUCCUUGGCUU 3' :::::: :::::::::::: query 3' GGCCGUUCAGUAGGAACCGAC 5'	2	Query: 1 CAGCCAAGGATGACTTGCCG-G 21 *||||||||||||*||||||*| Sbjct: 1155 TTCGGTTCCTACTTAACGGCGC 1134
Sap-miR169b-5p	isoform_40668	3	target 5' GCGGCAAUUCAUCCUUGGCUU 3' :::::: :::::::::::: query 3' GGCCGUUCAGUAGGAACCGAC 5'	2	Query: 1 CAGCCAAGGATGACTTGCCG-G 21 *||||||||||||*||||||*| Sbjct: 1139 TTCGGTTCCTACTTAACGGCGC 1118
Sap-miR169b-5p	isoform_51977	3	target 5' CCGGCAACUCAUUCUUGGCUU 3' ::::::: ::::.::::::: query 3' GGCCGUUCAGUAGGAACCGAC 5'	2	Query: 1 CAGCCAAGGATGACTTGCCGG 21 *|||||||:||||*||||||| Sbjct: 959 TTCGGTTCTTACTCAACGGCC 939
Sap-miR169b-5p	isoform_75756	3	target 5' CAGGCAAGUCAUCCUUGGCUA 3' : :::::::::::::::::: query 3' GGCCGUUCAGUAGGAACCGAC 5'	1	Query: 1 CAGCCAAGGATGACTTGCCGG 21 *|||||||||||||||*||*| Sbjct: 415 ATCGGTTCCTACTGAAGGGAC 395
Sap-miR169d-5p	isoform_109911	3	target 5' CGGCAAUUCAUCCUUGGCUU 3' ::::: :::::::::::: query 3' UCCGUUCAGUAGGAACCGAU 5'	2	Query: 1 TAGCCAAGGATGACTTGCCT 20 *||||||||||||*|||||* Sbjct: 1043 TTCGGTTCCTACTTAACGGC 1024
Sap-miR169d-5p	isoform_128772	3	target 5' CGGCAAUUCAUCCUUGGCUU 3' ::::: :::::::::::: query 3' UCCGUUCAGUAGGAACCGAU 5'	2	Query: 1 TAGCCAAGGATGACTTGCCT 20 *||||||||||||*|||||* Sbjct: 1137 TTCGGTTCCTACTTAACGGC 1118
Sap-miR169d-5p	isoform_239175	3	target 5' CGGCAAUUCAUCCUUGGCUU 3' ::::: :::::::::::: query 3' UCCGUUCAGUAGGAACCGAU 5'	2	Query: 1 TAGCCAAGGATGACTTGCCT 20 *||||||||||||*|||||* Sbjct: 1750 TTCGGTTCCTACTTAACGGC 1731
Sap-miR169d-5p	isoform_36846	3	target 5' AGGCAAAUCAUUCUUGGCUC 3' :::::: ::::.::::::: query 3' UCCGUUCAGUAGGAACCGAU 5'	2	Query: 1 TAGCCAAGGATGACTTGCCT 20 *|||||||:||||*|||||| Sbjct: 1125 CTCGGTTCTTACTAAACGGA 1106
Sap-miR169d-5p	isoform_36896	3	target 5' CGGCAAUUCAUCCUUGGCUU 3' ::::: :::::::::::: query 3' UCCGUUCAGUAGGAACCGAU 5'	2	Query: 1 TAGCCAAGGATGACTTGCCT 20 *||||||||||||*|||||* Sbjct: 1188 TTCGGTTCCTACTTAACGGC 1169
Sap-miR169d-5p	isoform_39759	3	target 5' CGGCAAUUCAUCCUUGGCUU 3' ::::: :::::::::::: query 3' UCCGUUCAGUAGGAACCGAU 5'	2	Query: 1 TAGCCAAGGATGACTTGCCT 20 *||||||||||||*|||||* Sbjct: 1155 TTCGGTTCCTACTTAACGGC 1136
Sap-miR169d-5p	isoform_40668	3	target 5' CGGCAAUUCAUCCUUGGCUU 3' ::::: :::::::::::: query 3' UCCGUUCAGUAGGAACCGAU 5'	2	Query: 1 TAGCCAAGGATGACTTGCCT 20 *||||||||||||*|||||* Sbjct: 1139 TTCGGTTCCTACTTAACGGC 1120
Sap-miR169d-5p	isoform_44135	2	target 5' AGGCAAAUCAUCCUUGGCUU 3' :::::: :::::::::::: query 3' UCCGUUCAGUAGGAACCGAU 5'	1.5	Query: 1 TAGCCAAGGATGACTTGCCT 20 *||||||||||||*|||||| Sbjct: 1233 TTCGGTTCCTACTAAACGGA 1214
Sap-miR169d-5p	isoform_75756	1	target 5' AGGCAAGUCAUCCUUGGCUA 3' :::::::::::::::::::: query 3' UCCGUUCAGUAGGAACCGAU 5'	0	Query: 1 TAGCCAAGGATGACTTGCCT 20 ||||||||||||||||*||| Sbjct: 415 ATCGGTTCCTACTGAAGGGA 396
Sap-miR169e	isoform_109911	3	target 5' GCGGCAAUUCAUCCUUGGCU 3' :::::: :::::::::::: query 3' GGCCGUUCAGUAGGAACCGA 5'	1.5	Query: 1 AGCCAAGGATGACTTGCCG-G 20 ||||||||||||*||||||*| Sbjct: 1042 TCGGTTCCTACTTAACGGCGC 1022
Sap-miR169e	isoform_128772	3	target 5' GCGGCAAUUCAUCCUUGGCU 3' :::::: :::::::::::: query 3' GGCCGUUCAGUAGGAACCGA 5'	1.5	Query: 1 AGCCAAGGATGACTTGCCG-G 20 ||||||||||||*||||||*| Sbjct: 1136 TCGGTTCCTACTTAACGGCGC 1116
Sap-miR169e	isoform_185944	3.5	target 5' CUGGCAACUCAUUCUUGGCU 3' :.::::: ::::.::::::: query 3' GGCCGUUCAGUAGGAACCGA 5'	1.8	Query: 1 AGCCAAGGATGACTTGCCGG 20 |||||||:||||*|||||:| Sbjct: 2893 TCGGTTCTTACTCAACGGTC 2874
Sap-miR169e	isoform_239175	3	target 5' GCGGCAAUUCAUCCUUGGCU 3' :::::: :::::::::::: query 3' GGCCGUUCAGUAGGAACCGA 5'	1.5	Query: 1 AGCCAAGGATGACTTGCCG-G 20 ||||||||||||*||||||*| Sbjct: 1749 TCGGTTCCTACTTAACGGCGC 1729
Sap-miR169e	isoform_285675	3	target 5' GCGGCAAUUCAUCCUUGGCU 3' :::::: :::::::::::: query 3' GGCCGUUCAGUAGGAACCGA 5'	1.5	Query: 1 AGCCAAGGATGACTTGCCG-G 20 ||||||||||||*||||||*| Sbjct: 1290 TCGGTTCCTACTTAACGGCGC 1270
Sap-miR169e	isoform_32607	3	target 5' GCGGCAAUUCAUCCUUGGCU 3' :::::: :::::::::::: query 3' GGCCGUUCAGUAGGAACCGA 5'	1.5	Query: 1 AGCCAAGGATGACTTGCCG-G 20 ||||||||||||*||||||*| Sbjct: 1290 TCGGTTCCTACTTAACGGCGC 1270
Sap-miR169e	isoform_39759	3	target 5' GCGGCAAUUCAUCCUUGGCU 3' :::::: :::::::::::: query 3' GGCCGUUCAGUAGGAACCGA 5'	1.5	Query: 1 AGCCAAGGATGACTTGCCG-G 20 ||||||||||||*||||||*| Sbjct: 1154 TCGGTTCCTACTTAACGGCGC 1134
Sap-miR169e	isoform_40668	3	target 5' GCGGCAAUUCAUCCUUGGCU 3' :::::: :::::::::::: query 3' GGCCGUUCAGUAGGAACCGA 5'	1.5	Query: 1 AGCCAAGGATGACTTGCCG-G 20 ||||||||||||*||||||*| Sbjct: 1138 TCGGTTCCTACTTAACGGCGC 1118
Sap-miR169e	isoform_75756	2	target 5' CAGGCAAGUCAUCCUUGGCU 3' : :::::::::::::::::: query 3' GGCCGUUCAGUAGGAACCGA 5'	0.5	Query: 1 AGCCAAGGATGACTTGCCGG 20 |||||||||||||||*||*| Sbjct: 414 TCGGTTCCTACTGAAGGGAC 395
Sap-miR169h	isoform_108619	3.5	target 5' UCGGCAAGUUGUCCUUGGCUA 3' . :::::::..:::::::::: query 3' GUCCGUUCAGUAGGAACCGAU 5'	1.5	Query: 1 TAGCCAAGGATGACTTGCCTG 21 ||||||||||::|||||||*| Sbjct: 160 ATCGGTTCCTGTTGAACGG-C 141
Sap-miR169h	isoform_109911	3.5	target 5' CGCGGCAAUUCAUCCUUGGCUU 3' :. ::::: :::::::::::: query 3' GU-CCGUUCAGUAGGAACCGAU 5'	2	Query: 1 TAGCCAAGGATGACTTGCCTG 21 *||||||||||||*|||||*| Sbjct: 1043 TTCGGTTCCTACTTAACGG-C 1024
Sap-miR169h	isoform_111749	3	target 5' AAGGCAAAUCAUCCUUGGCUU 3' :::::: :::::::::::: query 3' GUCCGUUCAGUAGGAACCGAU 5'	2	Query: 1 TAGCCAAGGATGACTTGCC-TG 21 *||||||||||||*|||||*|| Sbjct: 1194 TTCGGTTCCTACTAAACGGAAC 1173
Sap-miR169h	isoform_128772	3.5	target 5' CGCGGCAAUUCAUCCUUGGCUU 3' :. ::::: :::::::::::: query 3' GU-CCGUUCAGUAGGAACCGAU 5'	2	Query: 1 TAGCCAAGGATGACTTGCCTG 21 *||||||||||||*|||||*| Sbjct: 1137 TTCGGTTCCTACTTAACGG-C 1118
Sap-miR169h	isoform_285675	3.5	target 5' CGCGGCAAUUCAUCCUUGGCUU 3' :. ::::: :::::::::::: query 3' GU-CCGUUCAGUAGGAACCGAU 5'	2	Query: 1 TAGCCAAGGATGACTTGCCTG 21 *||||||||||||*|||||*| Sbjct: 1291 TTCGGTTCCTACTTAACGG-C 1272
Sap-miR169h	isoform_32607	3.5	target 5' CGCGGCAAUUCAUCCUUGGCUU 3' :. ::::: :::::::::::: query 3' GU-CCGUUCAGUAGGAACCGAU 5'	2	Query: 1 TAGCCAAGGATGACTTGCCTG 21 *||||||||||||*|||||*| Sbjct: 1291 TTCGGTTCCTACTTAACGG-C 1272
Sap-miR169h	isoform_39759	3.5	target 5' CGCGGCAAUUCAUCCUUGGCUU 3' :. ::::: :::::::::::: query 3' GU-CCGUUCAGUAGGAACCGAU 5'	2	Query: 1 TAGCCAAGGATGACTTGCCTG 21 *||||||||||||*|||||*| Sbjct: 1155 TTCGGTTCCTACTTAACGG-C 1136
Sap-miR169h	isoform_40668	3.5	target 5' CGCGGCAAUUCAUCCUUGGCUU 3' :. ::::: :::::::::::: query 3' GU-CCGUUCAGUAGGAACCGAU 5'	2	Query: 1 TAGCCAAGGATGACTTGCCTG 21 *||||||||||||*|||||*| Sbjct: 1139 TTCGGTTCCTACTTAACGG-C 1120
Sap-miR169r-3p	isoform_102395	3	target 5' UGCAGCCAAGGAUGACUUGCC 3' :: :::::::::..::::::: query 3' ACAUCGGUUCCUGUUGAACGG 5'	1.5	Query: 1 GGCAAGTTGTCCTTGGCTACA 21 |||||||::|||||||||*|| Sbjct: 46 CCGTTCAGTAGGAACCGACGT 26
Sap-miR169r-3p	isoform_102558	3	target 5' UGCAGCCAAGGAUGACUUGCC 3' :: :::::::::..::::::: query 3' ACAUCGGUUCCUGUUGAACGG 5'	1.5	Query: 1 GGCAAGTTGTCCTTGGCTACA 21 |||||||::|||||||||*|| Sbjct: 88 CCGTTCAGTAGGAACCGACGT 68
Sap-miR169r-3p	isoform_105837	3	target 5' UGCAGCCAAGGAUGACUUGCC 3' :: :::::::::..::::::: query 3' ACAUCGGUUCCUGUUGAACGG 5'	1.5	Query: 1 GGCAAGTTGTCCTTGGCTACA 21 |||||||::|||||||||*|| Sbjct: 30 CCGTTCAGTAGGAACCGACGT 10
Sap-miR169r-3p	isoform_253042	3	target 5' UGCAGCCAAGGAUGACUUGCC 3' :: :::::::::..::::::: query 3' ACAUCGGUUCCUGUUGAACGG 5'	1.5	Query: 1 GGCAAGTTGTCCTTGGCTACA 21 |||||||::|||||||||*|| Sbjct: 182 CCGTTCAGTAGGAACCGACGT 162
Sap-miR169r-3p	isoform_254628	3	target 5' UGCAGCCAAGGAUGACUUGCC 3' :: :::::::::..::::::: query 3' ACAUCGGUUCCUGUUGAACGG 5'	1.5	Query: 1 GGCAAGTTGTCCTTGGCTACA 21 |||||||::|||||||||*|| Sbjct: 100 CCGTTCAGTAGGAACCGACGT 80
Sap-miR169r-3p	isoform_76997	3	target 5' UGCAGCCAAGGAUGACUUGCC 3' :: :::::::::..::::::: query 3' ACAUCGGUUCCUGUUGAACGG 5'	1.5	Query: 1 GGCAAGTTGTCCTTGGCTACA 21 |||||||::|||||||||*|| Sbjct: 83 CCGTTCAGTAGGAACCGACGT 63
Sap-miR169r-3p	isoform_78529	3	target 5' UGCAGCCAAGGAUGACUUGCC 3' :: :::::::::..::::::: query 3' ACAUCGGUUCCUGUUGAACGG 5'	1.5	Query: 1 GGCAAGTTGTCCTTGGCTACA 21 |||||||::|||||||||*|| Sbjct: 100 CCGTTCAGTAGGAACCGACGT 80
Sap-miR169r-3p	isoform_82750	3	target 5' UGCAGCCAAGGAUGACUUGCC 3' :: :::::::::..::::::: query 3' ACAUCGGUUCCUGUUGAACGG 5'	1.5	Query: 1 GGCAAGTTGTCCTTGGCTACA 21 |||||||::|||||||||*|| Sbjct: 96 CCGTTCAGTAGGAACCGACGT 76
Sap-miR169r-3p	isoform_85464	3	target 5' UGCAGCCAAGGAUGACUUGCC 3' :: :::::::::..::::::: query 3' ACAUCGGUUCCUGUUGAACGG 5'	1.5	Query: 1 GGCAAGTTGTCCTTGGCTACA 21 |||||||::|||||||||*|| Sbjct: 92 CCGTTCAGTAGGAACCGACGT 72
Sap-miR169v	isoform_101209	3	target 5' GGCAAUUCAUUCUUGGCUU 3' ::::: ::::.::::::: query 3' CCGUUCAGUAGGAACCGAC 5'	2	Query: 1 CAGCCAAGGATGACTTGCC 19 *|||||||:||||*||||| Sbjct: 556 TTCGGTTCTTACTTAACGG 538
Sap-miR169v	isoform_109911	2	target 5' GGCAAUUCAUCCUUGGCUU 3' ::::: :::::::::::: query 3' CCGUUCAGUAGGAACCGAC 5'	1.5	Query: 1 CAGCCAAGGATGACTTGCC 19 *||||||||||||*||||| Sbjct: 1043 TTCGGTTCCTACTTAACGG 1025
Sap-miR169v	isoform_128772	2	target 5' GGCAAUUCAUCCUUGGCUU 3' ::::: :::::::::::: query 3' CCGUUCAGUAGGAACCGAC 5'	1.5	Query: 1 CAGCCAAGGATGACTTGCC 19 *||||||||||||*||||| Sbjct: 1137 TTCGGTTCCTACTTAACGG 1119
Sap-miR169v	isoform_185944	3	target 5' GGCAACUCAUUCUUGGCUC 3' ::::: ::::.::::::: query 3' CCGUUCAGUAGGAACCGAC 5'	2	Query: 1 CAGCCAAGGATGACTTGCC 19 *|||||||:||||*||||| Sbjct: 2894 CTCGGTTCTTACTCAACGG 2876
Sap-miR169v	isoform_239175	2	target 5' GGCAAUUCAUCCUUGGCUU 3' ::::: :::::::::::: query 3' CCGUUCAGUAGGAACCGAC 5'	1.5	Query: 1 CAGCCAAGGATGACTTGCC 19 *||||||||||||*||||| Sbjct: 1750 TTCGGTTCCTACTTAACGG 1732
Sap-miR169v	isoform_285675	2	target 5' GGCAAUUCAUCCUUGGCUU 3' ::::: :::::::::::: query 3' CCGUUCAGUAGGAACCGAC 5'	1.5	Query: 1 CAGCCAAGGATGACTTGCC 19 *||||||||||||*||||| Sbjct: 1291 TTCGGTTCCTACTTAACGG 1273
Sap-miR169v	isoform_32607	2	target 5' GGCAAUUCAUCCUUGGCUU 3' ::::: :::::::::::: query 3' CCGUUCAGUAGGAACCGAC 5'	1.5	Query: 1 CAGCCAAGGATGACTTGCC 19 *||||||||||||*||||| Sbjct: 1291 TTCGGTTCCTACTTAACGG 1273
Sap-miR169v	isoform_39759	2	target 5' GGCAAUUCAUCCUUGGCUU 3' ::::: :::::::::::: query 3' CCGUUCAGUAGGAACCGAC 5'	1.5	Query: 1 CAGCCAAGGATGACTTGCC 19 *||||||||||||*||||| Sbjct: 1155 TTCGGTTCCTACTTAACGG 1137
Sap-miR169v	isoform_40668	2	target 5' GGCAAUUCAUCCUUGGCUU 3' ::::: :::::::::::: query 3' CCGUUCAGUAGGAACCGAC 5'	1.5	Query: 1 CAGCCAAGGATGACTTGCC 19 *||||||||||||*||||| Sbjct: 1139 TTCGGTTCCTACTTAACGG 1121
Sap-miR171	isoform_101781	3	target 5' GCUGAUAUUGGCGCGGCUCAA 3' : :::::::.:::::::::: query 3' CCUCUAUAACUGCGCCGAGUU 5'	1.5	Query: 1 TTGAGCCGCGTCAATATCTCC 21 ||||||||||:|||||||**| Sbjct: 712 AACTCGGCGCGGTTATAGTCG 692
Sap-miR171	isoform_103273	2.5	target 5' AGGGAUAUUGGCGCGGCUCAA 3' :.:::::::.:::::::::: query 3' CCUCUAUAACUGCGCCGAGUU 5'	1	Query: 1 TTGAGCCGCGTCAATATCTCC 21 ||||||||||:|||||||*|| Sbjct: 998 AACTCGGCGCGGTTATAG-GG 979
Sap-miR171	isoform_103580	2.5	target 5' AGGGAUAUUGGCGCGGCUCAA 3' :.:::::::.:::::::::: query 3' CCUCUAUAACUGCGCCGAGUU 5'	1	Query: 1 TTGAGCCGCGTCAATATCTCC 21 ||||||||||:|||||||*|| Sbjct: 1102 AACTCGGCGCGGTTATAG-GG 1083
Sap-miR171	isoform_116540	2.5	target 5' AGGGAUAUUGGCGCGGCUCAA 3' :.:::::::.:::::::::: query 3' CCUCUAUAACUGCGCCGAGUU 5'	1	Query: 1 TTGAGCCGCGTCAATATCTCC 21 ||||||||||:|||||||*|| Sbjct: 1610 AACTCGGCGCGGTTATAG-GG 1591
Sap-miR171	isoform_35714	2.5	target 5' AGGGAUAUUGGCGCGGCUCAA 3' :.:::::::.:::::::::: query 3' CCUCUAUAACUGCGCCGAGUU 5'	1	Query: 1 TTGAGCCGCGTCAATATCTCC 21 ||||||||||:|||||||*|| Sbjct: 131 AACTCGGCGCGGTTATAG-GG 112
Sap-miR171	isoform_40023	2.5	target 5' AGGGAUAUUGGCGCGGCUCAA 3' :.:::::::.:::::::::: query 3' CCUCUAUAACUGCGCCGAGUU 5'	1	Query: 1 TTGAGCCGCGTCAATATCTCC 21 ||||||||||:|||||||*|| Sbjct: 131 AACTCGGCGCGGTTATAG-GG 112
Sap-miR171	isoform_4178	2.5	target 5' AGGGAUAUUGGCGCGGCUCAA 3' :.:::::::.:::::::::: query 3' CCUCUAUAACUGCGCCGAGUU 5'	1	Query: 1 TTGAGCCGCGTCAATATCTCC 21 ||||||||||:|||||||*|| Sbjct: 1638 AACTCGGCGCGGTTATAG-GG 1619
Sap-miR171	isoform_42703	2.5	target 5' AGGGAUAUUGGCGCGGCUCAA 3' :.:::::::.:::::::::: query 3' CCUCUAUAACUGCGCCGAGUU 5'	1	Query: 1 TTGAGCCGCGTCAATATCTCC 21 ||||||||||:|||||||*|| Sbjct: 131 AACTCGGCGCGGTTATAG-GG 112
Sap-miR171	isoform_9371	3	target 5' GCUGAUAUUGGCGCGGCUCAA 3' : :::::::.:::::::::: query 3' CCUCUAUAACUGCGCCGAGUU 5'	1.5	Query: 1 TTGAGCCGCGTCAATATCTCC 21 ||||||||||:|||||||**| Sbjct: 993 AACTCGGCGCGGTTATAGTCG 973
Sap-miR171a-3p	isoform_101781	0	target 5' AUAUUGGCGCGGCUCAAUCA 3' :::::::::::::::::::: query 3' UAUAACCGCGCCGAGUUAGU 5'	0	Query: 1 TGATTGAGCCGCGCCAATAT 20 |||||||||||||||||||| Sbjct: 715 ACTAACTCGGCGCGGTTATA 696
Sap-miR171a-3p	isoform_103273	0	target 5' AUAUUGGCGCGGCUCAAUCA 3' :::::::::::::::::::: query 3' UAUAACCGCGCCGAGUUAGU 5'	0	Query: 1 TGATTGAGCCGCGCCAATAT 20 |||||||||||||||||||| Sbjct: 1001 ACTAACTCGGCGCGGTTATA 982
Sap-miR171a-3p	isoform_103580	0	target 5' AUAUUGGCGCGGCUCAAUCA 3' :::::::::::::::::::: query 3' UAUAACCGCGCCGAGUUAGU 5'	0	Query: 1 TGATTGAGCCGCGCCAATAT 20 |||||||||||||||||||| Sbjct: 1105 ACTAACTCGGCGCGGTTATA 1086
Sap-miR171a-3p	isoform_35714	0	target 5' AUAUUGGCGCGGCUCAAUCA 3' :::::::::::::::::::: query 3' UAUAACCGCGCCGAGUUAGU 5'	0	Query: 1 TGATTGAGCCGCGCCAATAT 20 |||||||||||||||||||| Sbjct: 134 ACTAACTCGGCGCGGTTATA 115
Sap-miR171a-3p	isoform_40023	0	target 5' AUAUUGGCGCGGCUCAAUCA 3' :::::::::::::::::::: query 3' UAUAACCGCGCCGAGUUAGU 5'	0	Query: 1 TGATTGAGCCGCGCCAATAT 20 |||||||||||||||||||| Sbjct: 134 ACTAACTCGGCGCGGTTATA 115
Sap-miR171a-3p	isoform_4178	0	target 5' AUAUUGGCGCGGCUCAAUCA 3' :::::::::::::::::::: query 3' UAUAACCGCGCCGAGUUAGU 5'	0	Query: 1 TGATTGAGCCGCGCCAATAT 20 |||||||||||||||||||| Sbjct: 1641 ACTAACTCGGCGCGGTTATA 1622
Sap-miR171a-3p	isoform_42703	0	target 5' AUAUUGGCGCGGCUCAAUCA 3' :::::::::::::::::::: query 3' UAUAACCGCGCCGAGUUAGU 5'	0	Query: 1 TGATTGAGCCGCGCCAATAT 20 |||||||||||||||||||| Sbjct: 134 ACTAACTCGGCGCGGTTATA 115
Sap-miR171a-3p	isoform_9371	0	target 5' AUAUUGGCGCGGCUCAAUCA 3' :::::::::::::::::::: query 3' UAUAACCGCGCCGAGUUAGU 5'	0	Query: 1 TGATTGAGCCGCGCCAATAT 20 |||||||||||||||||||| Sbjct: 996 ACTAACTCGGCGCGGTTATA 977
Sap-miR171b	isoform_101781	1	target 5' GAUAUUGGCGCGGCUCAAUCA 3' :::::::::.::::::::::: query 3' CUAUAACCGUGCCGAGUUAGU 5'	0.5	Query: 1 TGATTGAGCCGTGCCAATATC 21 |||||||||||:||||||||| Sbjct: 715 ACTAACTCGGCGCGGTTATAG 695
Sap-miR171b	isoform_103273	1	target 5' GAUAUUGGCGCGGCUCAAUCA 3' :::::::::.::::::::::: query 3' CUAUAACCGUGCCGAGUUAGU 5'	0.5	Query: 1 TGATTGAGCCGTGCCAATATC 21 |||||||||||:||||||||| Sbjct: 1001 ACTAACTCGGCGCGGTTATAG 981
Sap-miR171b	isoform_240455	1	target 5' GAUAUUGGCGCGGCUCAAUCA 3' :::::::::.::::::::::: query 3' CUAUAACCGUGCCGAGUUAGU 5'	0.5	Query: 1 TGATTGAGCCGTGCCAATATC 21 |||||||||||:||||||||| Sbjct: 1647 ACTAACTCGGCGCGGTTATAG 1627
Sap-miR171b	isoform_35714	1	target 5' GAUAUUGGCGCGGCUCAAUCA 3' :::::::::.::::::::::: query 3' CUAUAACCGUGCCGAGUUAGU 5'	0.5	Query: 1 TGATTGAGCCGTGCCAATATC 21 |||||||||||:||||||||| Sbjct: 134 ACTAACTCGGCGCGGTTATAG 114
Sap-miR171b	isoform_40023	1	target 5' GAUAUUGGCGCGGCUCAAUCA 3' :::::::::.::::::::::: query 3' CUAUAACCGUGCCGAGUUAGU 5'	0.5	Query: 1 TGATTGAGCCGTGCCAATATC 21 |||||||||||:||||||||| Sbjct: 134 ACTAACTCGGCGCGGTTATAG 114
Sap-miR171b	isoform_4178	1	target 5' GAUAUUGGCGCGGCUCAAUCA 3' :::::::::.::::::::::: query 3' CUAUAACCGUGCCGAGUUAGU 5'	0.5	Query: 1 TGATTGAGCCGTGCCAATATC 21 |||||||||||:||||||||| Sbjct: 1641 ACTAACTCGGCGCGGTTATAG 1621
Sap-miR171b	isoform_42703	1	target 5' GAUAUUGGCGCGGCUCAAUCA 3' :::::::::.::::::::::: query 3' CUAUAACCGUGCCGAGUUAGU 5'	0.5	Query: 1 TGATTGAGCCGTGCCAATATC 21 |||||||||||:||||||||| Sbjct: 134 ACTAACTCGGCGCGGTTATAG 114
Sap-miR171b	isoform_9371	1	target 5' GAUAUUGGCGCGGCUCAAUCA 3' :::::::::.::::::::::: query 3' CUAUAACCGUGCCGAGUUAGU 5'	0.5	Query: 1 TGATTGAGCCGTGCCAATATC 21 |||||||||||:||||||||| Sbjct: 996 ACTAACTCGGCGCGGTTATAG 976
Sap-miR172a_2	isoform_10215	1	target 5' UGCAGCAUCAUCAGGAUUCCC 3' :::::::::::::.::::::: query 3' ACGUCGUAGUAGUUCUAAGGG 5'	0.5	Query: 1 GGGAATCTTGATGATGCTGCA 21 |||||||:||||||||||||| Sbjct: 1963 CCCTTAGGACTACTACGACGT 1943
Sap-miR172a_2	isoform_10264	1	target 5' UGCAGCAUCAUCAGGAUUCCC 3' :::::::::::::.::::::: query 3' ACGUCGUAGUAGUUCUAAGGG 5'	0.5	Query: 1 GGGAATCTTGATGATGCTGCA 21 |||||||:||||||||||||| Sbjct: 1812 CCCTTAGGACTACTACGACGT 1792
Sap-miR172a_2	isoform_102696	1	target 5' UGCAGCAUCAUCAGGAUUCCC 3' :::::::::::::.::::::: query 3' ACGUCGUAGUAGUUCUAAGGG 5'	0.5	Query: 1 GGGAATCTTGATGATGCTGCA 21 |||||||:||||||||||||| Sbjct: 1375 CCCTTAGGACTACTACGACGT 1355
Sap-miR172a_2	isoform_252950	2	target 5' UGCAGCAUCAUCAGGAUUCUC 3' :::::::::::::.:::::.: query 3' ACGUCGUAGUAGUUCUAAGGG 5'	1	Query: 1 GGGAATCTTGATGATGCTGCA 21 |:|||||:||||||||||||| Sbjct: 1570 CTCTTAGGACTACTACGACGT 1550
Sap-miR172a_2	isoform_254145	1	target 5' UGCAGCAUCAUCAGGAUUCCC 3' :::::::::::::.::::::: query 3' ACGUCGUAGUAGUUCUAAGGG 5'	0.5	Query: 1 GGGAATCTTGATGATGCTGCA 21 |||||||:||||||||||||| Sbjct: 2092 CCCTTAGGACTACTACGACGT 2072
Sap-miR172a_2	isoform_254621	2	target 5' UGCAGCAUCAUCAGGAUUCUC 3' :::::::::::::.:::::.: query 3' ACGUCGUAGUAGUUCUAAGGG 5'	1	Query: 1 GGGAATCTTGATGATGCTGCA 21 |:|||||:||||||||||||| Sbjct: 1469 CTCTTAGGACTACTACGACGT 1449
Sap-miR172a_2	isoform_9798	1	target 5' UGCAGCAUCAUCAGGAUUCCC 3' :::::::::::::.::::::: query 3' ACGUCGUAGUAGUUCUAAGGG 5'	0.5	Query: 1 GGGAATCTTGATGATGCTGCA 21 |||||||:||||||||||||| Sbjct: 1948 CCCTTAGGACTACTACGACGT 1928
Sap-miR172a_2	isoform_99420	1	target 5' UGCAGCAUCAUCAGGAUUCCC 3' :::::::::::::.::::::: query 3' ACGUCGUAGUAGUUCUAAGGG 5'	0.5	Query: 1 GGGAATCTTGATGATGCTGCA 21 |||||||:||||||||||||| Sbjct: 1490 CCCTTAGGACTACTACGACGT 1470
Sap-miR172a_3	isoform_10215	2	target 5' UGCAGCAUCAUCAGGAUUCC 3' :::::::::::::.::::: query 3' ACGUCGUAGUAGUUCUAAGA 5'	1	Query: 1 AGAATCTTGATGATGCTGCA 20 *|||||:||||||||||||| Sbjct: 1962 CCTTAGGACTACTACGACGT 1943
Sap-miR172a_3	isoform_10264	2	target 5' UGCAGCAUCAUCAGGAUUCC 3' :::::::::::::.::::: query 3' ACGUCGUAGUAGUUCUAAGA 5'	1	Query: 1 AGAATCTTGATGATGCTGCA 20 *|||||:||||||||||||| Sbjct: 1811 CCTTAGGACTACTACGACGT 1792
Sap-miR172a_3	isoform_102696	2	target 5' UGCAGCAUCAUCAGGAUUCC 3' :::::::::::::.::::: query 3' ACGUCGUAGUAGUUCUAAGA 5'	1	Query: 1 AGAATCTTGATGATGCTGCA 20 *|||||:||||||||||||| Sbjct: 1374 CCTTAGGACTACTACGACGT 1355
Sap-miR172a_3	isoform_104368	1	target 5' UGCAGCAUCAUCAGGAUUCU 3' :::::::::::::.:::::: query 3' ACGUCGUAGUAGUUCUAAGA 5'	0.5	Query: 1 AGAATCTTGATGATGCTGCA 20 ||||||:||||||||||||| Sbjct: 1531 TCTTAGGACTACTACGACGT 1512
Sap-miR172a_3	isoform_104666	1	target 5' UGCAGCAUCAUCAGGAUUCU 3' :::::::::::::.:::::: query 3' ACGUCGUAGUAGUUCUAAGA 5'	0.5	Query: 1 AGAATCTTGATGATGCTGCA 20 ||||||:||||||||||||| Sbjct: 3848 TCTTAGGACTACTACGACGT 3829
Sap-miR172a_3	isoform_105961	2	target 5' UGCAGCAUCAUCAGGAUUCC 3' :::::::::::::.::::: query 3' ACGUCGUAGUAGUUCUAAGA 5'	1	Query: 1 AGAATCTTGATGATGCTGCA 20 *|||||:||||||||||||| Sbjct: 1785 CCTTAGGACTACTACGACGT 1766
Sap-miR172a_3	isoform_259085	2	target 5' UGCAGCAUCAUCAGGAUUCC 3' :::::::::::::.::::: query 3' ACGUCGUAGUAGUUCUAAGA 5'	1	Query: 1 AGAATCTTGATGATGCTGCA 20 *|||||:||||||||||||| Sbjct: 1539 CCTTAGGACTACTACGACGT 1520
Sap-miR172a_3	isoform_295216	2	target 5' UGCAGCAUCAUCAGGAUUCC 3' :::::::::::::.::::: query 3' ACGUCGUAGUAGUUCUAAGA 5'	1	Query: 1 AGAATCTTGATGATGCTGCA 20 *|||||:||||||||||||| Sbjct: 1756 CCTTAGGACTACTACGACGT 1737
Sap-miR172a_3	isoform_77358	2	target 5' CGCAGCAUCAUCAGGAUUCU 3' ::::::::::::.:::::: query 3' ACGUCGUAGUAGUUCUAAGA 5'	1	Query: 1 AGAATCTTGATGATGCTGCA 20 ||||||:||||||||||||* Sbjct: 507 TCTTAGGACTACTACGACGC 488
Sap-miR172b_1	isoform_10215	1	target 5' UGCAGCAUCAUCAGGAUUCC 3' :::::::::::::.:::::: query 3' ACGUCGUAGUAGUUCUAAGG 5'	0.5	Query: 1 GGAATCTTGATGATGCTGCA 20 ||||||:||||||||||||| Sbjct: 1962 CCTTAGGACTACTACGACGT 1943
Sap-miR172b_1	isoform_102696	1	target 5' UGCAGCAUCAUCAGGAUUCC 3' :::::::::::::.:::::: query 3' ACGUCGUAGUAGUUCUAAGG 5'	0.5	Query: 1 GGAATCTTGATGATGCTGCA 20 ||||||:||||||||||||| Sbjct: 1374 CCTTAGGACTACTACGACGT 1355
Sap-miR172b_1	isoform_104368	1.5	target 5' UGCAGCAUCAUCAGGAUUCU 3' :::::::::::::.:::::. query 3' ACGUCGUAGUAGUUCUAAGG 5'	0.8	Query: 1 GGAATCTTGATGATGCTGCA 20 :|||||:||||||||||||| Sbjct: 1531 TCTTAGGACTACTACGACGT 1512
Sap-miR172b_1	isoform_264309	1	target 5' UGCAGCAUCAUCAGGAUUCC 3' :::::::::::::.:::::: query 3' ACGUCGUAGUAGUUCUAAGG 5'	0.5	Query: 1 GGAATCTTGATGATGCTGCA 20 ||||||:||||||||||||| Sbjct: 1888 CCTTAGGACTACTACGACGT 1869
Sap-miR172b_1	isoform_270287	1.5	target 5' UGCAGCAUCAUCAGGAUUCU 3' :::::::::::::.:::::. query 3' ACGUCGUAGUAGUUCUAAGG 5'	0.8	Query: 1 GGAATCTTGATGATGCTGCA 20 :|||||:||||||||||||| Sbjct: 2066 TCTTAGGACTACTACGACGT 2047
Sap-miR172b_1	isoform_90124	1	target 5' UGCAGCAUCAUCAGGAUUCC 3' :::::::::::::.:::::: query 3' ACGUCGUAGUAGUUCUAAGG 5'	0.5	Query: 1 GGAATCTTGATGATGCTGCA 20 ||||||:||||||||||||| Sbjct: 29 CCTTAGGACTACTACGACGT 10
Sap-miR172b_1	isoform_9742	1	target 5' UGCAGCAUCAUCAGGAUUCC 3' :::::::::::::.:::::: query 3' ACGUCGUAGUAGUUCUAAGG 5'	0.5	Query: 1 GGAATCTTGATGATGCTGCA 20 ||||||:||||||||||||| Sbjct: 1826 CCTTAGGACTACTACGACGT 1807
Sap-miR172b_1	isoform_9798	1	target 5' UGCAGCAUCAUCAGGAUUCC 3' :::::::::::::.:::::: query 3' ACGUCGUAGUAGUUCUAAGG 5'	0.5	Query: 1 GGAATCTTGATGATGCTGCA 20 ||||||:||||||||||||| Sbjct: 1947 CCTTAGGACTACTACGACGT 1928
Sap-miR172b_1	isoform_9924	1	target 5' UGCAGCAUCAUCAGGAUUCC 3' :::::::::::::.:::::: query 3' ACGUCGUAGUAGUUCUAAGG 5'	0.5	Query: 1 GGAATCTTGATGATGCTGCA 20 ||||||:||||||||||||| Sbjct: 1776 CCTTAGGACTACTACGACGT 1757
Sap-miR172b_1	isoform_99420	1	target 5' UGCAGCAUCAUCAGGAUUCC 3' :::::::::::::.:::::: query 3' ACGUCGUAGUAGUUCUAAGG 5'	0.5	Query: 1 GGAATCTTGATGATGCTGCA 20 ||||||:||||||||||||| Sbjct: 1489 CCTTAGGACTACTACGACGT 1470
Sap-miR172b_2	isoform_143177	3.5	target 5' GUGUAGCUUCAUCAAGAGUCG 3' ::::::: ::::::::: ::. query 3' CACAUCGUAGUAGUUCUAAGU 5'	2.2	Query: 1 TGAATCTTGATGATGCTACAC 21 :||*|||||||||*||||||| Sbjct: 1405 GCTGAGAACTACTTCGATGTG 1385
Sap-miR172b_2	isoform_236688	2	target 5' GUGUAGCACCAUCAAGAUUCA 3' :::::::: :::::::::::: query 3' CACAUCGUAGUAGUUCUAAGU 5'	1	Query: 1 TGAATCTTGATGATGCTACAC 21 ||||||||||||*|||||||| Sbjct: 788 ACTTAGAACTACCACGATGTG 768
Sap-miR172b_2	isoform_287923	3.5	target 5' GUGUGGCACCAUCAAGAUUUA 3' ::::.::: ::::::::::.: query 3' CACAUCGUAGUAGUUCUAAGU 5'	2	Query: 1 TGAATCTTGATGATGCTACAC 21 |:||||||||||*|||:|||| Sbjct: 781 ATTTAGAACTACCACGGTGTG 761
Sap-miR172b_2	isoform_290640	2	target 5' AUGGAGCAUCAUCAAGAUUCA 3' :: ::::::::::::::::: query 3' CACAUCGUAGUAGUUCUAAGU 5'	1	Query: 1 TGAATCTTGATGATGCTACA-C 21 |||||||||||||||||*||*| Sbjct: 164 ACTTAGAACTACTACGAGGTAG 143
Sap-miR172b_2	isoform_293548	2	target 5' GUGUAGCACCAUCAAGAUUCA 3' :::::::: :::::::::::: query 3' CACAUCGUAGUAGUUCUAAGU 5'	1	Query: 1 TGAATCTTGATGATGCTACAC 21 ||||||||||||*|||||||| Sbjct: 752 ACTTAGAACTACCACGATGTG 732
Sap-miR172b_2	isoform_78267	2	target 5' GUGUAGCACCAUCAAGAUUCA 3' :::::::: :::::::::::: query 3' CACAUCGUAGUAGUUCUAAGU 5'	1	Query: 1 TGAATCTTGATGATGCTACAC 21 ||||||||||||*|||||||| Sbjct: 216 ACTTAGAACTACCACGATGTG 196
Sap-miR172c-3p	isoform_102696	2	target 5' GCAGCAUCAUCAGGAUUCC 3' ::::::::::::.::::: query 3' CGUCGUAGUAGUUCUAAGA 5'	1	Query: 1 AGAATCTTGATGATGCTGC 19 *|||||:|||||||||||| Sbjct: 1374 CCTTAGGACTACTACGACG 1356
Sap-miR172c-3p	isoform_104368	1	target 5' GCAGCAUCAUCAGGAUUCU 3' ::::::::::::.:::::: query 3' CGUCGUAGUAGUUCUAAGA 5'	0.5	Query: 1 AGAATCTTGATGATGCTGC 19 ||||||:|||||||||||| Sbjct: 1531 TCTTAGGACTACTACGACG 1513
Sap-miR172c-3p	isoform_105961	2	target 5' GCAGCAUCAUCAGGAUUCC 3' ::::::::::::.::::: query 3' CGUCGUAGUAGUUCUAAGA 5'	1	Query: 1 AGAATCTTGATGATGCTGC 19 *|||||:|||||||||||| Sbjct: 1785 CCTTAGGACTACTACGACG 1767
Sap-miR172c-3p	isoform_10616	2	target 5' GCAGCAUCAUCAGGAUUCC 3' ::::::::::::.::::: query 3' CGUCGUAGUAGUUCUAAGA 5'	1	Query: 1 AGAATCTTGATGATGCTGC 19 *|||||:|||||||||||| Sbjct: 1811 CCTTAGGACTACTACGACG 1793
Sap-miR172c-3p	isoform_112121	1	target 5' GCAGCAUCAUCAGGAUUCU 3' ::::::::::::.:::::: query 3' CGUCGUAGUAGUUCUAAGA 5'	0.5	Query: 1 AGAATCTTGATGATGCTGC 19 ||||||:|||||||||||| Sbjct: 732 TCTTAGGACTACTACGACG 714
Sap-miR172c-3p	isoform_264309	2	target 5' GCAGCAUCAUCAGGAUUCC 3' ::::::::::::.::::: query 3' CGUCGUAGUAGUUCUAAGA 5'	1	Query: 1 AGAATCTTGATGATGCTGC 19 *|||||:|||||||||||| Sbjct: 1888 CCTTAGGACTACTACGACG 1870
Sap-miR172c-3p	isoform_270070	2	target 5' GCAGCAUCAUCAGGAUUCC 3' ::::::::::::.::::: query 3' CGUCGUAGUAGUUCUAAGA 5'	1	Query: 1 AGAATCTTGATGATGCTGC 19 *|||||:|||||||||||| Sbjct: 2391 CCTTAGGACTACTACGACG 2373
Sap-miR172c-3p	isoform_270287	1	target 5' GCAGCAUCAUCAGGAUUCU 3' ::::::::::::.:::::: query 3' CGUCGUAGUAGUUCUAAGA 5'	0.5	Query: 1 AGAATCTTGATGATGCTGC 19 ||||||:|||||||||||| Sbjct: 2066 TCTTAGGACTACTACGACG 2048
Sap-miR172c-3p	isoform_99420	2	target 5' GCAGCAUCAUCAGGAUUCC 3' ::::::::::::.::::: query 3' CGUCGUAGUAGUUCUAAGA 5'	1	Query: 1 AGAATCTTGATGATGCTGC 19 *|||||:|||||||||||| Sbjct: 1489 CCTTAGGACTACTACGACG 1471
Sap-miR172d	isoform_104368	2	target 5' CUGCAGCAUCAUCAGGAUUCUCA 3' :::::::::::::.:::::::: query 3' UACGUCGUAGUAGUUCUAAGAGU 5'	1	Query: 1 TGAGAATCTTGATGATGCTGCA-T 23 ||||||||:|||||||||||||*| Sbjct: 1533 ACTCTTAGGACTACTACGACGTCA 1510
Sap-miR172d	isoform_112121	3	target 5' ACGCAGCAUCAUCAGGAUUCUCU 3' : ::::::::::::.::::::: query 3' UACGUCGUAGUAGUUCUAAGAGU 5'	1.5	Query: 1 TGAGAATCTTGATGATGCTGCAT 23 *|||||||:||||||||||||*| Sbjct: 734 TCTCTTAGGACTACTACGACGCA 712
Sap-miR172d	isoform_252950	1	target 5' AUGCAGCAUCAUCAGGAUUCUCA 3' ::::::::::::::.:::::::: query 3' UACGUCGUAGUAGUUCUAAGAGU 5'	0.5	Query: 1 TGAGAATCTTGATGATGCTGCAT 23 ||||||||:|||||||||||||| Sbjct: 1571 ACTCTTAGGACTACTACGACGTA 1549
Sap-miR172d	isoform_254621	2	target 5' CUGCAGCAUCAUCAGGAUUCUCA 3' :::::::::::::.:::::::: query 3' UACGUCGUAGUAGUUCUAAGAGU 5'	1	Query: 1 TGAGAATCTTGATGATGCTGCA-T 23 ||||||||:|||||||||||||*| Sbjct: 1470 ACTCTTAGGACTACTACGACGTCA 1447
Sap-miR172d	isoform_270287	2	target 5' AUGCAGCAUCAUCAGGAUUCUCU 3' ::::::::::::::.::::::: query 3' UACGUCGUAGUAGUUCUAAGAGU 5'	1	Query: 1 TGAGAATCTTGATGATGCTGCAT 23 *|||||||:|||||||||||||| Sbjct: 2068 TCTCTTAGGACTACTACGACGTA 2046
Sap-miR172d	isoform_77358	3	target 5' ACGCAGCAUCAUCAGGAUUCUCU 3' : ::::::::::::.::::::: query 3' UACGUCGUAGUAGUUCUAAGAGU 5'	1.5	Query: 1 TGAGAATCTTGATGATGCTGCAT 23 *|||||||:||||||||||||*| Sbjct: 509 TCTCTTAGGACTACTACGACGCA 487
Sap-miR172d	isoform_87116	1	target 5' AUGCAGCAUCAUCAGGAUUCUCA 3' ::::::::::::::.:::::::: query 3' UACGUCGUAGUAGUUCUAAGAGU 5'	0.5	Query: 1 TGAGAATCTTGATGATGCTGCAT 23 ||||||||:|||||||||||||| Sbjct: 249 ACTCTTAGGACTACTACGACGTA 227
Sap-miR172d	isoform_88306	1	target 5' AUGCAGCAUCAUCAGGAUUCUCA 3' ::::::::::::::.:::::::: query 3' UACGUCGUAGUAGUUCUAAGAGU 5'	0.5	Query: 1 TGAGAATCTTGATGATGCTGCAT 23 ||||||||:|||||||||||||| Sbjct: 250 ACTCTTAGGACTACTACGACGTA 228
Sap-miR172e-3p	isoform_10215	2	target 5' CUGCAGCAUCAUCAGGAUUC 3' :::::::::::::.::::: query 3' UACGUCGUAGUAGUUCUAAG 5'	1	Query: 1 GAATCTTGATGATGCTGCAT 20 |||||:|||||||||||||* Sbjct: 1961 CTTAGGACTACTACGACGTC 1942
Sap-miR172e-3p	isoform_10264	2	target 5' CUGCAGCAUCAUCAGGAUUC 3' :::::::::::::.::::: query 3' UACGUCGUAGUAGUUCUAAG 5'	1	Query: 1 GAATCTTGATGATGCTGCAT 20 |||||:|||||||||||||* Sbjct: 1810 CTTAGGACTACTACGACGTC 1791
Sap-miR172e-3p	isoform_102696	2	target 5' CUGCAGCAUCAUCAGGAUUC 3' :::::::::::::.::::: query 3' UACGUCGUAGUAGUUCUAAG 5'	1	Query: 1 GAATCTTGATGATGCTGCAT 20 |||||:|||||||||||||* Sbjct: 1373 CTTAGGACTACTACGACGTC 1354
Sap-miR172e-3p	isoform_104368	2	target 5' CUGCAGCAUCAUCAGGAUUC 3' :::::::::::::.::::: query 3' UACGUCGUAGUAGUUCUAAG 5'	1	Query: 1 GAATCTTGATGATGCTGCA-T 20 |||||:|||||||||||||*| Sbjct: 1530 CTTAGGACTACTACGACGTCA 1510
Sap-miR172e-3p	isoform_274963	2	target 5' CUGCAGCAUCAUCAGGAUUC 3' :::::::::::::.::::: query 3' UACGUCGUAGUAGUUCUAAG 5'	1	Query: 1 GAATCTTGATGATGCTGCAT 20 |||||:|||||||||||||* Sbjct: 1692 CTTAGGACTACTACGACGTC 1673
Sap-miR172e-3p	isoform_294196	2	target 5' CUGCAGCAUCAUCAGGAUUC 3' :::::::::::::.::::: query 3' UACGUCGUAGUAGUUCUAAG 5'	1	Query: 1 GAATCTTGATGATGCTGCAT 20 |||||:|||||||||||||* Sbjct: 601 CTTAGGACTACTACGACGTC 582
Sap-miR172e-3p	isoform_295216	2	target 5' CUGCAGCAUCAUCAGGAUUC 3' :::::::::::::.::::: query 3' UACGUCGUAGUAGUUCUAAG 5'	1	Query: 1 GAATCTTGATGATGCTGCAT 20 |||||:|||||||||||||* Sbjct: 1755 CTTAGGACTACTACGACGTC 1736
Sap-miR172e-3p	isoform_77358	2	target 5' ACGCAGCAUCAUCAGGAUUC 3' : ::::::::::::.::::: query 3' UACGUCGUAGUAGUUCUAAG 5'	1	Query: 1 GAATCTTGATGATGCTGCAT 20 |||||:||||||||||||*| Sbjct: 506 CTTAGGACTACTACGACGCA 487
Sap-miR172e-3p	isoform_9924	2	target 5' CUGCAGCAUCAUCAGGAUUC 3' :::::::::::::.::::: query 3' UACGUCGUAGUAGUUCUAAG 5'	1	Query: 1 GAATCTTGATGATGCTGCAT 20 |||||:|||||||||||||* Sbjct: 1775 CTTAGGACTACTACGACGTC 1756
Sap-miR172e-3p	isoform_99420	2	target 5' CUGCAGCAUCAUCAGGAUUC 3' :::::::::::::.::::: query 3' UACGUCGUAGUAGUUCUAAG 5'	1	Query: 1 GAATCTTGATGATGCTGCAT 20 |||||:|||||||||||||* Sbjct: 1488 CTTAGGACTACTACGACGTC 1469
Sap-miR172g-3p	isoform_10215	1	target 5' CUGCAGCAUCAUCAGGAUUCC 3' ::::::::::::::.:::::: query 3' GACGUCGUAGUAGUUCUAAGG 5'	0.5	Query: 1 GGAATCTTGATGATGCTGCAG 21 ||||||:|||||||||||||| Sbjct: 1962 CCTTAGGACTACTACGACGTC 1942
Sap-miR172g-3p	isoform_10264	1	target 5' CUGCAGCAUCAUCAGGAUUCC 3' ::::::::::::::.:::::: query 3' GACGUCGUAGUAGUUCUAAGG 5'	0.5	Query: 1 GGAATCTTGATGATGCTGCAG 21 ||||||:|||||||||||||| Sbjct: 1811 CCTTAGGACTACTACGACGTC 1791
Sap-miR172g-3p	isoform_102696	1	target 5' CUGCAGCAUCAUCAGGAUUCC 3' ::::::::::::::.:::::: query 3' GACGUCGUAGUAGUUCUAAGG 5'	0.5	Query: 1 GGAATCTTGATGATGCTGCAG 21 ||||||:|||||||||||||| Sbjct: 1374 CCTTAGGACTACTACGACGTC 1354
Sap-miR172g-3p	isoform_105961	1	target 5' CUGCAGCAUCAUCAGGAUUCC 3' ::::::::::::::.:::::: query 3' GACGUCGUAGUAGUUCUAAGG 5'	0.5	Query: 1 GGAATCTTGATGATGCTGCAG 21 ||||||:|||||||||||||| Sbjct: 1785 CCTTAGGACTACTACGACGTC 1765
Sap-miR172g-3p	isoform_9798	1	target 5' CUGCAGCAUCAUCAGGAUUCC 3' ::::::::::::::.:::::: query 3' GACGUCGUAGUAGUUCUAAGG 5'	0.5	Query: 1 GGAATCTTGATGATGCTGCAG 21 ||||||:|||||||||||||| Sbjct: 1947 CCTTAGGACTACTACGACGTC 1927
Sap-miR172g-3p	isoform_9924	1	target 5' CUGCAGCAUCAUCAGGAUUCC 3' ::::::::::::::.:::::: query 3' GACGUCGUAGUAGUUCUAAGG 5'	0.5	Query: 1 GGAATCTTGATGATGCTGCAG 21 ||||||:|||||||||||||| Sbjct: 1776 CCTTAGGACTACTACGACGTC 1756
Sap-miR172g-3p	isoform_99420	1	target 5' CUGCAGCAUCAUCAGGAUUCC 3' ::::::::::::::.:::::: query 3' GACGUCGUAGUAGUUCUAAGG 5'	0.5	Query: 1 GGAATCTTGATGATGCTGCAG 21 ||||||:|||||||||||||| Sbjct: 1489 CCTTAGGACTACTACGACGTC 1469
Sap-miR172g-3p	isoform_99948	3	target 5' CUGCGGUAUCCUCAAGAUUCC 3' ::::.:.::: :::::::::: query 3' GACGUCGUAGUAGUUCUAAGG 5'	2	Query: 1 GGAATCTTGATGATGCTGCAG 21 ||||||||||*|||:|:|||| Sbjct: 46 CCTTAGAACTCCTATGGCGTC 26
Sap-miR319	isoform_111305	3	target 5' AUGGAGCUCCCUUCACUCCAA 3' : ::::::::::::: ::::: query 3' UCCCUCGAGGGAAGUCAGGUU 5'	1.5	Query: 1 TTGGACTGAAGGGAGCTCCCT 21 |||||*|||||||||||||*| Sbjct: 2743 AACCTCACTTCCCTCGAGGTA 2723
Sap-miR319	isoform_168625	3.5	target 5' GGGGGGGUCCUUUCAGUCCAG 3' .:::.: :::.:::::::::. query 3' UCCCUCGAGGGAAGUCAGGUU 5'	2.5	Query: 1 TTGGACTGAAGGGAGCTCCCT 21 :|||||||||:|||*|:|||: Sbjct: 340 GACCTGACTTTCCTGGGGGGG 320
Sap-miR319	isoform_33078	3	target 5' CCGGAGCUCCCUUCAGUCUAA 3' ::::::::::::::::.:: query 3' UCCCUCGAGGGAAGUCAGGUU 5'	1.5	Query: 1 TTGGACTGAAGGGAGCTCCCT 21 ||:||||||||||||||||** Sbjct: 115 AATCTGACTTCCCTCGAGGCC 95
Sap-miR319	isoform_35271	2	target 5' AGAGAGCUCCCUUCAGUCUAA 3' :: :::::::::::::::.:: query 3' UCCCUCGAGGGAAGUCAGGUU 5'	1	Query: 1 TTGGACTGAAGGGAGCTCCCT 21 ||:|||||||||||||||*|| Sbjct: 95 AATCTGACTTCCCTCGAGAGA 75
Sap-miR319	isoform_38105	2	target 5' AGAGAGCUCCCUUCAGUCUAA 3' :: :::::::::::::::.:: query 3' UCCCUCGAGGGAAGUCAGGUU 5'	1	Query: 1 TTGGACTGAAGGGAGCTCCCT 21 ||:|||||||||||||||*|| Sbjct: 113 AATCTGACTTCCCTCGAGAGA 93
Sap-miR393-5p	isoform_10090	2.5	target 5' GACAAUGCGAUCCCUUUGGAU 3' . :::::::::::::::::: query 3' UAGUUACGCUAGGGAAACCUU 5'	1	Query: 1 TTCCAAAGGGATCGCATTGAT 21 *||||||||||||||||||*| Sbjct: 1767 TAGGTTTCCCTAGCGTAAC-A 1748
Sap-miR393-5p	isoform_103855	2.5	target 5' GACAAUGCGAUCCCUUUGGAU 3' . :::::::::::::::::: query 3' UAGUUACGCUAGGGAAACCUU 5'	1	Query: 1 TTCCAAAGGGATCGCATTGAT 21 *||||||||||||||||||*| Sbjct: 1688 TAGGTTTCCCTAGCGTAAC-A 1669
Sap-miR393-5p	isoform_112289	3.5	target 5' GUCAAUGAGGUCCCUUUGGAU 3' .:::::: :.:::::::::: query 3' UAGUUACGCUAGGGAAACCUU 5'	2.2	Query: 1 TTCCAAAGGGATCGCATTGAT 21 *||||||||||:|*||||||: Sbjct: 1738 TAGGTTTCCCTGGAGTAACTG 1718
Sap-miR393-5p	isoform_116376	3.5	target 5' GUCAAUGAGGUCCCUUUGGAU 3' .:::::: :.:::::::::: query 3' UAGUUACGCUAGGGAAACCUU 5'	2.2	Query: 1 TTCCAAAGGGATCGCATTGAT 21 *||||||||||:|*||||||: Sbjct: 2327 TAGGTTTCCCTGGAGTAACTG 2307
Sap-miR393-5p	isoform_128023	3.5	target 5' GUCAAUGAGGUCCCUUUGGAU 3' .:::::: :.:::::::::: query 3' UAGUUACGCUAGGGAAACCUU 5'	2.2	Query: 1 TTCCAAAGGGATCGCATTGAT 21 *||||||||||:|*||||||: Sbjct: 1648 TAGGTTTCCCTGGAGTAACTG 1628
Sap-miR393-5p	isoform_219592	3.5	target 5' GUCAAUGAGGUCCCUUUGGAU 3' .:::::: :.:::::::::: query 3' UAGUUACGCUAGGGAAACCUU 5'	2.2	Query: 1 TTCCAAAGGGATCGCATTGAT 21 *||||||||||:|*||||||: Sbjct: 1765 TAGGTTTCCCTGGAGTAACTG 1745
Sap-miR393-5p	isoform_246892	3.5	target 5' GUCAAUGAGGUCCCUUUGGAU 3' .:::::: :.:::::::::: query 3' UAGUUACGCUAGGGAAACCUU 5'	2.2	Query: 1 TTCCAAAGGGATCGCATTGAT 21 *||||||||||:|*||||||: Sbjct: 1635 TAGGTTTCCCTGGAGTAACTG 1615
Sap-miR393-5p	isoform_262359	3.5	target 5' GUCAAUGAGGUCCCUUUGGAU 3' .:::::: :.:::::::::: query 3' UAGUUACGCUAGGGAAACCUU 5'	2.2	Query: 1 TTCCAAAGGGATCGCATTGAT 21 *||||||||||:|*||||||: Sbjct: 38 TAGGTTTCCCTGGAGTAACTG 18
Sap-miR393-5p	isoform_9762	2.5	target 5' GACAAUGCGAUCCCUUUGGAU 3' . :::::::::::::::::: query 3' UAGUUACGCUAGGGAAACCUU 5'	1	Query: 1 TTCCAAAGGGATCGCATTGAT 21 *||||||||||||||||||*| Sbjct: 1772 TAGGTTTCCCTAGCGTAAC-A 1753
Sap-miR393-5p	isoform_9881	3.5	target 5' GUCAAUGAGGUCCCUUUGGAU 3' .:::::: :.:::::::::: query 3' UAGUUACGCUAGGGAAACCUU 5'	2.2	Query: 1 TTCCAAAGGGATCGCATTGAT 21 *||||||||||:|*||||||: Sbjct: 1742 TAGGTTTCCCTGGAGTAACTG 1722
Sap-miR393a	isoform_10090	1	target 5' GA-CAAUGCGAUCCCUUUGGA 3' :: :::::::::::::::::: query 3' CUAGUUACGCUAGGGAAACCU 5'	0.5	Query: 1 TCCAAAGGGATCGCATTGATC 21 ||||||||||||||||||*|| Sbjct: 1766 AGGTTTCCCTAGCGTAAC-AG 1747
Sap-miR393a	isoform_103855	1	target 5' GA-CAAUGCGAUCCCUUUGGA 3' :: :::::::::::::::::: query 3' CUAGUUACGCUAGGGAAACCU 5'	0.5	Query: 1 TCCAAAGGGATCGCATTGATC 21 ||||||||||||||||||*|| Sbjct: 1687 AGGTTTCCCTAGCGTAAC-AG 1668
Sap-miR393a	isoform_104632	1	target 5' GA-CAAUGCGAUCCCUUUGGA 3' :: :::::::::::::::::: query 3' CUAGUUACGCUAGGGAAACCU 5'	0.5	Query: 1 TCCAAAGGGATCGCATTGATC 21 ||||||||||||||||||*|| Sbjct: 1426 AGGTTTCCCTAGCGTAAC-AG 1407
Sap-miR393a	isoform_10565	1	target 5' GA-CAAUGCGAUCCCUUUGGA 3' :: :::::::::::::::::: query 3' CUAGUUACGCUAGGGAAACCU 5'	0.5	Query: 1 TCCAAAGGGATCGCATTGATC 21 ||||||||||||||||||*|| Sbjct: 1730 AGGTTTCCCTAGCGTAAC-AG 1711
Sap-miR393a	isoform_10696	1	target 5' GA-CAAUGCGAUCCCUUUGGA 3' :: :::::::::::::::::: query 3' CUAGUUACGCUAGGGAAACCU 5'	0.5	Query: 1 TCCAAAGGGATCGCATTGATC 21 ||||||||||||||||||*|| Sbjct: 1785 AGGTTTCCCTAGCGTAAC-AG 1766
Sap-miR393a	isoform_8654	1	target 5' GA-CAAUGCGAUCCCUUUGGA 3' :: :::::::::::::::::: query 3' CUAGUUACGCUAGGGAAACCU 5'	0.5	Query: 1 TCCAAAGGGATCGCATTGATC 21 ||||||||||||||||||*|| Sbjct: 1771 AGGTTTCCCTAGCGTAAC-AG 1752
Sap-miR393a	isoform_8815	1	target 5' GA-CAAUGCGAUCCCUUUGGA 3' :: :::::::::::::::::: query 3' CUAGUUACGCUAGGGAAACCU 5'	0.5	Query: 1 TCCAAAGGGATCGCATTGATC 21 ||||||||||||||||||*|| Sbjct: 1794 AGGTTTCCCTAGCGTAAC-AG 1775
Sap-miR393a	isoform_9055	1	target 5' GA-CAAUGCGAUCCCUUUGGA 3' :: :::::::::::::::::: query 3' CUAGUUACGCUAGGGAAACCU 5'	0.5	Query: 1 TCCAAAGGGATCGCATTGATC 21 ||||||||||||||||||*|| Sbjct: 1772 AGGTTTCCCTAGCGTAAC-AG 1753
Sap-miR393a	isoform_9762	1	target 5' GA-CAAUGCGAUCCCUUUGGA 3' :: :::::::::::::::::: query 3' CUAGUUACGCUAGGGAAACCU 5'	0.5	Query: 1 TCCAAAGGGATCGCATTGATC 21 ||||||||||||||||||*|| Sbjct: 1771 AGGTTTCCCTAGCGTAAC-AG 1752
Sap-miR393h	isoform_10090	2	target 5' GA-CAAUGCGAUCCCUUUGGAU 3' :: :::::::::::::::::: query 3' CUAGUUACGCUAGGGAAACCUU 5'	1	Query: 1 TTCCAAAGGGATCGCATTGATC 22 *||||||||||||||||||*|| Sbjct: 1767 TAGGTTTCCCTAGCGTAAC-AG 1747
Sap-miR393h	isoform_103855	2	target 5' GA-CAAUGCGAUCCCUUUGGAU 3' :: :::::::::::::::::: query 3' CUAGUUACGCUAGGGAAACCUU 5'	1	Query: 1 TTCCAAAGGGATCGCATTGATC 22 *||||||||||||||||||*|| Sbjct: 1688 TAGGTTTCCCTAGCGTAAC-AG 1668
Sap-miR393h	isoform_104632	2	target 5' GA-CAAUGCGAUCCCUUUGGAU 3' :: :::::::::::::::::: query 3' CUAGUUACGCUAGGGAAACCUU 5'	1	Query: 1 TTCCAAAGGGATCGCATTGATC 22 *||||||||||||||||||*|| Sbjct: 1427 TAGGTTTCCCTAGCGTAAC-AG 1407
Sap-miR393h	isoform_10565	2	target 5' GA-CAAUGCGAUCCCUUUGGAU 3' :: :::::::::::::::::: query 3' CUAGUUACGCUAGGGAAACCUU 5'	1	Query: 1 TTCCAAAGGGATCGCATTGATC 22 *||||||||||||||||||*|| Sbjct: 1731 TAGGTTTCCCTAGCGTAAC-AG 1711
Sap-miR393h	isoform_8479	2	target 5' GA-CAAUGCGAUCCCUUUGGAU 3' :: :::::::::::::::::: query 3' CUAGUUACGCUAGGGAAACCUU 5'	1	Query: 1 TTCCAAAGGGATCGCATTGATC 22 *||||||||||||||||||*|| Sbjct: 1924 TAGGTTTCCCTAGCGTAAC-AG 1904
Sap-miR393h	isoform_8522	2	target 5' GA-CAAUGCGAUCCCUUUGGAU 3' :: :::::::::::::::::: query 3' CUAGUUACGCUAGGGAAACCUU 5'	1	Query: 1 TTCCAAAGGGATCGCATTGATC 22 *||||||||||||||||||*|| Sbjct: 1768 TAGGTTTCCCTAGCGTAAC-AG 1748
Sap-miR393h	isoform_8654	2	target 5' GA-CAAUGCGAUCCCUUUGGAU 3' :: :::::::::::::::::: query 3' CUAGUUACGCUAGGGAAACCUU 5'	1	Query: 1 TTCCAAAGGGATCGCATTGATC 22 *||||||||||||||||||*|| Sbjct: 1772 TAGGTTTCCCTAGCGTAAC-AG 1752
Sap-miR393h	isoform_8815	2	target 5' GA-CAAUGCGAUCCCUUUGGAU 3' :: :::::::::::::::::: query 3' CUAGUUACGCUAGGGAAACCUU 5'	1	Query: 1 TTCCAAAGGGATCGCATTGATC 22 *||||||||||||||||||*|| Sbjct: 1795 TAGGTTTCCCTAGCGTAAC-AG 1775
Sap-miR393h	isoform_9055	2	target 5' GA-CAAUGCGAUCCCUUUGGAU 3' :: :::::::::::::::::: query 3' CUAGUUACGCUAGGGAAACCUU 5'	1	Query: 1 TTCCAAAGGGATCGCATTGATC 22 *||||||||||||||||||*|| Sbjct: 1773 TAGGTTTCCCTAGCGTAAC-AG 1753
Sap-miR393h	isoform_9762	2	target 5' GA-CAAUGCGAUCCCUUUGGAU 3' :: :::::::::::::::::: query 3' CUAGUUACGCUAGGGAAACCUU 5'	1	Query: 1 TTCCAAAGGGATCGCATTGATC 22 *||||||||||||||||||*|| Sbjct: 1772 TAGGTTTCCCTAGCGTAAC-AG 1752
Sap-miR394a_1	isoform_119912	2.5	target 5' GGAGGUUGACAGAAUGCCGG 3' :::::: :::::::::::.. query 3' CCUCCACCUGUCUUACGGUU 5'	1.8	Query: 1 TTGGCATTCTGTCCACCTCC 20 ::|||||||||||*|||||| Sbjct: 1179 GGCCGTAAGACAGTTGGAGG 1160
Sap-miR394a_1	isoform_120060	1	target 5' GGAGGUUGACAGAAUGCCAA 3' :::::: ::::::::::::: query 3' CCUCCACCUGUCUUACGGUU 5'	1	Query: 1 TTGGCATTCTGTCCACCTCC 20 |||||||||||||*|||||| Sbjct: 410 AACCGTAAGACAGTTGGAGG 391
Sap-miR394a_1	isoform_17312	1	target 5' GGAGGUUGACAGAAUGCCAA 3' :::::: ::::::::::::: query 3' CCUCCACCUGUCUUACGGUU 5'	1	Query: 1 TTGGCATTCTGTCCACCTCC 20 |||||||||||||*|||||| Sbjct: 1261 AACCGTAAGACAGTTGGAGG 1242
Sap-miR394a_1	isoform_282339	1	target 5' GGAGGUUGACAGAAUGCCAA 3' :::::: ::::::::::::: query 3' CCUCCACCUGUCUUACGGUU 5'	1	Query: 1 TTGGCATTCTGTCCACCTCC 20 |||||||||||||*|||||| Sbjct: 1134 AACCGTAAGACAGTTGGAGG 1115
Sap-miR394a_1	isoform_53080	1	target 5' GGAGGUUGACAGAAUGCCAA 3' :::::: ::::::::::::: query 3' CCUCCACCUGUCUUACGGUU 5'	1	Query: 1 TTGGCATTCTGTCCACCTCC 20 |||||||||||||*|||||| Sbjct: 632 AACCGTAAGACAGTTGGAGG 613
Sap-miR394a_1	isoform_87822	1	target 5' GGAGGUUGACAGAAUGCCAA 3' :::::: ::::::::::::: query 3' CCUCCACCUGUCUUACGGUU 5'	1	Query: 1 TTGGCATTCTGTCCACCTCC 20 |||||||||||||*|||||| Sbjct: 48 AACCGTAAGACAGTTGGAGG 29
Sap-miR394a_2	isoform_120060	2	target 5' AAGGAGGUUGACAGAAUGCCAA 3' : :::::: ::::::::::::: query 3' UACCUCCACCUGUCUUACGGUU 5'	1.5	Query: 1 TTGGCATTCTGTCCACCTCCAT 22 |||||||||||||*||||||*| Sbjct: 410 AACCGTAAGACAGTTGGAGGAA 389
Sap-miR394a_2	isoform_17312	2	target 5' AAGGAGGUUGACAGAAUGCCAA 3' : :::::: ::::::::::::: query 3' UACCUCCACCUGUCUUACGGUU 5'	1.5	Query: 1 TTGGCATTCTGTCCACCTCCAT 22 |||||||||||||*||||||*| Sbjct: 1261 AACCGTAAGACAGTTGGAGGAA 1240
Sap-miR394a_2	isoform_257598	3.5	target 5' GAGGAGGUUGACAGAAUGCCGA 3' . :::::: :::::::::::.: query 3' UACCUCCACCUGUCUUACGGUU 5'	2	Query: 1 TTGGCATTCTGTCCACCTCCAT 22 |:|||||||||||*||||||*| Sbjct: 3524 AGCCGTAAGACAGTTGGAGG-A 3504
Sap-miR394a_2	isoform_278846	2	target 5' AAGGAGGUUGACAGAAUGCCAA 3' : :::::: ::::::::::::: query 3' UACCUCCACCUGUCUUACGGUU 5'	1.5	Query: 1 TTGGCATTCTGTCCACCTCCAT 22 |||||||||||||*||||||*| Sbjct: 1196 AACCGTAAGACAGTTGGAGGAA 1175
Sap-miR394a_2	isoform_282339	2	target 5' AAGGAGGUUGACAGAAUGCCAA 3' : :::::: ::::::::::::: query 3' UACCUCCACCUGUCUUACGGUU 5'	1.5	Query: 1 TTGGCATTCTGTCCACCTCCAT 22 |||||||||||||*||||||*| Sbjct: 1134 AACCGTAAGACAGTTGGAGGAA 1113
Sap-miR394a_2	isoform_53080	2	target 5' AAGGAGGUUGACAGAAUGCCAA 3' : :::::: ::::::::::::: query 3' UACCUCCACCUGUCUUACGGUU 5'	1.5	Query: 1 TTGGCATTCTGTCCACCTCCAT 22 |||||||||||||*||||||*| Sbjct: 632 AACCGTAAGACAGTTGGAGGAA 611
Sap-miR394a_2	isoform_87822	2	target 5' AAGGAGGUUGACAGAAUGCCAA 3' : :::::: ::::::::::::: query 3' UACCUCCACCUGUCUUACGGUU 5'	1.5	Query: 1 TTGGCATTCTGTCCACCTCCAT 22 |||||||||||||*||||||*| Sbjct: 48 AACCGTAAGACAGTTGGAGGAA 27
Sap-miR396-3p	isoform_252981	3.5	target 5' UUGCACAGCUUUCUUGAUCUU 3' :. :::::::::::::: ::: query 3' AGGGUGUCGAAAGAACUCGAA 5'	1.8	Query: 1 AAGCTCAAGAAAGCTGTGGGA 21 |||*||||||||||||||*:| Sbjct: 1742 TTCTAGTTCTTTCGACACGTT 1722
Sap-miR396-3p	isoform_273801	2.5	target 5' UCCUACAGCUUUCUUGAGCAU 3' :::.::::::::::::::: : query 3' AGGGUGUCGAAAGAACUCGAA 5'	1.2	Query: 1 AAGCTCAAGAAAGCTGTGGGA 21 |*|||||||||||||||:||| Sbjct: 668 TACGAGTTCTTTCGACATCCT 648
Sap-miR396-3p	isoform_275374	2.5	target 5' UUCCACAGCUUUCUUGAACUU 3' :.::::::::::::::: ::: query 3' AGGGUGUCGAAAGAACUCGAA 5'	1.2	Query: 1 AAGCTCAAGAAAGCTGTGGGA 21 |||*|||||||||||||||:| Sbjct: 240 TTCAAGTTCTTTCGACACCTT 220
Sap-miR396-3p	isoform_281646	2.5	target 5' UUCCACAGCUUUCUUGAACUU 3' :.::::::::::::::: ::: query 3' AGGGUGUCGAAAGAACUCGAA 5'	1.2	Query: 1 AAGCTCAAGAAAGCTGTGGGA 21 |||*|||||||||||||||:| Sbjct: 267 TTCAAGTTCTTTCGACACCTT 247
Sap-miR396-3p	isoform_291412	2.5	target 5' UUCCACAGCUUUCUUGAACUU 3' :.::::::::::::::: ::: query 3' AGGGUGUCGAAAGAACUCGAA 5'	1.2	Query: 1 AAGCTCAAGAAAGCTGTGGGA 21 |||*|||||||||||||||:| Sbjct: 239 TTCAAGTTCTTTCGACACCTT 219
Sap-miR396a-3p_2	isoform_17049	3	target 5' CUCUCCGCAGCUUUAUUGAC 3' :: .::.:::::::::::: query 3' GAAGGGUGUCGAAAUAACUU 5'	2	Query: 1 TTCAATAAAGCTGTGGGAAG 20 *||||||||||||:||:*|| Sbjct: 874 CAGTTATTTCGACGCCTCTC 855
Sap-miR396a-3p_2	isoform_172837	3	target 5' CUCUCCGCAGCUUUAUUGAC 3' :: .::.:::::::::::: query 3' GAAGGGUGUCGAAAUAACUU 5'	2	Query: 1 TTCAATAAAGCTGTGGGAAG 20 *||||||||||||:||:*|| Sbjct: 1748 CAGTTATTTCGACGCCTCTC 1729
Sap-miR396a-3p_2	isoform_215342	3.5	target 5' CUUUCCACAGUUUUUUUGAA 3' :::.::::::.::: ::::: query 3' GAAGGGUGUCGAAAUAACUU 5'	2	Query: 1 TTCAATAAAGCTGTGGGAAG 20 |||||*|||:||||||:||| Sbjct: 106 AAGTTTTTTTGACACCTTTC 87
Sap-miR396a-3p_2	isoform_255703	3	target 5' CUCUCCGCAGCUUUAUUGAC 3' :: .::.:::::::::::: query 3' GAAGGGUGUCGAAAUAACUU 5'	2	Query: 1 TTCAATAAAGCTGTGGGAAG 20 *||||||||||||:||:*|| Sbjct: 735 CAGTTATTTCGACGCCTCTC 716
Sap-miR396a-3p_4	isoform_12446	3.5	target 5' CUUUCAAUAGCUUUCUUGAG 3' ::.: :.:::::::::::: query 3' AAAGGGUGUCGAAAGAACUC 5'	2.5	Query: 1 CTCAAGAAAGCTGTGGGAA-A 20 ||||||||||||:|*|:||*| Sbjct: 2087 GAGTTCTTTCGATAACTTTCT 2067
Sap-miR396a-3p_4	isoform_218033	2.5	target 5' UUUCUUGCAGCUUUCUUGAA 3' ::::...:::::::::::: query 3' AAAGGGUGUCGAAAGAACUC 5'	2	Query: 1 CTCAAGAAAGCTGTGGGAAA 20 *||||||||||||:::|||| Sbjct: 1581 AAGTTCTTTCGACGTTCTTT 1562
Sap-miR396a-3p_4	isoform_244168	3.5	target 5' UGUUCCAUAGCUUUCUUGAU 3' : :.:::.::::::::::: query 3' AAAGGGUGUCGAAAGAACUC 5'	2	Query: 1 CTCAAGAAAGCTGTGGGAAA 20 *|||||||||||:|||:|*| Sbjct: 1583 TAGTTCTTTCGATACCTTGT 1564
Sap-miR396a-3p_4	isoform_250280	2	target 5' AUUCCCACAGCUUUCUUGGG 3' :::::::::::::::::.: query 3' AAAGGGUGUCGAAAGAACUC 5'	1	Query: 1 CTCAAGAAAGCTGTGGGAAA 20 |:|||||||||||||||||* Sbjct: 51 GGGTTCTTTCGACACCCTTA 32
Sap-miR396a-3p_4	isoform_275374	2.5	target 5' UCUUCCACAGCUUUCUUGAA 3' : :.::::::::::::::: query 3' AAAGGGUGUCGAAAGAACUC 5'	1.5	Query: 1 CTCAAGAAAGCTGTGGGAAA 20 *|||||||||||||||:|*| Sbjct: 237 AAGTTCTTTCGACACCTTCT 218
Sap-miR396a-3p_4	isoform_27723	2	target 5' AUUCCCACAGCUUUCUUGGG 3' :::::::::::::::::.: query 3' AAAGGGUGUCGAAAGAACUC 5'	1	Query: 1 CTCAAGAAAGCTGTGGGAAA 20 |:|||||||||||||||||* Sbjct: 143 GGGTTCTTTCGACACCCTTA 124
Sap-miR396a-3p_4	isoform_7720	3.5	target 5' CUUUCAAUAGCUUUCUUGAG 3' ::.: :.:::::::::::: query 3' AAAGGGUGUCGAAAGAACUC 5'	2.5	Query: 1 CTCAAGAAAGCTGTGGGAA-A 20 ||||||||||||:|*|:||*| Sbjct: 2376 GAGTTCTTTCGATAACTTTCT 2356
Sap-miR396a-5p	isoform_122661	3.5	target 5' CCGUUUAAGGAAGCUGUGGGA 3' : :::.:::.:::::::::.: query 3' GUCAAGUUCUUUCGACACCUU 5'	2	Query: 1 TTCCACAGCTTTCTTGAACTG 21 |:|||||||||:|||:|||*| Sbjct: 1188 AGGGTGTCGAAGGAATTTGCC 1168
Sap-miR396a-5p	isoform_207117	3.5	target 5' CAGGUGGAGAAGGCUGUGGAA 3' ::: : .::::.::::::::: query 3' GUCAAGUUCUUUCGACACCUU 5'	2.5	Query: 1 TTCCACAGCTTTCTTGAACTG 21 |||||||||:||||:*|*||| Sbjct: 1504 AAGGTGTCGGAAGAGGTGGAC 1484
Sap-miR396a-5p	isoform_276164	3.5	target 5' CAGUAUCAAGAAAGCUGGGGAG 3' :::: :::::::::::: :::. query 3' GUCA-AGUUCUUUCGACACCUU 5'	2.2	Query: 1 TTCCACAGCTTTCTTGA-ACTG 21 :|||*||||||||||||*|||| Sbjct: 1962 GAGGGGTCGAAAGAACTATGAC 1941
Sap-miR396a-5p	isoform_279859	3	target 5' AAGCUCAAGAAAGCUGUGGGA 3' :: :::::::::::::::.: query 3' GUCAAGUUCUUUCGACACCUU 5'	1.5	Query: 1 TTCCACAGCTTTCTTGAACTG 21 |:|||||||||||||||*||* Sbjct: 345 AGGGTGTCGAAAGAACTCGAA 325
Sap-miR396a-5p	isoform_281646	3	target 5' AAGCUCAAGAAAGCUGUGGGA 3' :: :::::::::::::::.: query 3' GUCAAGUUCUUUCGACACCUU 5'	1.5	Query: 1 TTCCACAGCTTTCTTGAACTG 21 |:|||||||||||||||*||* Sbjct: 351 AGGGTGTCGAAAGAACTCGAA 331
Sap-miR396b	isoform_118289	3.5	target 5' UCUUUAAGGAAGCUGUGGAA 3' ::.:::.::::::::::: query 3' UCAAGUUCUUUCGACACCUU 5'	2	Query: 1 TTCCACAGCTTTCTTGAACT 20 |||||||||||:|||:||** Sbjct: 1262 AAGGTGTCGAAGGAATTTCT 1243
Sap-miR396b	isoform_12190	3	target 5' AGUUCAAGGAAGCUGUUGGAA 3' ::::::::.:::::: ::::: query 3' UCAAGUUCUUUCGAC-ACCUU 5'	2	Query: 1 TTCCACAGCTTTCTTGAACT 20 |:|*|||||||:|||||||| Sbjct: 882 AGGTTGTCGAAGGAACTTGA 863
Sap-miR396b	isoform_122661	3.5	target 5' CGUUUAAGGAAGCUGUGGGA 3' :::.:::.:::::::::.: query 3' UCAAGUUCUUUCGACACCUU 5'	2	Query: 1 TTCCACAGCTTTCTTGAACT 20 |:|||||||||:|||:|||* Sbjct: 1188 AGGGTGTCGAAGGAATTTGC 1169
Sap-miR396b	isoform_139002	3.5	target 5' UCUUUAAGGAAGCUGUGGAA 3' ::.:::.::::::::::: query 3' UCAAGUUCUUUCGACACCUU 5'	2	Query: 1 TTCCACAGCTTTCTTGAACT 20 |||||||||||:|||:||** Sbjct: 994 AAGGTGTCGAAGGAATTTCT 975
Sap-miR396b	isoform_224640	3.5	target 5' UCUUUAAGGAAGCUGUGGAA 3' ::.:::.::::::::::: query 3' UCAAGUUCUUUCGACACCUU 5'	2	Query: 1 TTCCACAGCTTTCTTGAACT 20 |||||||||||:|||:||** Sbjct: 466 AAGGTGTCGAAGGAATTTCT 447
Sap-miR396b	isoform_35743	3.5	target 5' CUUUUAAGGAAGCUGUGGAA 3' ::.:::.::::::::::: query 3' UCAAGUUCUUUCGACACCUU 5'	2	Query: 1 TTCCACAGCTTTCTTGAACT 20 |||||||||||:|||:||** Sbjct: 1293 AAGGTGTCGAAGGAATTTTC 1274
Sap-miR396b	isoform_36206	3.5	target 5' UCUUUAAGGAAGCUGUGGAA 3' ::.:::.::::::::::: query 3' UCAAGUUCUUUCGACACCUU 5'	2	Query: 1 TTCCACAGCTTTCTTGAACT 20 |||||||||||:|||:||** Sbjct: 1229 AAGGTGTCGAAGGAATTTCT 1210
Sap-miR396b	isoform_36514	3.5	target 5' UCUUUAAGGAAGCUGUGGAA 3' ::.:::.::::::::::: query 3' UCAAGUUCUUUCGACACCUU 5'	2	Query: 1 TTCCACAGCTTTCTTGAACT 20 |||||||||||:|||:||** Sbjct: 1330 AAGGTGTCGAAGGAATTTCT 1311
Sap-miR396b-3p	isoform_12446	3.5	target 5' CUUUCAAUAGCUUUCUUGAGU 3' ::.: :.::::::::::::. query 3' AAAGGGUGUCGAAAGAACUCG 5'	2.2	Query: 1 GCTCAAGAAAGCTGTGGGAAA 21 :||||||||||||:|*|*||| Sbjct: 2088 TGAGTTCTTTCGATAAC-TTT 2069
Sap-miR396b-3p	isoform_212221	3	target 5' AUUCCCACAGCUUUCUUGGGA 3' :::::::::::::::::.: query 3' AAAGGGUGUCGAAAGAACUCG 5'	1.5	Query: 1 GCTCAAGAAAGCTGTGGGAAA 21 *|:|||||||||||||||||* Sbjct: 110 AGGGTTCTTTCGACACCCTTA 90
Sap-miR396b-3p	isoform_218033	3.5	target 5' UUUCUUGCAGCUUUCUUGAAC 3' ::::...:::::::::::: : query 3' AAAGGGUGUCGAAAGAACUCG 5'	2.5	Query: 1 GCTCAAGAAAGCTGTGGGAAA 21 |*||||||||||||:::|||| Sbjct: 1582 CAAGTTCTTTCGACGTTCTTT 1562
Sap-miR396b-3p	isoform_250280	3	target 5' AUUCCCACAGCUUUCUUGGGA 3' :::::::::::::::::.: query 3' AAAGGGUGUCGAAAGAACUCG 5'	1.5	Query: 1 GCTCAAGAAAGCTGTGGGAAA 21 *|:|||||||||||||||||* Sbjct: 52 AGGGTTCTTTCGACACCCTTA 32
Sap-miR396b-3p	isoform_281646	3.5	target 5' UCUUCCACAGCUUUCUUGAAC 3' : :.::::::::::::::: : query 3' AAAGGGUGUCGAAAGAACUCG 5'	1.8	Query: 1 GCTCAAGAAAGCTGTGGGAAA 21 |*|||||||||||||||:|*| Sbjct: 265 CAAGTTCTTTCGACACCTTCT 245
Sap-miR396b-3p	isoform_34004	3	target 5' AUUCCCACAGCUUUCUUGGGA 3' :::::::::::::::::.: query 3' AAAGGGUGUCGAAAGAACUCG 5'	1.5	Query: 1 GCTCAAGAAAGCTGTGGGAAA 21 *|:|||||||||||||||||* Sbjct: 114 AGGGTTCTTTCGACACCCTTA 94
Sap-miR396b-3p	isoform_7720	3.5	target 5' CUUUCAAUAGCUUUCUUGAGU 3' ::.: :.::::::::::::. query 3' AAAGGGUGUCGAAAGAACUCG 5'	2.2	Query: 1 GCTCAAGAAAGCTGTGGGAAA 21 :||||||||||||:|*|*||| Sbjct: 2377 TGAGTTCTTTCGATAAC-TTT 2358
Sap-miR396h	isoform_103355	3	target 5' CGGUUCAAUAAAGCUGUGGG 3' :.:::::: ::::::::::. query 3' GUCAAGUUCUUUCGACACCU 5'	1.5	Query: 1 TCCACAGCTTTCTTGAACTG 20 :||||||||||*||||||:| Sbjct: 255 GGGTGTCGAAATAACTTGGC 236
Sap-miR396h	isoform_122661	3	target 5' CCGUUUAAGGAAGCUGUGGG 3' : :::.:::.:::::::::. query 3' GUCAAGUUCUUUCGACACCU 5'	1.8	Query: 1 TCCACAGCTTTCTTGAACTG 20 :|||||||||:|||:|||*| Sbjct: 1187 GGGTGTCGAAGGAATTTGCC 1168
Sap-miR396h	isoform_87481	3	target 5' CGGUUCAAUAAAGCUGUGGG 3' :.:::::: ::::::::::. query 3' GUCAAGUUCUUUCGACACCU 5'	1.5	Query: 1 TCCACAGCTTTCTTGAACTG 20 :||||||||||*||||||:| Sbjct: 371 GGGTGTCGAAATAACTTGGC 352
Sap-miR396h	isoform_91565	3	target 5' CGGUUCAAUAAAGCUGUGGG 3' :.:::::: ::::::::::. query 3' GUCAAGUUCUUUCGACACCU 5'	1.5	Query: 1 TCCACAGCTTTCTTGAACTG 20 :||||||||||*||||||:| Sbjct: 370 GGGTGTCGAAATAACTTGGC 351
Sap-miR398b	isoform_130923	3.5	target 5' CAGAGGUGACCUGAGAUCACA 3' ::: ::.::::::::: :::: query 3' GUCCCCGCUGGACUCUUGUGU 5'	2	Query: 1 TGTGTTCTCAGGTCGCCCCTG 21 ||||*|||||||||:||*||| Sbjct: 77 ACACTAGAGTCCAGTGGAGAC 57
Sap-miR4995	isoform_141036	0	target 5' CCCUUAACCAAGCCACUGCCU 3' ::::::::::::::::::::: query 3' GGGAAUUGGUUCGGUGACGGA 5'	0	Query: 1 AGGCAGTGGCTTGGTTAAGGG 21 ||||||||||||||||||||| Sbjct: 272 TCCGTCACCGAACCAATTCCC 252
Sap-miR4995	isoform_158926	0	target 5' CCCUUAACCAAGCCACUGCCU 3' ::::::::::::::::::::: query 3' GGGAAUUGGUUCGGUGACGGA 5'	0	Query: 1 AGGCAGTGGCTTGGTTAAGGG 21 ||||||||||||||||||||| Sbjct: 139 TCCGTCACCGAACCAATTCCC 119
Sap-miR4995	isoform_172261	0	target 5' CCCUUAACCAAGCCACUGCCU 3' ::::::::::::::::::::: query 3' GGGAAUUGGUUCGGUGACGGA 5'	0	Query: 1 AGGCAGTGGCTTGGTTAAGGG 21 ||||||||||||||||||||| Sbjct: 271 TCCGTCACCGAACCAATTCCC 251
Sap-miR4995	isoform_192086	0	target 5' CCCUUAACCAAGCCACUGCCU 3' ::::::::::::::::::::: query 3' GGGAAUUGGUUCGGUGACGGA 5'	0	Query: 1 AGGCAGTGGCTTGGTTAAGGG 21 ||||||||||||||||||||| Sbjct: 272 TCCGTCACCGAACCAATTCCC 252
Sap-miR4995	isoform_197182	2	target 5' CCCUUAACCAAGCCACUGCUA 3' :::::::::::::::::::. query 3' GGGAAUUGGUUCGGUGACGGA 5'	1	Query: 1 AGGCAGTGGCTTGGTTAAGGG 21 *:||||||||||||||||||| Sbjct: 235 ATCGTCACCGAACCAATTCCC 215
Sap-miR4995	isoform_236637	0	target 5' CCCUUAACCAAGCCACUGCCU 3' ::::::::::::::::::::: query 3' GGGAAUUGGUUCGGUGACGGA 5'	0	Query: 1 AGGCAGTGGCTTGGTTAAGGG 21 ||||||||||||||||||||| Sbjct: 628 TCCGTCACCGAACCAATTCCC 608
Sap-miR4995	isoform_242332	0.5	target 5' UCCUUAACCAAGCCACUGCCU 3' .:::::::::::::::::::: query 3' GGGAAUUGGUUCGGUGACGGA 5'	0.2	Query: 1 AGGCAGTGGCTTGGTTAAGGG 21 ||||||||||||||||||||: Sbjct: 272 TCCGTCACCGAACCAATTCCT 252
Sap-miR4995	isoform_244260	0	target 5' CCCUUAACCAAGCCACUGCCU 3' ::::::::::::::::::::: query 3' GGGAAUUGGUUCGGUGACGGA 5'	0	Query: 1 AGGCAGTGGCTTGGTTAAGGG 21 ||||||||||||||||||||| Sbjct: 2292 TCCGTCACCGAACCAATTCCC 2272
Sap-miR4995	isoform_284633	0	target 5' CCCUUAACCAAGCCACUGCCU 3' ::::::::::::::::::::: query 3' GGGAAUUGGUUCGGUGACGGA 5'	0	Query: 1 AGGCAGTGGCTTGGTTAAGGG 21 ||||||||||||||||||||| Sbjct: 1110 TCCGTCACCGAACCAATTCCC 1090
Sap-miR4995	isoform_41640	3	target 5' UCCCUAAUCAAGCCACUGUCU 3' .:: :::.::::::::::.:: query 3' GGGAAUUGGUUCGGUGACGGA 5'	1.5	Query: 1 AGGCAGTGGCTTGGTTAAGGG 21 ||:||||||||||:|||*||| Sbjct: 1375 TCTGTCACCGAACTAAT-CCC 1356
Sap-miR4995	isoform_91416	0	target 5' CCCUUAACCAAGCCACUGCCU 3' ::::::::::::::::::::: query 3' GGGAAUUGGUUCGGUGACGGA 5'	0	Query: 1 AGGCAGTGGCTTGGTTAAGGG 21 ||||||||||||||||||||| Sbjct: 279 TCCGTCACCGAACCAATTCCC 259
Sap-miR530a	isoform_103534	2	target 5' CAAGUGCAGGUGCAAAUGCA 3' : ::::::::::::::::: query 3' UUCCACGUCCACGUUUACGU 5'	0.5	Query: 1 TGCATTTGCACCTGCACCTT 20 |||||||||||||||||*|| Sbjct: 298 ACGTAAACGTGGACGTG-AA 280
Sap-miR530a	isoform_182721	2.5	target 5' AGGGUGCUGGUGCAAAUGCA 3' :.::::: :::::::::::: query 3' UUCCACGUCCACGUUUACGU 5'	1.2	Query: 1 TGCATTTGCACCTGCACCTT 20 ||||||||||||*|||||:| Sbjct: 276 ACGTAAACGTGGTCGTGGGA 257
Sap-miR530a	isoform_227368	2	target 5' CAAGUGCAGGUGCAAAUGCA 3' : ::::::::::::::::: query 3' UUCCACGUCCACGUUUACGU 5'	0.5	Query: 1 TGCATTTGCACCTGCACCTT 20 |||||||||||||||||*|| Sbjct: 366 ACGTAAACGTGGACGTG-AA 348
Sap-miR530a	isoform_229501	2	target 5' CAAGUGCAGGUGCAAAUGCA 3' : ::::::::::::::::: query 3' UUCCACGUCCACGUUUACGU 5'	0.5	Query: 1 TGCATTTGCACCTGCACCTT 20 |||||||||||||||||*|| Sbjct: 303 ACGTAAACGTGGACGTG-AA 285
Sap-miR530a	isoform_250099	2.5	target 5' AGGGUGCUGGUGCAAAUGCA 3' :.::::: :::::::::::: query 3' UUCCACGUCCACGUUUACGU 5'	1.2	Query: 1 TGCATTTGCACCTGCACCTT 20 ||||||||||||*|||||:| Sbjct: 314 ACGTAAACGTGGTCGTGGGA 295
Sap-miR530a	isoform_253434	2	target 5' CAAGUGCAGGUGCAAAUGCA 3' : ::::::::::::::::: query 3' UUCCACGUCCACGUUUACGU 5'	0.5	Query: 1 TGCATTTGCACCTGCACCTT 20 |||||||||||||||||*|| Sbjct: 181 ACGTAAACGTGGACGTG-AA 163
Sap-miR530a	isoform_260527	3.5	target 5' GAGGUGCAGGUGUAGGUGCA 3' .:::::::::::.:..:::: query 3' UUCCACGUCCACGUUUACGU 5'	1.8	Query: 1 TGCATTTGCACCTGCACCTT 20 ||||::|:|||||||||||: Sbjct: 300 ACGTGGATGTGGACGTGGAG 281
Sap-miR530a	isoform_267514	2	target 5' CAAGUGCAGGUGCAAAUGCA 3' : ::::::::::::::::: query 3' UUCCACGUCCACGUUUACGU 5'	0.5	Query: 1 TGCATTTGCACCTGCACCTT 20 |||||||||||||||||*|| Sbjct: 370 ACGTAAACGTGGACGTG-AA 352
Sap-miR535a	isoform_107340	2	target 5' GCGUGCUCUCUAUCGUUGUCA 3' ::::::::::: ::::::::: query 3' CGCACGAGAGAGAGCAACAGU 5'	1	Query: 1 TGACAACGAGAGAGAGCACGC 21 |||||||||*||||||||||| Sbjct: 342 ACTGTTGCTATCTCTCGTGCG 322
Sap-miR535a	isoform_248817	3.5	target 5' GCCUGCUCUCUCUCGCUGUCG 3' :: :::::::::::: ::::. query 3' CGCACGAGAGAGAGCAACAGU 5'	1.8	Query: 1 TGACAACGAGAGAGAGCACGC 21 :||||*||||||||||||*|| Sbjct: 75 GCTGTCGCTCTCTCTCGTCCG 55
Sap-miR535a	isoform_250628	2	target 5' GCGUGCUCUCUAUCGUUGUCA 3' ::::::::::: ::::::::: query 3' CGCACGAGAGAGAGCAACAGU 5'	1	Query: 1 TGACAACGAGAGAGAGCACGC 21 |||||||||*||||||||||| Sbjct: 274 ACTGTTGCTATCTCTCGTGCG 254
Sap-miR535a	isoform_266810	2	target 5' GCGUGCUCUCUAUCGUUGUCA 3' ::::::::::: ::::::::: query 3' CGCACGAGAGAGAGCAACAGU 5'	1	Query: 1 TGACAACGAGAGAGAGCACGC 21 |||||||||*||||||||||| Sbjct: 39 ACTGTTGCTATCTCTCGTGCG 19
Sap-miR535a	isoform_99067	2	target 5' GCGUGCUCUCUAUCGUUGUCA 3' ::::::::::: ::::::::: query 3' CGCACGAGAGAGAGCAACAGU 5'	1	Query: 1 TGACAACGAGAGAGAGCACGC 21 |||||||||*||||||||||| Sbjct: 2045 ACTGTTGCTATCTCTCGTGCG 2025
Sap-miR5368	isoform_10215	3.5	target 5' UGUCUACCUGGGAUUGUUU 3' ::::::::::.::.:::.. query 3' ACAGAUGGACUCUGACAGG 5'	1.8	Query: 1 GGACAGTCTCAGGTAGACA 19 ::|||:||:|||||||||| Sbjct: 1325 TTTGTTAGGGTCCATCTGT 1307
Sap-miR5368	isoform_105961	3.5	target 5' UGUCUACCUGGGAUUGUUU 3' ::::::::::.::.:::.. query 3' ACAGAUGGACUCUGACAGG 5'	1.8	Query: 1 GGACAGTCTCAGGTAGACA 19 ::|||:||:|||||||||| Sbjct: 1148 TTTGTTAGGGTCCATCTGT 1130
Sap-miR5368	isoform_156810	3.5	target 5' UGUCUACCUGGGAUUGUUU 3' ::::::::::.::.:::.. query 3' ACAGAUGGACUCUGACAGG 5'	1.8	Query: 1 GGACAGTCTCAGGTAGACA 19 ::|||:||:|||||||||| Sbjct: 1345 TTTGTTAGGGTCCATCTGT 1327
Sap-miR5368	isoform_213907	3	target 5' UGCUUACCUGAGACUGUUU 3' :: .:::::::::::::.. query 3' ACAGAUGGACUCUGACAGG 5'	2.2	Query: 1 GGACAGTCTCAGGTAGACA 19 ::|||||||||||||:*|| Sbjct: 664 TTTGTCAGAGTCCATTCGT 646
Sap-miR5368	isoform_264309	3.5	target 5' UGUCUACCUGGGAUUGUUU 3' ::::::::::.::.:::.. query 3' ACAGAUGGACUCUGACAGG 5'	1.8	Query: 1 GGACAGTCTCAGGTAGACA 19 ::|||:||:|||||||||| Sbjct: 1251 TTTGTTAGGGTCCATCTGT 1233
Sap-miR5368	isoform_270070	3.5	target 5' UGUCUACCUGGGAUUGUUU 3' ::::::::::.::.:::.. query 3' ACAGAUGGACUCUGACAGG 5'	1.8	Query: 1 GGACAGTCTCAGGTAGACA 19 ::|||:||:|||||||||| Sbjct: 1439 TTTGTTAGGGTCCATCTGT 1421
Sap-miR5368	isoform_274963	3.5	target 5' UGUCUACCUGGGAUUGUUU 3' ::::::::::.::.:::.. query 3' ACAGAUGGACUCUGACAGG 5'	1.8	Query: 1 GGACAGTCTCAGGTAGACA 19 ::|||:||:|||||||||| Sbjct: 958 TTTGTTAGGGTCCATCTGT 940
Sap-miR8051-5p	isoform_142399	3.5	target 5' AGAAUUUUUUUACCAUAUUA 3' ::::.:::.:::::::.:: query 3' ACUUAGAAAGAUGGUAUGAU 5'	2	Query: 1 TAGTATGGTAGAAAGATTC-A 20 ||:|||||||:|||:||||*| Sbjct: 815 ATTATACCATTTTTTTAAGAT 795
Sap-miR8051-5p	isoform_55572	0	target 5' UGAAUCUUUCUACCAUACUA 3' :::::::::::::::::::: query 3' ACUUAGAAAGAUGGUAUGAU 5'	0	Query: 1 TAGTATGGTAGAAAGATTCA 20 |||||||||||||||||||| Sbjct: 434 ATCATACCATCTTTCTAAGT 415
Sap-miR8051-5p	isoform_63105	0	target 5' UGAAUCUUUCUACCAUACUA 3' :::::::::::::::::::: query 3' ACUUAGAAAGAUGGUAUGAU 5'	0	Query: 1 TAGTATGGTAGAAAGATTCA 20 |||||||||||||||||||| Sbjct: 318 ATCATACCATCTTTCTAAGT 299
Sap-miR8051-5p	isoform_72488	0	target 5' UGAAUCUUUCUACCAUACUA 3' :::::::::::::::::::: query 3' ACUUAGAAAGAUGGUAUGAU 5'	0	Query: 1 TAGTATGGTAGAAAGATTCA 20 |||||||||||||||||||| Sbjct: 159 ATCATACCATCTTTCTAAGT 140
Sap-miR8620	isoform_207571	1.5	target 5' ACGGCAGCGGCUGCAGGG 3' ::::::::::::::::. query 3' CGCCGUCGCCGACGUCCU 5'	0.8	Query: 1 TCCTGCAGCCGCTGCCGC 18 :||||||||||||||||* Sbjct: 239 GGGACGTCGGCGACGGCA 222
Sap-miR8620	isoform_225134	1.5	target 5' ACGGCAGCGGCUGCAGGG 3' ::::::::::::::::. query 3' CGCCGUCGCCGACGUCCU 5'	0.8	Query: 1 TCCTGCAGCCGCTGCCGC 18 :||||||||||||||||* Sbjct: 359 GGGACGTCGGCGACGGCA 342
Sap-miR8620	isoform_287284	1.5	target 5' ACGGCAGCGGCUGCAGGG 3' ::::::::::::::::. query 3' CGCCGUCGCCGACGUCCU 5'	0.8	Query: 1 TCCTGCAGCCGCTGCCGC 18 :||||||||||||||||* Sbjct: 344 GGGACGTCGGCGACGGCA 327
Sap-miR8620	isoform_287462	0	target 5' GCGGCAGCGGCUGCAGGA 3' :::::::::::::::::: query 3' CGCCGUCGCCGACGUCCU 5'	0	Query: 1 TCCTGCAGCCGCTGCCGC 18 |||||||||||||||||| Sbjct: 1190 AGGACGTCGGCGACGGCG 1173
Sap-miR8620	isoform_43603	3.5	target 5' GUGGCAGUGGCUGUGGGA 3' :.:::::.:::::..::: query 3' CGCCGUCGCCGACGUCCU 5'	2	Query: 1 TCCTGCAGCCGCTGCCGC 18 |*|::|||||||||||:| Sbjct: 765 AAGGTGTCGGCGACGGTG 748
Sap-miR8620	isoform_47799	1.5	target 5' ACGGCAGCGGCUGCAGGG 3' ::::::::::::::::. query 3' CGCCGUCGCCGACGUCCU 5'	0.8	Query: 1 TCCTGCAGCCGCTGCCGC 18 :||||||||||||||||* Sbjct: 359 GGGACGTCGGCGACGGCA 342
Sap-miR8620	isoform_53698	1.5	target 5' ACGGCAGCGGCUGCAGGG 3' ::::::::::::::::. query 3' CGCCGUCGCCGACGUCCU 5'	0.8	Query: 1 TCCTGCAGCCGCTGCCGC 18 :||||||||||||||||* Sbjct: 359 GGGACGTCGGCGACGGCA 342
Sap-nmiR1	isoform_129873	2	target 5' UUCU-GUAUCUAAUAAGUU 3' :::: :::::::::::::: query 3' AAGACCAUAGAUUAUUCAA 5'	2	Query: 1 AACTTATTAGATACCAGAA 19 |||*||||||||||||||| Sbjct: 290 TTGCATAATCTATGGTCTT 272
Sap-nmiR1	isoform_214491	0	target 5' UUCUGGUAUCUAAUAAGUU 3' ::::::::::::::::::: query 3' AAGACCAUAGAUUAUUCAA 5'	0	Query: 1 AACTTATTAGATACCAGAA 19 |||*||||||||||||||| Sbjct: 574 TTGCATAATCTATGGTCTT 556
Sap-nmiR1	isoform_214589	1	target 5' UUCUGGUAUCUAAUAAGUU 3' ::::::::::::::::::: query 3' AAGACCAUAGAUUAUUCAA 5'	0.5	Query: 1 AACTTATTAGATACCAGAA 19 |||*||||||||||||||| Sbjct: 1249 TTGCATAATCTATGGTCTT 1231
Sap-nmiR1	isoform_243533	1.5	target 5' UUCUGGUAUCUAAUAAGUU 3' ::::::::::::::::::: query 3' AAGACCAUAGAUUAUUCAA 5'	1	Query: 1 AACTTATTAGATACCAGAA 19 |||*||||||||||||||| Sbjct: 879 TTGCATAATCTATGGTCTT 861
Sap-nmiR3	isoform_129584	3	target 5' GGUUGGGAAGACUUUCUCCU 3' ::::: .::::::::::::: query 3' CCAACGUUUCUGAAAGAGGA 5'	2	Query: 1 AGGAGAAAGTCTTTGCAACC 20 |||||||||*|||||||*|| Sbjct: 632 TCCTCTTTCTGAAATCTCGC 613
Sap-nmiR3	isoform_136338	3	target 5' GGUUGCAAAUGCUUUCUCCU 3' ::::::::: .::::::::: query 3' CCAACGUUUCUGAAAGAGGA 5'	2	Query: 1 AGGAGAAAGTCTTTGCAACC 20 |||||||||:*||||||||| Sbjct: 1256 TCCTCTTTCGTAAACGTTGG 1237
Sap-nmiR3	isoform_146950	2.5	target 5' GGUUGGGAAGACUUUCUCCU 3' ::::: .::::::::::::: query 3' CCAACGUUUCUGAAAGAGGA 5'	1.5	Query: 1 AGGAGAAAGTCTTTGCAACC 20 |::|||||||*||||||||* Sbjct: 2607 TTTTCTTTCACAAACGTTGT 2588
Sap-nmiR3	isoform_152511	3.5	target 5' GGUUGGGAAGACUUUCUCCU 3' ::::: .::::::::::::: query 3' CCAACGUUUCUGAAAGAGGA 5'	1.8	Query: 1 AGGAGAAAGTCTTTGCAACC 20 |||||||||||||:*||||| Sbjct: 491 TCCTCTTTCAGAAGGGTTGG 472
Sap-nmiR3	isoform_175269	2.5	target 5' GGUUGUAAAGACUUUGUCCU 3' :::::.::::::::: :::: query 3' CCAACGUUUCUGAAAGAGGA 5'	1.5	Query: 1 AGGAGAAAGTCTTTGCAACC 20 ||||*|||||||||:||||| Sbjct: 1093 TCCTGTTTCAGAAATGTTGG 1074
Sap-nmiR3	isoform_23970	2	target 5' GGUGGCAAAGAUUUUCUUCU 3' ::: :::::::.:::::.:: query 3' CCAACGUUUCUGAAAGAGGA 5'	0.5	Query: 1 AGGAGAAAGTCTTTGCAACC 20 ||:|||||:|||||||*||| Sbjct: 1030 TCTTCTTTTAGAAACGGTGG 1011
Sap-nmiR3	isoform_256106	1.5	target 5' GGUUGGGAAGACUUUCUCCU 3' ::::: .::::::::::::: query 3' CCAACGUUUCUGAAAGAGGA 5'	1.5	Query: 1 AGGAGAAAGTCTTTGCAACC 20 ||||:|||:*|||||*|||| Sbjct: 1747 TCCTTTTTTCGAAACATTGG 1728
Sap-nmiR3	isoform_283899	2	target 5' GUUUGUAAAGACUUUCUUUU 3' : :::.:::::::::::..: query 3' CCAACGUUUCUGAAAGAGGA 5'	1	Query: 1 AGGAGAAAGTCTTTGCAACC 20 |::|||||||||||:|||*| Sbjct: 2295 TTTTCTTTCAGAAATGTTTG 2276
Sap-nmiR6	isoform_134628	2.5	target 5' UCUGCGUUGAUACCACUGCUUAC 3' ::::::::::::::::::::::: query 3' AGACGCAACUAUGGUGACGAAUG 5'	1.5	Query: 1 GTAAGCAGTGGTATCAACGCAGA 23 |*||||||||||*||||||||||| Sbjct: 514 CTTTCGTCACCA-AGTTGCGTCTT 492
Sap-nmiR6	isoform_144618	3	target 5' UCUGCGUUGAUACCACUGCUUAC 3' ::::::::::::::::::::::: query 3' AGACGCAACUAUGGUGACGAAUG 5'	1.5	Query: 1 GTAAGCAGTGGTATCAACGCAGA 23 |*||||||||||*||||||||||| Sbjct: 535 CTTTCGTCACCA-AGTTGCGTCTT 513
Sap-nmiR6	isoform_158609	2	target 5' UCUGCGUUGAUACCACUGCUUAC 3' ::::::::::::::::::::::: query 3' AGACGCAACUAUGGUGACGAAUG 5'	1.5	Query: 1 GTAAGCAGTGGTATCAACGCAGA 23 |*||||||||||*||||||||||| Sbjct: 1048 CTTTCGTCACCA-AGTTGCGTCTT 1026
Sap-nmiR6	isoform_182767	2	target 5' UCUGCGUUGAUACCACUGCUUAC 3' ::::::::::::::::::::::: query 3' AGACGCAACUAUGGUGACGAAUG 5'	1.5	Query: 1 GTAAGCAGTGGTATCAACGCAGA 23 |*||||||||||*||||||||||| Sbjct: 2539 CTTTCGTCACCA-AGTTGCGTCTT 2517
Sap-nmiR6	isoform_199458	1.5	target 5' UCUGCGUUGAUACCACUGCUUAC 3' ::::::::::::::::::::::: query 3' AGACGCAACUAUGGUGACGAAUG 5'	1	Query: 1 GTAAGCAGTGGTATCAACGCAGA 23 |*||||||||||*||||||||||| Sbjct: 361 CTTTCGTCACCA-AGTTGCGTCTT 339
Sap-nmiR6	isoform_200892	2	target 5' UCUGCGUUGAUACCACUGCUUAC 3' ::::::::::::::::::::::: query 3' AGACGCAACUAUGGUGACGAAUG 5'	1.5	Query: 1 GTAAGCAGTGGTATCAACGCAGA 23 |*||||||||||*||||||||||| Sbjct: 440 CTTTCGTCACCA-AGTTGCGTCTT 429
Sap-nmiR6	isoform_214947	0.5	target 5' UCUGCGUUGAUACCACUGCUUAC 3' ::::::::::::::::::::::: query 3' AGACGCAACUAUGGUGACGAAUG 5'	0.5	Query: 1 GTAAGCAGTGGTATCAACGCAGA 23 |*||||||||||*||||||||||| Sbjct: 1238 CTTTCGTCACCA-AGTTGCGTCTT 1216
Sap-nmiR6	isoform_222252	1	target 5' UCUGCGUUGAUACCACUGCUUAC 3' ::::::::::::::::::::::: query 3' AGACGCAACUAUGGUGACGAAUG 5'	0.5	Query: 1 GTAAGCAGTGGTATCAACGCAGA 23 |*||||||||||*||||||||||| Sbjct: 1924 CTTTCGTCACCA-AGTTGCGTCTT 1902
Sap-nmiR6	isoform_254592	0	target 5' UCUGCGUUGAUACCACUGCUUAC 3' ::::::::::::::::::::::: query 3' AGACGCAACUAUGGUGACGAAUG 5'	0	Query: 1 GTAAGCAGTGGTATCAACGCAGA 23 |*||||||||||*||||||||||| Sbjct: 788 CTTTCGTCACCA-AGTTGCGTCTT 766
Sap-nmiR6	isoform_263453	2	target 5' UCUGCGUUGAUACCACUGCUUAC 3' ::::::::::::::::::::::: query 3' AGACGCAACUAUGGUGACGAAUG 5'	1.5	Query: 1 GTAAGCAGTGGTATCAACGCAGA 23 |*||||||||||*||||||||||| Sbjct: 1408 CTTTCGTCACCA-AGTTGCGTCTT 1386
Sap-nmiR6	isoform_293101	3	target 5' UCUGCGUUGAUACCACUGCUUAC 3' ::::::::::::::::::::::: query 3' AGACGCAACUAUGGUGACGAAUG 5'	2	Query: 1 GTAAGCAGTGGTATCAACGCAGA 23 |*||||||||||*||||||||||| Sbjct: 1548 CTTTCGTCACCA-AGTTGCGTCTT 1526
Sap-nmiR8	isoform_108134	1	target 5' GCGAUGAUUGAGCCGUGCCAA 3' : ::::::::::::::::: query 3' CUAGACUAACUCGGCACGGUU 5'	0.5	Query: 1 TTGGCACGGCTCAATCAGATC 21 ||||||||||||||||||||| Sbjct: 1041 AACCGTGCCGAGTTAGTCTAG 1021
Sap-nmiR8	isoform_178520	1.5	target 5' GAGCUGCCUGAGUCGUGCCAA 3' :: ::: ::::.:::::::: query 3' CUAGACUAACUCGGCACGGUU 5'	1	Query: 1 TTGGCACGGCTCAATCAGATC 21 ||||||||||||||||||||| Sbjct: 756 AACCGTGCCGAGTTAGTCTAG 736
Sap-nmiR8	isoform_246385	2	target 5' GAUCUGGCUGAGUCGUGCCAA 3' ::::::. ::::.:::::::: query 3' CUAGACUAACUCGGCACGGUU 5'	1.5	Query: 1 TTGGCACGGCTCAATCAGATC 21 ||||||||||||||||||||| Sbjct: 649 AACCGTGCCGAGTTAGTCTAG 629
Sap-nmiR8	isoform_275116	2	target 5' GCUAUGAUUTAGCCGUGCCAA 3' : : ::::: ::::::::::: query 3' CUAGACUAACUCGGCACGGUU 5'	1	Query: 1 TTGGCACGGCTCAATCAGATC 21 ||||||||||||||||||||| Sbjct: 1217 AACCGTGCCGAGTTAGTCTAG 1197
Sap-nmiR10	isoform_104059	1.5	target 5' GCACAUUUGGUCAUCGCGCUU 3' ::::::::::::::::::::: query 3' CGUGUAAACCAGUAGCGCGAA 5'	1.5	Query: 1 AAGCGCGATGACCAAATGTGC 21 ||||||||||||||||||||| Sbjct: 948 TTCGCGCTACTGGTTTACACG 928
Sap-nmiR10	isoform_107695	3	target 5' GCACAUUUGGUCAUCGCGCUU 3' ::::::::::::::::::::: query 3' CGUGUAAACCAGUAGCGCGAA 5'	1	Query: 1 AAGCGCGATGACCAAATGTGC 21 ||||||||||||||||||||| Sbjct: 710 TTCGCGCTACTGGTTTACACG 690
Sap-nmiR10	isoform_109244	2	target 5' GCACAUUUGGUCAUCGCGCUU 3' ::::::::::::::::::::: query 3' CGUGUAAACCAGUAGCGCGAA 5'	0.5	Query: 1 AAGCGCGATGACCAAATGTGC 21 ||||||||||||||||||||| Sbjct: 213 TTCGCGCTACTGGTTTACACG 193
Sap-nmiR10	isoform_119625	2	target 5' GCACAUUUGGUCAUCGCGCUU 3' ::::::::::::::::::::: query 3' CGUGUAAACCAGUAGCGCGAA 5'	0	Query: 1 AAGCGCGATGACCAAATGTGC 21 ||||||||||||||||||||| Sbjct: 179 TTCGCGCTACTGGTTTACACG 159
Sap-nmiR10	isoform_122100	1	target 5' GCACAUUUGGUCAUCGCGCUU 3' ::::::::::::::::::::: query 3' CGUGUAAACCAGUAGCGCGAA 5'	0	Query: 1 AAGCGCGATGACCAAATGTGC 21 ||||||||||||||||||||| Sbjct: 66 TTCGCGCTACTGGTTTACACG 46
Sap-nmiR10	isoform_124151	0	target 5' GCACAUUUGGUCAUCGCGCUU 3' ::::::::::::::::::::: query 3' CGUGUAAACCAGUAGCGCGAA 5'	0	Query: 1 AAGCGCGATGACCAAATGTGC 21 ||||||||||||||||||||| Sbjct: 42 TTCGCGCTACTGGTTTACACG 22
Sap-nmiR10	isoform_132431	2.5	target 5' GCACAUUUGGUCAUCGCGCUU 3' ::::::::::::::::::::: query 3' CGUGUAAACCAGUAGCGCGAA 5'	2	Query: 1 AAGCGCGATGACCAAATGTGC 21 ||||||||||||||||||||| Sbjct: 66 TTCGCGCTACTGGTTTACACG 46
Sap-nmiR10	isoform_137079	2	target 5' GCACAUUUGGUCAUCGCGCUU 3' ::::::::::::::::::::: query 3' CGUGUAAACCAGUAGCGCGAA 5'	1.5	Query: 1 AAGCGCGATGACCAAATGTGC 21 ||||||||||||||||||||| Sbjct: 933 TTCGCGCTACTGGTTTACACG 913
Sap-nmiR10	isoform_242332	2	target 5' GCACAUUUGGUCAUCGCGCUU 3' ::::::::::::::::::::: query 3' CGUGUAAACCAGUAGCGCGAA 5'	1	Query: 1 AAGCGCGATGACCAAATGTGC 21 *|||*|:||||||||||||*| Sbjct: 1005 GTCGGGTTACTGGTTTACA-G 986
Sap-nmiR10	isoform_3703	2	target 5' GCACAUUUGGUCAUCGCGCUU 3' ::::::::::::::::::::: query 3' CGUGUAAACCAGUAGCGCGAA 5'	1.5	Query: 1 AAGCGCGATGACCAAATGTGC 21 ||||||||||||||||||||| Sbjct: 2644 TTCGCGCTACTGGTTTACACG 2624
Sap-nmiR12	isoform_164683	3	target 5' AGUGACCGAUGGACCUCCAGU 3' ::::::::::::::::::::: query 3' UCACUGGCUACCUGGAGGUCA 5'	1.5	Query: 1 TTGGCACGGCTCAATCAGATC 21 :|||||||:|||||:||*||| Sbjct: 1038 GACCGTGCTGAGTTGGTGTAG 1018
Sap-nmiR12	isoform_185613	2.5	target 5' AGUGGCCGGUGGACCUCCAGC 3' ::::.:::.::::::::::: query 3' UCACUGGCUACCUGGAGGUCA 5'	1.5	Query: 1 TTGGCACGGCTCAATCAGATC 21 ||:||||||||*||*|||||| Sbjct: 1765 AATCGTGCCGACTTCGTCTAG 1745
Sap-nmiR12	isoform_192316	3	target 5' AGUGGCCGGUGGACCUCCAGC 3' ::::.:::.::::::::::: query 3' UCACUGGCUACCUGGAGGUCA 5'	2	Query: 1 TTGGCACGGCTCAATCAGATC 21 ||:||||||||*||||||||| Sbjct: 736 AATCGTGCCGAATTAGTCTAG 716
Sap-nmiR12	isoform_257423	1.5	target 5' AGUGGCCGGUGGACCUCCAGC 3' ::::.:::.::::::::::: query 3' UCACUGGCUACCUGGAGGUCA 5'	1	Query: 1 TTGGCACGGCTCAATCAGATC 21 ||||*||||||*||||||||| Sbjct: 594 AACCCTGCCGATTTAGTCTAG 574
Sap-nmiR16	isoform_193146	2	target 5' GCCUUUACGGAAGGUCAUCUCAGG 3' .:::.::::::::::::::::::: query 3' UGGAGAUGCCUUCCAGUAGAGUCC 5'	1.5	Query: 1 CCTGAGATGACCTTCCGTAGAGGT 24 |||||*||||||||||*||||||| Sbjct: 1725 GGACTATACTGGAAGGAATCTCCA 1702
Sap-nmiR16	isoform_197497	1.5	target 5' AUCUCUACGGAAGGUCAUCUCAGG 3' :.:::::::::::::::::::::: query 3' UGGAGAUGCCUUCCAGUAGAGUCC 5'	1	Query: 1 CCTGAGATGACCTTCCGTAGAGGT 24 |||||*||||||||||*||||||| Sbjct: 1033 GGACTATACTGGAAGGAATCTCCA 1010
Sap-nmiR16	isoform_286726	2.5	target 5' ACCUCUACGGAAGGUCAUCUCAGG 3' :::::::::::::::::::::::: query 3' UGGAGAUGCCUUCCAGUAGAGUCC 5'	2	Query: 1 CCTGAGATGACCTTCCGTAGAGGT 24 |||||*||||||||||*||||||| Sbjct: 1647 GGACTATACTGGAAGGAATCTCCA 1624
Sap-nmiR18	isoform_100552	2	target 5' UCGAAAGUUGAUAGGGCAGA 3' :::::::::::::::::::: query 3' AGCUUUCAACUAUCCCGUCU 5'	1	Query: 1 TCTGCCCTATCAACTTTCGA 20 |*|||||:||||||::|||| Sbjct: 1744 AAACGGGGTAGTTGGGAGCT 1725
Sap-nmiR18	isoform_103191	2	target 5' UCGAAAGUUGAUAGGGCAGA 3' :::::::::::::::::::: query 3' AGCUUUCAACUAUCCCGUCU 5'	1.8	Query: 1 TCTGCCCTATCAACTTTCGA 20 |*|||||:||||||::|||| Sbjct: 1337 AAACGGGGTAGTTGGGAGCT 1318
Sap-nmiR18	isoform_105206	2	target 5' UCGAAAAUUCAUGGGGCAGA 3' :::::: :: ::.::::::: query 3' AGCUUUCAACUAUCCCGUCU 5'	1	Query: 1 TCTGCCCTATCAACTTTCGA 20 |*|||||:||||||::|||| Sbjct: 1647 AAACGGGGTAGTTGGGAGCT 1666
Sap-nmiR18	isoform_192086	2	target 5' UUGGUAGUUGAUAGGGUAGG 3' :.:. :::::::::::.::. query 3' AGCUUUCAACUAUCCCGUCU 5'	1.5	Query: 1 TCTGCCCTATCAACTTTCGA 20 |*|||||:||||||::|||| Sbjct: 245 AAACGGGGTAGTTGGGAGCT 226
Sap-nmiR18	isoform_214491	1	target 5' UCGGAAGUUGAUUGGGCAGC 3' :::.:::::::: :::::: query 3' AGCUUUCAACUAUCCCGUCU 5'	1	Query: 1 TCTGCCCTATCAACTTTCGA 20 |*|||||:||||||::|||| Sbjct: 414 AAACGGGGTAGTTGGGAGCT 395
Sap-nmiR18	isoform_269626	0	target 5' UCGAGGAGUUGAUAGGGAAGA 3' :::: .::::::::::: ::: query 3' AGCU-UUCAACUAUCCCGUCU 5'	0	Query: 1 TCTGCCCTATCAACTTTCGA 20 |*|||||:||||||::|||| Sbjct: 790 AAACGGGGTAGTTGGGAGCT 771
Sap-nmiR19	isoform_158926	2	target 5' AUGGGGAAUGAGUUAUAGAU 3' :: :.::::::::::.:::: query 3' UA-CUCUUACUCAAUGUCUA 5'	1.5	Query: 1 ATCTGTAACTCATTCTCAT 19 *|||*||||:||||||||| Sbjct: 1739 AAGAAATTGGGTAAGAGTA 1721
Sap-nmiR19	isoform_245143	1.5	target 5' CUGAGAAUGGGUUGCAGAG 3' ::::::::.:::.:::: query 3' UACUCUUACUCAAUGUCUA 5'	1	Query: 1 ATCTGTAACTCATTCTCAT 19 ||*|:||*|||*||||||| Sbjct: 652 TAAATATCGAGCAAGAGTA 634
Sap-nmiR22	isoform_102705	3	target 5' AGGACCGAGUGCCACCCAC 3' ::::::::::::::::::: query 3' UCCUGGCUCACGGUGGGUG 5'	1	Query: 1 GTGGGTGGCACTCGGTCCT 19 |||||||||||*|||:||| Sbjct: 1457 CACCCACCGTGTGCCGGGA 1439
Sap-nmiR22	isoform_107111	2.5	target 5' AGGACCGAGUGCCACCCAC 3' ::::::::::::::::::: query 3' UCCUGGCUCACGGUGGGUG 5'	1	Query: 1 GTGGGTGGCACTCGGTCCT 19 ||||||||*|||||||||| Sbjct: 628 CACCCACC-TGACCCAGGA 610
Sap-nmiR22	isoform_154034	3	target 5' AGGACCGAGUGCCACCCAC 3' ::::::::::::::::::: query 3' UCCUGGCUCACGGUGGGUG 5'	2	Query: 1 GTGGGTGGCACTCGGTCCT 19 ||||||||*|||||||||| Sbjct: 1459 CACCCACC-TGACCCAGGA 1441
Sap-nmiR22	isoform_167580	3	target 5' AGGACCGAGUGCCACCCAC 3' ::::::::::::::::::: query 3' UCCUGGCUCACGGUGGGUG 5'	2.5	Query: 1 GTGGGTGGCACTCGGTCCT 19 ||||||||*|||||||||| Sbjct: 1673 CACCCACC-TGACCCAGGA 1655
Sap-nmiR22	isoform_193723	2	target 5' AGGACCGAGUGCCACCCAC 3' ::::::::::::::::::: query 3' UCCUGGCUCACGGUGGGUG 5'	1	Query: 1 GTGGGTGGCACTCGGTCCT 19 |||||||||||*|||:||| Sbjct: 1626 CACCCACCGTGTGCCGGGA 1608
Sap-nmiR22	isoform_266486	2	target 5' AGGACCGAGUGCCACCCAC 3' ::::::::::::::::::: query 3' UCCUGGCUCACGGUGGGUG 5'	1	Query: 1 GTGGGTGGCACTCGGTCCT 19 |||||::||||:|||:||| Sbjct: 983 CACCCGTCGTGGGCCGGGA 965
Sap-nmiR22	isoform_280054	1.5	target 5' AGGACCGAGUGCCACCCAC 3' ::::::::::::::::::: query 3' UCCUGGCUCACGGUGGGUG 5'	1	Query: 1 GTGGGTGGCACTCGGTCCT 19 |||||||||||*|||:||| Sbjct: 996 CACCCACCGTGTGCCGGGA 978
Sap-nmiR23	isoform_115700	1.5	target 5' CAAUUGAAGCUUCAGAGAGCUCU 3' : :::: : :::::::::::::. query 3' GAUAACCU-GAAGUCUCUCGAGG 5'	1	Query: 1 GACACAGGTGGTGCATGGCTGTC 23 :|||||::|||:||||||||||| Sbjct: 1678 TTGTGTTTACCGCGTACCGACAG 1656
Sap-nmiR23	isoform_157932	2	target 5' GACAGCCAUGCACCACCUGUGUC 3' ::::::::::::::::::::::: query 3' CUGUCGGUACGUGGUGGACACAG 5'	1.5	Query: 1 GTGGGTGGCACTCGGTCCT 19 |||||::||||:|||:||| Sbjct: 1872 CACCCGTCGTGGGCCGGGA 1854
Sap-nmiR23	isoform_260216	2	target 5' UUAUGUGGAUUUCAGAGAGUUCU 3' .::: ::::.:::::::::.::. query 3' GAUA-ACCUGAAGUCUCUCGAGG 5'	0.5	Query: 1 GACACAGGTGGTGCATGGCTGTC 23 :|||||::|||:||||||||||| Sbjct: 2036 TTGTGTTTACCGCGTACCGACAG 2014

## Sheet: Data S5
Target gene	Salt-related pathway	1	miRNA	Abbreviation of gene	Annotated description	KEGG	Sap_Fltr_FPKM	Nr	Nt	Swissprot	KOG	Pfam	GO
isoform_100552	ion homeostasis	2	Sap-nmiR18	PIP	aquaporin PIP	egr:104421792/3.4e-146/aquaporin PIP2-1; K09872 aquaporin PIP	0.064	PKI74597.1/1.3e-146/hypothetical protein CRG98_004924 [Punica granatum]	XM_010033894.2/0.0/XM_010033894.2 PREDICTED: Eucalyptus grandis aquaporin PIP2-1 (LOC104421792), mRNA	sp|Q9SV31|PIP25_ARATH/5.8e-136/Probable aquaporin PIP2-5 OS=Arabidopsis thaliana OX=3702 GN=PIP2-5 PE=1 SV=1	At3g54820/1.3e-135/[G] KOG0223 Aquaporin (major intrinsic protein family)	isoform_100552/7.9e-83/Major intrinsic protein	cellular_component:GO:0016021//integral component of membrane;molecular_function:GO:0015267//channel activity;
isoform_10090	protein turnover, morphological adaption, signaling transduction (hormone signaling)	3	Sap-miR393-5p, Sap-miR393a, Sap-miR393h	TIR1	transport inhibitor response 1	zju:107426075/6.8e-281/protein TRANSPORT INHIBITOR RESPONSE 1; K14485 transport inhibitor response 1	0.322	OWM87201.1/1.3e-293/hypothetical protein CDL15_Pgr010233 [Punica granatum] >PKI70520.1 hypothetical protein CRG98_009025 [Punica granatum]	XM_010039868.2/0.0/XM_010039868.2 PREDICTED: Eucalyptus grandis protein TRANSPORT INHIBITOR RESPONSE 1 (LOC104426725), mRNA	sp|Q570C0|TIR1_ARATH/7.8e-275/Protein TRANSPORT INHIBITOR RESPONSE 1 OS=Arabidopsis thaliana OX=3702 GN=TIR1 PE=1 SV=2	At3g62980/1.8e-274/[R] KOG1947 Leucine rich repeat proteins, some proteins contain F-box	isoform_10090/3.2e-08/Leucine Rich repeats (2 copies)	biological_process:GO:0016036//cellular response to phosphate starvation;GO:0010311//lateral root formation;GO:0048443//stamen development;GO:0010152//pollen maturation;cellular_component:GO:0019005//SCF ubiquitin ligase complex;molecular_function:GO:0010011//auxin binding;GO:0000822//inositol hexakisphosphate binding;GO:0038198//auxin receptor activity;
isoform_101209	signaling transduction (hormone signaling)	4	Sap-miR169v	NFYA, HAP2	nuclear transcription factor Y, alpha; transcription factor	egr:104421514/2.1e-31/nuclear transcription factor Y subunit A-1; K08064 nuclear transcription factor Y, alpha	0.064	PKI42496.1/1.4e-47/hypothetical protein CRG98_037085 [Punica granatum]	XM_021736177.1/0.0/XM_021736177.1 PREDICTED: Manihot esculenta nuclear transcription factor Y subunit A-1-like (LOC110599666), transcript variant X4, mRNA	sp|Q9LXV5|NFYA1_ARATH/8.2e-13/Nuclear transcription factor Y subunit A-1 OS=Arabidopsis thaliana OX=3702 GN=NFYA1 PE=2 SV=1	At5g12840/1.9e-12/[K] KOG1561 CCAAT-binding factor, subunit B (HAP2)	isoform_101209/1.3e-12/CCAAT-binding transcription factor (CBF-B/NF-YA) subunit B	cellular_component:GO:0016602//CCAAT-binding factor complex;molecular_function:GO:0003677//DNA binding;GO:0003700//DNA-binding transcription factor activity;
isoform_101781	signaling transduction (hormone signaling)	5	Sap-miR171, Sap-miR171a-3p, Sap-miR171b	DELLA	DELLA protein	cmo:103496794/3.1e-29/DELLA protein GAI-like; K14494 DELLA protein	0.064	OWM66361.1/5.9e-255/hypothetical protein CDL15_Pgr013578 [Punica granatum]	CP023129.1/0.0/CP023129.1 Lupinus angustiflorus cultivar Tanjil chromosome LG-17	sp|O23210|SCL15_ARATH/4.3e-122/Scarecrow-like protein 15 OS=Arabidopsis thaliana OX=3702 GN=SCL15 PE=1 SV=3	At4g36710/4.9e-121/[TK] LSE0487 A Gibberellin response modulator/Predicted transcription factor	isoform_101781/2.2e-86/GRAS domain family	biological_process:GO:0048831//regulation of shoot system development;GO:0030154//cell differentiation;
isoform_10215	signaling transduction (hormone signaling)	6	Sap-miR172a_2, Sap-miR172a_3, Sap-miR172b_1, Sap-miR172e-3p, Sap-miR172g-3p, Sap-miR5368	AP2	AP2-like factor, euAP2 lineage; transcription factor	vvi:100268051/3.6e-157/AP2; transcription factor APETALA2; K09284 AP2-like factor, euAP2 lineage	0.193	PKI33364.1/1.1e-183/hypothetical protein CRG98_046230 [Punica granatum]	XM_021775752.1/0.0/XM_021775752.1 PREDICTED: Manihot esculenta floral homeotic protein APETALA 2 (LOC110628919), transcript variant X1, mRNA	sp|P47927|AP2_ARATH/8.3e-120/Floral homeotic protein APETALA 2 OS=Arabidopsis thaliana OX=3702 GN=AP2 PE=1 SV=1	At4g36920/1.9e-119/[K] LSE0337 A Ovule development protein/AP2 domain transcription factor	isoform_10215/6.2e-20/AP2 domain	cellular_component:GO:0005634//nucleus;molecular_function:GO:0003677//DNA binding;GO:0003700//DNA-binding transcription factor activity;
isoform_102395		7	Sap-miR169r-3p	NA	NA	NA	0.064	NA	NA	NA	NA	NA	NA
isoform_102558		8	Sap-miR169r-3p	NA	NA	NA	0.064	NA	NA	NA	NA	NA	NA
isoform_10264	signaling transduction (hormone signaling)	9	Sap-miR172a_2, Sap-miR172a_3, Sap-miR172e-3p, Sap-miR172g-3p	AP2	AP2-like factor, euAP2 lineage; transcription factor	vvi:100268051/2.2e-143/AP2; transcription factor APETALA2; K09284 AP2-like factor, euAP2 lineage	0.193	OWM82163.1/1.4e-157/hypothetical protein CDL15_Pgr001737 [Punica granatum]	XM_010532951.2/0.0/XM_010532951.2 PREDICTED: Tarenaya hassleriana floral homeotic protein APETALA 2-like (LOC104807594), mRNA	sp|P47927|AP2_ARATH/1.7e-101/Floral homeotic protein APETALA 2 OS=Arabidopsis thaliana OX=3702 GN=AP2 PE=1 SV=1	At4g36920/4.0e-101/[K] LSE0337 A Ovule development protein/AP2 domain transcription factor	isoform_10264/2.6e-17/AP2 domain	cellular_component:GO:0005634//nucleus;molecular_function:GO:0003677//DNA binding;GO:0003700//DNA-binding transcription factor activity;
isoform_102696	signaling transduction (hormone signaling)	10	Sap-miR172a_2, Sap-miR172a_3, Sap-miR172b_1, Sap-miR172c-3p, Sap-miR172e-3p, Sap-miR172g-3p	AP2	AP2-like factor, euAP2 lineage; transcription factor	egu:105045791/6.5e-29/floral homeotic protein APETALA 2-like; K09284 AP2-like factor, euAP2 lineage	0.064	GAY38250.1/1.3e-28/hypothetical protein CUMW_035270 [Citrus unshiu]	XM_010532951.2/0.0/XM_010532951.2 PREDICTED: Tarenaya hassleriana floral homeotic protein APETALA 2-like (LOC104807594), mRNA	sp|P47927|AP2_ARATH/1.8e-29/Floral homeotic protein APETALA 2 OS=Arabidopsis thaliana OX=3702 GN=AP2 PE=1 SV=1	At4g36920/4.2e-29/[K] LSE0337 A Ovule development protein/AP2 domain transcription factor	NA	cellular_component:GO:0005634//nucleus;molecular_function:GO:0003677//DNA binding;GO:0003700//DNA-binding transcription factor activity;
isoform_102705	signaling transduction (MAPK signaling)	11	Sap-nmiR22	WRKY22	WRKY transcription factor 22	han:110926720/1.1e-29/uncharacterized protein LOC110926720; K22020 mucin-19	0.064	PHT25639.1/5.3e-97/hypothetical protein CQW23_34740 [Capsicum baccatum]	AF389239.1/0.0/AF389239.1 Aextoxicon punctatum 26S ribosomal RNA gene, partial sequence	sp|O22176|WRK15_ARATH/7.9e-34/Probable WRKY transcription factor 15 OS=Arabidopsis thaliana OX=3702 GN=WRKY15 PE=2 SV=1	At2g23320/1.8e-33/[KT] LSE0036 A WRKY superfamily transcription factors	NA	NA
isoform_102751	morphological adaption, signaling transduction (hormone signaling)	12	Sap-miR160b	K14486, ARF	auxin response factor; transcription factor	han:110864445/7.7e-16/auxin response factor 9-like; K14486 auxin response factor	0.064	PKI51963.1/1.4e-154/hypothetical protein CRG98_027615 [Punica granatum]	XM_003538112.3/0.0/XM_003538112.3 PREDICTED: Glycine max auxin response factor 18-like (LOC100810558), mRNA	sp|Q9SKN5|ARFJ_ARATH/7.6e-86/Auxin response factor 10 OS=Arabidopsis thaliana OX=3702 GN=ARF10 PE=2 SV=1	At2g28350/1.7e-85/[TK] LSE0284 A Auxin response transcription factor	isoform_102751/1.3e-10/Auxin response factor	biological_process:GO:0006355//regulation of transcription, DNA-templated;GO:0009734//auxin-activated signaling pathway;cellular_component:GO:0005634//nucleus;molecular_function:GO:0003677//DNA binding;
isoform_103191	basic metabolism adaption	13	Sap-nmiR18	FDA3, FDA7, FDA8, desB	acyl-lipid omega-3 desaturase	mesc:110607907/2.8e-23/uncharacterized protein LOC110607907 isoform X1; K20478 golgin subfamily B member 1	0.064	XP_024168160.1/4.3e-52/uncharacterized protein At3g49720-like [Rosa chinensis] >PRQ22159.1 putative S-adenosyl-L-methionine-dependent methyltransferase [Rosa chinensis]	XM_002285464.4/0.0/XM_002285464.4 PREDICTED: Vitis vinifera uncharacterized protein At3g49720 (LOC100243785), mRNA	sp|Q0WPN7|CGR3_ARATH/7.7e-51/Probable pectin methylesterase CGR3 OS=Arabidopsis thaliana OX=3702 GN=CGR3 PE=2 SV=1	NA	isoform_103191/4.8e-38/ABA/WDS induced protein	cellular_component:GO:0016021//integral component of membrane;molecular_function:GO:0008168//methyltransferase activity;
isoform_103273	signaling transduction (hormone signaling)	14	Sap-miR171, Sap-miR171a-3p, Sap-miR171b,	DELLA	DELLA protein	cqi:110729111/5.2e-30/DELLA protein GAI1-like; K14494 DELLA protein	0.064	OWM64907.1/4.1e-233/hypothetical protein CDL15_Pgr028624 [Punica granatum]	XM_018964800.1/0.0/XM_018964800.1 PREDICTED: Juglans regia scarecrow-like protein 27 (LOC108990734), mRNA	sp|O81316|SCL6_ARATH/9.8e-112/Scarecrow-like protein 6 OS=Arabidopsis thaliana OX=3702 GN=SCL6 PE=1 SV=1	At4g00150/2.2e-111/[TK] LSE0487 A Gibberellin response modulator/Predicted transcription factor	isoform_103273/2.4e-88/GRAS domain family	NA
isoform_103355		15	Sap-miR396h	NA	NA	NA	0.064	NA	NA	NA	NA	NA	NA
isoform_103534		16	Sap-miR530a	RP-S15e, RPS15	small subunit ribosomal protein S15e; transcription factor	thj:104815985/2.7e-27/uncharacterized protein LOC104815985 isoform X1; K02958 small subunit ribosomal protein S15e	0.064	PKI61650.1/3.1e-133/hypothetical protein CRG98_017962 [Punica granatum]	XM_019200292.1/0.0/XM_019200292.1 PREDICTED: Nelumbo nucifera uncharacterized LOC104612413 (LOC104612413), transcript variant X4, mRNA	NA	NA	isoform_103534/1.1e-09/Plus-3 domain	biological_process:GO:0006368//transcription elongation from RNA polymerase II promoter;GO:0016570//histone modification;cellular_component:GO:0016593//Cdc73/Paf1 complex;molecular_function:GO:0003677//DNA binding;GO:0008270//zinc ion binding;
isoform_103580	signaling transduction (hormone signaling)	17	Sap-miR171, Sap-miR171a-3p	DELLA	DELLA protein	mdm:103400470/6.4e-31/L3a; DELLA protein GAI-like; K14494 DELLA protein	0.064	OWM64907.1/6.3e-277/hypothetical protein CDL15_Pgr028624 [Punica granatum]	XM_018964800.1/0.0/XM_018964800.1 PREDICTED: Juglans regia scarecrow-like protein 27 (LOC108990734), mRNA	sp|O81316|SCL6_ARATH/1.0e-111/Scarecrow-like protein 6 OS=Arabidopsis thaliana OX=3702 GN=SCL6 PE=1 SV=1	At4g00150/2.4e-111/[TK] LSE0487 A Gibberellin response modulator/Predicted transcription factor	isoform_103580/3.9e-88/GRAS domain family	NA
isoform_103749	signaling transduction (hormone signaling)	18	Sap-miR156a	BRI1	protein brassinosteroid insensitive 1	mdm:103401427/1.2e-15/uncharacterized LOC103401427; K13415 protein brassinosteroid insensitive 1 [EC:2.7.10.1 2.7.11.1]	0.064	OWM89780.1/7.2e-153/hypothetical protein CDL15_Pgr024528 [Punica granatum] >PKI54218.1 hypothetical protein CRG98_025372 [Punica granatum]	XM_012230324.2/0.0/XM_012230324.2 PREDICTED: Jatropha curcas squamosa promoter-binding-like protein 16 (LOC105644836), transcript variant X5, mRNA	sp|Q6YZE8|SPL16_ORYSJ/4.8e-50/Squamosa promoter-binding-like protein 16 OS=Oryza sativa subsp. japonica OX=39947 GN=SPL16 PE=2 SV=1	NA	isoform_103749/1.3e-30/SBP domain	cellular_component:GO:0005634//nucleus;molecular_function:GO:0046872//metal ion binding;GO:0003677//DNA binding;
isoform_103855	protein turnover, morphological adaption, signaling transduction (hormone signaling)	19	Sap-miR393-5p, Sap-miR393a, Sap-miR393h	TIR1	transport inhibitor response 1	jre:108997972/3.6e-90/protein TRANSPORT INHIBITOR RESPONSE 1-like; K14485 transport inhibitor response 1	0.064	XP_018829906.1/2.6e-89/PREDICTED: protein TRANSPORT INHIBITOR RESPONSE 1-like [Juglans regia]	XM_010039868.2/0.0/XM_010039868.2 PREDICTED: Eucalyptus grandis protein TRANSPORT INHIBITOR RESPONSE 1 (LOC104426725), mRNA	sp|Q570C0|TIR1_ARATH/2.5e-65/Protein TRANSPORT INHIBITOR RESPONSE 1 OS=Arabidopsis thaliana OX=3702 GN=TIR1 PE=1 SV=2	At3g62980/5.8e-65/[R] KOG1947 Leucine rich repeat proteins, some proteins contain F-box	NA	biological_process:GO:0031146//SCF-dependent proteasomal ubiquitin-dependent protein catabolic process;GO:0016567//protein ubiquitination;cellular_component:GO:0019005//SCF ubiquitin ligase complex;
isoform_104059		20	Sap-nmiR10	COL7A，COL2A	collagen type VII alpha	han:110893561/2.9e-15/collagen alpha-1(I) chain-like; K16628 collagen, type VII, alpha	0.064	KRH17852.1/1.3e-115/hypothetical protein GLYMA_13G021700, partial [Glycine max]	AF479240.1/0.0/AF479240.1 Lythrum salicaria 26S ribosomal RNA gene, complete sequence	NA	Hs22053937/4.1e-10/[R] KOG1721 FOG: Zn-finger	NA	NA
isoform_104368	signaling transduction (hormone signaling)	21	Sap-miR172a_3, Sap-miR172b_1, Sap-miR172c-3p, Sap-miR172d, Sap-miR172e-3p	AP2	AP2-like factor, euAP2 lineage; transcription factor	jre:108981197/8.9e-116/ethylene-responsive transcription factor RAP2-7-like; K09284 AP2-like factor, euAP2 lineage	0.064	OWM82371.1/1.8e-165/hypothetical protein CDL15_Pgr001945 [Punica granatum]	KX868942.1/0.0/KX868942.1 Vernicia fordii clone comp192732_c0 AP2/ERF domain-containing transcription factor mRNA, complete cds	sp|Q8H443|AP23_ORYSJ/2.3e-93/APETALA2-like protein 3 OS=Oryza sativa subsp. japonica OX=39947 GN=AP2-3 PE=1 SV=1	At2g28550/7.5e-92/[K] LSE0337 A Ovule development protein/AP2 domain transcription factor	isoform_104368/2.5e-19/AP2 domain	cellular_component:GO:0005634//nucleus;molecular_function:GO:0032440//2-alkenal reductase [NAD(P)] activity;GO:0003677//DNA binding;GO:0003700//DNA-binding transcription factor activity;
isoform_104632	protein turnover, morphological adaption, signaling transduction (hormone signaling)	22	Sap-miR393a, Sap-miR393h	TIR1	transport inhibitor response 1	egr:104426725/5.3e-188/protein TRANSPORT INHIBITOR RESPONSE 1; K14485 transport inhibitor response 1	0.064	OWM70714.1/1.6e-270/hypothetical protein CDL15_Pgr014387 [Punica granatum] >PKI32865.1 hypothetical protein CRG98_046750 [Punica granatum]	MF002116.1/0.0/MF002116.1 Castanea mollissima TIR1 mRNA, partial cds	sp|Q9LW29|AFB2_ARATH/4.0e-226/Protein AUXIN SIGNALING F-BOX 2 OS=Arabidopsis thaliana OX=3702 GN=AFB2 PE=1 SV=1	At3g26810/9.2e-226/[R] KOG1947 Leucine rich repeat proteins, some proteins contain F-box	isoform_104632/1.6e-05/Leucine Rich repeats (2 copies)	NA
isoform_104666	signaling transduction (hormone signaling)	23	Sap-miR172a_3	AP2	AP2-like factor, euAP2 lineage; transcription factor	egr:104432834/1.2e-35/AP2-like ethylene-responsive transcription factor TOE3 isoform X1; K09284 AP2-like factor, euAP2 lineage	0.064	OWM67949.1/3.8e-62/hypothetical protein CDL15_Pgr017517 [Punica granatum] >PKI61109.1 hypothetical protein CRG98_018501 [Punica granatum]	AM437918.1/0.0/AM437918.1 Vitis vinifera contig VV78X091249.7, whole genome shotgun sequence	sp|Q9SK03|RAP27_ARATH/3.6e-30/Ethylene-responsive transcription factor RAP2-7 OS=Arabidopsis thaliana OX=3702 GN=RAP2-7 PE=2 SV=2	At2g28550/8.3e-30/[K] LSE0337 A Ovule development protein/AP2 domain transcription factor	isoform_104666/0.044/AP2 domain	cellular_component:GO:0005634//nucleus;molecular_function:GO:0003677//DNA binding;GO:0003700//DNA-binding transcription factor activity;
isoform_104696	signaling transduction (hormone signaling)	24	Sap-miR156a	BRI1	protein brassinosteroid insensitive 1	mdm:103401427/2.7e-17/uncharacterized LOC103401427; K13415 protein brassinosteroid insensitive 1 [EC:2.7.10.1 2.7.11.1]	0.064	OWM90601.1/4.0e-166/hypothetical protein CDL15_Pgr014904 [Punica granatum] >PKI43351.1 hypothetical protein CRG98_036247 [Punica granatum]	KC110080.1/0.0/KC110080.1 Betula luminifera SBP-box transcription factor (SPL1) mRNA, complete cds	sp|Q6YZE8|SPL16_ORYSJ/2.0e-58/Squamosa promoter-binding-like protein 16 OS=Oryza sativa subsp. japonica OX=39947 GN=SPL16 PE=2 SV=1	NA	isoform_104696/3.9e-30/SBP domain	cellular_component:GO:0005634//nucleus;molecular_function:GO:0046872//metal ion binding;GO:0003677//DNA binding;
isoform_105018	morphological adaption, signaling transduction (hormone signaling)	25	Sap-miR160b	K14486, ARF	auxin response factor; transcription factor	ccaj:109813339/2.0e-27/auxin response factor 5; K14486 auxin response factor	0.064	OWM68902.1/6.1e-78/hypothetical protein CDL15_Pgr025089 [Punica granatum]	XM_018826660.1/0.0/XM_018826660.1 PREDICTED: Musa acuminata subsp. malaccensis auxin response factor 18-like (LOC103983875), transcript variant X7, mRNA	sp|Q653H7|ARFR_ORYSJ/1.1e-60/Auxin response factor 18 OS=Oryza sativa subsp. japonica OX=39947 GN=ARF18 PE=2 SV=1	At4g30080/3.3e-60/[TK] LSE0284 A Auxin response transcription factor	isoform_105018/9.5e-21/Auxin response factor	biological_process:GO:0006355//regulation of transcription, DNA-templated;GO:0009734//auxin-activated signaling pathway;cellular_component:GO:0005634//nucleus;molecular_function:GO:0003677//DNA binding;
isoform_105101		26	Sap-miR164b	UXS1, uxs	UDP-glucuronate decarboxylase	hbr:110648423/4.6e-44/UDP-glucuronic acid decarboxylase 6 isoform X1; K08678 UDP-glucuronate decarboxylase [EC:4.1.1.35]	0.064	XP_023884197.1/2.0e-43/UDP-glucuronic acid decarboxylase 6-like [Quercus suber] >XP_023884198.1 UDP-glucuronic acid decarboxylase 6-like [Quercus suber] >XP_023884199.1 UDP-glucuronic acid decarboxylase 6-like [Quercus suber]	EF146443.1/0.0/EF146443.1 Populus trichocarpa clone WS0118_D14 unknown mRNA	sp|Q9SN95|UXS5_ARATH/5.5e-43/UDP-glucuronic acid decarboxylase 5 OS=Arabidopsis thaliana OX=3702 GN=UXS5 PE=2 SV=1	At3g46440/1.2e-42/[GM] KOG1429 dTDP-glucose 4-6-dehydratase/UDP-glucuronic acid decarboxylase	NA	NA
isoform_105206	ion homeostasis	27	Sap-nmiR18	kup	KUP system potassium uptake protein	lja:Lj0g3v0343979.1/2.3e-248/Lj0g3v0343979.1; -; K03549 KUP system potassium uptake protein	0.064	ONH90546.1/0.0e+00/hypothetical protein PRUPE_8G060500 [Prunus persica]	XM_004292435.2/0.0/XM_004292435.2 PREDICTED: Fragaria vesca subsp. vesca potassium transporter 7 (LOC101298488), transcript variant X1, mRNA	sp|Q69RI8|HAK14_ORYSJ/4.5e-266/Probable potassium transporter 14 OS=Oryza sativa subsp. japonica OX=39947 GN=HAK14 PE=2 SV=1	At4g33530/0.0e+00/[P] LSE0144 A Potassium transporter	isoform_105206/3.5e-86/K+ potassium transporter	cellular_component:GO:0016021//integral component of membrane;molecular_function:GO:0015079//potassium ion transmembrane transporter activity;
isoform_10565	protein turnover, morphological adaption, signaling transduction (hormone signaling)	28	Sap-miR393a, Sap-miR393h	TIR1	transport inhibitor response 1	zju:107426075/2.4e-275/protein TRANSPORT INHIBITOR RESPONSE 1; K14485 transport inhibitor response 1	0.193	OWM87201.1/1.2e-286/hypothetical protein CDL15_Pgr010233 [Punica granatum] >PKI70520.1 hypothetical protein CRG98_009025 [Punica granatum]	KJ787017.1/0.0/KJ787017.1 Morus alba var. multicaulis transport inhibitor response 1 (TIR1) mRNA, complete cds	sp|Q570C0|TIR1_ARATH/1.8e-268/Protein TRANSPORT INHIBITOR RESPONSE 1 OS=Arabidopsis thaliana OX=3702 GN=TIR1 PE=1 SV=2	At3g62980/4.1e-268/[R] KOG1947 Leucine rich repeat proteins, some proteins contain F-box	isoform_10565/3e-07/Leucine Rich repeats (2 copies)	NA
isoform_105837		29	Sap-miR169r-3p	NA	NA	NA	0.064	NA	NA	NA	NA	NA	NA
isoform_105961	signaling transduction (hormone signaling)	30	Sap-miR172a_3, Sap-miR172c-3p, Sap-miR172g-3p, Sap-miR5368	AP2	AP2-like factor, euAP2 lineage; transcription factor	vvi:100268051/3.8e-157/AP2; transcription factor APETALA2; K09284 AP2-like factor, euAP2 lineage	0.064	PKI33364.1/1.2e-183/hypothetical protein CRG98_046230 [Punica granatum]	XM_021775752.1/0.0/XM_021775752.1 PREDICTED: Manihot esculenta floral homeotic protein APETALA 2 (LOC110628919), transcript variant X1, mRNA	sp|P47927|AP2_ARATH/8.9e-120/Floral homeotic protein APETALA 2 OS=Arabidopsis thaliana OX=3702 GN=AP2 PE=1 SV=1	At4g36920/2.0e-119/[K] LSE0337 A Ovule development protein/AP2 domain transcription factor	isoform_105961/6.2e-20/AP2 domain	cellular_component:GO:0005634//nucleus;molecular_function:GO:0003677//DNA binding;GO:0003700//DNA-binding transcription factor activity;
isoform_10616	signaling transduction (hormone signaling)	31	Sap-miR172c-3p	AP2	AP2-like factor, euAP2 lineage; transcription factor	vvi:100268051/2.2e-143/AP2; transcription factor APETALA2; K09284 AP2-like factor, euAP2 lineage	0.322	OWM82163.1/1.4e-157/hypothetical protein CDL15_Pgr001737 [Punica granatum]	XM_010532951.2/0.0/XM_010532951.2 PREDICTED: Tarenaya hassleriana floral homeotic protein APETALA 2-like (LOC104807594), mRNA	sp|P47927|AP2_ARATH/1.7e-101/Floral homeotic protein APETALA 2 OS=Arabidopsis thaliana OX=3702 GN=AP2 PE=1 SV=1	At4g36920/3.9e-101/[K] LSE0337 A Ovule development protein/AP2 domain transcription factor	isoform_10616/2.6e-17/AP2 domain	cellular_component:GO:0005634//nucleus;molecular_function:GO:0003677//DNA binding;GO:0003700//DNA-binding transcription factor activity;
isoform_10696	protein turnover, morphological adaption, signaling transduction (hormone signaling)	32	Sap-miR393a	TIR1	transport inhibitor response 1	zju:107426075/6.8e-278/protein TRANSPORT INHIBITOR RESPONSE 1; K14485 transport inhibitor response 1	0.515	OWM87201.1/1.1e-289/hypothetical protein CDL15_Pgr010233 [Punica granatum] >PKI70520.1 hypothetical protein CRG98_009025 [Punica granatum]	KJ787017.1/0.0/KJ787017.1 Morus alba var. multicaulis transport inhibitor response 1 (TIR1) mRNA, complete cds	sp|Q570C0|TIR1_ARATH/1.3e-271/Protein TRANSPORT INHIBITOR RESPONSE 1 OS=Arabidopsis thaliana OX=3702 GN=TIR1 PE=1 SV=2	At3g62980/3.0e-271/[R] KOG1947 Leucine rich repeat proteins, some proteins contain F-box	isoform_10696/7e-08/F-box-like	biological_process:GO:0031146//SCF-dependent proteasomal ubiquitin-dependent protein catabolic process;GO:0016567//protein ubiquitination;cellular_component:GO:0019005//SCF ubiquitin ligase complex;
isoform_107111	basic metabolism adaption	33	Sap-nmiR22	GAPA	glyceraldehyde-3-phosphate dehydrogenase (NADP+) (phosphorylating)	dzi:111311440/9.5e-81/glyceraldehyde-3-phosphate dehydrogenase B, chloroplastic; K05298 glyceraldehyde-3-phosphate dehydrogenase (NADP+) (phosphorylating) [EC:1.2.1.13]	0.064	PHT25639.1/5.0e-94/hypothetical protein CQW23_34740 [Capsicum baccatum]	AF389242.1/0.0/AF389242.1 Berberidopsis corallina 26S ribosomal RNA gene, partial sequence	sp|P12859|G3PB_PEA/7.3e-79/Glyceraldehyde-3-phosphate dehydrogenase B, chloroplastic OS=Pisum sativum OX=3888 GN=GAPB PE=1 SV=2	At1g42970/1.7e-78/[G] KOG0657 Glyceraldehyde 3-phosphate dehydrogenase	isoform_107111/0.12/Domain of unknown function (DUF4283)	NA
isoform_107340		34	Sap-miR535a	NA	uncharacterized LOC18612609 (LOC18612609), transcript variant X3, ncRNA	NA	0.064	NA	XR_001927389.1/0.0/XR_001927389.1 PREDICTED: Theobroma cacao uncharacterized LOC18612609 (LOC18612609), transcript variant X3, ncRNA	NA	NA	NA	NA
isoform_107695	ion homeostasis	35	Sap-nmiR10	ABCB1, CD243	ATP-binding cassette, subfamily B (MDR/TAP), member 1	cpep:111781709/1.8e-123/uncharacterized protein LOC111781709; K05658 ATP-binding cassette, subfamily B (MDR/TAP), member 1 [EC:7.6.2.2]	0.064	OWM73023.1/3.1e-159/hypothetical protein CDL15_Pgr001137 [Punica granatum]	AF479148.1/0.0/AF479148.1 Clarkia xantiana 26S ribosomal RNA gene, complete sequence	sp|Q39224|SRG1_ARATH/1.4e-108/Protein SRG1 OS=Arabidopsis thaliana OX=3702 GN=SRG1 PE=2 SV=1	At1g17020/3.1e-108/[QR] KOG0143 Iron/ascorbate family oxidoreductases	isoform_107695/6.5e-44/Nse1 non-SMC component of SMC5-6 complex	biological_process:GO:0006281//DNA repair;cellular_component:GO:0030915//Smc5-Smc6 complex;molecular_function:GO:0046872//metal ion binding;GO:0051213//dioxygenase activity;GO:0016491//oxidoreductase activity;
isoform_108134	basic metabolism adaption	36	Sap-nmiR8	E1.11.1.7	peroxidase	mdm:103408778/4.4e-61/peroxidase 42-like; K00430 peroxidase [EC:1.11.1.7]	0.064	XP_009360637.1/3.3e-60/PREDICTED: peroxidase 42-like [Pyrus x bretschneideri]	XM_010540636.2/0.0/XM_010540636.2 PREDICTED: Tarenaya hassleriana peroxidase 42 (LOC104813112), mRNA	sp|Q9SB81|PER42_ARATH/9.6e-46/Peroxidase 42 OS=Arabidopsis thaliana OX=3702 GN=PER42 PE=1 SV=2	At4g21960/2.2e-45/[R] TWOG0189 Peroxidase	isoform_108134/8.2e-15/Peroxidase	biological_process:GO:0006979//response to oxidative stress;GO:0042744//hydrogen peroxide catabolic process;cellular_component:GO:0005576//extracellular region;molecular_function:GO:0046872//metal ion binding;GO:0020037//heme binding;GO:0004601//peroxidase activity;
isoform_108619		37	Sap-miR169b-5p, Sap-miR169h	E1.10.3.3	L-ascorbate oxidase	egr:104423768/8.6e-82/L-ascorbate oxidase homolog; K00423 L-ascorbate oxidase [EC:1.10.3.3]	0.064	OWM76317.1/1.2e-87/hypothetical protein CDL15_Pgr009963 [Punica granatum]	XM_007208225.2/0.0/XM_007208225.2 PREDICTED: Prunus persica L-ascorbate oxidase homolog (LOC18772581), mRNA	sp|Q00624|ASOL_BRANA/3.0e-72/L-ascorbate oxidase homolog OS=Brassica napus OX=3708 GN=Bp10 PE=2 SV=1	At1g55570/1.0e-75/[Q] KOG1263 Multicopper oxidases	NA	molecular_function:GO:0005507//copper ion binding;GO:0016491//oxidoreductase activity;
isoform_109244		38	Sap-nmiR10	UBE4B, UFD2	ubiquitin conjugation factor E4 B	egr:104419398/7.0e-221/probable ubiquitin conjugation factor E4; K10597 ubiquitin conjugation factor E4 B [EC:2.3.2.27]	0.064	OWM64547.1/6.0e-237/hypothetical protein CDL15_Pgr020514 [Punica granatum]	XM_021778006.1/0.0/XM_021778006.1 PREDICTED: Manihot esculenta probable ubiquitin conjugation factor E4 (LOC110630485), mRNA	sp|Q9LF41|UBE4_ARATH/1.0e-209/Probable ubiquitin conjugation factor E4 OS=Arabidopsis thaliana OX=3702 GN=PUB1 PE=2 SV=1	At5g15400/2.3e-209/[O] KOG2042 Ubiquitin fusion degradation protein-2	isoform_109244/8e-69/Ubiquitin elongating factor core	biological_process:GO:0006511//ubiquitin-dependent protein catabolic process;cellular_component:GO:0000151//ubiquitin ligase complex;molecular_function:GO:0034450//ubiquitin-ubiquitin ligase activity;
isoform_109911	signaling transduction (hormone signaling)	39	Sap-miR169a-5p, Sap-miR169b-5p, Sap-miR169d-5p, Sap-miR169e, Sap-miR169h, Sap-miR169v	NFYA, HAP2	nuclear transcription factor Y, alpha; transcription factor	zju:107412610/3.3e-38/nuclear transcription factor Y subunit A-1-like; K08064 nuclear transcription factor Y, alpha	0.064	PKI42496.1/6.0e-52/hypothetical protein CRG98_037085 [Punica granatum]	XM_021736177.1/0.0/XM_021736177.1 PREDICTED: Manihot esculenta nuclear transcription factor Y subunit A-1-like (LOC110599666), transcript variant X4, mRNA	sp|Q945M9|NFYA9_ARATH/2.6e-33/Nuclear transcription factor Y subunit A-9 OS=Arabidopsis thaliana OX=3702 GN=NFYA9 PE=1 SV=1	At3g20910/6.0e-33/[K] KOG1561 CCAAT-binding factor, subunit B (HAP2)	isoform_109911/8e-29/CCAAT-binding transcription factor (CBF-B/NF-YA) subunit B	cellular_component:GO:0016602//CCAAT-binding factor complex;molecular_function:GO:0003677//DNA binding;GO:0003700//DNA-binding transcription factor activity;
isoform_109978	signaling transduction (hormone signaling)	40	Sap-miR166, Sap-miR166a, Sap-miR166a-3p, Sap-miR166c, Sap-miR166e, Sap-miR166h-3p, Sap-miR166m	HD-ZIP	homeobox-leucine zipper protein; transcription factor	egr:104449909/0.0e+00/homeobox-leucine zipper protein ATHB-15; K09338 homeobox-leucine zipper protein	0.064	OWM78111.1/0.0e+00/hypothetical protein CDL15_Pgr014930 [Punica granatum]	XM_010064216.2/0.0/XM_010064216.2 PREDICTED: Eucalyptus grandis homeobox-leucine zipper protein ATHB-15 (LOC104449909), mRNA	sp|Q9ZU11|ATB15_ARATH/0.0e+00/Homeobox-leucine zipper protein ATHB-15 OS=Arabidopsis thaliana OX=3702 GN=ATHB-15 PE=1 SV=1	At1g52150/0.0e+00/[K] LSE0187 A Homeodomain protein, contains START domain	isoform_109978/4e-53/START domain	cellular_component:GO:0005634//nucleus;molecular_function:GO:0008289//lipid binding;GO:0003677//DNA binding;
isoform_111305	morphological adaption	41	Sap-miR319	MYBP	transcription factor MYB, plant	egr:104433907/7.3e-46/transcription factor GAMYB; K09422 transcription factor MYB, plant	0.064	PKI41188.1/1.1e-93/hypothetical protein CRG98_038404 [Punica granatum]	XM_017381468.1/0.0/XM_017381468.1 PREDICTED: Daucus carota subsp. sativus transcription factor GAMYB-like (LOC108210186), mRNA	sp|Q94FL7|MY120_ARATH/6.0e-38/Transcription factor MYB120 OS=Arabidopsis thaliana OX=3702 GN=MYB120 PE=2 SV=1	At5g55020/1.4e-37/[K] KOG0048 Transcription factor, Myb superfamily	isoform_111305/1.1e-24/Myb-like DNA-binding domain	cellular_component:GO:0005634//nucleus;molecular_function:GO:0003677//DNA binding;
isoform_111749	signaling transduction (hormone signaling)	42	Sap-miR169h	NFYA, HAP2	nuclear transcription factor Y, alpha; transcription factor	egr:104436440/4.9e-85/nuclear transcription factor Y subunit A-3; K08064 nuclear transcription factor Y, alpha	0.064	OWM83066.1/2.3e-131/hypothetical protein CDL15_Pgr011748 [Punica granatum]	XM_006647928.2/0.0/XM_006647928.2 PREDICTED: Oryza brachyantha nuclear transcription factor Y subunit A-4-like (LOC102706914), mRNA	sp|Q93ZH2|NFYA3_ARATH/6.3e-38/Nuclear transcription factor Y subunit A-3 OS=Arabidopsis thaliana OX=3702 GN=NFYA3 PE=2 SV=2	At1g72830/1.4e-37/[K] KOG1561 CCAAT-binding factor, subunit B (HAP2)	isoform_111749/3.9e-28/CCAAT-binding transcription factor (CBF-B/NF-YA) subunit B	cellular_component:GO:0016602//CCAAT-binding factor complex;molecular_function:GO:0003677//DNA binding;GO:0003700//DNA-binding transcription factor activity;
isoform_112121	signaling transduction (hormone signaling)	43	Sap-miR172c-3p, Sap-miR172d	AP2	AP2-like factor, euAP2 lineage; transcription factor	vvi:100246815/4.7e-55/ethylene-responsive transcription factor RAP2-7; K09284 AP2-like factor, euAP2 lineage	0.064	PKI43284.1/3.0e-98/hypothetical protein CRG98_036370 [Punica granatum]	AP015035.1/0.0/AP015035.1 Vigna angularis var. angularis DNA, chromosome 2, almost complete sequence, cultivar: Shumari	sp|B8AXC3|AP21_ORYSI/2.9e-42/APETALA2-like protein 1 OS=Oryza sativa subsp. indica OX=39946 GN=AP2-1 PE=2 SV=2	At2g28550/2.1e-40/[K] LSE0337 A Ovule development protein/AP2 domain transcription factor	NA	cellular_component:GO:0005634//nucleus;molecular_function:GO:0003677//DNA binding;GO:0003700//DNA-binding transcription factor activity;
isoform_112289	protein turnover, morphological adaption, signaling transduction (hormone signaling)	44	Sap-miR393-5p	TIR1	transport inhibitor response 1	egr:104441079/5.2e-281/protein TRANSPORT INHIBITOR RESPONSE 1; K14485 transport inhibitor response 1	0.064	OWM77537.1/2.6e-305/hypothetical protein CDL15_Pgr016935 [Punica granatum] >PKI74763.1 hypothetical protein CRG98_004872 [Punica granatum]	XM_020844543.1/0.0/XM_020844543.1 PREDICTED: Dendrobium catenatum bidirectional sugar transporter SWEET2a-like (LOC110112344), mRNA	sp|Q570C0|TIR1_ARATH/1.0e-189/Protein TRANSPORT INHIBITOR RESPONSE 1 OS=Arabidopsis thaliana OX=3702 GN=TIR1 PE=1 SV=2	At3g62980/2.3e-189/[R] KOG1947 Leucine rich repeat proteins, some proteins contain F-box	isoform_112289/3.2e-08/Leucine Rich repeats (2 copies)	biological_process:GO:0031146//SCF-dependent proteasomal ubiquitin-dependent protein catabolic process;GO:0016567//protein ubiquitination;cellular_component:GO:0019005//SCF ubiquitin ligase complex;
isoform_112879	morphological adaption, signaling transduction (hormone signaling)	45	Sap-miR160b	K14486, ARF	auxin response factor; transcription factor	var:108338397/6.5e-74/auxin response factor 5; K14486 auxin response factor	0.064	OWM68902.1/5.1e-293/hypothetical protein CDL15_Pgr025089 [Punica granatum]	XM_018826660.1/0.0/XM_018826660.1 PREDICTED: Musa acuminata subsp. malaccensis auxin response factor 18-like (LOC103983875), transcript variant X7, mRNA	sp|Q9SKN5|ARFJ_ARATH/1.5e-193/Auxin response factor 10 OS=Arabidopsis thaliana OX=3702 GN=ARF10 PE=2 SV=1	At2g28350/3.4e-193/[TK] LSE0284 A Auxin response transcription factor	isoform_112879/1.8e-32/Auxin response factor	biological_process:GO:0006355//regulation of transcription, DNA-templated;GO:0009734//auxin-activated signaling pathway;cellular_component:GO:0005634//nucleus;molecular_function:GO:0003677//DNA binding;
isoform_115700	ion homeostasis	46	Sap-nmiR23	SLC9A8, NHE8	solute carrier family 9 (sodium/hydrogen exchanger), member 8	mus:103988569/2.2e-223/sodium/hydrogen exchanger 1; K14724 solute carrier family 9 (sodium/hydrogen exchanger), member 8	0.064	OWM74126.1/1.5e-281/hypothetical protein CDL15_Pgr008437 [Punica granatum]	XM_010026256.2/0.0/XM_010026256.2 PREDICTED: Eucalyptus grandis sodium/hydrogen exchanger 2 (LOC104415033), transcript variant X5, mRNA	sp|Q68KI4|NHX1_ARATH/3.9e-226/Sodium/hydrogen exchanger 1 OS=Arabidopsis thaliana OX=3702 GN=NHX1 PE=1 SV=2	At5g27150/9.0e-226/[P] KOG1965 Sodium/hydrogen exchanger protein	isoform_115700/1.7e-59/Sodium/hydrogen exchanger family	biological_process:GO:0055075//potassium ion homeostasis;GO:0009651//response to salt stress;GO:0006885//regulation of pH;cellular_component:GO:0005774//vacuolar membrane;GO:0016021//integral component of membrane;GO:0005886//plasma membrane;molecular_function:GO:0015385//sodium:proton antiporter activity;
isoform_116376	protein turnover, morphological adaption, signaling transduction (hormone signaling)	47	Sap-miR393-5p	TIR1	transport inhibitor response 1	egr:104441079/2.1e-143/protein TRANSPORT INHIBITOR RESPONSE 1; K14485 transport inhibitor response 1	0.064	OWM77537.1/2.7e-163/hypothetical protein CDL15_Pgr016935 [Punica granatum] >PKI74763.1 hypothetical protein CRG98_004872 [Punica granatum]	XM_020419827.1/0.0/XM_020419827.1 PREDICTED: Asparagus officinalis rop guanine nucleotide exchange factor 7-like (LOC109849936), mRNA	sp|Q570C0|TIR1_ARATH/1.1e-100/Protein TRANSPORT INHIBITOR RESPONSE 1 OS=Arabidopsis thaliana OX=3702 GN=TIR1 PE=1 SV=2	At3g62980/2.4e-100/[R] KOG1947 Leucine rich repeat proteins, some proteins contain F-box	isoform_116376/6.4e-07/Leucine Rich repeats (2 copies)	biological_process:GO:0009734//auxin-activated signaling pathway;GO:0031146//SCF-dependent proteasomal ubiquitin-dependent protein catabolic process;GO:0016567//protein ubiquitination;cellular_component:GO:0016021//integral component of membrane;GO:0019005//SCF ubiquitin ligase complex;molecular_function:GO:0000822//inositol hexakisphosphate binding;
isoform_116540	signaling transduction (hormone signaling)	48	Sap-miR171	DELLA	DELLA protein	bdi:100837983/1.2e-16/DELLA protein SLR1; K14494 DELLA protein	0.064	OWM64907.1/4.1e-114/hypothetical protein CDL15_Pgr028624 [Punica granatum]	XM_018964800.1/0.0/XM_018964800.1 PREDICTED: Juglans regia scarecrow-like protein 27 (LOC108990734), mRNA	sp|O81316|SCL6_ARATH/8.3e-56/Scarecrow-like protein 6 OS=Arabidopsis thaliana OX=3702 GN=SCL6 PE=1 SV=1	At4g00150/1.9e-55/[TK] LSE0487 A Gibberellin response modulator/Predicted transcription factor	isoform_116540/2.2e-49/GRAS domain family	NA
isoform_116599		49	Sap-miR156a	CDL15	hypothetical protein	NA	0.064	OWM89780.1/4.7e-48/hypothetical protein CDL15_Pgr024528 [Punica granatum] >PKI54218.1 hypothetical protein CRG98_025372 [Punica granatum]	NA	NA	NA	NA	cellular_component:GO:0005634//nucleus;molecular_function:GO:0046872//metal ion binding;GO:0003677//DNA binding;
isoform_117484		50	Sap-miR164a, Sap-miR164b	E1.16.1.7	ferric-chelate reductase	cmos:111447866/2.1e-19/ferric reduction oxidase 7, chloroplastic-like; K00521 ferric-chelate reductase [EC:1.16.1.7]	0.064	XP_021647079.1/4.6e-55/NAC domain-containing protein 21/22-like [Hevea brasiliensis]	JX534240.1/0.0/JX534240.1 Populus tremula x Populus alba NAC1 mRNA, complete cds	sp|Q84TE6|NAC22_ARATH/2.8e-49/NAC domain-containing protein 21/22 OS=Arabidopsis thaliana OX=3702 GN=NAC021 PE=1 SV=2	At1g56010/6.3e-49/[S] LSE0117 A No apical meristem (NAM) developmental protein and related proteins	NA	biological_process:GO:0006355//regulation of transcription, DNA-templated;cellular_component:GO:0005634//nucleus;molecular_function:GO:0003677//DNA binding;
isoform_118289		51	Sap-miR396b	PSMC5, RPT6	26S proteasome regulatory subunit T6	cit:102610684/8.3e-144/26S proteasome regulatory subunit 8 homolog A; K03066 26S proteasome regulatory subunit T6	0.064	KDO80362.1/6.1e-143/hypothetical protein CISIN_1g014743mg [Citrus sinensis]	XM_018992329.1/0.0/XM_018992329.1 PREDICTED: Juglans regia 26S protease regulatory subunit 8 homolog A-like (LOC109011222), transcript variant X1, mRNA	sp|Q9C5U3|PRS8A_ARATH/2.2e-139/26S proteasome regulatory subunit 8 homolog A OS=Arabidopsis thaliana OX=3702 GN=RPT6A PE=1 SV=1	At5g19990/4.8e-137/[O] KOG0728 26S proteasome regulatory complex, ATPase RPT6	isoform_118289/3.4e-27/ATPase family associated with various cellular activities (AAA)	biological_process:GO:0030163//protein catabolic process;cellular_component:GO:0005737//cytoplasm;molecular_function:GO:0016787//hydrolase activity;GO:0005524//ATP binding;
isoform_119625		52	Sap-nmiR10	F3H	naringenin 3-dioxygenase	hbr:110641151/1.1e-61/naringenin,2-oxoglutarate 3-dioxygenase-like; K00475 naringenin 3-dioxygenase [EC:1.14.11.9]	0.064	OWM88964.1/2.4e-65/hypothetical protein CDL15_Pgr020918 [Punica granatum]	XM_010035184.2/0.0/XM_010035184.2 PREDICTED: Eucalyptus grandis naringenin,2-oxoglutarate 3-dioxygenase (LOC104422756), mRNA	sp|Q7XZQ7|FL3H_PETCR/1.4e-59/Flavanone 3-dioxygenase OS=Petroselinum crispum OX=4043 GN=FHT PE=1 SV=1	At3g51240/1.2e-56/[QR] KOG0143 Iron/ascorbate family oxidoreductases	NA	molecular_function:GO:0046872//metal ion binding;GO:0051213//dioxygenase activity;GO:0016491//oxidoreductase activity;
isoform_119912		53	Sap-miR394a_1	CDL15	hypothetical protein	NA	0.064	OWM76213.1/3.4e-126/hypothetical protein CDL15_Pgr009859 [Punica granatum] >PKI76994.1 hypothetical protein CRG98_002497 [Punica granatum]	NA	sp|Q9FZK1|FBX6_ARATH/1.4e-105/F-box only protein 6 OS=Arabidopsis thaliana OX=3702 GN=FBX6 PE=2 SV=1	At1g27340/3.2e-105/[R] LSE0005 A F-box domain	isoform_119912/2e-07/Kelch motif	NA
isoform_120060		54	Sap-miR394a_1, Sap-miR394a_2	CDL15	hypothetical protein	NA	0.064	OWM76213.1/5.3e-52/hypothetical protein CDL15_Pgr009859 [Punica granatum] >PKI76994.1 hypothetical protein CRG98_002497 [Punica granatum]	XM_010027007.2/0.0/XM_010027007.2 PREDICTED: Eucalyptus grandis F-box only protein 6 (LOC104415679), mRNA	sp|Q9FZK1|FBX6_ARATH/6.3e-39/F-box only protein 6 OS=Arabidopsis thaliana OX=3702 GN=FBX6 PE=2 SV=1	At1g27340/1.4e-38/[R] LSE0005 A F-box domain	isoform_120060/0.019/Galactose oxidase, central domain	NA
isoform_12132	signaling transduction (hormone signaling)	55	Sap-miR156a	BRI1	protein brassinosteroid insensitive 1	mdm:103401427/7.6e-16/uncharacterized LOC103401427; K13415 protein brassinosteroid insensitive 1 [EC:2.7.10.1 2.7.11.1]	0.129	OWM90356.1/1.6e-208/hypothetical protein CDL15_Pgr014658 [Punica granatum]	KT601175.1/0.0/KT601175.1 Citrus clementina squamosa promoter-binding protein 4 mRNA, complete cds	sp|Q94JW8|SPL6_ARATH/9.8e-46/Squamosa promoter-binding-like protein 6 OS=Arabidopsis thaliana OX=3702 GN=SPL6 PE=1 SV=2	NA	isoform_12132/4.8e-32/SBP domain	cellular_component:GO:0005634//nucleus;molecular_function:GO:0046872//metal ion binding;GO:0003677//DNA binding;
isoform_12190		56	Sap-miR396b	CDL15	hypothetical protein	NA	0.129	OWM72127.1/7.1e-26/hypothetical protein CDL15_Pgr018010 [Punica granatum]	NA	sp|Q66GQ2|Y5162_ARATH/5.5e-12/Uncharacterized protein At5g41620 OS=Arabidopsis thaliana OX=3702 GN=At5g41620 PE=2 SV=2	At5g41620/1.3e-11/[S] LSE0124 A Uncharacterized protein	NA	cellular_component:GO:0005886//plasma membrane;GO:0009507//chloroplast;
isoform_122100		57	Sap-nmiR10	RBMX, HNRNPG	heterogeneous nuclear ribonucleoprotein G	lja:Lj1g3v2898460.1/4.4e-108/Lj1g3v2898460.1; -; K12885 heterogeneous nuclear ribonucleoprotein G	0.064	PKI67830.1/2.1e-215/hypothetical protein CRG98_011803 [Punica granatum]	JF317380.1/0.0/JF317380.1 Celtis tetrandra 26S ribosomal RNA gene, partial sequence	NA	Hs8850217/1.8e-14/[A] LSE3565 H RNA binding motif protein probably involved in spermatogenesis, and related proteins	isoform_122100/7.9e-12/RNA recognition motif. (a.k.a. RRM, RBD, or RNP domain)	cellular_component:GO:0005634//nucleus;molecular_function:GO:0003729//mRNA binding;GO:0003723//RNA binding;
isoform_122661	signaling transduction (hormone signaling)	58	Sap-miR396a-5p, Sap-miR396b, Sap-miR396h	NIPA, SLC57A2S	magnesium transporter	pda:103722218/4.0e-38/probable magnesium transporter NIPA4; K22733 magnesium transporter	0.064	PKI62417.1/5.7e-41/hypothetical protein CRG98_017223 [Punica granatum]	XM_010258047.2/0.0/XM_010258047.2 PREDICTED: Nelumbo nucifera probable magnesium transporter NIPA4 (LOC104596768), mRNA	sp|Q9LNK7|NIPA3_ARATH/1.1e-30/Probable magnesium transporter NIPA3 OS=Arabidopsis thaliana OX=3702 GN=At1g34470 PE=2 SV=1	At1g34470/2.6e-30/[S] KOG2922 Uncharacterized conserved protein	NA	cellular_component:GO:0016021//integral component of membrane;GO:0005886//plasma membrane;GO:0005769//early endosome;molecular_function:GO:0015095//magnesium ion transmembrane transporter activity;
isoform_123012		59	Sap-miR169a-3p	M3KE1	MAP3K epsilon protein kinase 1	NA	0.064	XP_021292552.1/2.5e-126/MAP3K epsilon protein kinase 1-like [Herrania umbratica]	XM_018864128.1/0.0/XM_018864128.1 PREDICTED: Eucalyptus grandis MAP3K epsilon protein kinase 1-like (LOC104421592), mRNA	sp|Q9LJD8|M3KE1_ARATH/8.6e-121/MAP3K epsilon protein kinase 1 OS=Arabidopsis thaliana OX=3702 GN=M3KE1 PE=1 SV=1	At3g13530/2.0e-120/[T] KOG0198 MEKK and related serine/threonine protein kinases	isoform_123012/0.0043/Armadillo/beta-catenin-like repeat	molecular_function:GO:0005524//ATP binding;GO:0004672//protein kinase activity;
isoform_123539		60	Sap-miR156a	CRG98	malaccensis squamosa promoter-binding-like protein 3	NA	0.064	PKI79470.1/8.3e-37/hypothetical protein CRG98_000101 [Punica granatum]	XM_009394540.2/0.0/XM_009394540.2 PREDICTED: Musa acuminata subsp. malaccensis squamosa promoter-binding-like protein 3 (LOC103978663), mRNA	sp|P93015|SPL3_ARATH/6.7e-20/Squamosa promoter-binding-like protein 3 OS=Arabidopsis thaliana OX=3702 GN=SPL3 PE=1 SV=2	NA	NA	biological_process:GO:0009908//flower development;cellular_component:GO:0005634//nucleus;molecular_function:GO:0046872//metal ion binding;GO:0003677//DNA binding;GO:0003700//DNA-binding transcription factor activity;
isoform_124151		61	Sap-nmiR10	XYL4	synaptotagmin-1	zma:103654454/5.8e-19/probable beta-D-xylosidase 7; K15920 xylan 1,4-beta-xylosidase [EC:3.2.1.37]	0.064	PKI48766.1/1.4e-42/hypothetical protein CRG98_030848 [Punica granatum]	KM117267.1/0.0/KM117267.1 Hibiscus syriacus 18S ribosomal RNA gene, internal transcribed spacer 1, 5.8S ribosomal RNA gene, and internal transcribed spacer 2, complete sequence; and 26S ribosomal RNA gene, partial sequence	sp|Q9SGZ5|BXL7_ARATH/2.1e-22/Probable beta-D-xylosidase 7 OS=Arabidopsis thaliana OX=3702 GN=BXL7 PE=2 SV=2	At1g78060/4.7e-22/[GR] TWOG0186 Predicted beta-D-xylosidase	NA	biological_process:GO:0045493//xylan catabolic process;GO:0005975//carbohydrate metabolic process;GO:0031222//arabinan catabolic process;cellular_component:GO:0009505//plant-type cell wall;molecular_function:GO:0046556//alpha-L-arabinofuranosidase activity;GO:0004553//hydrolase activity, hydrolyzing O-glycosyl compounds;GO:0009044//xylan 1,4-beta-xylosidase activity;
isoform_12446	signaling transduction (hormone signaling)	62	Sap-miR396a-3p_4, Sap-miR396b-3p	OVM, ANT	AP2-like factor, ANT lineage; transcription factor	zju:107420624/1.0e-92/AP2-like ethylene-responsive transcription factor ANT; K09285 AP2-like factor, ANT lineage	0.129	PKI72473.1/1.5e-129/hypothetical protein CRG98_007140 [Punica granatum]	XM_007160891.1/0.0/XM_007160891.1 Phaseolus vulgaris hypothetical protein (PHAVU_001G031200g) mRNA, complete cds	sp|Q84Z02|CRL5_ORYSJ/1.4e-63/AP2-like ethylene-responsive transcription factor CRL5 OS=Oryza sativa subsp. japonica OX=39947 GN=CRL5 PE=2 SV=1	At4g37750/3.4e-57/[K] LSE0337 A Ovule development protein/AP2 domain transcription factor	NA	cellular_component:GO:0005634//nucleus;molecular_function:GO:0003677//DNA binding;GO:0003700//DNA-binding transcription factor activity;
isoform_126103		63	Sap-miR156a	CDL15	hypothetical protein	NA	0.064	OWM65213.1/4.7e-73/hypothetical protein CDL15_Pgr008802 [Punica granatum] >PKI47710.1 hypothetical protein CRG98_031843 [Punica granatum]	NA	NA	NA	NA	cellular_component:GO:0005634//nucleus;molecular_function:GO:0046872//metal ion binding;GO:0003677//DNA binding;
isoform_126933	signaling transduction (hormone signaling)	64	Sap-miR156a	BRI1	protein brassinosteroid insensitive 1	mdm:103401427/5.1e-18/uncharacterized LOC103401427; K13415 protein brassinosteroid insensitive 1 [EC:2.7.10.1 2.7.11.1]	0.064	OWM89780.1/2.2e-54/hypothetical protein CDL15_Pgr024528 [Punica granatum] >PKI54218.1 hypothetical protein CRG98_025372 [Punica granatum]	XM_009373979.2/0.0/XM_009373979.2 PREDICTED: Pyrus x bretschneideri teosinte glume architecture 1-like (LOC103961437), mRNA	sp|B9DI20|SP13A_ARATH/1.2e-38/Squamosa promoter-binding-like protein 13A OS=Arabidopsis thaliana OX=3702 GN=SPL13A PE=2 SV=1	NA	isoform_126933/1.1e-30/SBP domain	cellular_component:GO:0005634//nucleus;molecular_function:GO:0046872//metal ion binding;GO:0003677//DNA binding;
isoform_127146		65	Sap-miR164b	rbcL, cbbL	ribulose-bisphosphate carboxylase large chain	bdi:112271745/5.1e-07/uncharacterized protein LOC112271745; K01601 ribulose-bisphosphate carboxylase large chain [EC:4.1.1.39]	0.064	YP_173415.1/9.5e-10/hypothetical protein NitaMp073 [Nicotiana tabacum] >BAD83479.1 hypothetical protein (mitochondrion) [Nicotiana tabacum]	HQ664598.1/0.0/HQ664598.1 Berberidopsis corallina ribosomal protein L2 (rpl2) and ribosomal protein L23 (rpl23) genes, complete cds; tRNA-Ile (trnI-CAU) gene, complete sequence; hypothetical chloroplast RF2 (ycf2) gene, complete cds; tRNA-Leu (trnL-CAA) gene, complete sequence; NADH-plastoquinone oxidoreductase subunit 2 (ndhB) and ribosomal protein S7 (rps7) genes, complete cds; ribosomal protei…	NA	NA	NA	cellular_component:GO:0005739//mitochondrion;
isoform_128023	protein turnover, morphological adaption, signaling transduction (hormone signaling)	66	Sap-miR393-5p	TIR1	transport inhibitor response 1	nto:104098060/1.7e-64/protein TRANSPORT INHIBITOR RESPONSE 1-like; K14485 transport inhibitor response 1	0.064	OMO76538.1/2.0e-72/Leucine-rich repeat, cysteine-containing subtype [Corchorus capsularis]	NA	sp|Q0DKP3|TIR1A_ORYSJ/2.2e-41/Transport inhibitor response 1-like protein Os05g0150500 OS=Oryza sativa subsp. japonica OX=39947 GN=Os05g0150500 PE=2 SV=2	At3g26810/1.9e-40/[R] KOG1947 Leucine rich repeat proteins, some proteins contain F-box	NA	NA
isoform_128772	signaling transduction (hormone signaling)	67	Sap-miR169a-5p, Sap-miR169b-5p, Sap-miR169d-5p, Sap-miR169e, Sap-miR169h, Sap-miR169v	NFYA, HAP2	nuclear transcription factor Y, alpha; transcription factor	cam:101504175/3.7e-82/nuclear transcription factor Y subunit A-1; K08064 nuclear transcription factor Y, alpha	0.064	XP_027334272.1/9.0e-85/nuclear transcription factor Y subunit A-1 isoform X1 [Abrus precatorius] >XP_027334273.1 nuclear transcription factor Y subunit A-1 isoform X1 [Abrus precatorius] >XP_027334274.1 nuclear transcription factor Y subunit A-1 isoform X1 [Abrus precatorius]	XM_021736177.1/0.0/XM_021736177.1 PREDICTED: Manihot esculenta nuclear transcription factor Y subunit A-1-like (LOC110599666), transcript variant X4, mRNA	sp|Q9LXV5|NFYA1_ARATH/2.1e-51/Nuclear transcription factor Y subunit A-1 OS=Arabidopsis thaliana OX=3702 GN=NFYA1 PE=2 SV=1	At5g12840/4.8e-51/[K] KOG1561 CCAAT-binding factor, subunit B (HAP2)	isoform_128772/3.4e-28/CCAAT-binding transcription factor (CBF-B/NF-YA) subunit B	cellular_component:GO:0016602//CCAAT-binding factor complex;molecular_function:GO:0003677//DNA binding;GO:0003700//DNA-binding transcription factor activity;
isoform_129584	signaling transduction (hormone signaling)	68	Sap-nmiR3	SNF1	carbon catabolite-derepressing protein kinase	zju:107405116/7.8e-147/CBL-interacting serine/threonine-protein kinase 4-like; K12761 carbon catabolite-derepressing protein kinase [EC:2.7.11.1]	0.064	OWM71625.1/2.0e-191/hypothetical protein CDL15_Pgr005812 [Punica granatum]	AB608025.1/0.0/AB608025.1 Ziziphus jujuba APX mRNA for ascorbate peroxidase, complete cds	sp|Q9SUL7|CIPK4_ARATH/1.7e-128/CBL-interacting serine/threonine-protein kinase 4 OS=Arabidopsis thaliana OX=3702 GN=CIPK4 PE=1 SV=1	At4g14580/4.0e-128/[T] KOG0583 Serine/threonine protein kinase	isoform_129584/2.3e-66/Protein kinase domain	biological_process:GO:0007165//signal transduction;molecular_function:GO:0004674//protein serine/threonine kinase activity;GO:0005524//ATP binding;
isoform_129679	signaling transduction (hormone signaling)	69	Sap-miR166a, Sap-miR166a-3p, Sap-miR166c, Sap-miR166e, Sap-miR166m	HD-ZIP	homeobox-leucine zipper protein; transcription factor	rcu:8266275/0.0e+00/homeobox-leucine zipper protein REVOLUTA; K09338 homeobox-leucine zipper protein	0.064	PKI63850.1/0.0e+00/hypothetical protein CRG98_015733 [Punica granatum]	XM_010652862.2/0.0/XM_010652862.2 PREDICTED: Vitis vinifera homeobox-leucine zipper protein REVOLUTA (LOC100243208), transcript variant X2, mRNA	sp|Q9SE43|REV_ARATH/0.0e+00/Homeobox-leucine zipper protein REVOLUTA OS=Arabidopsis thaliana OX=3702 GN=REV PE=1 SV=2	At5g60690/0.0e+00/[K] LSE0187 A Homeodomain protein, contains START domain	isoform_129679/1.3e-48/MEKHLA domain	cellular_component:GO:0005634//nucleus;molecular_function:GO:0008289//lipid binding;GO:0003677//DNA binding;
isoform_129873	ion homeostasis	70	Sap-nmiR1	ATPF1B, atpD	F-type H+/Na+-transporting ATPase subunit beta	ghi:107955307/2.6e-66/ATP synthase subunit beta, chloroplastic-like; K02112 F-type H+/Na+-transporting ATPase subunit beta [EC:7.1.2.2 7.2.2.1]	0.064	RDY14683.1/3.0e-66/ATP synthase subunit beta, chloroplastic, partial [Mucuna pruriens]	KT358807.1/0.0/KT358807.1 Lagerstroemia fauriei chloroplast, complete genome	sp|Q4VZI5|ATPB_CUCSA/3.8e-55/ATP synthase subunit beta, chloroplastic OS=Cucumis sativus OX=3659 GN=atpB PE=3 SV=2	AtCh030/6.9e-52/[C] KOG1350 F0F1-type ATP synthase, beta subunit	NA	biological_process:GO:0015986//ATP synthesis coupled proton transport;cellular_component:GO:0045261//proton-transporting ATP synthase complex, catalytic core F(1);GO:0016021//integral component of membrane;GO:0009536//plastid;molecular_function:GO:0005524//ATP binding;GO:0051539//4 iron, 4 sulfur cluster binding;GO:0048038//quinone binding;GO:0008137//NADH dehydrogenase (ubiquinone) activity;GO:0…
isoform_130923		71	Sap-miR398b	COX5B	cytochrome c oxidase subunit 5b	egr:104449471/3.2e-17/cytochrome c oxidase subunit 5b-1, mitochondrial; K02265 cytochrome c oxidase subunit 5b	0.064	XP_010061943.1/2.4e-16/PREDICTED: cytochrome c oxidase subunit 5b-1, mitochondrial [Eucalyptus grandis]	NA	sp|Q9SSB8|CX5B2_ARATH/5.5e-15/Cytochrome c oxidase subunit 5b-2, mitochondrial OS=Arabidopsis thaliana OX=3702 GN=COX5B-2 PE=1 SV=1	At1g80230/1.3e-14/[C] KOG3352 Cytochrome c oxidase, subunit Vb/COX4	NA	cellular_component:GO:0005740//mitochondrial envelope;molecular_function:GO:0004129//cytochrome-c oxidase activity;
isoform_132431		72	Sap-nmiR10	PGRMC1_2	membrane-associated progesterone receptor component	mesc:110600105/4.6e-85/membrane steroid-binding protein 2-like; K17278 membrane-associated progesterone receptor component	0.064	OWM75624.1/1.7e-91/hypothetical protein CDL15_Pgr021789 [Punica granatum] >PKI32927.1 hypothetical protein CRG98_046701 [Punica granatum]	XM_009341731.2/0.0/XM_009341731.2 PREDICTED: Pyrus x bretschneideri membrane steroid-binding protein 1-like (LOC103932182), mRNA	sp|Q9FVZ7|MSBP1_ORYSJ/4.0e-71/Membrane steroid-binding protein 1 OS=Oryza sativa subsp. japonica OX=39947 GN=MSBP1 PE=1 SV=1	At3g48890/3.3e-68/[R] KOG1110 Putative steroid membrane receptor Hpr6.6/25-Dx	isoform_132431/5.5e-14/Cytochrome b5-like Heme/Steroid binding domain	cellular_component:GO:0016021//integral component of membrane;
isoform_134628	signaling transduction (MAPK signaling)	73	Sap-nmiR6	TMEM33	transmembrane protein 33	pper:18782167/6.9e-21/uncharacterized protein LOC18782167; K20724 transmembrane protein 33	0.064	OWM82888.1/1.3e-31/hypothetical protein CDL15_Pgr005288 [Punica granatum] >PKI64804.1 hypothetical protein CRG98_014800 [Punica granatum]	XM_018646657.1/0.0/XM_018646657.1 PREDICTED: Pyrus x bretschneideri xaa-Pro dipeptidase (LOC103943958), transcript variant X2, mRNA	NA	At3g24820/7.1e-19/[RK] LSE0587 A Predicted transcription factor, contains BSD domain	isoform_134628/1.6e-10/BSD domain	NA
isoform_136338		74	Sap-nmiR3	CPSF3L, INTS11	integrator complex subunit 11	pop:7459752/1.4e-23/LOW QUALITY PROTEIN: cleavage and polyadenylation specificity factor subunit 3-II; K13148 integrator complex subunit 11 [EC:3.1.27.-]	0.064	PKI65315.1/8.5e-62/hypothetical protein CRG98_014279 [Punica granatum]	NA	sp|Q9LN71|RING1_ARATH/2.3e-40/E3 ubiquitin-protein ligase At1g12760 OS=Arabidopsis thaliana OX=3702 GN=At1g12760 PE=1 SV=1	At1g63170/1.4e-37/[O] KOG0800 FOG: Predicted E3 ubiquitin ligase	NA	cellular_component:GO:0016021//integral component of membrane;
isoform_137079		75	Sap-nmiR10	RP-S30e, RPS30	small subunit ribosomal protein S30e; transcription factor	dct:110101929/4.1e-28/40S ribosomal protein S30-like; K02983 small subunit ribosomal protein S30e	0.064	CBI35991.3/6.1e-28/unnamed protein product, partial [Vitis vinifera]	AF479103.1/0.0/AF479103.1 Spiraea betulifolia 26S ribosomal RNA gene, complete sequence	sp|P49689|RS30_ARATH/4.4e-28/40S ribosomal protein S30 OS=Arabidopsis thaliana OX=3702 GN=RPS30A PE=3 SV=3	At5g56670/1.0e-27/[JO] KOG0009 Ubiquitin-like/40S ribosomal S30 protein fusion	NA	biological_process:GO:0006412//translation;cellular_component:GO:0005840//ribosome;GO:0022627//cytosolic small ribosomal subunit;molecular_function:GO:0003735//structural constituent of ribosome;
isoform_137211	signaling transduction (hormone signaling)	76	Sap-miR156a	BRI1	protein brassinosteroid insensitive 1	mdm:103401427/8.2e-16/uncharacterized LOC103401427; K13415 protein brassinosteroid insensitive 1 [EC:2.7.10.1 2.7.11.1]	0.064	OWM89780.1/4.7e-153/hypothetical protein CDL15_Pgr024528 [Punica granatum] >PKI54218.1 hypothetical protein CRG98_025372 [Punica granatum]	XM_012230324.2/0.0/XM_012230324.2 PREDICTED: Jatropha curcas squamosa promoter-binding-like protein 16 (LOC105644836), transcript variant X5, mRNA	sp|Q6YZE8|SPL16_ORYSJ/3.2e-50/Squamosa promoter-binding-like protein 16 OS=Oryza sativa subsp. japonica OX=39947 GN=SPL16 PE=2 SV=1	NA	isoform_137211/1.3e-30/SBP domain	cellular_component:GO:0005634//nucleus;molecular_function:GO:0046872//metal ion binding;GO:0003677//DNA binding;
isoform_139002		77	Sap-miR396b	PSMC5, RPT6	26S proteasome regulatory subunit T6	dct:110116036/1.6e-68/26S protease regulatory subunit 8 homolog A; K03066 26S proteasome regulatory subunit T6	0.064	XP_020705135.1/1.2e-67/26S protease regulatory subunit 8 homolog A [Dendrobium catenatum] >XP_020705136.1 26S protease regulatory subunit 8 homolog A [Dendrobium catenatum] >PKU62340.1 26S protease regulatory subunit 8 like A [Dendrobium catenatum]	XM_021788803.1/0.0/XM_021788803.1 PREDICTED: Hevea brasiliensis 26S proteasome regulatory subunit 8 homolog A-like (LOC110638295), transcript variant X2, mRNA	sp|Q9C5U3|PRS8A_ARATH/3.5e-69/26S proteasome regulatory subunit 8 homolog A OS=Arabidopsis thaliana OX=3702 GN=RPT6A PE=1 SV=1	At5g20000/8.0e-69/[O] KOG0728 26S proteasome regulatory complex, ATPase RPT6	isoform_139002/1.3e-22/ATPase family associated with various cellular activities (AAA)	biological_process:GO:0030163//protein catabolic process;cellular_component:GO:0005737//cytoplasm;molecular_function:GO:0008233//peptidase activity;GO:0005524//ATP binding;
isoform_139360	signaling transduction (hormone signaling)	78	Sap-miR166, Sap-miR166a-3p, Sap-miR166c, Sap-miR166e, Sap-miR166m	HD-ZIP	homeobox-leucine zipper protein; transcription factor	egr:104449909/0.0e+00/homeobox-leucine zipper protein ATHB-15; K09338 homeobox-leucine zipper protein	0.064	OWM78111.1/0.0e+00/hypothetical protein CDL15_Pgr014930 [Punica granatum]	XM_010064216.2/0.0/XM_010064216.2 PREDICTED: Eucalyptus grandis homeobox-leucine zipper protein ATHB-15 (LOC104449909), mRNA	sp|Q9ZU11|ATB15_ARATH/0.0e+00/Homeobox-leucine zipper protein ATHB-15 OS=Arabidopsis thaliana OX=3702 GN=ATHB-15 PE=1 SV=1	At1g52150/0.0e+00/[K] LSE0187 A Homeodomain protein, contains START domain	isoform_139360/4e-53/START domain	cellular_component:GO:0005634//nucleus;molecular_function:GO:0008289//lipid binding;GO:0003677//DNA binding;
isoform_140631	signaling transduction (hormone signaling)	79	Sap-miR156a	BRI1	protein brassinosteroid insensitive 1	mdm:103401427/1.2e-14/uncharacterized LOC103401427; K13415 protein brassinosteroid insensitive 1 [EC:2.7.10.1 2.7.11.1]	0.064	OWM80155.1/9.7e-32/hypothetical protein CDL15_Pgr019319 [Punica granatum] >PKI79516.1 hypothetical protein CRG98_000085 [Punica granatum]	XM_010663046.2/0.0/XM_010663046.2 PREDICTED: Vitis vinifera squamosa promoter-binding-like protein 7 (LOC100246212), transcript variant X2, mRNA	sp|Q7XT42|SPL7_ORYSJ/2.8e-28/Squamosa promoter-binding-like protein 7 OS=Oryza sativa subsp. japonica OX=39947 GN=SPL7 PE=2 SV=2	NA	isoform_140631/4.3e-26/SBP domain	cellular_component:GO:0005634//nucleus;molecular_function:GO:0046872//metal ion binding;GO:0003677//DNA binding;
isoform_141036	signaling transduction (hormone signaling)	80	Sap-miR4995	SNF1	carbon catabolite-derepressing protein kinase	jre:108989474/4.2e-144/CBL-interacting serine/threonine-protein kinase 7-like; K12761 carbon catabolite-derepressing protein kinase [EC:2.7.11.1]	0.064	OWM87838.1/8.3e-205/hypothetical protein CDL15_Pgr019422 [Punica granatum] >PKI51107.1 hypothetical protein CRG98_028487 [Punica granatum]	MF362689.1/0.0/MF362689.1 Ambrosia artemisiifolia chloroplast, complete genome	sp|Q9SUL7|CIPK4_ARATH/2.9e-127/CBL-interacting serine/threonine-protein kinase 4 OS=Arabidopsis thaliana OX=3702 GN=CIPK4 PE=1 SV=1	At4g14580/6.7e-127/[T] KOG0583 Serine/threonine protein kinase	isoform_141036/1.9e-67/Protein kinase domain	biological_process:GO:0007165//signal transduction;molecular_function:GO:0004674//protein serine/threonine kinase activity;GO:0005524//ATP binding;
isoform_141673	signaling transduction (hormone signaling)	81	Sap-miR156a	BRI1	protein brassinosteroid insensitive 1	mdm:103401427/1.0e-16/uncharacterized LOC103401427; K13415 protein brassinosteroid insensitive 1 [EC:2.7.10.1 2.7.11.1]	0.064	OWM90601.1/7.5e-93/hypothetical protein CDL15_Pgr014904 [Punica granatum] >PKI43351.1 hypothetical protein CRG98_036247 [Punica granatum]	KC110080.1/0.0/KC110080.1 Betula luminifera SBP-box transcription factor (SPL1) mRNA, complete cds	sp|B9DI20|SP13A_ARATH/2.0e-39/Squamosa promoter-binding-like protein 13A OS=Arabidopsis thaliana OX=3702 GN=SPL13A PE=2 SV=1	NA	isoform_141673/1e-26/SBP domain	cellular_component:GO:0005634//nucleus;molecular_function:GO:0046872//metal ion binding;GO:0003677//DNA binding;
isoform_142399		82	Sap-miR8051-5p	RP-L11, MRPL11, rplK	large subunit ribosomal protein L11	egr:104441589/1.3e-47/50S ribosomal protein L11, chloroplastic; K02867 large subunit ribosomal protein L11	0.064	OWM72238.1/6.7e-48/hypothetical protein CDL15_Pgr018123 [Punica granatum] >PKI38507.1 hypothetical protein CRG98_041109 [Punica granatum]	XM_010054739.2/0.0/XM_010054739.2 PREDICTED: Eucalyptus grandis 50S ribosomal protein L11, chloroplastic (LOC104441589), mRNA	sp|Q9MAP3|RK11_ARATH/4.1e-47/50S ribosomal protein L11, chloroplastic OS=Arabidopsis thaliana OX=3702 GN=RPL11 PE=2 SV=1	At1g32990/9.3e-47/[J] KOG3257 Mitochondrial/chloroplast ribosomal protein L11	isoform_142399/1.1e-29/Ribosomal protein L11, N-terminal domain	biological_process:GO:0000027//ribosomal large subunit assembly;GO:0006412//translation;cellular_component:GO:0005840//ribosome;GO:0015934//large ribosomal subunit;GO:0022625//cytosolic large ribosomal subunit;molecular_function:GO:0003735//structural constituent of ribosome;GO:0070180//large ribosomal subunit rRNA binding;GO:0019843//rRNA binding;
isoform_143177		83	Sap-miR172b_2	E1.16.1.7	ferric-chelate reductase	cmos:111447866/3.2e-30/ferric reduction oxidase 7, chloroplastic-like; K00521 ferric-chelate reductase [EC:1.16.1.7]	0.064	OWM76351.1/2.3e-77/hypothetical protein CDL15_Pgr028221 [Punica granatum]	XM_022302032.1/0.0/XM_022302032.1 PREDICTED: Momordica charantia NAC domain-containing protein 2-like (LOC111024376), mRNA	sp|Q7F2L3|NAC48_ORYSJ/1.8e-55/NAC domain-containing protein 48 OS=Oryza sativa subsp. japonica OX=39947 GN=NAC048 PE=1 SV=1	At1g01720/1.6e-54/[S] LSE0117 A No apical meristem (NAM) developmental protein and related proteins	isoform_143177/8.1e-20/No apical meristem (NAM) protein	biological_process:GO:0006355//regulation of transcription, DNA-templated;cellular_component:GO:0005634//nucleus;molecular_function:GO:0003677//DNA binding;
isoform_144618	nutrient modulation, ion homeostasis	84	Sap-nmiR6	NRT, narK, nrtP, nasA	MFS transporter, NNP family, nitrate/nitrite transporter	egr:104422626/9.5e-187/high affinity nitrate transporter 2.7; K02575 MFS transporter, NNP family, nitrate/nitrite transporter	0.064	OWM70639.1/3.4e-225/hypothetical protein CDL15_Pgr014312 [Punica granatum] >PKI55186.1 hypothetical protein CRG98_024477 [Punica granatum]	XM_018864152.1/0.0/XM_018864152.1 PREDICTED: Eucalyptus grandis high affinity nitrate transporter 2.7 (LOC104422626), transcript variant X2, mRNA	sp|Q9LYK2|NRT27_ARATH/9.6e-169/High affinity nitrate transporter 2.7 OS=Arabidopsis thaliana OX=3702 GN=NRT2.7 PE=2 SV=1	At5g14570/2.2e-168/[P] LSE0461 A High affinity nitrate transporter	isoform_144618/2.7e-27/Major Facilitator Superfamily	biological_process:GO:0055085//transmembrane transport;cellular_component:GO:0016021//integral component of membrane;molecular_function:GO:0005215//transporter activity;
isoform_1463		85	Sap-miR169a-3p	EHMT	[histone H3]-lysine9 N-trimethyltransferase EHMT	dzi:111305110/2.0e-42/histone-lysine N-methyltransferase, H3 lysine-9 specific SUVH6-like isoform X1; K11420 euchromatic histone-lysine N-methyltransferase [EC:2.1.1.43]	0.129	XP_022758092.1/1.5e-41/histone-lysine N-methyltransferase, H3 lysine-9 specific SUVH6-like isoform X2 [Durio zibethinus]	NA	sp|Q8VZ17|SUVH6_ARATH/2.5e-30/Histone-lysine N-methyltransferase, H3 lysine-9 specific SUVH6 OS=Arabidopsis thaliana OX=3702 GN=SUVH6 PE=1 SV=2	At2g22740_2/1.3e-21/[BK] KOG1082 Histone H3 (Lys9) methyltransferase SUV39H1/Clr4, required for transcriptional silencing	NA	cellular_component:GO:0005634//nucleus;GO:0005694//chromosome;molecular_function:GO:0008270//zinc ion binding;GO:0018024//histone-lysine N-methyltransferase activity;
isoform_146950		86	Sap-nmiR3	VPS13A_C	vacuolar protein sorting-associated protein 13A/C	dct:110098611/5.1e-13/uncharacterized protein LOC110098611; K19525 vacuolar protein sorting-associated protein 13A/C	0.064	XP_015075401.1/1.4e-48/uncharacterized protein LOC107019405 [Solanum pennellii]	NA	sp|P31843|RRPO_OENBE/1.3e-14/RNA-directed DNA polymerase homolog OS=Oenothera berteroana OX=3950 PE=4 SV=1	At2g04670/1.6e-36/[R] KOG0017 FOG: Transposon-encoded proteins with TYA, reverse transcriptase, integrase domains in various combinations	isoform_146950/0.7/Ponericin L family	biological_process:GO:0015074//DNA integration;cellular_component:GO:0005634//nucleus;molecular_function:GO:0003964//RNA-directed DNA polymerase activity;GO:0003676//nucleic acid binding;
isoform_152511		87	Sap-nmiR3	SAP18	histone deacetylase complex subunit SAP18	egr:104444296/3.3e-77/histone deacetylase complex subunit SAP18; K14324 histone deacetylase complex subunit SAP18	0.064	KCW72889.1/2.2e-77/hypothetical protein EUGRSUZ_E01334 [Eucalyptus grandis]	XM_007051922.2/0.0/XM_007051922.2 PREDICTED: Theobroma cacao histone deacetylase complex subunit SAP18 (LOC18614252), mRNA	sp|O64644|SAP18_ARATH/6.9e-57/Histone deacetylase complex subunit SAP18 OS=Arabidopsis thaliana OX=3702 GN=At2g45640 PE=1 SV=1	At2g45640/1.6e-56/[K] KOG3391 Transcriptional co-repressor component	isoform_152511/4.9e-41/Sin3 associated polypeptide p18 (SAP18)	NA
isoform_1532	basic metabolism adaption	88	Sap-miR168a-5p	ELF2C, AGO	eukaryotic translation initiation factor 2C	vvi:100256320/2.0e-148/protein argonaute 1; K11593 eukaryotic translation initiation factor 2C	0.129	XP_023880904.1/8.7e-148/protein argonaute 1 [Quercus suber]	XM_011049463.1/0.0/XM_011049463.1 PREDICTED: Populus euphratica protein argonaute 1-like (LOC105142023), transcript variant X2, mRNA >XM_011049464.1 PREDICTED: Populus euphratica protein argonaute 1-like (LOC105142023), transcript variant X3, mRNA	sp|Q7XSA2|AGO1B_ORYSJ/6.6e-137/Protein argonaute 1B OS=Oryza sativa subsp. japonica OX=39947 GN=AGO1B PE=2 SV=3	At1g48410/2.6e-133/[J] KOG1041 Translation initiation factor 2C (eIF-2C) and related proteins	isoform_1532/2.5e-29/PAZ domain	biological_process:GO:0031047//gene silencing by RNA;molecular_function:GO:0003676//nucleic acid binding;
isoform_154034	signaling transduction (hormone signaling)	89	Sap-nmiR22	EREBP	EREBP-like factor; transcription factor	egr:104419520/1.6e-97/LOW QUALITY PROTEIN: ethylene-responsive transcription factor RAP2-12; K09286 EREBP-like factor	0.064	ANB66207.1/9.4e-118/ethylene responsive factor [Punica granatum] >OWM68396.1 hypothetical protein CDL15_Pgr004878 [Punica granatum] >PKI50414.1 hypothetical protein CRG98_029164 [Punica granatum]	AF389242.1/0.0/AF389242.1 Berberidopsis corallina 26S ribosomal RNA gene, partial sequence	sp|Q9LUM4|RAP22_ARATH/1.8e-54/Ethylene-responsive transcription factor RAP2-2 OS=Arabidopsis thaliana OX=3702 GN=RAP2-2 PE=1 SV=2	At3g14230/1.6e-50/[K] LSE0301 A AP2 domain transcription factor	isoform_154034/3.8e-12/AP2 domain	cellular_component:GO:0005634//nucleus;molecular_function:GO:0003677//DNA binding;GO:0003700//DNA-binding transcription factor activity;
isoform_156810	signaling transduction (hormone signaling)	90	Sap-miR5368	AP2	AP2-like factor, euAP2 lineage; transcription factor	fve:101313055/3.9e-72/floral homeotic protein APETALA 2-like; K09284 AP2-like factor, euAP2 lineage	0.064	PKI33364.1/5.9e-109/hypothetical protein CRG98_046230 [Punica granatum]	BT143410.1/0.0/BT143410.1 Lotus japonicus clone JCVI-FLLj-21N13 unknown mRNA	sp|P47927|AP2_ARATH/4.9e-57/Floral homeotic protein APETALA 2 OS=Arabidopsis thaliana OX=3702 GN=AP2 PE=1 SV=1	At4g36920/1.1e-56/[K] LSE0337 A Ovule development protein/AP2 domain transcription factor	isoform_156810/8.2e-10/AP2 domain	cellular_component:GO:0005634//nucleus;molecular_function:GO:0003677//DNA binding;GO:0003700//DNA-binding transcription factor activity;
isoform_157932		91	Sap-nmiR23	RP-S11, MRPS11, rpsK	small subunit ribosomal protein S11; transcription factor	dct:110099696/2.2e-17/uncharacterized protein LOC110099696; K02948 small subunit ribosomal protein S11	0.064	PPR87032.1/5.7e-62/hypothetical protein GOBAR_AA33653 [Gossypium barbadense]	KY635883.1/0.0/KY635883.1 Punica granatum chloroplast, complete genome	NA	NA	NA	NA
isoform_1580	signaling transduction (hormone signaling)	92	Sap-miR166	HD-ZIP	homeobox-leucine zipper protein; transcription factor	egr:104449909/8.6e-232/homeobox-leucine zipper protein ATHB-15; K09338 homeobox-leucine zipper protein	0.193	OWM78111.1/5.7e-240/hypothetical protein CDL15_Pgr014930 [Punica granatum]	XM_010064216.2/0.0/XM_010064216.2 PREDICTED: Eucalyptus grandis homeobox-leucine zipper protein ATHB-15 (LOC104449909), mRNA	sp|Q9ZU11|ATB15_ARATH/8.9e-211/Homeobox-leucine zipper protein ATHB-15 OS=Arabidopsis thaliana OX=3702 GN=ATHB-15 PE=1 SV=1	At1g52150/2.0e-210/[K] LSE0187 A Homeodomain protein, contains START domain	isoform_1580/9.9e-54/START domain	cellular_component:GO:0005634//nucleus;molecular_function:GO:0008289//lipid binding;GO:0003677//DNA binding;
isoform_158609	detoxificants	93	Sap-nmiR6	GST, gst	glutathione S-transferase	egr:104456097/1.6e-86/glutathione transferase GST 23; K00799 glutathione S-transferase [EC:2.5.1.18]	0.064	OWM85766.1/2.7e-106/hypothetical protein CDL15_Pgr023699 [Punica granatum]	AF320905.1/0.0/AF320905.1 Citrus unshiu metallothionein-like protein (MT45) mRNA, complete cds	sp|Q9FQA3|GST23_MAIZE/1.7e-57/Glutathione transferase GST 23 OS=Zea mays OX=4577 PE=2 SV=1	At2g29420/4.4e-53/[O] KOG0406 Glutathione S-transferase	isoform_158609/2.3e-16/Glutathione S-transferase, N-terminal domain	biological_process:GO:0006749//glutathione metabolic process;cellular_component:GO:0005737//cytoplasm;molecular_function:GO:0004364//glutathione transferase activity;GO:0016740//transferase activity;
isoform_158926	morphological adaption	94	Sap-miR4995, Sap-nmiR19	ACAA1	acetyl-CoA acyltransferase 1	jre:108988454/3.4e-234/3-ketoacyl-CoA thiolase 2, peroxisomal; K07513 acetyl-CoA acyltransferase 1 [EC:2.3.1.16]	0.064	OWM86477.1/3.0e-239/hypothetical protein CDL15_Pgr026369 [Punica granatum]	XM_010070774.2/0.0/XM_010070774.2 PREDICTED: Eucalyptus grandis 3-ketoacyl-CoA thiolase 2, peroxisomal (LOC104456056), mRNA	sp|Q56WD9|THIK2_ARATH/1.7e-231/3-ketoacyl-CoA thiolase 2, peroxisomal OS=Arabidopsis thaliana OX=3702 GN=PED1 PE=1 SV=2	At2g33150/3.9e-231/[I] KOG1389 3-oxoacyl CoA thiolase	isoform_158926/1.4e-78/Thiolase, N-terminal domain	molecular_function:GO:0016747//transferase activity, transferring acyl groups other than amino-acyl groups;
isoform_1593	signaling transduction (hormone signaling)	95	Sap-miR166, Sap-miR166-3p, Sap-miR166a-3p	HD-ZIP	homeobox-leucine zipper protein; transcription factor	egr:104449909/5.3e-165/homeobox-leucine zipper protein ATHB-15; K09338 homeobox-leucine zipper protein	0.129	GAV77549.1/1.0e-196/Homeobox domain-containing protein/START domain-containing protein/MEKHLA domain-containing protein [Cephalotus follicularis]	KF472162.1/0.0/KF472162.1 Eucalyptus tereticornis HD-Zip class III transcription factor (HB2) mRNA, complete cds	sp|Q9ZU11|ATB15_ARATH/8.9e-150/Homeobox-leucine zipper protein ATHB-15 OS=Arabidopsis thaliana OX=3702 GN=ATHB-15 PE=1 SV=1	At1g52150/2.0e-149/[K] LSE0187 A Homeodomain protein, contains START domain	NA	cellular_component:GO:0005634//nucleus;molecular_function:GO:0008289//lipid binding;GO:0003677//DNA binding;
isoform_164683	signaling transduction (MAPK signaling, hormone signaling)	96	Sap-nmiR12	CHIB	basic endochitinase B	bvg:104883960/4.6e-13/Ch1, Chitinase; endochitinase; K20547 basic endochitinase B [EC:3.2.1.14]	0.064	OWM90261.1/1.5e-63/hypothetical protein CDL15_Pgr006582 [Punica granatum]	CP023131.1/0.0/CP023131.1 Lupinus angustiflorus cultivar Tanjil chromosome LG-19	sp|Q00451|PRF1_SOLLC/1.9e-52/36.4 kDa proline-rich protein OS=Solanum lycopersicum OX=4081 GN=TPRP-F1 PE=2 SV=1	At4g15160_1/2.2e-48/[R] LSE0121 A AAI domain	NA	NA
isoform_1647	signaling transduction (hormone signaling)	97	Sap-miR166, Sap-miR166a, Sap-miR166a-3p	HD-ZIP	homeobox-leucine zipper protein; transcription factor	egr:104449909/0.0e+00/homeobox-leucine zipper protein ATHB-15; K09338 homeobox-leucine zipper protein	0.129	OWM78111.1/0.0e+00/hypothetical protein CDL15_Pgr014930 [Punica granatum]	XM_010064216.2/0.0/XM_010064216.2 PREDICTED: Eucalyptus grandis homeobox-leucine zipper protein ATHB-15 (LOC104449909), mRNA	sp|Q9ZU11|ATB15_ARATH/0.0e+00/Homeobox-leucine zipper protein ATHB-15 OS=Arabidopsis thaliana OX=3702 GN=ATHB-15 PE=1 SV=1	At1g52150/0.0e+00/[K] LSE0187 A Homeodomain protein, contains START domain	isoform_1647/4e-53/START domain	cellular_component:GO:0005634//nucleus;molecular_function:GO:0008289//lipid binding;GO:0003677//DNA binding;
isoform_164763		98	Sap-miR164a	E1.16.1.7	ferric-chelate reductase	cpep:111802683/3.5e-30/ferric reduction oxidase 7, chloroplastic-like; K00521 ferric-chelate reductase [EC:1.16.1.7]	0.064	OWM88637.1/1.7e-65/hypothetical protein CDL15_Pgr002404 [Punica granatum] >PKI37663.1 hypothetical protein CRG98_041956 [Punica granatum]	XM_010066161.2/0.0/XM_010066161.2 PREDICTED: Eucalyptus grandis protein CUP-SHAPED COTYLEDON 2 (LOC104451522), mRNA	sp|O04017|NAC98_ARATH/5.3e-61/Protein CUP-SHAPED COTYLEDON 2 OS=Arabidopsis thaliana OX=3702 GN=NAC098 PE=1 SV=1	At5g53950/1.2e-60/[S] LSE0117 A No apical meristem (NAM) developmental protein and related proteins	isoform_164763/1.3e-22/No apical meristem (NAM) protein	biological_process:GO:0006355//regulation of transcription, DNA-templated;cellular_component:GO:0005634//nucleus;molecular_function:GO:0003677//DNA binding;
isoform_167580	signaling transduction (hormone signaling)	99	Sap-nmiR22	thiN, TPK1, THI80	thiamine pyrophosphokinase	vvi:100246863/1.6e-52/thiamine pyrophosphokinase 1; K00949 thiamine pyrophosphokinase [EC:2.7.6.2]	0.064	OWM77981.1/6.4e-58/hypothetical protein CDL15_Pgr018550 [Punica granatum]	AF479148.1/0.0/AF479148.1 Clarkia xantiana 26S ribosomal RNA gene, complete sequence	sp|Q0JMW0|TPK2_ORYSJ/4.5e-45/Thiamine pyrophosphokinase 2 OS=Oryza sativa subsp. japonica OX=39947 GN=TPK2 PE=2 SV=1	At2g44750/4.7e-42/[H] KOG3153 Thiamine pyrophosphokinase	isoform_167580/1e-17/Thiamin pyrophosphokinase, catalytic domain	biological_process:GO:0006772//thiamine metabolic process;GO:0009229//thiamine diphosphate biosynthetic process;molecular_function:GO:0030975//thiamine binding;GO:0004788//thiamine diphosphokinase activity;GO:0005524//ATP binding;GO:0016301//kinase activity;
isoform_167840	morphological adaption, signaling transduction (hormone signaling)	100	Sap-miR160a-5p	K14486, ARF	auxin response factor; transcription factor	pop:18103082/6.9e-27/auxin response factor 3 isoform X1; K14486 auxin response factor	0.064	PKI51963.1/1.5e-89/hypothetical protein CRG98_027615 [Punica granatum]	XM_002437428.2/0.0/XM_002437428.2 PREDICTED: Sorghum bicolor auxin response factor 18 (LOC8064947), mRNA	sp|Q9SKN5|ARFJ_ARATH/5.8e-64/Auxin response factor 10 OS=Arabidopsis thaliana OX=3702 GN=ARF10 PE=2 SV=1	At2g28350/1.3e-63/[TK] LSE0284 A Auxin response transcription factor	isoform_167840/1.9e-08/Auxin response factor	biological_process:GO:0006355//regulation of transcription, DNA-templated;GO:0009734//auxin-activated signaling pathway;cellular_component:GO:0005634//nucleus;molecular_function:GO:0003677//DNA binding;
isoform_168625		101	Sap-miR319	CHS	chalcone synthase	thj:104801109/1.5e-07/chalcone synthase-like; K00660 chalcone synthase [EC:2.3.1.74]	0.064	XP_010522515.1/1.1e-06/PREDICTED: chalcone synthase-like [Tarenaya hassleriana]	XM_020241421.1/0.0/XM_020241421.1 PREDICTED: Ananas comosus putative disease resistance RPP13-like protein 1 (LOC109716107), transcript variant X2, mRNA	sp|O04111|CHSY_PERFR/3.3e-08/Chalcone synthase OS=Perilla frutescens OX=48386 GN=CHS PE=2 SV=1	At5g13930/2.4e-06/[Q] LSE0252 A Chalcone synthase	NA	NA
isoform_17049	ion homeostasis, basic metabolism adaption	102	Sap-miR396a-3p_2	USP7, UBP15	ubiquitin carboxyl-terminal hydrolase 7	egr:104425548/1.9e-42/ubiquitin carboxyl-terminal hydrolase 12 isoform X2; K11838 ubiquitin carboxyl-terminal hydrolase 7 [EC:3.4.19.12]	0.193	OWM79006.1/9.5e-91/hypothetical protein CDL15_Pgr003177 [Punica granatum]	NA	sp|Q84WU2|UBP13_ARATH/1.8e-22/Ubiquitin carboxyl-terminal hydrolase 13 OS=Arabidopsis thaliana OX=3702 GN=UBP13 PE=1 SV=1	At3g11910/4.1e-22/[O] KOG1863 Ubiquitin carboxyl-terminal hydrolase	isoform_17049/8.7e-05/MATH domain	NA
isoform_171913		103	Sap-miR169a-3p	PPP2R2	serine/threonine-protein phosphatase 2A regulatory subunit B	zma:100383125/1.2e-25/IDP301; uncharacterized protein LOC100383125; K04354 serine/threonine-protein phosphatase 2A regulatory subunit B	0.064	XP_023910849.1/3.2e-51/protein phosphatase PP2A regulatory subunit B-like [Quercus suber]	NA	sp|A2X2K3|2ABB_ORYSI/2.1e-23/Serine/threonine protein phosphatase 2A 55 kDa regulatory subunit B beta isoform OS=Oryza sativa subsp. indica OX=39946 GN=OsI_006296 PE=2 SV=2	SPAC227.07c/1.9e-32/[T] KOG1354 Serine/threonine protein phosphatase 2A, regulatory subunit	isoform_171913/0.065/Viral capsid protein 91 N-terminal	cellular_component:GO:0000159//protein phosphatase type 2A complex;molecular_function:GO:0019888//protein phosphatase regulator activity;
isoform_172073	signaling transduction (hormone signaling)	104	Sap-miR166a, Sap-miR166c	HD-ZIP	homeobox-leucine zipper protein; transcription factor	jcu:105636855/0.0e+00/homeobox-leucine zipper protein ATHB-14; K09338 homeobox-leucine zipper protein	0.064	PKI66297.1/0.0e+00/hypothetical protein CRG98_013323 [Punica granatum]	KJ451560.1/0.0/KJ451560.1 Betula luminifera class III HD-Zip protein HDZ1 (HDZ1) mRNA, complete cds	sp|Q6AST1|HOX32_ORYSJ/1.6e-283/Homeobox-leucine zipper protein HOX32 OS=Oryza sativa subsp. japonica OX=39947 GN=HOX32 PE=2 SV=1	At2g34710/3.9e-277/[K] LSE0187 A Homeodomain protein, contains START domain	isoform_172073/2.1e-47/MEKHLA domain	cellular_component:GO:0005634//nucleus;molecular_function:GO:0008289//lipid binding;GO:0003677//DNA binding;
isoform_172261		105	Sap-miR4995	PDC, pdc	pyruvate decarboxylase	vra:106774984/3.3e-23/pyruvate decarboxylase 1-like; K01568 pyruvate decarboxylase [EC:4.1.1.1]	0.064	PKI47192.1/1.9e-51/hypothetical protein CRG98_032414 [Punica granatum]	MF362689.1/0.0/MF362689.1 Ambrosia artemisiifolia chloroplast, complete genome	sp|Q9FPQ6|GP1_CHLRE/5.7e-13/Vegetative cell wall protein gp1 OS=Chlamydomonas reinhardtii OX=3055 GN=GP1 PE=1 SV=1	At4g18670/2.2e-12/[M] LSE0601 A Pollen extensin-like protein (Pex)	NA	NA
isoform_172837	ion homeostasis, basic metabolism adaption	106	Sap-miR396a-3p_2	USP7, UBP15	ubiquitin carboxyl-terminal hydrolase 7	egr:104425548/2.5e-101/ubiquitin carboxyl-terminal hydrolase 12 isoform X2; K11838 ubiquitin carboxyl-terminal hydrolase 7 [EC:3.4.19.12]	0.064	OWM79006.1/1.2e-165/hypothetical protein CDL15_Pgr003177 [Punica granatum]	XM_022037503.1/0.0/XM_022037503.1 PREDICTED: Carica papaya AAA-ATPase At5g57480-like (LOC110811119), mRNA	sp|Q9FPT1|UBP12_ARATH/1.9e-38/Ubiquitin carboxyl-terminal hydrolase 12 OS=Arabidopsis thaliana OX=3702 GN=UBP12 PE=1 SV=2	At5g06600/4.3e-38/[O] KOG1863 Ubiquitin carboxyl-terminal hydrolase	isoform_172837/1.7e-20/MATH domain	NA
isoform_17312	protein turnover	107	Sap-miR394a_1, Sap-miR394a_2	ABCE1, Rli1	ATP-binding cassette, sub-family E, member 1	bna:106375065/2.0e-06/F-box/kelch-repeat protein At3g13680-like; K06174 ATP-binding cassette, sub-family E, member 1	6.247	OWM76213.1/2.8e-219/hypothetical protein CDL15_Pgr009859 [Punica granatum] >PKI76994.1 hypothetical protein CRG98_002497 [Punica granatum]	XM_021777589.1/0.0/XM_021777589.1 PREDICTED: Manihot esculenta F-box only protein 6-like (LOC110630218), transcript variant X2, mRNA	sp|Q9FZK1|FBX6_ARATH/1.6e-155/F-box only protein 6 OS=Arabidopsis thaliana OX=3702 GN=FBX6 PE=2 SV=1	At1g27340/3.6e-155/[R] LSE0005 A F-box domain	isoform_17312/6.7e-06/F-box domain	NA
isoform_175269		108	Sap-nmiR3	ASAH2	neutral ceramidase	mesc:110609247/4.2e-68/neutral ceramidase 1-like isoform X1; K12349 neutral ceramidase [EC:3.5.1.23]	0.064	XP_021604385.1/3.1e-67/neutral ceramidase 1-like isoform X1 [Manihot esculenta] >OAY57776.1 hypothetical protein MANES_02G123100 [Manihot esculenta]	XM_021792030.1/0.0/XM_021792030.1 PREDICTED: Hevea brasiliensis neutral ceramidase 1-like (LOC110640649), mRNA	sp|F4KHQ8|NCER3_ARATH/5.7e-39/Neutral ceramidase 3 OS=Arabidopsis thaliana OX=3702 GN=NCER3 PE=2 SV=1	At5g58980/1.3e-38/[T] KOG2232 Ceramidases	isoform_175269/0.018/Neutral/alkaline non-lysosomal ceramidase, N-terminal	biological_process:GO:0046514//ceramide catabolic process;GO:0046512//sphingosine biosynthetic process;GO:0042759//long-chain fatty acid biosynthetic process;cellular_component:GO:0005576//extracellular region;molecular_function:GO:0017040//N-acylsphingosine amidohydrolase activity;
isoform_178520	signaling transduction (hormone signaling)	109	Sap-nmiR8	BIN2	protein brassinosteroid insensitive 2	pda:103707356/9.7e-58/shaggy-related protein kinase eta-like; K14502 protein brassinosteroid insensitive 2 [EC:2.7.11.1]	0.064	XP_023886086.1/3.7e-231/alkaline protease 2-like [Quercus suber]	XM_010658759.2/0.0/XM_010658759.2 PREDICTED: Vitis vinifera shaggy-related protein kinase eta (LOC100248790), mRNA	sp|Q39019|KSG10_ARATH/6.1e-42/Shaggy-related protein kinase kappa OS=Arabidopsis thaliana OX=3702 GN=ASK10 PE=2 SV=2	YEL060c/2.8e-127/[O] KOG1153 Subtilisin-related protease/Vacuolar protease B	isoform_178520/4.7e-36/Subtilase family	cellular_component:GO:0016021//integral component of membrane;
isoform_178997	morphological adaption, signaling transduction (hormone signaling)	110	Sap-miR160a-5p	K14486, ARF	auxin response factor; transcription factor	atr:18442277/6.0e-08/ETT; auxin response factor 3; K14486 auxin response factor	0.064	PKI51963.1/2.8e-94/hypothetical protein CRG98_027615 [Punica granatum]	XM_009398698.2/0.0/XM_009398698.2 PREDICTED: Musa acuminata subsp. malaccensis auxin response factor 18-like (LOC103981930), mRNA	sp|Q653H7|ARFR_ORYSJ/1.3e-37/Auxin response factor 18 OS=Oryza sativa subsp. japonica OX=39947 GN=ARF18 PE=2 SV=1	At2g28350/2.0e-33/[TK] LSE0284 A Auxin response transcription factor	NA	biological_process:GO:0006355//regulation of transcription, DNA-templated;GO:0009734//auxin-activated signaling pathway;cellular_component:GO:0005634//nucleus;molecular_function:GO:0003677//DNA binding;
isoform_182721		111	Sap-miR530a	CRG98	hypothetical protein	NA	0.064	PKI52378.1/2.7e-137/hypothetical protein CRG98_027304 [Punica granatum]	XM_017782626.1/0.0/XM_017782626.1 PREDICTED: Gossypium arboreum uncharacterized LOC108479818 (LOC108479818), mRNA	NA	NA	NA	NA
isoform_182767	detoxificants	112	Sap-nmiR6	ALDH	aldehyde dehydrogenase (NAD+)	egr:104418507/1.4e-280/aldehyde dehydrogenase family 2 member B4, mitochondrial; K00128 aldehyde dehydrogenase (NAD+) [EC:1.2.1.3]	0.064	XP_010028184.1/1.0e-279/PREDICTED: aldehyde dehydrogenase family 2 member B4, mitochondrial [Eucalyptus grandis] >KCW83434.1 hypothetical protein EUGRSUZ_B00357 [Eucalyptus grandis]	XM_010029882.2/0.0/XM_010029882.2 PREDICTED: Eucalyptus grandis aldehyde dehydrogenase family 2 member B4, mitochondrial (LOC104418507), mRNA	sp|Q9SU63|AL2B4_ARATH/4.5e-253/Aldehyde dehydrogenase family 2 member B4, mitochondrial OS=Arabidopsis thaliana OX=3702 GN=ALDH2B4 PE=1 SV=1	At3g48000/1.0e-252/[C] KOG2450 Aldehyde dehydrogenase	isoform_182767/7.2e-180/Aldehyde dehydrogenase family	molecular_function:GO:0016620//oxidoreductase activity, acting on the aldehyde or oxo group of donors, NAD or NADP as acceptor;GO:0043878//glyceraldehyde-3-phosphate dehydrogenase (NAD+) (non-phosphorylating) activity;GO:0004842//ubiquitin-protein transferase activity;GO:0004029//aldehyde dehydrogenase (NAD) activity;
isoform_185613	signaling transduction (hormone signaling)	113	Sap-nmiR12	SNF1	carbon catabolite-derepressing protein kinase	jre:108989474/1.0e-143/CBL-interacting serine/threonine-protein kinase 7-like; K12761 carbon catabolite-derepressing protein kinase [EC:2.7.11.1]	0.064	OWM87838.1/2.0e-204/hypothetical protein CDL15_Pgr019422 [Punica granatum] >PKI51107.1 hypothetical protein CRG98_028487 [Punica granatum]	XM_010055220.1/0.0/XM_010055220.1 PREDICTED: Eucalyptus grandis GTP-binding protein YPTM2 (LOC104441953), mRNA	sp|Q9SUL7|CIPK4_ARATH/7.2e-127/CBL-interacting serine/threonine-protein kinase 4 OS=Arabidopsis thaliana OX=3702 GN=CIPK4 PE=1 SV=1	At4g14580/1.7e-126/[T] KOG0583 Serine/threonine protein kinase	isoform_185613/1.9e-67/Protein kinase domain	biological_process:GO:0007165//signal transduction;molecular_function:GO:0004674//protein serine/threonine kinase activity;GO:0005524//ATP binding;
isoform_185944	protein turnover	114	Sap-miR169b-5p, Sap-miR169e, Sap-miR169v	HSP90A, htpG	molecular chaperone HtpG	dzi:111298350/1.3e-08/heat shock protein 82-like; K04079 molecular chaperone HtpG	0.064	OWM79021.1/5.8e-111/hypothetical protein CDL15_Pgr003192 [Punica granatum] >PKI42959.1 hypothetical protein CRG98_036757 [Punica granatum]	XM_016090829.2/0.0/XM_016090829.2 PREDICTED: Arachis duranensis uncharacterized LOC107471371 (LOC107471371), transcript variant X2, mRNA	NA	NA	isoform_185944/1.3e-11/N-terminal C2 in EEIG1 and EHBP1 proteins	NA
isoform_186025	morphological adaption, signaling transduction (hormone signaling)	115	Sap-miR160a-5p, Sap-miR160h_1	K14486, ARF	auxin response factor; transcription factor	mtr:MTR_2g005240/3.7e-72/auxin response factor 2; K14486 auxin response factor	0.064	PKI68138.1/0.0e+00/hypothetical protein CRG98_011437 [Punica granatum]	XM_010266365.2/0.0/XM_010266365.2 PREDICTED: Nelumbo nucifera auxin response factor 18-like (LOC104602613), mRNA	sp|Q653H7|ARFR_ORYSJ/3.1e-226/Auxin response factor 18 OS=Oryza sativa subsp. japonica OX=39947 GN=ARF18 PE=2 SV=1	At2g28350/1.5e-210/[TK] LSE0284 A Auxin response transcription factor	isoform_186025/1.5e-31/Auxin response factor	biological_process:GO:0006355//regulation of transcription, DNA-templated;GO:0009734//auxin-activated signaling pathway;cellular_component:GO:0005634//nucleus;molecular_function:GO:0003677//DNA binding;
isoform_18838		116	Sap-miR166d-5p	K22395	cinnamyl-alcohol dehydrogenase	cit:102618663/1.4e-223/berberine bridge enzyme-like 13; K22395 cinnamyl-alcohol dehydrogenase [EC:1.1.1.195]	0.451	OWM63771.1/8.4e-249/hypothetical protein CDL15_Pgr006033 [Punica granatum]	XM_017579556.1/0.0/XM_017579556.1 PREDICTED: Vigna angularis flavin-dependent oxidoreductase FOX2-like (LOC108341889), mRNA	sp|O64743|BBE15_ARATH/1.5e-207/Berberine bridge enzyme-like 15 OS=Arabidopsis thaliana OX=3702 GN=MEE23 PE=1 SV=1	At2g34790/3.5e-207/[QG] LSE0347 A Predicted berberine bridge enzyme/FAD-binding oxidoreductase	isoform_18838/7.9e-29/FAD binding domain	molecular_function:GO:0016491//oxidoreductase activity;GO:0071949//FAD binding;
isoform_191487	basic metabolism adaption	117	Sap-miR168a-5p	ELF2C, AGO	eukaryotic translation initiation factor 2C	egr:104425865/8.4e-151/protein argonaute 1; K11593 eukaryotic translation initiation factor 2C	0.064	OWM82968.1/5.0e-152/hypothetical protein CDL15_Pgr005368 [Punica granatum]	NA	sp|O04379|AGO1_ARATH/1.3e-136/Protein argonaute 1 OS=Arabidopsis thaliana OX=3702 GN=AGO1 PE=1 SV=1	At1g48410/2.9e-136/[J] KOG1041 Translation initiation factor 2C (eIF-2C) and related proteins	isoform_191487/1.3e-33/N-terminal domain of argonaute	biological_process:GO:0031047//gene silencing by RNA;molecular_function:GO:0003676//nucleic acid binding;
isoform_192086	detoxificants	118	Sap-miR4995, Sap-nmiR18	Cu/Zn-SOD, CSD	Copper/zinc superoxide dismutase	rcu:8272471/5.9e-114/copper chaperone for superoxide dismutase, chloroplastic/cytosolic; K04569 copper chaperone for superoxide dismutase	0.064	OWM71939.1/1.4e-124/hypothetical protein CDL15_Pgr017822 [Punica granatum]	MF362689.1/0.0/MF362689.1 Ambrosia artemisiifolia chloroplast, complete genome	sp|Q9LD47|CCS_ARATH/2.3e-100/Copper chaperone for superoxide dismutase, chloroplastic/cytosolic OS=Arabidopsis thaliana OX=3702 GN=CCS PE=1 SV=1	At1g12520/5.3e-100/[P] KOG4656 Copper chaperone for superoxide dismutase	isoform_192086/1.5e-16/Copper/zinc superoxide dismutase (SODC)	biological_process:GO:0006801//superoxide metabolic process;GO:0030001//metal ion transport;molecular_function:GO:0046872//metal ion binding;
isoform_192238	morphological adaption, signaling transduction (hormone signaling)	119	Sap-miR160a-5p	K14486, ARF	auxin response factor; transcription factor	ini:109165771/2.0e-33/auxin response factor 3-like; K14486 auxin response factor	0.064	PKI51963.1/1.8e-83/hypothetical protein CRG98_027615 [Punica granatum]	XM_009398698.2/0.0/XM_009398698.2 PREDICTED: Musa acuminata subsp. malaccensis auxin response factor 18-like (LOC103981930), mRNA	sp|Q653H7|ARFR_ORYSJ/9.9e-63/Auxin response factor 18 OS=Oryza sativa subsp. japonica OX=39947 GN=ARF18 PE=2 SV=1	At2g28350/4.0e-59/[TK] LSE0284 A Auxin response transcription factor	isoform_192238/6.3e-19/Auxin response factor	biological_process:GO:0006355//regulation of transcription, DNA-templated;GO:0009734//auxin-activated signaling pathway;cellular_component:GO:0005634//nucleus;molecular_function:GO:0003677//DNA binding;
isoform_192316	basic metabolism adaption	120	Sap-nmiR12	H2A	histone H2A	mcha:111012850/5.7e-64/probable histone H2A.1; K11251 histone H2A	0.064	OWM72346.1/7.1e-79/hypothetical protein CDL15_Pgr018231 [Punica granatum]	XM_010062141.2/0.0/XM_010062141.2 PREDICTED: Eucalyptus grandis probable histone H2A.1 (LOC104448356), mRNA	sp|Q9ZVQ6|P2B10_ARATH/1.9e-65/F-box protein PP2-B10 OS=Arabidopsis thaliana OX=3702 GN=PP2B10 PE=1 SV=1	At2g02360/4.3e-65/[W] LSE0494 A Phloem lectin	isoform_192316/7.1e-51/Phloem protein 2	NA
isoform_1924	signaling transduction (hormone signaling)	121	Sap-miR166, Sap-miR166a, Sap-miR166c	HD-ZIP	homeobox-leucine zipper protein; transcription factor	egr:104449909/0.0e+00/homeobox-leucine zipper protein ATHB-15; K09338 homeobox-leucine zipper protein	0.773	OWM78111.1/0.0e+00/hypothetical protein CDL15_Pgr014930 [Punica granatum]	XM_010064216.2/0.0/XM_010064216.2 PREDICTED: Eucalyptus grandis homeobox-leucine zipper protein ATHB-15 (LOC104449909), mRNA	sp|Q9ZU11|ATB15_ARATH/0.0e+00/Homeobox-leucine zipper protein ATHB-15 OS=Arabidopsis thaliana OX=3702 GN=ATHB-15 PE=1 SV=1	At1g52150/0.0e+00/[K] LSE0187 A Homeodomain protein, contains START domain	isoform_1924/4e-53/START domain	cellular_component:GO:0005634//nucleus;molecular_function:GO:0008289//lipid binding;GO:0003677//DNA binding;
isoform_193146	signaling transduction (lipid signaling)	122	Sap-nmiR16	SFH5	phosphatidylinositol transfer protein SFH5	jre:109012759/9.0e-95/patellin-3-like; K19996 phosphatidylinositol transfer protein SFH5	0.064	OWM65723.1/5.7e-114/hypothetical protein CDL15_Pgr015147 [Punica granatum]	XM_021970445.1/0.0/XM_021970445.1 PREDICTED: Prunus avium patellin-3-like (LOC110767023), mRNA	sp|Q56Z59|PATL3_ARATH/3.0e-72/Patellin-3 OS=Arabidopsis thaliana OX=3702 GN=PATL3 PE=1 SV=2	At1g72160/6.9e-72/[I] KOG1471 Phosphatidylinositol transfer protein SEC14 and related proteins	isoform_193146/1.7e-12/CRAL/TRIO domain	NA
isoform_193723	signaling transduction (MAPK signaling)	123	Sap-nmiR22	EIN2	ethylene-insensitive protein 2	egr:104425071/2.4e-161/ethylene-insensitive protein 2; K14513 ethylene-insensitive protein 2	0.064	OWM69708.1/3.2e-210/hypothetical protein CDL15_Pgr025557 [Punica granatum]	GQ983587.1/0.0/GQ983587.1 Lonicera japonica 26S ribosomal RNA gene, partial sequence	sp|Q9S814|EIN2_ARATH/9.3e-135/Ethylene-insensitive protein 2 OS=Arabidopsis thaliana OX=3702 GN=EIN2 PE=1 SV=1	At5g03280/2.1e-134/[P] KOG1291 Mn2+ and Fe2+ transporters of the NRAMP family	NA	biological_process:GO:0009873//ethylene-activated signaling pathway;cellular_component:GO:0016021//integral component of membrane;molecular_function:GO:0046873//metal ion transmembrane transporter activity;
isoform_197182	detoxificants	124	Sap-miR4995	trxA	thioredoxin 1	hbr:110655226/2.0e-18/thioredoxin H-type-like; K03671 thioredoxin 1	0.064	KJB09728.1/2.3e-18/hypothetical protein B456_001G160400 [Gossypium raimondii]	MF362689.1/0.0/MF362689.1 Ambrosia artemisiifolia chloroplast, complete genome	sp|P29449|TRXH1_TOBAC/2.4e-17/Thioredoxin H-type 1 OS=Nicotiana tabacum OX=4097 PE=2 SV=1	At3g51030/9.4e-17/[O] KOG0907 Thioredoxin	NA	biological_process:GO:0006662//glycerol ether metabolic process;GO:0045454//cell redox homeostasis;cellular_component:GO:0005623//cell;molecular_function:GO:0015035//protein disulfide oxidoreductase activity;
isoform_197497	signaling transduction (hormone signaling)	125	Sap-nmiR16	KIN	DNA/RNA-binding protein KIN17	jcu:105628998/2.0e-61/KIN17-like protein; K13102 DNA/RNA-binding protein KIN17	0.064	PKI72384.1/2.6e-73/hypothetical protein CRG98_007254 [Punica granatum]	XM_020839119.1/0.0/XM_020839119.1 PREDICTED: Dendrobium catenatum KIN17-like protein (LOC110108463), transcript variant X5, mRNA	sp|Q9ZVU5|KIN17_ARATH/4.5e-59/KIN17-like protein OS=Arabidopsis thaliana OX=3702 GN=KIN17 PE=1 SV=1	At1g55460/1.0e-58/[A] KOG2837 Protein containing a U1-type Zn-finger and implicated in RNA splicing or processing	isoform_197497/0.0031/KOW motif	NA
isoform_199458	signaling transduction (MAPK signaling)	126	Sap-nmiR6	FLS2	LRR receptor-like serine/threonine-protein kinase FLS2	cann:107859916/8.2e-57/DNA-damage-repair/toleration protein DRT100-like; K13420 LRR receptor-like serine/threonine-protein kinase FLS2 [EC:2.7.11.1]	0.064	OWM62913.1/5.8e-176/hypothetical protein CDL15_Pgr020207 [Punica granatum] >PKI47315.1 hypothetical protein CRG98_032290 [Punica granatum]	XM_010061738.2/0.0/XM_010061738.2 PREDICTED: Eucalyptus grandis 40S ribosomal protein S6-2 (LOC104447981), mRNA	sp|Q9SRL7|RLP35_ARATH/1.2e-42/Receptor-like protein 35 OS=Arabidopsis thaliana OX=3702 GN=RLP35 PE=3 SV=1	At1g33590/1.8e-142/[R] KOG0619 FOG: Leucine rich repeat	isoform_199458/8.6e-59/Ribosomal protein S6e	NA
isoform_20028		127	Sap-miR166d-5p	K22395	cinnamyl-alcohol dehydrogenase	cit:102618663/1.4e-223/berberine bridge enzyme-like 13; K22395 cinnamyl-alcohol dehydrogenase [EC:1.1.1.195]	0.386	OWM63771.1/8.2e-249/hypothetical protein CDL15_Pgr006033 [Punica granatum]	XM_017579556.1/0.0/XM_017579556.1 PREDICTED: Vigna angularis flavin-dependent oxidoreductase FOX2-like (LOC108341889), mRNA	sp|O64743|BBE15_ARATH/1.5e-207/Berberine bridge enzyme-like 15 OS=Arabidopsis thaliana OX=3702 GN=MEE23 PE=1 SV=1	At2g34790/3.4e-207/[QG] LSE0347 A Predicted berberine bridge enzyme/FAD-binding oxidoreductase	isoform_20028/7.9e-29/FAD binding domain	molecular_function:GO:0016491//oxidoreductase activity;GO:0071949//FAD binding;
isoform_200892	signaling transduction (hormone signaling)	128	Sap-nmiR6	plc	phospholipase C	zju:107410821/1.7e-165/non-specific phospholipase C1; K01114 phospholipase C [EC:3.1.4.3]	0.064	PKI31866.1/2.1e-175/hypothetical protein CRG98_047752 [Punica granatum]	XM_004294199.2/0.0/XM_004294199.2 PREDICTED: Fragaria vesca subsp. vesca non-specific phospholipase C1 (LOC101291608), mRNA	sp|Q8L7Y9|NPC1_ARATH/6.4e-158/Non-specific phospholipase C1 OS=Arabidopsis thaliana OX=3702 GN=NPC1 PE=2 SV=1	At1g07230/1.2e-156/[T] LSE1284 A Phospholipase C	isoform_200892/4.2e-84/Phosphoesterase family	molecular_function:GO:0016788//hydrolase activity, acting on ester bonds;
isoform_207117	ion homeostasis	129	Sap-miR396a-5p	ABCB1, CD243	ATP-binding cassette, subfamily B (MDR/TAP), member 1	dzi:111274727/2.6e-08/uncharacterized protein LOC111274727 isoform X1; K05658 ATP-binding cassette, subfamily B (MDR/TAP), member 1 [EC:7.6.2.2]	0.064	PKI37610.1/2.9e-168/hypothetical protein CRG98_041903 [Punica granatum]	XM_021751691.1/0.0/XM_021751691.1 PREDICTED: Manihot esculenta uncharacterized LOC110611393 (LOC110611393), mRNA	sp|O80386|CIP7_ARATH/1.9e-60/COP1-interacting protein 7 OS=Arabidopsis thaliana OX=3702 GN=CIP7 PE=1 SV=1	At4g27430/4.3e-60/[T] LSE0598 A COP1-interacting protein	isoform_207117/0.16/Putative nucleotidyltransferase DUF294	NA
isoform_207571		130	Sap-miR8620	MYF6, MRF4	myogenic factor 6	vvi:100259155/1.7e-64/transcription factor bHLH96; K18485 myogenic factor 6	0.064	OWM65653.1/5.1e-110/hypothetical protein CDL15_Pgr017150 [Punica granatum] >PKI46772.1 hypothetical protein CRG98_032844 [Punica granatum]	XM_010928040.2/0.0/XM_010928040.2 PREDICTED: Elaeis guineensis transcription factor bHLH94-like (LOC105048652), mRNA	sp|Q9C7T4|BH096_ARATH/1.1e-58/Transcription factor bHLH96 OS=Arabidopsis thaliana OX=3702 GN=BHLH96 PE=1 SV=1	At1g72210/2.6e-58/[KT] LSE0107 A bHLH transcription factor	isoform_207571/5.7e-11/Helix-loop-helix DNA-binding domain	molecular_function:GO:0046983//protein dimerization activity;
isoform_207899		131	Sap-miR164b	NA	NA	NA	0.064	NA	NA	NA	NA	NA	NA
isoform_212221		132	Sap-miR396b-3p	BODYGUARD 4	lysophospholipase BODYGUARD 4	NA	0.064	XP_007204508.1/9.7e-121/probable lysophospholipase BODYGUARD 4 [Prunus persica] >ONH94453.1 hypothetical protein PRUPE_7G017500 [Prunus persica]	NA	sp|Q700D5|BDG4_ARATH/4.3e-86/Probable lysophospholipase BODYGUARD 4 OS=Arabidopsis thaliana OX=3702 GN=BDG4 PE=2 SV=1	At5g17780/6.4e-85/[R] KOG1454 Predicted hydrolase/acyltransferase (alpha/beta hydrolase superfamily)	isoform_212221/3.1e-13/alpha/beta hydrolase fold	cellular_component:GO:0016021//integral component of membrane;
isoform_213811		133	Sap-miR169a-3p	CDC15	cell division control protein CDC15	gsl:Gasu_53970/2.3e-39/serine/threonine protein kinase; K06683 cell division control protein CDC15 [EC:2.7.11.1]	0.064	XP_021292552.1/1.2e-129/MAP3K epsilon protein kinase 1-like [Herrania umbratica]	XM_018864128.1/0.0/XM_018864128.1 PREDICTED: Eucalyptus grandis MAP3K epsilon protein kinase 1-like (LOC104421592), mRNA	sp|Q9LJD8|M3KE1_ARATH/1.6e-123/MAP3K epsilon protein kinase 1 OS=Arabidopsis thaliana OX=3702 GN=M3KE1 PE=1 SV=1	At3g13530/3.6e-123/[T] KOG0198 MEKK and related serine/threonine protein kinases	isoform_213811/4.8e-24/Protein kinase domain	molecular_function:GO:0005524//ATP binding;GO:0004672//protein kinase activity;
isoform_213907	signaling transduction (lipid signaling)	134	Sap-miR5368	iolG	myo-inositol 2-dehydrogenase / D-chiro-inositol 1-dehydrogenase	gsl:Gasu_60680/8.0e-06/myo-inositol 2-dehydrogenase; K00010 myo-inositol 2-dehydrogenase / D-chiro-inositol 1-dehydrogenase [EC:1.1.1.18 1.1.1.369]	0.064	OWM84630.1/1.0e-97/hypothetical protein CDL15_Pgr027417 [Punica granatum] >PKI69963.1 hypothetical protein CRG98_009838 [Punica granatum]	NA	sp|Q9SZ83|Y4967_ARATH/1.2e-71/Uncharacterized oxidoreductase At4g09670 OS=Arabidopsis thaliana OX=3702 GN=At4g09670 PE=1 SV=1	At4g09670/2.7e-71/[GQ] KOG2741 Dimeric dihydrodiol dehydrogenase	NA	molecular_function:GO:0016491//oxidoreductase activity;
isoform_214491	basic metabolism adaption	135	Sap-nmiR1, Sap-nmiR18	FDA3, FDA7, FDA8, desB	acyl-lipid omega-3 desaturase	cpep:111787876/4.1e-06/omega-3 fatty acid desaturase, endoplasmic reticulum-like isoform X1; K10257 acyl-lipid omega-3 desaturase [EC:1.14.19.25 1.14.19.35 1.14.19.36]	0.064	ACU17202.1/2.0e-17/unknown, partial [Glycine max]	AY189088.1/0.0/AY189088.1 Motherwellia haplosciadea 26S large subunit ribosomal RNA gene, partial sequence	NA	At3g58900/1.5e-06/[R] LSE0003 A F-box and FBD-domains	NA	cellular_component:GO:0016021//integral component of membrane;
isoform_214589	ion homeostasis	136	Sap-nmiR1	ATPF1E, atpC	F-type H+-transporting ATPase subunit epsilon	gab:11540295/1.2e-62/atpE, GoarCp027; ATP synthase CF1 epsilon subunit; K02114 F-type H+-transporting ATPase subunit epsilon	0.064	OTF84501.1/6.9e-67/putative ATP synthase subunit beta protein [Helianthus annuus]	KY635883.1/0.0/KY635883.1 Punica granatum chloroplast, complete genome	sp|Q2L911|ATPE_GOSHI/4.0e-64/ATP synthase epsilon chain, chloroplastic OS=Gossypium hirsutum OX=3635 GN=atpE PE=3 SV=1	AtCh029/4.7e-60/[C] KOG1758 Mitochondrial F1F0-ATP synthase, subunit delta/ATP16	isoform_214589/3.8e-25/ATP synthase, Delta/Epsilon chain, beta-sandwich domain	biological_process:GO:0015986//ATP synthesis coupled proton transport;cellular_component:GO:0045261//proton-transporting ATP synthase complex, catalytic core F(1);GO:0009535//chloroplast thylakoid membrane;GO:0016021//integral component of membrane;molecular_function:GO:0005524//ATP binding;GO:0051539//4 iron, 4 sulfur cluster binding;GO:0048038//quinone binding;GO:0008137//NADH dehydrogenase (ub…
isoform_214947		137	Sap-nmiR6	COL7A	collagen type VII alpha	han:110893561/3.2e-10/collagen alpha-1(I) chain-like; K16628 collagen, type VII, alpha	0.064	OWM63683.1/9.6e-56/hypothetical protein CDL15_Pgr008226 [Punica granatum]	AF479244.1/0.0/AF479244.1 Magnolia denudata 26S ribosomal RNA gene, complete sequence	sp|Q9FRV0|CHIC_SECCE/7.0e-08/Basic endochitinase C OS=Secale cereale OX=4550 GN=rscc PE=1 SV=1	At5g64430/1.3e-33/[R] LSE0156 A PB1 domain	isoform_214947/4.2e-05/PB1 domain	NA
isoform_215342		138	Sap-miR396a-3p_2	NA	NA	NA	0.064	NA	NA	NA	NA	NA	NA
isoform_218033		139	Sap-miR396a-3p_4, Sap-miR396b-3p	RBBP4, HAT2, CAF1, MIS16	histone-binding protein RBBP4	ini:109192616/6.8e-39/WD-40 repeat-containing protein MSI4-like; K10752 histone-binding protein RBBP4	0.064	PSR96912.1/3.4e-39/WD-40 repeat-containing protein [Actinidia chinensis var. chinensis]	XM_022128807.1/0.0/XM_022128807.1 PREDICTED: Helianthus annuus WD-40 repeat-containing protein MSI4-like (LOC110880220), mRNA	sp|O22607|MSI4_ARATH/8.3e-35/WD-40 repeat-containing protein MSI4 OS=Arabidopsis thaliana OX=3702 GN=MSI4 PE=1 SV=3	At2g19520/1.9e-34/[B] KOG0264 Nucleosome remodeling factor, subunit CAF1/NURF55/MSI1	NA	cellular_component:GO:0005634//nucleus;
isoform_219592	protein turnover, morphological adaption, signaling transduction (hormone signaling)	140	Sap-miR393-5p	TIR1	transport inhibitor response 1	egr:104441079/7.8e-263/protein TRANSPORT INHIBITOR RESPONSE 1; K14485 transport inhibitor response 1	0.064	OWM77537.1/3.8e-282/hypothetical protein CDL15_Pgr016935 [Punica granatum] >PKI74763.1 hypothetical protein CRG98_004872 [Punica granatum]	XM_010268960.2/0.0/XM_010268960.2 PREDICTED: Nelumbo nucifera aquaporin TIP1-1 (LOC104604560), mRNA	sp|Q570C0|TIR1_ARATH/1.5e-179/Protein TRANSPORT INHIBITOR RESPONSE 1 OS=Arabidopsis thaliana OX=3702 GN=TIR1 PE=1 SV=2	At3g62980/3.5e-179/[R] KOG1947 Leucine rich repeat proteins, some proteins contain F-box	isoform_219592/2.1e-08/Leucine Rich repeats (2 copies)	NA
isoform_222252	signaling transduction (MAPK signaling)	141	Sap-nmiR6	EIN3	ethylene-insensitive protein 2	egr:104421411/4.3e-236/protein ETHYLENE INSENSITIVE 3; K14514 ethylene-insensitive protein 3	0.064	OWM69086.1/4.4e-277/hypothetical protein CDL15_Pgr025273 [Punica granatum]	XM_010062812.2/0.0/XM_010062812.2 PREDICTED: Eucalyptus grandis 24-methylenesterol C-methyltransferase 2 (LOC104448882), mRNA	sp|O24606|EIN3_ARATH/9.5e-181/Protein ETHYLENE INSENSITIVE 3 OS=Arabidopsis thaliana OX=3702 GN=EIN3 PE=1 SV=1	At1g20330/1.6e-175/[IR] KOG1269 SAM-dependent methyltransferases	isoform_222252/3.9e-108/Ethylene insensitive 3	cellular_component:GO:0005634//nucleus;molecular_function:GO:0003700//DNA-binding transcription factor activity;
isoform_224640		142	Sap-miR396b	PSMC5, RPT6	26S proteasome regulatory subunit T6	nsy:104221125/5.0e-80/26S protease regulatory subunit 8 homolog A-like; K03066 26S proteasome regulatory subunit T6	0.064	PKI46252.1/3.7e-79/hypothetical protein CRG98_033379 [Punica granatum]	XM_021788803.1/0.0/XM_021788803.1 PREDICTED: Hevea brasiliensis 26S proteasome regulatory subunit 8 homolog A-like (LOC110638295), transcript variant X2, mRNA	sp|Q9C5U3|PRS8A_ARATH/1.1e-80/26S proteasome regulatory subunit 8 homolog A OS=Arabidopsis thaliana OX=3702 GN=RPT6A PE=1 SV=1	At5g20000/2.5e-80/[O] KOG0728 26S proteasome regulatory complex, ATPase RPT6	isoform_224640/2e-12/ATPase family associated with various cellular activities (AAA)	biological_process:GO:0030163//protein catabolic process;cellular_component:GO:0000502//proteasome complex;GO:0005737//cytoplasm;molecular_function:GO:0016787//hydrolase activity;GO:0008233//peptidase activity;GO:0005524//ATP binding;
isoform_225134		143	Sap-miR8620	MYF6, MRF4	myogenic factor 6	vvi:100259155/1.8e-64/transcription factor bHLH96; K18485 myogenic factor 6	0.064	OWM65653.1/5.4e-110/hypothetical protein CDL15_Pgr017150 [Punica granatum] >PKI46772.1 hypothetical protein CRG98_032844 [Punica granatum]	XM_010928040.2/0.0/XM_010928040.2 PREDICTED: Elaeis guineensis transcription factor bHLH94-like (LOC105048652), mRNA	sp|Q9C7T4|BH096_ARATH/1.2e-58/Transcription factor bHLH96 OS=Arabidopsis thaliana OX=3702 GN=BHLH96 PE=1 SV=1	At1g72210/2.7e-58/[KT] LSE0107 A bHLH transcription factor	isoform_225134/7.3e-11/Helix-loop-helix DNA-binding domain	molecular_function:GO:0046983//protein dimerization activity;
isoform_227368		144	Sap-miR530a	RP-S15e, RPS15	small subunit ribosomal protein S15e; transcription factor	thj:104815985/1.1e-12/uncharacterized protein LOC104815985 isoform X1; K02958 small subunit ribosomal protein S15e	0.064	PKI61650.1/4.4e-61/hypothetical protein CRG98_017962 [Punica granatum]	XM_019200292.1/0.0/XM_019200292.1 PREDICTED: Nelumbo nucifera uncharacterized LOC104612413 (LOC104612413), transcript variant X4, mRNA	NA	NA	isoform_227368/0.00014/Plus-3 domain	biological_process:GO:0006368//transcription elongation from RNA polymerase II promoter;GO:0016570//histone modification;cellular_component:GO:0016593//Cdc73/Paf1 complex;molecular_function:GO:0003677//DNA binding;GO:0008270//zinc ion binding;
isoform_229501	osmotic protection	145	Sap-miR530a	GLCAT14	beta-glucuronosyltransferase	thj:104815985/1.7e-30/uncharacterized protein LOC104815985 isoform X1; K02958 small subunit ribosomal protein S15e	0.064	OWM87852.1/0.0e+00/hypothetical protein CDL15_Pgr019436 [Punica granatum]	XM_010025721.2/0.0/XM_010025721.2 PREDICTED: Eucalyptus grandis uncharacterized LOC104414572 (LOC104414572), transcript variant X1, mRNA	NA	NA	isoform_229501/2.7e-11/Plus-3 domain	biological_process:GO:0006368//transcription elongation from RNA polymerase II promoter;GO:0016570//histone modification;cellular_component:GO:0016593//Cdc73/Paf1 complex;molecular_function:GO:0003677//DNA binding;GO:0008270//zinc ion binding;
isoform_23175		146	Sap-miR166d-5p	K22395	cinnamyl-alcohol dehydrogenase	cit:102630907/8.5e-98/berberine bridge enzyme-like 15; K22395 cinnamyl-alcohol dehydrogenase [EC:1.1.1.195]	0.129	PKI42428.1/1.2e-97/hypothetical protein CRG98_037185 [Punica granatum]	XM_017579556.1/0.0/XM_017579556.1 PREDICTED: Vigna angularis flavin-dependent oxidoreductase FOX2-like (LOC108341889), mRNA	sp|O64743|BBE15_ARATH/3.4e-89/Berberine bridge enzyme-like 15 OS=Arabidopsis thaliana OX=3702 GN=MEE23 PE=1 SV=1	At2g34790/7.9e-89/[QG] LSE0347 A Predicted berberine bridge enzyme/FAD-binding oxidoreductase	isoform_23175/2.6e-21/FAD binding domain	molecular_function:GO:0016491//oxidoreductase activity;GO:0071949//FAD binding;
isoform_236637	signaling transduction (MAPK signaling)	147	Sap-miR4995	PP2C	protein phosphatase 2C	egr:104454324/1.5e-161/protein phosphatase 2C 37; K14497 protein phosphatase 2C [EC:3.1.3.16]	0.064	XP_010067439.1/1.1e-160/PREDICTED: protein phosphatase 2C 37 [Eucalyptus grandis] >KCW65564.1 hypothetical protein EUGRSUZ_G02960 [Eucalyptus grandis]	XM_010058577.2/0.0/XM_010058577.2 PREDICTED: Eucalyptus grandis chlorophyll a-b binding protein of LHCII type 1 (LOC104444821), mRNA	sp|P27493|CB22_TOBAC/4.6e-137/Chlorophyll a-b binding protein 21, chloroplastic OS=Nicotiana tabacum OX=4097 GN=CAB21 PE=2 SV=1	At1g29930/2.2e-126/[C] LSE0391 A Chlorophyll A/B binding protein	isoform_236637/5.3e-64/Protein phosphatase 2C	biological_process:GO:0018298//protein-chromophore linkage;GO:0009765//photosynthesis, light harvesting;cellular_component:GO:0009535//chloroplast thylakoid membrane;GO:0009523//photosystem II;GO:0016021//integral component of membrane;GO:0009522//photosystem I;molecular_function:GO:0004722//protein serine/threonine phosphatase activity;GO:0046872//metal ion binding;GO:0016168//chlorophyll bindin…
isoform_236688		148	Sap-miR172b_2	Pop1-86K15	Populus trichocarpa clone Pop1-86K15	NA	0.064	NA	AC182714.2/0.0/AC182714.2 Populus trichocarpa clone Pop1-86K15, complete sequence	NA	NA	NA	NA
isoform_239175	signaling transduction (hormone signaling)	149	Sap-miR169a-5p, Sap-miR169d-5p, Sap-miR169e, Sap-miR169v	NFYA, HAP2	nuclear transcription factor Y, alpha; transcription factor	egr:104421514/2.2e-49/nuclear transcription factor Y subunit A-1; K08064 nuclear transcription factor Y, alpha	0.064	PKI42496.1/9.3e-65/hypothetical protein CRG98_037085 [Punica granatum]	XM_021761373.1/0.0/XM_021761373.1 PREDICTED: Manihot esculenta nuclear transcription factor Y subunit A-1-like (LOC110618242), mRNA	sp|Q945M9|NFYA9_ARATH/7.2e-35/Nuclear transcription factor Y subunit A-9 OS=Arabidopsis thaliana OX=3702 GN=NFYA9 PE=1 SV=1	At3g20910/1.7e-34/[K] KOG1561 CCAAT-binding factor, subunit B (HAP2)	isoform_239175/1.1e-28/CCAAT-binding transcription factor (CBF-B/NF-YA) subunit B	cellular_component:GO:0016602//CCAAT-binding factor complex;molecular_function:GO:0003677//DNA binding;GO:0003700//DNA-binding transcription factor activity;
isoform_23970		150	Sap-nmiR3	TFIP11	tuftelin-interacting protein 11	egr:104452843/2.1e-85/septin and tuftelin-interacting protein 1 homolog 1; K13103 tuftelin-interacting protein 11	0.129	XP_010065638.1/1.6e-84/PREDICTED: septin and tuftelin-interacting protein 1 homolog 1 [Eucalyptus grandis] >KCW63225.1 hypothetical protein EUGRSUZ_G00845 [Eucalyptus grandis]	XM_010067336.2/0.0/XM_010067336.2 PREDICTED: Eucalyptus grandis septin and tuftelin-interacting protein 1 homolog 1 (LOC104452843), mRNA	sp|Q9SHG6|STIP1_ARATH/2.9e-56/Septin and tuftelin-interacting protein 1 homolog 1 OS=Arabidopsis thaliana OX=3702 GN=STIPL1 PE=1 SV=1	At1g17070/6.7e-56/[A] KOG2184 Tuftelin-interacting protein TIP39, contains G-patch domain	isoform_23970/3.3e-33/GC-rich sequence DNA-binding factor-like protein	biological_process:GO:0006397//mRNA processing;GO:0008380//RNA splicing;cellular_component:GO:0005681//spliceosomal complex;molecular_function:GO:0003676//nucleic acid binding;
isoform_240455		151	Sap-miR171b	CDL15	hypothetical protein	NA	0.064	OWM64907.1/0.0e+00/hypothetical protein CDL15_Pgr028624 [Punica granatum]	XM_018964800.1/0.0/XM_018964800.1 PREDICTED: Juglans regia scarecrow-like protein 27 (LOC108990734), mRNA	sp|O81316|SCL6_ARATH/1.3e-111/Scarecrow-like protein 6 OS=Arabidopsis thaliana OX=3702 GN=SCL6 PE=1 SV=1	At4g00150/2.9e-111/[TK] LSE0487 A Gibberellin response modulator/Predicted transcription factor	isoform_240455/6.5e-88/GRAS domain family	NA
isoform_242332	ion homeostasis	152	Sap-miR4995, Sap-nmiR10	CLNS1A	chloride channel, nucleotide-sensitive, 1A	mdm:103439655/1.1e-50/chloride conductance regulatory protein ICln-like; K05019 chloride channel, nucleotide-sensitive, 1A	0.064	PKI50798.1/5.3e-70/hypothetical protein CRG98_028793 [Punica granatum]	MF362689.1/0.0/MF362689.1 Ambrosia artemisiifolia chloroplast, complete genome	sp|Q9LVA7|ICLN_ARATH/1.6e-47/Chloride conductance regulatory protein ICln OS=Arabidopsis thaliana OX=3702 GN=At5g62290 PE=2 SV=1	At5g62290/3.6e-47/[P] KOG3238 Chloride ion current inducer protein	isoform_242332/1.4e-09/Putative GTPase activating protein for Arf	biological_process:GO:0006884//cell volume homeostasis;GO:0006821//chloride transport;GO:0000387//spliceosomal snRNP assembly;cellular_component:GO:0034709//methylosome;GO:0034715//pICln-Sm protein complex;GO:0005829//cytosol;GO:0005886//plasma membrane;molecular_function:GO:0046872//metal ion binding;GO:0005096//GTPase activator activity;
isoform_243533	signaling transduction (MAPK signaling)	153	Sap-nmiR1	MYC2	transcription factor MYC2	mesc:110604711/5.6e-199/transcription factor MYC2; K13422 transcription factor MYC2	0.064	OWM88281.1/4.6e-234/hypothetical protein CDL15_Pgr003693 [Punica granatum] >PKI46882.1 hypothetical protein CRG98_032693 [Punica granatum]	XM_020360905.1/0.0/XM_020360905.1 PREDICTED: Cajanus cajan transcription factor MYC2-like (LOC109800173), mRNA	sp|Q39204|MYC2_ARATH/1.5e-133/Transcription factor MYC2 OS=Arabidopsis thaliana OX=3702 GN=MYC2 PE=1 SV=2	At1g32640/3.4e-133/[KT] LSE0107 A bHLH transcription factor	isoform_243533/7.1e-43/bHLH-MYC and R2R3-MYB transcription factors N-terminal	molecular_function:GO:0046983//protein dimerization activity;
isoform_244168		154	Sap-miR396a-3p_4	SCPL-I	serine carboxypeptidase-like clade I	egr:104418640/4.0e-30/serine carboxypeptidase-like 18; K16296 serine carboxypeptidase-like clade I [EC:3.4.16.-]	0.064	XP_010028337.1/2.9e-29/PREDICTED: serine carboxypeptidase-like 18 [Eucalyptus grandis] >KCW55060.1 hypothetical protein EUGRSUZ_I01035 [Eucalyptus grandis]	NA	sp|Q9CAU2|SCP5_ARATH/5.3e-12/Serine carboxypeptidase-like 5 OS=Arabidopsis thaliana OX=3702 GN=SCPL5 PE=2 SV=2	At1g73290/1.2e-11/[OE] KOG1282 Serine carboxypeptidases (lysosomal cathepsin A)	isoform_244168/7.2e-07/Serine carboxypeptidase	cellular_component:GO:0016021//integral component of membrane;molecular_function:GO:0004185//serine-type carboxypeptidase activity;
isoform_244260	detoxificants	155	Sap-miR4995	AOXH	L-ascorbate oxidase homolog	cmo:103484753/4.7e-145/L-ascorbate oxidase homolog; K19791 iron transport multicopper oxidase	0.064	PKI65704.1/1.2e-216/hypothetical protein CRG98_013893 [Punica granatum]	XM_018970854.1/0.0/XM_018970854.1 PREDICTED: Juglans regia L-ascorbate oxidase homolog (LOC108995317), mRNA	sp|P29162|ASOL_TOBAC/5.0e-100/L-ascorbate oxidase homolog OS=Nicotiana tabacum OX=4097 PE=2 SV=1	At5g66920/6.6e-132/[Q] KOG1263 Multicopper oxidases	isoform_244260/3.5e-83/AUX/IAA family	molecular_function:GO:0005507//copper ion binding;GO:0016491//oxidoreductase activity;
isoform_245143	ion homeostasis	156	Sap-nmiR19	ABCC1, MRP1	ATP-binding cassette, subfamily C (CFTR/MRP), member 1	fve:101298730/1.9e-222/ABC transporter C family member 12-like; K05665 ATP-binding cassette, subfamily C (CFTR/MRP), member 1 [EC:7.6.2.3]	0.064	XP_004304713.1/1.4e-221/PREDICTED: ABC transporter C family member 12-like [Fragaria vesca subsp. vesca] >XP_011468355.1 PREDICTED: ABC transporter C family member 12-like [Fragaria vesca subsp. vesca]	XM_010053691.2/0.0/XM_010053691.2 PREDICTED: Eucalyptus grandis ABC transporter C family member 12 (LOC104440734), mRNA	sp|Q9C8H0|AB12C_ARATH/2.7e-158/ABC transporter C family member 12 OS=Arabidopsis thaliana OX=3702 GN=ABCC12 PE=2 SV=1	At1g30410/6.2e-158/[Q] KOG0054 Multidrug resistance-associated protein/mitoxantrone resistance protein, ABC superfamily	isoform_245143/6.5e-13/ABC transporter transmembrane region	cellular_component:GO:0016021//integral component of membrane;molecular_function:GO:0005524//ATP binding;GO:0042626//ATPase activity, coupled to transmembrane movement of substances;
isoform_245305	morphological adaption, signaling transduction (hormone signaling)	157	Sap-miR160b	K14486, ARF	auxin response factor; transcription factor	ini:109165771/1.6e-30/auxin response factor 3-like; K14486 auxin response factor	0.064	PKI51963.1/2.3e-184/hypothetical protein CRG98_027615 [Punica granatum]	XM_003538112.3/0.0/XM_003538112.3 PREDICTED: Glycine max auxin response factor 18-like (LOC100810558), mRNA	sp|Q7XKK6|ARFJ_ORYSJ/1.6e-118/Auxin response factor 10 OS=Oryza sativa subsp. japonica OX=39947 GN=ARF10 PE=2 SV=3	At2g28350/2.4e-109/[TK] LSE0284 A Auxin response transcription factor	isoform_245305/3.2e-31/Auxin response factor	biological_process:GO:0010154//fruit development;GO:0009738//abscisic acid-activated signaling pathway;GO:0006355//regulation of transcription, DNA-templated;GO:0009734//auxin-activated signaling pathway;GO:0007389//pattern specification process;GO:0009743//response to carbohydrate;GO:0051301//cell division;GO:0048829//root cap development;GO:0048589//developmental growth;GO:0031540//regulation o…
isoform_246		158	Sap-miR169a-3p	CDC15	cell division control protein CDC15	gsl:Gasu_53970/2.2e-86/serine/threonine protein kinase; K06683 cell division control protein CDC15 [EC:2.7.11.1]	0.129	OWM63134.1/0.0e+00/hypothetical protein CDL15_Pgr008050 [Punica granatum]	XM_018864128.1/0.0/XM_018864128.1 PREDICTED: Eucalyptus grandis MAP3K epsilon protein kinase 1-like (LOC104421592), mRNA	sp|Q9LJD8|M3KE1_ARATH/0.0e+00/MAP3K epsilon protein kinase 1 OS=Arabidopsis thaliana OX=3702 GN=M3KE1 PE=1 SV=1	At3g13530/0.0e+00/[T] KOG0198 MEKK and related serine/threonine protein kinases	isoform_246/1.1e-74/Protein kinase domain	molecular_function:GO:0005524//ATP binding;GO:0004672//protein kinase activity;
isoform_246385	signaling transduction (hormone signaling)	159	Sap-nmiR8	SNRK2	serine/threonine-protein kinase SRK2	gra:105762848/1.0e-13/serine/threonine-protein kinase SRK2B; K14498 serine/threonine-protein kinase SRK2 [EC:2.7.11.1]	0.064	XP_012436237.1/7.5e-13/PREDICTED: serine/threonine-protein kinase SRK2B [Gossypium raimondii] >KJB47468.1 hypothetical protein B456_008G027800 [Gossypium raimondii]	MF362689.1/0.0/MF362689.1 Ambrosia artemisiifolia chloroplast, complete genome	sp|Q9C958|SRK2B_ARATH/7.1e-13/Serine/threonine-protein kinase SRK2B OS=Arabidopsis thaliana OX=3702 GN=SRK2B PE=1 SV=1	At1g60940/1.6e-12/[T] KOG0583 Serine/threonine protein kinase	NA	molecular_function:GO:0004674//protein serine/threonine kinase activity;GO:0005524//ATP binding;
isoform_246892	morphological adaption	160	Sap-miR393-5p	snR59	transport inhibitor response 1	egr:104441079/1.3e-280/protein TRANSPORT INHIBITOR RESPONSE 1; K14485 transport inhibitor response 1	0.064	OWM77537.1/6.4e-305/hypothetical protein CDL15_Pgr016935 [Punica granatum] >PKI74763.1 hypothetical protein CRG98_004872 [Punica granatum]	NA	sp|Q570C0|TIR1_ARATH/1.1e-189/Protein TRANSPORT INHIBITOR RESPONSE 1 OS=Arabidopsis thaliana OX=3702 GN=TIR1 PE=1 SV=2	At3g62980/2.5e-189/[R] KOG1947 Leucine rich repeat proteins, some proteins contain F-box	isoform_246892/3.2e-08/Leucine Rich repeats (2 copies)	biological_process:GO:0031146//SCF-dependent proteasomal ubiquitin-dependent protein catabolic process;GO:0016567//protein ubiquitination;cellular_component:GO:0019005//SCF ubiquitin ligase complex;
isoform_247705	protein turnover	161	Sap-miR164a, Sap-miR164b, Sap-miR164e	SKP2, FBXL1	F-box and leucine-rich repeat protein 1 (S-phase kinase-associated protein 2)	egr:104449651/5.5e-165/F-box protein SKP2A; K03875 F-box and leucine-rich repeat protein 1 (S-phase kinase-associated protein 2)	0.064	OWM74667.1/3.4e-187/hypothetical protein CDL15_Pgr005247 [Punica granatum]	XM_010938900.2/0.0/XM_010938900.2 PREDICTED: Elaeis guineensis NAC domain-containing protein 100 (LOC105056634), transcript variant X6, mRNA	sp|Q9LPL4|SKP2A_ARATH/5.6e-147/F-box protein SKP2A OS=Arabidopsis thaliana OX=3702 GN=SKP2A PE=1 SV=1	At1g21410/1.3e-146/[R] KOG1947 Leucine rich repeat proteins, some proteins contain F-box	isoform_247705/6.3e-29/No apical meristem (NAM) protein	molecular_function:GO:0005524//ATP binding;
isoform_248817		162	Sap-miR535a	PABPC	polyadenylate-binding protein	ghi:107908893/8.1e-56/polyadenylate-binding protein 8-like; K13126 polyadenylate-binding protein	0.064	XP_016691670.1/5.9e-55/PREDICTED: polyadenylate-binding protein 8-like [Gossypium hirsutum]	XM_021790991.1/0.0/XM_021790991.1 PREDICTED: Hevea brasiliensis polyadenylate-binding protein 8-like (LOC110639877), mRNA	sp|P42731|PABP2_ARATH/2.1e-38/Polyadenylate-binding protein 2 OS=Arabidopsis thaliana OX=3702 GN=PAB2 PE=1 SV=1	At4g34110/4.9e-38/[AJ] KOG0123 Polyadenylate-binding protein (RRM superfamily)	NA	cellular_component:GO:0005737//cytoplasm;molecular_function:GO:0003723//RNA binding;
isoform_250099		163	Sap-miR530a	CRG98	hypothetical protein	NA	0.064	PKI52378.1/8.9e-71/hypothetical protein CRG98_027304 [Punica granatum]	XM_017782626.1/0.0/XM_017782626.1 PREDICTED: Gossypium arboreum uncharacterized LOC108479818 (LOC108479818), mRNA	NA	NA	isoform_250099/0.013/TGS domain	NA
isoform_250280		164	Sap-miR396a-3p_4, Sap-miR396b-3p	NA	lysophospholipase BODYGUARD 4 isoform X2	NA	0.064	XP_018724662.1/8.7e-14/PREDICTED: probable lysophospholipase BODYGUARD 4 isoform X2 [Eucalyptus grandis]	NA	sp|Q700D5|BDG4_ARATH/8.5e-11/Probable lysophospholipase BODYGUARD 4 OS=Arabidopsis thaliana OX=3702 GN=BDG4 PE=2 SV=1	At5g17720/1.3e-09/[R] KOG1454 Predicted hydrolase/acyltransferase (alpha/beta hydrolase superfamily)	NA	cellular_component:GO:0016021//integral component of membrane;
isoform_250628		165	Sap-miR535a	NA	uncharacterized LOC18612609 (LOC18612609), transcript variant X3, ncRNA	NA	0.064	NA	XR_001927389.1/0.0/XR_001927389.1 PREDICTED: Theobroma cacao uncharacterized LOC18612609 (LOC18612609), transcript variant X3, ncRNA	NA	NA	NA	NA
isoform_252950	signaling transduction (hormone signaling)	166	Sap-miR172a_2, Sap-miR172d	AP2	AP2-like factor, euAP2 lineage; transcription factor	egr:104454178/1.2e-94/ethylene-responsive transcription factor RAP2-7 isoform X1; K09284 AP2-like factor, euAP2 lineage	0.064	PKI43284.1/2.2e-156/hypothetical protein CRG98_036370 [Punica granatum]	XM_011098948.2/0.0/XM_011098948.2 PREDICTED: Sesamum indicum floral homeotic protein APETALA 2-like (LOC105176219), transcript variant X2, mRNA	sp|Q9SK03|RAP27_ARATH/1.0e-78/Ethylene-responsive transcription factor RAP2-7 OS=Arabidopsis thaliana OX=3702 GN=RAP2-7 PE=2 SV=2	At2g28550/2.4e-75/[K] LSE0337 A Ovule development protein/AP2 domain transcription factor	isoform_252950/2.6e-09/AP2 domain	cellular_component:GO:0005634//nucleus;molecular_function:GO:0003677//DNA binding;GO:0003700//DNA-binding transcription factor activity;
isoform_252981	basic metabolism adaption	167	Sap-miR396-3p	PAT, AAT	bifunctional aspartate aminotransferase and glutamate/aspartate-prephenate aminotransferase	gmx:100776446/3.5e-103/bifunctional aspartate aminotransferase and glutamate/aspartate-prephenate aminotransferase; K15849 bifunctional aspartate aminotransferase and glutamate/aspartate-prephenate aminotransferase [EC:2.6.1.1 2.6.1.78 2.6.1.79]	0.064	XP_023874204.1/2.5e-102/bifunctional aspartate aminotransferase and glutamate/aspartate-prephenate aminotransferase-like [Quercus suber]	XM_017764674.1/0.0/XM_017764674.1 PREDICTED: Gossypium arboreum bifunctional aspartate aminotransferase and glutamate/aspartate-prephenate aminotransferase (LOC108464392), transcript variant X3, mRNA	sp|E9L7A5|PAT_PETHY/1.6e-101/Bifunctional aspartate aminotransferase and glutamate/aspartate-prephenate aminotransferase OS=Petunia hybrida OX=4102 PE=1 SV=1	At2g22250/5.3e-97/[E] KOG0257 Kynurenine aminotransferase, glutamine transaminase K	isoform_252981/6.5e-40/Aminotransferase class I and II	biological_process:GO:0009058//biosynthetic process;molecular_function:GO:0003824//catalytic activity;GO:0030170//pyridoxal phosphate binding;
isoform_253042		168	Sap-miR169r-3p	NA	NA	NA	0.064	NA	NA	NA	NA	NA	NA
isoform_253434		169	Sap-miR530a	RP-S15e, RPS15	small subunit ribosomal protein S15e; transcription factor	thj:104815985/7.0e-36/uncharacterized protein LOC104815985 isoform X1; K02958 small subunit ribosomal protein S15e	0.064	OWM87852.1/1.9e-268/hypothetical protein CDL15_Pgr019436 [Punica granatum]	XM_019200292.1/0.0/XM_019200292.1 PREDICTED: Nelumbo nucifera uncharacterized LOC104612413 (LOC104612413), transcript variant X4, mRNA	NA	NA	isoform_253434/1.7e-11/Plus-3 domain	biological_process:GO:0006368//transcription elongation from RNA polymerase II promoter;GO:0016570//histone modification;cellular_component:GO:0016593//Cdc73/Paf1 complex;molecular_function:GO:0003677//DNA binding;GO:0008270//zinc ion binding;
isoform_254145		170	Sap-miR172a_2	RP-S3Ae, RPS3A	small subunit ribosomal protein S3Ae; transcription factor	ini:109178516/2.4e-48/AP2-like ethylene-responsive transcription factor TOE3; K09284 AP2-like factor, euAP2 lineage	0.064	PKI33364.1/5.5e-78/hypothetical protein CRG98_046230 [Punica granatum]	XM_017779172.1/0.0/XM_017779172.1 PREDICTED: Gossypium arboreum floral homeotic protein APETALA 2-like (LOC108476820), transcript variant X5, mRNA	sp|P47927|AP2_ARATH/6.0e-34/Floral homeotic protein APETALA 2 OS=Arabidopsis thaliana OX=3702 GN=AP2 PE=1 SV=1	At4g36920/1.4e-33/[K] LSE0337 A Ovule development protein/AP2 domain transcription factor	isoform_254145/0.00069/AP2 domain	cellular_component:GO:0005634//nucleus;molecular_function:GO:0003677//DNA binding;GO:0003700//DNA-binding transcription factor activity;
isoform_254592	basic metabolism adaption	171	Sap-nmiR6	yggS, PROSC	PLP dependent protein	rcu:8278924/6.4e-118/pyridoxal phosphate homeostasis protein; K06997 PLP dependent protein	0.064	OWM66209.1/2.7e-205/hypothetical protein CDL15_Pgr013426 [Punica granatum]	XM_018951187.1/0.0/XM_018951187.1 PREDICTED: Juglans regia uncharacterized protein At1g04910-like (LOC108980320), transcript variant X2, mRNA	sp|Q0WUZ5|OFT39_ARATH/7.0e-187/O-fucosyltransferase 39 OS=Arabidopsis thaliana OX=3702 GN=OFUT39 PE=2 SV=1	At4g26860/1.2e-104/[R] KOG3157 Proline synthetase co-transcribed protein	isoform_254592/2.9e-53/Chaperonin 10 Kd subunit	biological_process:GO:0006004//fucose metabolic process;molecular_function:GO:0016757//transferase activity, transferring glycosyl groups;
isoform_254621	signaling transduction (hormone signaling)	172	Sap-miR172a_2, Sap-miR172d	AP2	AP2-like factor, euAP2 lineage; transcription factor	jre:108981197/1.7e-116/ethylene-responsive transcription factor RAP2-7-like; K09284 AP2-like factor, euAP2 lineage	0.064	OWM82371.1/5.0e-165/hypothetical protein CDL15_Pgr001945 [Punica granatum]	KX868942.1/0.0/KX868942.1 Vernicia fordii clone comp192732_c0 AP2/ERF domain-containing transcription factor mRNA, complete cds	sp|Q8H443|AP23_ORYSJ/4.3e-94/APETALA2-like protein 3 OS=Oryza sativa subsp. japonica OX=39947 GN=AP2-3 PE=1 SV=1	At2g28550/1.1e-92/[K] LSE0337 A Ovule development protein/AP2 domain transcription factor	isoform_254621/2.5e-19/AP2 domain	cellular_component:GO:0005634//nucleus;molecular_function:GO:0032440//2-alkenal reductase [NAD(P)] activity;GO:0003677//DNA binding;GO:0003700//DNA-binding transcription factor activity;
isoform_254628		173	Sap-miR169r-3p	E1.10.3.3	L-ascorbate oxidase	egr:104423769/1.4e-273/L-ascorbate oxidase homolog; K00423 L-ascorbate oxidase [EC:1.10.3.3]	0.064	OWM76317.1/3.8e-299/hypothetical protein CDL15_Pgr009963 [Punica granatum]	XM_007208225.2/0.0/XM_007208225.2 PREDICTED: Prunus persica L-ascorbate oxidase homolog (LOC18772581), mRNA	sp|Q00624|ASOL_BRANA/1.0e-245/L-ascorbate oxidase homolog OS=Brassica napus OX=3708 GN=Bp10 PE=2 SV=1	At1g55570/5.4e-250/[Q] KOG1263 Multicopper oxidases	isoform_254628/2.6e-40/Multicopper oxidase	molecular_function:GO:0005507//copper ion binding;GO:0016491//oxidoreductase activity;
isoform_255703	ion homeostasis, basic metabolism adaption	174	Sap-miR396a-3p_2	USP7, UBP15	ubiquitin carboxyl-terminal hydrolase 7	egr:104425548/3.8e-13/ubiquitin carboxyl-terminal hydrolase 12 isoform X2; K11838 ubiquitin carboxyl-terminal hydrolase 7 [EC:3.4.19.12]	0.064	OWM79006.1/2.5e-45/hypothetical protein CDL15_Pgr003177 [Punica granatum]	NA	sp|Q9FPT1|UBP12_ARATH/1.7e-11/Ubiquitin carboxyl-terminal hydrolase 12 OS=Arabidopsis thaliana OX=3702 GN=UBP12 PE=1 SV=2	At5g06600/3.9e-11/[O] KOG1863 Ubiquitin carboxyl-terminal hydrolase	NA	cellular_component:GO:0016021//integral component of membrane;
isoform_256106	ion homeostasis	175	Sap-nmiR3	ATPF1D, atpH	F-type H+-transporting ATPase subunit delta	pmum:103336090/1.6e-62/ATP synthase delta chain, chloroplastic; K02113 F-type H+-transporting ATPase subunit delta	0.064	PHT25639.1/5.1e-94/hypothetical protein CQW23_34740 [Capsicum baccatum]	AF389242.1/0.0/AF389242.1 Berberidopsis corallina 26S ribosomal RNA gene, partial sequence	sp|P32980|ATPD_TOBAC/5.6e-58/ATP synthase delta chain, chloroplastic OS=Nicotiana tabacum OX=4097 GN=ATPD PE=2 SV=1	At4g09650/3.5e-55/[C] KOG1662 Mitochondrial F1F0-ATP synthase, subunit OSCP/ATP5	NA	NA
isoform_257423	signaling transduction (hormone signaling)	176	Sap-nmiR12	RGLG	E3 ubiquitin-protein ligase RGLG	cit:102608772/4.2e-22/E3 ubiquitin-protein ligase RGLG2; K16280 E3 ubiquitin-protein ligase RGLG [EC:2.3.2.27]	0.064	OWM62973.1/1.3e-173/hypothetical protein CDL15_Pgr020267 [Punica granatum]	XM_019402634.1/0.0/XM_019402634.1 PREDICTED: Nicotiana attenuata protein BONZAI 3 (LOC109236454), mRNA	sp|Q5XQC7|BON3_ARATH/3.9e-143/Protein BONZAI 3 OS=Arabidopsis thaliana OX=3702 GN=BON3 PE=1 SV=1	At1g08860/9.0e-143/[T] KOG1327 Copine	isoform_257423/3.3e-75/Copine	biological_process:GO:0060548//negative regulation of cell death;molecular_function:GO:0005544//calcium-dependent phospholipid binding;
isoform_257598		177	Sap-miR394a_2	CDL15	hypothetical protein	NA	0.064	OWM76213.1/8.6e-67/hypothetical protein CDL15_Pgr009859 [Punica granatum] >PKI76994.1 hypothetical protein CRG98_002497 [Punica granatum]	XM_008461785.2/0.0/XM_008461785.2 PREDICTED: Cucumis melo F-box only protein 6 (LOC103498950), transcript variant X9, mRNA	sp|Q9FZK1|FBX6_ARATH/2.3e-45/F-box only protein 6 OS=Arabidopsis thaliana OX=3702 GN=FBX6 PE=2 SV=1	At1g27340/5.3e-45/[R] LSE0005 A F-box domain	isoform_257598/1.4e-05/F-box domain	NA
isoform_259085	signaling transduction (hormone signaling)	178	Sap-miR172a_3	AP2	AP2-like factor, euAP2 lineage; transcription factor	tcc:18611171/4.7e-145/floral homeotic protein APETALA 2; K09284 AP2-like factor, euAP2 lineage	0.064	PKI33364.1/3.8e-159/hypothetical protein CRG98_046230 [Punica granatum]	XM_017779172.1/0.0/XM_017779172.1 PREDICTED: Gossypium arboreum floral homeotic protein APETALA 2-like (LOC108476820), transcript variant X5, mRNA	sp|P47927|AP2_ARATH/3.2e-115/Floral homeotic protein APETALA 2 OS=Arabidopsis thaliana OX=3702 GN=AP2 PE=1 SV=1	At4g36920/7.2e-115/[K] LSE0337 A Ovule development protein/AP2 domain transcription factor	isoform_259085/5.9e-19/AP2 domain	cellular_component:GO:0005634//nucleus;molecular_function:GO:0003677//DNA binding;GO:0003700//DNA-binding transcription factor activity;
isoform_260216	signaling transduction (hormone signaling)	179	Sap-nmiR23	DELLA	DELLA protein	jcu:105639299/4.6e-32/DELLA protein SLR1; K14494 DELLA protein	0.064	PKI39367.1/1.9e-111/hypothetical protein CRG98_040233 [Punica granatum]	XM_017368193.1/0.0/XM_017368193.1 PREDICTED: Daucus carota subsp. sativus scarecrow-like protein 9 (LOC108200117), transcript variant X2, mRNA	sp|O80933|SCL9_ARATH/1.6e-86/Scarecrow-like protein 9 OS=Arabidopsis thaliana OX=3702 GN=SCL9 PE=2 SV=1	At2g37650/3.6e-86/[TK] LSE0487 A Gibberellin response modulator/Predicted transcription factor	isoform_260216/3e-70/GRAS domain family	NA
isoform_260527		180	Sap-miR530a	NA	uncharacterized ncRNA	NA	0.064	NA	XR_002541507.1/0.0/XR_002541507.1 PREDICTED: Carica papaya uncharacterized LOC110824168 (LOC110824168), ncRNA	NA	NA	NA	NA
isoform_262359	protein turnover, morphological adaption, signaling transduction (hormone signaling)	181	Sap-miR393-5p	TIR1	transport inhibitor response 1	egr:104441079/4.3e-16/protein TRANSPORT INHIBITOR RESPONSE 1; K14485 transport inhibitor response 1	0.064	XP_010052384.1/3.2e-15/PREDICTED: protein TRANSPORT INHIBITOR RESPONSE 1 [Eucalyptus grandis] >XP_018727418.1 PREDICTED: protein TRANSPORT INHIBITOR RESPONSE 1 [Eucalyptus grandis] >KCW76344.1 hypothetical protein EUGRSUZ_D00716 [Eucalyptus grandis] >KCW76345.1 hypothetical protein EUGRSUZ_D00716 [Eucalyptus grandis]	NA	NA	NA	NA	NA
isoform_263453	signaling transduction (Ca2+ signaling)	182	Sap-nmiR6	CML	calcium-binding protein CML	egr:104425625/3.3e-127/probable calcium-binding protein CML49; K13448 calcium-binding protein CML	0.064	OWM78931.1/6.8e-145/hypothetical protein CDL15_Pgr003102 [Punica granatum]	XM_018953331.1/0.0/XM_018953331.1 PREDICTED: Juglans regia probable calcium-binding protein CML49 (LOC108982056), mRNA	sp|Q8W4L0|CML49_ARATH/9.7e-109/Probable calcium-binding protein CML49 OS=Arabidopsis thaliana OX=3702 GN=CML49 PE=2 SV=1	At3g10300/2.0e-88/[T] KOG0037 Ca2+-binding protein, EF-Hand protein superfamily	isoform_263453/2e-22/Myb-like DNA-binding domain	cellular_component:GO:0005634//nucleus;molecular_function:GO:0003677//DNA binding;GO:0005509//calcium ion binding;
isoform_264309	signaling transduction (hormone signaling)	183	Sap-miR172b_1, Sap-miR172c-3p, Sap-miR5368	AP2	AP2-like factor, euAP2 lineage; transcription factor	vvi:100268051/3.4e-157/AP2; transcription factor APETALA2; K09284 AP2-like factor, euAP2 lineage	0.064	PKI33364.1/1.1e-183/hypothetical protein CRG98_046230 [Punica granatum]	XM_021775752.1/0.0/XM_021775752.1 PREDICTED: Manihot esculenta floral homeotic protein APETALA 2 (LOC110628919), transcript variant X1, mRNA	sp|P47927|AP2_ARATH/7.9e-120/Floral homeotic protein APETALA 2 OS=Arabidopsis thaliana OX=3702 GN=AP2 PE=1 SV=1	At4g36920/1.8e-119/[K] LSE0337 A Ovule development protein/AP2 domain transcription factor	isoform_264309/6.2e-20/AP2 domain	cellular_component:GO:0005634//nucleus;molecular_function:GO:0003677//DNA binding;GO:0003700//DNA-binding transcription factor activity;
isoform_266486	osmotic protection	184	Sap-nmiR22	TPS	trehalose 6-phosphate synthase/phosphatase	tcc:18603871/0.0e+00/probable alpha,alpha-trehalose-phosphate synthase [UDP-forming] 9; K16055 trehalose 6-phosphate synthase/phosphatase [EC:2.4.1.15 3.1.3.12]	0.064	OWM65384.1/0.0e+00/hypothetical protein CDL15_Pgr008974 [Punica granatum] >PKI56973.1 hypothetical protein CRG98_022647 [Punica granatum]	AF479148.1/0.0/AF479148.1 Clarkia xantiana 26S ribosomal RNA gene, complete sequence	sp|Q9LRA7|TPS9_ARATH/4.7e-311/Probable alpha,alpha-trehalose-phosphate synthase [UDP-forming] 9 OS=Arabidopsis thaliana OX=3702 GN=TPS9 PE=2 SV=1	At1g23870/1.1e-310/[G] KOG1050 Trehalose-6-phosphate synthase component TPS1 and related subunits	isoform_266486/7.9e-152/Glycosyltransferase family 20	biological_process:GO:0005992//trehalose biosynthetic process;molecular_function:GO:0016740//transferase activity;GO:0003824//catalytic activity;
isoform_266810		185	Sap-miR535a	NA	uncharacterized LOC18612609 (LOC18612609), transcript variant X3, ncRNA	NA	0.064	NA	XR_001927389.1/0.0/XR_001927389.1 PREDICTED: Theobroma cacao uncharacterized LOC18612609 (LOC18612609), transcript variant X3, ncRNA	NA	NA	NA	NA
isoform_267514		186	Sap-miR530a	RP-S15e, RPS15	small subunit ribosomal protein S15e; transcription factor	thj:104815985/1.4e-31/uncharacterized protein LOC104815985 isoform X1; K02958 small subunit ribosomal protein S15e	0.064	OWM87852.1/1.3e-113/hypothetical protein CDL15_Pgr019436 [Punica granatum]	XM_019200292.1/0.0/XM_019200292.1 PREDICTED: Nelumbo nucifera uncharacterized LOC104612413 (LOC104612413), transcript variant X4, mRNA	NA	NA	isoform_267514/1.3e-12/Plus-3 domain	biological_process:GO:0006368//transcription elongation from RNA polymerase II promoter;GO:0016570//histone modification;cellular_component:GO:0016593//Cdc73/Paf1 complex;molecular_function:GO:0003677//DNA binding;GO:0008270//zinc ion binding;
isoform_269129		187	Sap-miR164a	WDR26	WD repeat-containing protein 26	oeu:111408549/2.3e-10/WD repeat-containing protein 26 homolog; K22382 WD repeat-containing protein 26	0.064	OWM70775.1/6.9e-173/hypothetical protein CDL15_Pgr014448 [Punica granatum] >PKI41712.1 hypothetical protein CRG98_037914 [Punica granatum]	XM_010061513.2/0.0/XM_010061513.2 PREDICTED: Eucalyptus grandis growth-regulating factor 6 (LOC104447797), mRNA	sp|Q6AWY3|GRF6_ORYSJ/3.2e-55/Growth-regulating factor 6 OS=Oryza sativa subsp. japonica OX=39947 GN=GRF6 PE=2 SV=2	At2g22840/7.4e-55/[S] LSE0397 A Uncharacterized protein	isoform_269129/2.7e-21/WRC	biological_process:GO:0032502//developmental process;GO:0006355//regulation of transcription, DNA-templated;GO:0006351//transcription, DNA-templated;cellular_component:GO:0005634//nucleus;molecular_function:GO:0005524//ATP binding;
isoform_269626	ion homeostasis	188	Sap-nmiR18	PMA1, PMA2	H+-transporting ATPase	mesc:110616612/0.0e+00/ATPase 11, plasma membrane-type; K01535 H+-transporting ATPase [EC:7.1.2.1]	0.064	OWM90448.1/0.0e+00/hypothetical protein CDL15_Pgr014751 [Punica granatum]	XM_002270308.4/0.0/XM_002270308.4 PREDICTED: Vitis vinifera HA11 H(+)-ATPase 11-like (LOC100241576), mRNA	sp|Q9LV11|PMA11_ARATH/0.0e+00/ATPase 11, plasma membrane-type OS=Arabidopsis thaliana OX=3702 GN=AHA11 PE=1 SV=1	At5g62670/0.0e+00/[P] KOG0205 Plasma membrane H+-transporting ATPase	isoform_269626/1.1e-21/E1-E2 ATPase	biological_process:GO:0120029//proton export across plasma membrane;cellular_component:GO:0016021//integral component of membrane;GO:0005886//plasma membrane;molecular_function:GO:0005524//ATP binding;GO:0008553//proton-exporting ATPase activity, phosphorylative mechanism;
isoform_270070	signaling transduction (hormone signaling)	189	Sap-miR172c-3p, Sap-miR5368	AP2	AP2-like factor, euAP2 lineage; transcription factor	pda:103711505/3.3e-61/AP2-like ethylene-responsive transcription factor TOE3 isoform X1; K09284 AP2-like factor, euAP2 lineage	0.064	PKI33364.1/1.7e-85/hypothetical protein CRG98_046230 [Punica granatum]	XM_009374151.2/0.0/XM_009374151.2 PREDICTED: Pyrus x bretschneideri floral homeotic protein APETALA 2-like (LOC103961581), transcript variant X2, mRNA	sp|P47927|AP2_ARATH/1.5e-35/Floral homeotic protein APETALA 2 OS=Arabidopsis thaliana OX=3702 GN=AP2 PE=1 SV=1	Hs19923466/1.9e-09/[A] KOG1869 Splicing coactivator SRm160/300, subunit SRm300	isoform_270070/4.3e-06/AP2 domain	cellular_component:GO:0005634//nucleus;GO:0016021//integral component of membrane;molecular_function:GO:0003677//DNA binding;GO:0003700//DNA-binding transcription factor activity;
isoform_270287	signaling transduction (hormone signaling)	190	Sap-miR172b_1, Sap-miR172c-3p, Sap-miR172d	AP2	AP2-like factor, euAP2 lineage; transcription factor	jre:108997119/8.6e-80/AP2-like ethylene-responsive transcription factor TOE3 isoform X1; K09284 AP2-like factor, euAP2 lineage	0.064	PKI43284.1/2.8e-111/hypothetical protein CRG98_036370 [Punica granatum]	JQ639103.1/0.0/JQ639103.1 Sonneratia apetala Apetala 2 (AP2) gene, partial cds	sp|Q9SK03|RAP27_ARATH/1.2e-68/Ethylene-responsive transcription factor RAP2-7 OS=Arabidopsis thaliana OX=3702 GN=RAP2-7 PE=2 SV=2	At2g28550/2.8e-68/[K] LSE0337 A Ovule development protein/AP2 domain transcription factor	isoform_270287/1.8e-09/AP2 domain	cellular_component:GO:0005634//nucleus;molecular_function:GO:0003677//DNA binding;GO:0003700//DNA-binding transcription factor activity;
isoform_27202	morphological adaption, signaling transduction (hormone signaling)	191	Sap-miR160h_1	K14486, ARF	auxin response factor; transcription factor	han:110870922/5.1e-07/auxin response factor 3-like; K14486 auxin response factor	0.129	OWM69712.1/1.5e-79/hypothetical protein CDL15_Pgr025561 [Punica granatum]	XM_010266365.2/0.0/XM_010266365.2 PREDICTED: Nelumbo nucifera auxin response factor 18-like (LOC104602613), mRNA	sp|Q93YR9|ARFP_ARATH/3.7e-32/Auxin response factor 16 OS=Arabidopsis thaliana OX=3702 GN=ARF16 PE=1 SV=1	At2g28350/3.2e-31/[TK] LSE0284 A Auxin response transcription factor	NA	biological_process:GO:0006355//regulation of transcription, DNA-templated;GO:0009734//auxin-activated signaling pathway;cellular_component:GO:0005634//nucleus;molecular_function:GO:0003677//DNA binding;
isoform_273801		192	Sap-miR396-3p	PELO, DOM34, pelA	protein pelota	boe:106311133/2.3e-37/protein PELOTA 1-like; K06965 protein pelota	0.064	KVI04461.1/8.6e-41/eRF1 domain 1/Pelota-like protein [Cynara cardunculus var. scolymus]	XM_017555482.1/0.0/XM_017555482.1 PREDICTED: Vigna angularis protein PELOTA 1 (LOC108323126), mRNA	sp|Q9ZT87|PEL1_ARATH/1.7e-33/Protein PELOTA 1 OS=Arabidopsis thaliana OX=3702 GN=PEL1 PE=2 SV=1	At4g27650/3.8e-33/[J] KOG2869 Meiotic cell division protein Pelota/DOM34	NA	biological_process:GO:0070966//nuclear-transcribed mRNA catabolic process, no-go decay;GO:0070481//nuclear-transcribed mRNA catabolic process, non-stop decay;GO:0071025//RNA surveillance;cellular_component:GO:0005634//nucleus;GO:0005737//cytoplasm;molecular_function:GO:0046872//metal ion binding;GO:0004519//endonuclease activity;
isoform_274963	signaling transduction (hormone signaling)	193	Sap-miR172e-3p, Sap-miR5368	AP2	AP2-like factor, euAP2 lineage; transcription factor	mdm:103445097/1.6e-113/AHAP2, AP2, AP2D40; floral homeotic protein APETALA 2; K09284 AP2-like factor, euAP2 lineage	0.064	OWM82163.1/2.7e-120/hypothetical protein CDL15_Pgr001737 [Punica granatum]	XM_021775752.1/0.0/XM_021775752.1 PREDICTED: Manihot esculenta floral homeotic protein APETALA 2 (LOC110628919), transcript variant X1, mRNA	sp|P47927|AP2_ARATH/8.1e-103/Floral homeotic protein APETALA 2 OS=Arabidopsis thaliana OX=3702 GN=AP2 PE=1 SV=1	At4g36920/1.9e-102/[K] LSE0337 A Ovule development protein/AP2 domain transcription factor	isoform_274963/6.5e-21/AP2 domain	cellular_component:GO:0005634//nucleus;molecular_function:GO:0003677//DNA binding;GO:0003700//DNA-binding transcription factor activity;
isoform_275116	ion homeostasis, basic metabolism adaption	194	Sap-nmiR8	USP5_13, UBP14	ubiquitin carboxyl-terminal hydrolase 5/13	zju:107430502/0.0e+00/ubiquitin carboxyl-terminal hydrolase 14 isoform X1; K11836 ubiquitin carboxyl-terminal hydrolase 5/13 [EC:3.4.19.12]	0.064	OWM88693.1/0.0e+00/hypothetical protein CDL15_Pgr002460 [Punica granatum]	XM_010062182.1/0.0/XM_010062182.1 PREDICTED: Eucalyptus grandis ubiquitin carboxyl-terminal hydrolase 14 (LOC104448385), mRNA	sp|Q8L6Y1|UBP14_ARATH/0.0e+00/Ubiquitin carboxyl-terminal hydrolase 14 OS=Arabidopsis thaliana OX=3702 GN=UBP14 PE=1 SV=1	Hs4507855/1.4e-229/[O] KOG0944 Ubiquitin-specific protease UBP14	isoform_275116/2.2e-58/Glycosyl hydrolases family 16	biological_process:GO:0006511//ubiquitin-dependent protein catabolic process;GO:0016579//protein deubiquitination;molecular_function:GO:0004843//thiol-dependent ubiquitin-specific protease activity;GO:0008270//zinc ion binding;
isoform_275374		195	Sap-miR396-3p, Sap-miR396a-3p_4	M4	Enhancer of split M4 family	NA	0.064	NA	LT669795.1/0.0/LT669795.1 Arabisalpina genome assembly, chromosome: 8	NA	NA	isoform_275374/0.1/Enhancer of split M4 family	NA
isoform_276164		196	Sap-miR396a-5p	CDL15	hypothetical protein	NA	0.064	OWM82113.1/4.1e-55/hypothetical protein CDL15_Pgr001687 [Punica granatum] >PKI44908.1 hypothetical protein CRG98_034856 [Punica granatum]	NA	sp|Q66GP0|SR1P1_ARATH/4.6e-32/BTB/POZ domain-containing protein SR1IP1 OS=Arabidopsis thaliana OX=3702 GN=SR1IP1 PE=1 SV=2	At3g49970/1.3e-18/[T] LSE1207 A Photoreceptor NPH1 (nonphototropic hypocotyl 1)-interacting protein	NA	NA
isoform_27723		197	Sap-miR396a-3p_4	BODYGUARD 4	lysophospholipase BODYGUARD 4	NA	0.193	XP_007204508.1/9.5e-156/probable lysophospholipase BODYGUARD 4 [Prunus persica] >ONH94453.1 hypothetical protein PRUPE_7G017500 [Prunus persica]	NA	sp|Q700D5|BDG4_ARATH/2.7e-112/Probable lysophospholipase BODYGUARD 4 OS=Arabidopsis thaliana OX=3702 GN=BDG4 PE=2 SV=1	At5g17780/4.0e-111/[R] KOG1454 Predicted hydrolase/acyltransferase (alpha/beta hydrolase superfamily)	isoform_27723/8.3e-22/alpha/beta hydrolase fold	cellular_component:GO:0016021//integral component of membrane;
isoform_278846		198	Sap-miR394a_2	CDL15	hypothetical protein	NA	0.064	OWM76213.1/7.9e-195/hypothetical protein CDL15_Pgr009859 [Punica granatum] >PKI76994.1 hypothetical protein CRG98_002497 [Punica granatum]	XM_010027007.2/0.0/XM_010027007.2 PREDICTED: Eucalyptus grandis F-box only protein 6 (LOC104415679), mRNA	sp|Q9FZK1|FBX6_ARATH/1.9e-134/F-box only protein 6 OS=Arabidopsis thaliana OX=3702 GN=FBX6 PE=2 SV=1	At1g27340/4.5e-134/[R] LSE0005 A F-box domain	isoform_278846/0.00012/Kelch motif	NA
isoform_279859		199	Sap-miR396a-5p	GNAS837-M21	Spirodela polyrhiza clone	NA	0.064	NA	AC254539.1/0.0/AC254539.1 Spirodela polyrhiza clone GNAS837-M21, complete sequence	NA	NA	NA	NA
isoform_280054	signaling transduction (hormone signaling)	200	Sap-nmiR22	IAA	auxin-responsive protein IAA	jcu:105647695/8.9e-81/auxin-responsive protein IAA16; K14484 auxin-responsive protein IAA	0.064	XP_012089266.1/6.5e-80/auxin-responsive protein IAA16 [Jatropha curcas] >KDP23667.1 hypothetical protein JCGZ_23500 [Jatropha curcas]	CP023132.1/0.0/CP023132.1 Lupinus angustiflorus cultivar Tanjil chromosome LG-20	sp|O24407|IAA16_ARATH/1.8e-71/Auxin-responsive protein IAA16 OS=Arabidopsis thaliana OX=3702 GN=IAA16 PE=1 SV=1	At3g04730/4.1e-71/[TR] LSE0302 A Auxin-inducible protein	isoform_280054/1.1e-82/AUX/IAA family	biological_process:GO:0006355//regulation of transcription, DNA-templated;GO:0009734//auxin-activated signaling pathway;cellular_component:GO:0005634//nucleus;
isoform_281646		201	Sap-miR396-3p, Sap-miR396a-5p, Sap-miR396b-3p	DDX46, PRP5	ATP-dependent RNA helicase DDX46/PRP5	ppp:112283510/2.3e-06/DEAD-box ATP-dependent RNA helicase 45-like; K12811 ATP-dependent RNA helicase DDX46/PRP5 [EC:3.6.4.13]	0.064	PRQ21300.1/4.4e-06/hypothetical protein RchiOBHm_Chr7g0237661 [Rosa chinensis]	FO082273.1/0.0/FO082273.1 Bathycoccus prasinos genomic : Chromosome_6	sp|F4IS91|RSA1_ARATH/9.2e-06/Protein SHORT ROOT IN SALT MEDIUM 1 OS=Arabidopsis thaliana OX=3702 GN=RSA1 PE=1 SV=1	CE04682/5.5e-06/[S] KOG3594 FOG: Cadherin repeats	isoform_281646/0.0055/Protein of unknown function (DUF4199)	NA
isoform_28168		202	Sap-miR169a-3p	M3KE1	MAP3K epsilon protein kinase 1	NA	0.129	XP_009351709.1/1.1e-220/PREDICTED: MAP3K epsilon protein kinase 1-like [Pyrus x bretschneideri]	XM_018864128.1/0.0/XM_018864128.1 PREDICTED: Eucalyptus grandis MAP3K epsilon protein kinase 1-like (LOC104421592), mRNA	sp|Q9LJD8|M3KE1_ARATH/3.1e-209/MAP3K epsilon protein kinase 1 OS=Arabidopsis thaliana OX=3702 GN=M3KE1 PE=1 SV=1	At3g13530/7.0e-209/[T] KOG0198 MEKK and related serine/threonine protein kinases	isoform_28168/0.075/Rix1 complex component involved in 60S ribosome maturation	molecular_function:GO:0005524//ATP binding;GO:0004672//protein kinase activity;
isoform_282339		203	Sap-miR394a_1, Sap-miR394a_2	CDL15	hypothetical protein	NA	0.064	OWM76213.1/7.7e-54/hypothetical protein CDL15_Pgr009859 [Punica granatum] >PKI76994.1 hypothetical protein CRG98_002497 [Punica granatum]	XM_021777589.1/0.0/XM_021777589.1 PREDICTED: Manihot esculenta F-box only protein 6-like (LOC110630218), transcript variant X2, mRNA	sp|Q9FZK1|FBX6_ARATH/2.3e-39/F-box only protein 6 OS=Arabidopsis thaliana OX=3702 GN=FBX6 PE=2 SV=1	At1g27340/5.2e-39/[R] LSE0005 A F-box domain	isoform_282339/2.1e-06/F-box domain	NA
isoform_283300	morphological adaption, signaling transduction (hormone signaling)	204	Sap-miR160a-5p, Sap-miR160h_1	K14486, ARF	auxin response factor; transcription factor	dcr:108223326/1.9e-62/auxin response factor 5-like; K14486 auxin response factor	0.064	OWM90198.1/9.5e-244/hypothetical protein CDL15_Pgr006519 [Punica granatum]	XR_001047087.2/0.0/XR_001047087.2 PREDICTED: Jatropha curcas auxin response factor 17 (LOC105638867), transcript variant X4, misc_RNA	sp|Q84WU6|ARFQ_ARATH/1.8e-143/Auxin response factor 17 OS=Arabidopsis thaliana OX=3702 GN=ARF17 PE=2 SV=1	At1g77850/9.2e-135/[TK] LSE0284 A Auxin response transcription factor	isoform_283300/2.1e-26/Auxin response factor	biological_process:GO:0006355//regulation of transcription, DNA-templated;GO:0009734//auxin-activated signaling pathway;cellular_component:GO:0005634//nucleus;molecular_function:GO:0003677//DNA binding;
isoform_283899		205	Sap-nmiR3	EXOC7, EXO70	exocyst complex component 7	mcha:111018684/2.2e-50/exocyst complex component EXO70A1-like; K07195 exocyst complex component 7	0.064	OWM87667.1/5.3e-64/hypothetical protein CDL15_Pgr022780 [Punica granatum]	NA	sp|Q9LZD3|E70A1_ARATH/4.7e-46/Exocyst complex component EXO70A1 OS=Arabidopsis thaliana OX=3702 GN=EXO70A1 PE=1 SV=1	At5g03540/1.1e-45/[U] KOG2344 Exocyst component protein and related proteins	NA	biological_process:GO:0015031//protein transport;GO:0006887//exocytosis;cellular_component:GO:0000145//exocyst;
isoform_284633	basic metabolism adaption	206	Sap-miR4995	FDA3, FDA7, FDA8, desB	acyl-lipid omega-3 desaturase	cpep:111787876/6.5e-06/omega-3 fatty acid desaturase, endoplasmic reticulum-like isoform X1; K10257 acyl-lipid omega-3 desaturase [EC:1.14.19.25 1.14.19.35 1.14.19.36]	0.064	XP_012857504.1/1.8e-52/PREDICTED: uncharacterized protein LOC105976789 [Erythranthe guttata]	KT459232.1/0.0/KT459232.1 Oenothera suffrutescens voucher Steele_1289 26S ribosomal RNA gene, partial sequence	sp|Q9FIC8|GL116_ARATH/2.9e-52/Germin-like protein subfamily 1 member 16 OS=Arabidopsis thaliana OX=3702 GN=At5g39130 PE=2 SV=1	At5g39190/6.6e-52/[V] LSE0346 A Germin/oxalate oxidase	isoform_284633/1.2e-23/Cupin	cellular_component:GO:0005576//extracellular region;molecular_function:GO:0045735//nutrient reservoir activity;GO:0030145//manganese ion binding;
isoform_2849	signaling transduction (hormone signaling)	207	Sap-miR166a, Sap-miR166h-3p	HD-ZIP	homeobox-leucine zipper protein; transcription factor	hbr:110637172/0.0e+00/homeobox-leucine zipper protein ATHB-8-like; K09338 homeobox-leucine zipper protein	0.258	OWM90942.1/0.0e+00/hypothetical protein CDL15_Pgr019254 [Punica granatum]	XM_021787147.1/0.0/XM_021787147.1 PREDICTED: Hevea brasiliensis homeobox-leucine zipper protein ATHB-8-like (LOC110637172), mRNA	sp|Q39123|ATHB8_ARATH/0.0e+00/Homeobox-leucine zipper protein ATHB-8 OS=Arabidopsis thaliana OX=3702 GN=ATHB-8 PE=1 SV=1	At4g32880/0.0e+00/[K] LSE0187 A Homeodomain protein, contains START domain	isoform_2849/5.6e-52/MEKHLA domain	cellular_component:GO:0005634//nucleus;molecular_function:GO:0008289//lipid binding;GO:0003677//DNA binding;
isoform_2854	signaling transduction (hormone signaling)	208	Sap-miR166a, Sap-miR166m	HD-ZIP	homeobox-leucine zipper protein; transcription factor	hbr:110637172/0.0e+00/homeobox-leucine zipper protein ATHB-8-like; K09338 homeobox-leucine zipper protein	0.837	OWM90942.1/0.0e+00/hypothetical protein CDL15_Pgr019254 [Punica granatum]	XM_002283681.4/0.0/XM_002283681.4 PREDICTED: Vitis vinifera homeobox-leucine zipper protein ATHB-15 (LOC100243970), mRNA	sp|Q39123|ATHB8_ARATH/0.0e+00/Homeobox-leucine zipper protein ATHB-8 OS=Arabidopsis thaliana OX=3702 GN=ATHB-8 PE=1 SV=1	At4g32880/0.0e+00/[K] LSE0187 A Homeodomain protein, contains START domain	isoform_2854/7.4e-52/MEKHLA domain	cellular_component:GO:0005634//nucleus;molecular_function:GO:0008289//lipid binding;GO:0003677//DNA binding;
isoform_285675	signaling transduction (hormone signaling)	209	Sap-miR169a-5p, Sap-miR169b-5p, Sap-miR169e, Sap-miR169h, Sap-miR169v	NFYA, HAP2	nuclear transcription factor Y, alpha; transcription factor	egr:104421514/2.0e-63/nuclear transcription factor Y subunit A-1; K08064 nuclear transcription factor Y, alpha	0.064	PKI42496.1/2.9e-79/hypothetical protein CRG98_037085 [Punica granatum]	XM_021736177.1/0.0/XM_021736177.1 PREDICTED: Manihot esculenta nuclear transcription factor Y subunit A-1-like (LOC110599666), transcript variant X4, mRNA	sp|Q9LXV5|NFYA1_ARATH/7.5e-45/Nuclear transcription factor Y subunit A-1 OS=Arabidopsis thaliana OX=3702 GN=NFYA1 PE=2 SV=1	At5g12840/1.7e-44/[K] KOG1561 CCAAT-binding factor, subunit B (HAP2)	isoform_285675/1.4e-28/CCAAT-binding transcription factor (CBF-B/NF-YA) subunit B	cellular_component:GO:0016602//CCAAT-binding factor complex;molecular_function:GO:0003677//DNA binding;GO:0003700//DNA-binding transcription factor activity;
isoform_286296	signaling transduction (hormone signaling)	210	Sap-miR169a-5p	NFYA, HAP2	nuclear transcription factor Y, alpha; transcription factor	egr:104421514/9.6e-42/nuclear transcription factor Y subunit A-1; K08064 nuclear transcription factor Y, alpha	0.064	PKI42496.1/6.1e-45/hypothetical protein CRG98_037085 [Punica granatum]	XM_021761373.1/0.0/XM_021761373.1 PREDICTED: Manihot esculenta nuclear transcription factor Y subunit A-1-like (LOC110618242), mRNA	sp|Q945M9|NFYA9_ARATH/4.6e-34/Nuclear transcription factor Y subunit A-9 OS=Arabidopsis thaliana OX=3702 GN=NFYA9 PE=1 SV=1	At3g20910/1.1e-33/[K] KOG1561 CCAAT-binding factor, subunit B (HAP2)	isoform_286296/2.6e-29/CCAAT-binding transcription factor (CBF-B/NF-YA) subunit B	cellular_component:GO:0016602//CCAAT-binding factor complex;molecular_function:GO:0003677//DNA binding;GO:0003700//DNA-binding transcription factor activity;
isoform_286726	morphological adaption	211	Sap-nmiR16	CESA	cellulose synthase A	hbr:110657869/9.1e-218/cellulose synthase A catalytic subunit 1 [UDP-forming]; K10999 cellulose synthase A [EC:2.4.1.12]	0.064	XP_021670977.1/6.7e-217/cellulose synthase A catalytic subunit 1 [UDP-forming] [Hevea brasiliensis]	KC204971.1/0.0/KC204971.1 Betula luminifera cellulose synthase 7 (CesA7) mRNA, complete cds	sp|A2Y0X2|CESA1_ORYSI/8.3e-209/Probable cellulose synthase A catalytic subunit 1 [UDP-forming] OS=Oryza sativa subsp. indica OX=39946 GN=CESA1 PE=3 SV=1	At4g32410/3.6e-207/[MG] LSE0129 A Cellulose synthase catalytic subunit	isoform_286726/2.2e-205/Cellulose synthase	biological_process:GO:0030244//cellulose biosynthetic process;GO:0071555//cell wall organization;cellular_component:GO:0016021//integral component of membrane;GO:0005886//plasma membrane;molecular_function:GO:0016760//cellulose synthase (UDP-forming) activity;GO:0046872//metal ion binding;
isoform_287284		212	Sap-miR8620	MYF6, MRF4	myogenic factor 6	vvi:100259155/3.9e-55/transcription factor bHLH96; K18485 myogenic factor 6	0.064	OWM65653.1/1.0e-96/hypothetical protein CDL15_Pgr017150 [Punica granatum] >PKI46772.1 hypothetical protein CRG98_032844 [Punica granatum]	XM_010928040.2/0.0/XM_010928040.2 PREDICTED: Elaeis guineensis transcription factor bHLH94-like (LOC105048652), mRNA	sp|Q9C7T4|BH096_ARATH/1.2e-51/Transcription factor bHLH96 OS=Arabidopsis thaliana OX=3702 GN=BHLH96 PE=1 SV=1	At1g72210/2.9e-51/[KT] LSE0107 A bHLH transcription factor	isoform_287284/7.4e-11/Helix-loop-helix DNA-binding domain	molecular_function:GO:0046983//protein dimerization activity;
isoform_287462		213	Sap-miR8620	psbQ	photosystem II oxygen-evolving enhancer protein 3	mus:103998883/2.0e-60/oxygen-evolving enhancer protein 3-1, chloroplastic-like; K08901 photosystem II oxygen-evolving enhancer protein 3	0.064	PPD97358.1/2.6e-59/hypothetical protein GOBAR_DD05618 [Gossypium barbadense]	KX641464.1/0.0/KX641464.1 Lagerstroemia indica mitochondrion, complete genome	sp|Q9XFT3|PSBQ1_ARATH/1.2e-55/Oxygen-evolving enhancer protein 3-1, chloroplastic OS=Arabidopsis thaliana OX=3702 GN=PSBQ1 PE=1 SV=3	At1g62763/1.9e-11/[R] LSE0026 A Ripening-related protein	isoform_287462/3e-15/Isochorismatase family	biological_process:GO:0015979//photosynthesis;cellular_component:GO:0019898//extrinsic component of membrane;GO:0016021//integral component of membrane;GO:0009654//photosystem II oxygen evolving complex;molecular_function:GO:0005509//calcium ion binding;GO:0004857//enzyme inhibitor activity;
isoform_287923		214	Sap-miR172b_2	Ccrd_019802	hypothetical protein	NA	0.064	KVI01919.1/6.9e-07/hypothetical protein Ccrd_019802 [Cynara cardunculus var. scolymus]	NA	NA	NA	NA	NA
isoform_2889	signaling transduction (hormone signaling)	215	Sap-miR166a	HD-ZIP	homeobox-leucine zipper protein; transcription factor	jcu:105636855/0.0e+00/homeobox-leucine zipper protein ATHB-14; K09338 homeobox-leucine zipper protein	0.193	PKI66297.1/0.0e+00/hypothetical protein CRG98_013323 [Punica granatum]	KJ451560.1/0.0/KJ451560.1 Betula luminifera class III HD-Zip protein HDZ1 (HDZ1) mRNA, complete cds	sp|Q6AST1|HOX32_ORYSJ/0.0e+00/Homeobox-leucine zipper protein HOX32 OS=Oryza sativa subsp. japonica OX=39947 GN=HOX32 PE=2 SV=1	At2g34710/0.0e+00/[K] LSE0187 A Homeodomain protein, contains START domain	isoform_2889/9e-51/START domain	cellular_component:GO:0005634//nucleus;molecular_function:GO:0008289//lipid binding;GO:0003677//DNA binding;
isoform_290365	signaling transduction (hormone signaling)	216	Sap-miR166, Sap-miR166e	HD-ZIP	homeobox-leucine zipper protein; transcription factor	egr:104449909/1.7e-121/homeobox-leucine zipper protein ATHB-15; K09338 homeobox-leucine zipper protein	0.064	OWM78111.1/2.5e-126/hypothetical protein CDL15_Pgr014930 [Punica granatum]	XM_010064216.2/0.0/XM_010064216.2 PREDICTED: Eucalyptus grandis homeobox-leucine zipper protein ATHB-15 (LOC104449909), mRNA	sp|Q9ZU11|ATB15_ARATH/4.7e-106/Homeobox-leucine zipper protein ATHB-15 OS=Arabidopsis thaliana OX=3702 GN=ATHB-15 PE=1 SV=1	At1g52150/1.1e-105/[K] LSE0187 A Homeodomain protein, contains START domain	NA	cellular_component:GO:0005634//nucleus;molecular_function:GO:0008289//lipid binding;GO:0003677//DNA binding;
isoform_290640		217	Sap-miR172b_2	NA	uncharacterized ncRNA	NA	0.064	NA	XR_002493122.1/0.0/XR_002493122.1 PREDICTED: Hevea brasiliensis uncharacterized LOC110646208 (LOC110646208), ncRNA	NA	NA	NA	NA
isoform_291412		218	Sap-miR396-3p	GNAS837-M21	Spirodela polyrhiza clone	NA	0.064	NA	AC254539.1/0.0/AC254539.1 Spirodela polyrhiza clone GNAS837-M21, complete sequence	NA	NA	NA	NA
isoform_293101	signaling transduction (MAPK signaling)	219	Sap-nmiR6	MPK1_2	mitogen-activated protein kinase 1/2	egr:104448786/6.4e-136/mitogen-activated protein kinase homolog NTF3; K20535 mitogen-activated protein kinase 1/2 [EC:2.7.11.24]	0.064	OWM75034.1/1.4e-139/hypothetical protein CDL15_Pgr021385 [Punica granatum] >PKI49639.1 hypothetical protein CRG98_029976 [Punica granatum]	XM_021428805.1/0.0/XM_021428805.1 PREDICTED: Herrania umbratica mitogen-activated protein kinase homolog NTF3 (LOC110416740), mRNA	sp|Q40517|NTF3_TOBAC/3.0e-131/Mitogen-activated protein kinase homolog NTF3 OS=Nicotiana tabacum OX=4097 GN=NTF3 PE=1 SV=1	At1g10210/5.4e-128/[T] KOG0660 Mitogen-activated protein kinase	isoform_293101/3.8e-50/Protein kinase domain	molecular_function:GO:0005524//ATP binding;GO:0004707//MAP kinase activity;
isoform_293548		220	Sap-miR172b_2	STRAP	serine-threonine kinase receptor-associated protein-like	NA	0.064	NA	XM_010547485.2/0.0/XM_010547485.2 PREDICTED: Tarenaya hassleriana serine-threonine kinase receptor-associated protein-like (LOC104818044), mRNA	NA	NA	NA	NA
isoform_294196			miR172e-3p_1	NA	uncharacterized protein LOC18599772 isoform X2	NA	0.064	NA	NA	NA	NA	NA	NA
isoform_295216	signaling transduction (hormone signaling)	221	Sap-miR172a_3, Sap-miR172e-3p	AP2	AP2-like factor, euAP2 lineage; transcription factor	pda:103711505/8.3e-82/AP2-like ethylene-responsive transcription factor TOE3 isoform X1; K09284 AP2-like factor, euAP2 lineage	0.064	AGM20666.1/3.2e-82/AP2-2 [Populus tomentosa]	XM_017779172.1/0.0/XM_017779172.1 PREDICTED: Gossypium arboreum floral homeotic protein APETALA 2-like (LOC108476820), transcript variant X5, mRNA	sp|P47927|AP2_ARATH/6.8e-66/Floral homeotic protein APETALA 2 OS=Arabidopsis thaliana OX=3702 GN=AP2 PE=1 SV=1	At4g36920/1.6e-65/[K] LSE0337 A Ovule development protein/AP2 domain transcription factor	isoform_295216/4.5e-10/AP2 domain	cellular_component:GO:0005634//nucleus;GO:0016021//integral component of membrane;molecular_function:GO:0003677//DNA binding;GO:0003700//DNA-binding transcription factor activity;
isoform_2986	signaling transduction (hormone signaling)	222	Sap-miR166e, Sap-miR166h-3p	HD-ZIP	homeobox-leucine zipper protein; transcription factor	hbr:110637172/0.0e+00/homeobox-leucine zipper protein ATHB-8-like; K09338 homeobox-leucine zipper protein	0.58	OWM90942.1/0.0e+00/hypothetical protein CDL15_Pgr019254 [Punica granatum]	XM_002283681.4/0.0/XM_002283681.4 PREDICTED: Vitis vinifera homeobox-leucine zipper protein ATHB-15 (LOC100243970), mRNA	sp|Q39123|ATHB8_ARATH/0.0e+00/Homeobox-leucine zipper protein ATHB-8 OS=Arabidopsis thaliana OX=3702 GN=ATHB-8 PE=1 SV=1	At4g32880/0.0e+00/[K] LSE0187 A Homeodomain protein, contains START domain	isoform_2986/7.4e-52/MEKHLA domain	cellular_component:GO:0005634//nucleus;molecular_function:GO:0008289//lipid binding;GO:0003677//DNA binding;
isoform_32607	signaling transduction (hormone signaling)	223	Sap-miR169a-5p, Sap-miR169e, Sap-miR169h, Sap-miR169v	NFYA, HAP2	nuclear transcription factor Y, alpha; transcription factor	egr:104421514/6.9e-64/nuclear transcription factor Y subunit A-1; K08064 nuclear transcription factor Y, alpha	0.129	PKI42496.1/1.0e-79/hypothetical protein CRG98_037085 [Punica granatum]	XM_021736177.1/0.0/XM_021736177.1 PREDICTED: Manihot esculenta nuclear transcription factor Y subunit A-1-like (LOC110599666), transcript variant X4, mRNA	sp|Q9LXV5|NFYA1_ARATH/4.5e-45/Nuclear transcription factor Y subunit A-1 OS=Arabidopsis thaliana OX=3702 GN=NFYA1 PE=2 SV=1	At5g12840/1.0e-44/[K] KOG1561 CCAAT-binding factor, subunit B (HAP2)	isoform_32607/1.4e-28/CCAAT-binding transcription factor (CBF-B/NF-YA) subunit B	cellular_component:GO:0016602//CCAAT-binding factor complex;molecular_function:GO:0003677//DNA binding;GO:0003700//DNA-binding transcription factor activity;
isoform_3289	signaling transduction (hormone signaling)	224	Sap-miR166h-3p, Sap-miR166m	HD-ZIP	homeobox-leucine zipper protein; transcription factor	mesc:110617693/1.9e-129/homeobox-leucine zipper protein ATHB-14-like; K09338 homeobox-leucine zipper protein	0.129	OWM63816.1/1.2e-129/hypothetical protein CDL15_Pgr006078 [Punica granatum]	KJ451560.1/0.0/KJ451560.1 Betula luminifera class III HD-Zip protein HDZ1 (HDZ1) mRNA, complete cds	sp|A2XK30|HOX32_ORYSI/2.5e-116/Homeobox-leucine zipper protein HOX32 OS=Oryza sativa subsp. indica OX=39946 GN=HOX32 PE=2 SV=1	At2g34710/4.6e-113/[K] LSE0187 A Homeodomain protein, contains START domain	isoform_3289/4.9e-06/START domain	cellular_component:GO:0005634//nucleus;molecular_function:GO:0008289//lipid binding;GO:0003677//DNA binding;
isoform_32927	morphological adaption, signaling transduction (hormone signaling)	225	Sap-miR164e	UBR4, ZUBR1	E3 ubiquitin-protein ligase UBR4	ats:109762802/8.6e-22/LOC109762802; auxin transport protein BIG; K10691 E3 ubiquitin-protein ligase UBR4 [EC:2.3.2.27]	0.129	PKI55003.1/8.5e-119/hypothetical protein CRG98_024603 [Punica granatum]	XM_018974521.1/0.0/XM_018974521.1 PREDICTED: Juglans regia GDSL esterase/lipase At5g45670-like (LOC108998072), mRNA	sp|Q8L5Z1|GDL17_ARATH/3.8e-100/GDSL esterase/lipase At1g33811 OS=Arabidopsis thaliana OX=3702 GN=At1g33811 PE=2 SV=1	At1g33810/8.6e-100/[RI] LSE0388 A Predicted lipase	isoform_32927/5e-11/GDSL-like Lipase/Acylhydrolase	molecular_function:GO:0016788//hydrolase activity, acting on ester bonds;
isoform_33078		226	Sap-miR319	Z-ISO	zeta-carotene isomerase	bna:106368192/4.6e-28/uncharacterized protein LOC106368192; K15744 zeta-carotene isomerase [EC:5.2.1.12]	0.773	OWM67906.1/6.0e-109/hypothetical protein CDL15_Pgr010844 [Punica granatum]	XM_007227491.2/0.0/XM_007227491.2 PREDICTED: Prunus persica uncharacterized LOC18790491 (LOC18790491), mRNA	NA	NA	isoform_33078/4.3e-15/Protein of unknown function (DUF3755)	molecular_function:GO:0003677//DNA binding;
isoform_3353	signaling transduction (hormone signaling)	227	Sap-miR166a-3p, Sap-miR166h-3p, Sap-miR166m	HD-ZIP	homeobox-leucine zipper protein; transcription factor	hbr:110637172/0.0e+00/homeobox-leucine zipper protein ATHB-8-like; K09338 homeobox-leucine zipper protein	0.258	OWM90942.1/0.0e+00/hypothetical protein CDL15_Pgr019254 [Punica granatum]	XM_021787147.1/0.0/XM_021787147.1 PREDICTED: Hevea brasiliensis homeobox-leucine zipper protein ATHB-8-like (LOC110637172), mRNA	sp|Q39123|ATHB8_ARATH/0.0e+00/Homeobox-leucine zipper protein ATHB-8 OS=Arabidopsis thaliana OX=3702 GN=ATHB-8 PE=1 SV=1	At4g32880/0.0e+00/[K] LSE0187 A Homeodomain protein, contains START domain	isoform_3353/5.6e-52/MEKHLA domain	cellular_component:GO:0005634//nucleus;molecular_function:GO:0008289//lipid binding;GO:0003677//DNA binding;
isoform_34004		228	Sap-miR396b-3p	NA	Lagerstroemia intermedia chloroplast	NA	0.129	XP_007029937.2/6.3e-53/PREDICTED: uncharacterized protein LOC18599772 isoform X2 [Theobroma cacao]	NA	sp|Q9FN79|BDG5_ARATH/2.6e-32/Probable lysophospholipase BODYGUARD 5 OS=Arabidopsis thaliana OX=3702 GN=BDG5 PE=3 SV=1	At5g17720/5.9e-32/[R] KOG1454 Predicted hydrolase/acyltransferase (alpha/beta hydrolase superfamily)	NA	cellular_component:GO:0016021//integral component of membrane;molecular_function:GO:0016787//hydrolase activity;
isoform_35271		229	Sap-miR319	Z-ISO	zeta-carotene isomerase	bna:106368192/1.0e-27/uncharacterized protein LOC106368192; K15744 zeta-carotene isomerase [EC:5.2.1.12]	0.515	OWM67906.1/2.7e-117/hypothetical protein CDL15_Pgr010844 [Punica granatum]	XM_019404008.1/0.0/XM_019404008.1 PREDICTED: Nicotiana attenuata uncharacterized LOC109237679 (LOC109237679), mRNA	NA	NA	isoform_35271/1e-16/Protein of unknown function (DUF3755)	NA
isoform_35714	signaling transduction (hormone signaling)	230	Sap-miR171, Sap-miR171a-3p, Sap-miR171b	DELLA	DELLA protein	gmx:100797336/3.0e-32/DELLA protein GAI1; K14494 DELLA protein	0.129	OWM64907.1/7.4e-189/hypothetical protein CDL15_Pgr028624 [Punica granatum]	XM_018964800.1/0.0/XM_018964800.1 PREDICTED: Juglans regia scarecrow-like protein 27 (LOC108990734), mRNA	sp|O81316|SCL6_ARATH/1.8e-107/Scarecrow-like protein 6 OS=Arabidopsis thaliana OX=3702 GN=SCL6 PE=1 SV=1	At4g00150/4.1e-107/[TK] LSE0487 A Gibberellin response modulator/Predicted transcription factor	isoform_35714/1.5e-90/GRAS domain family	NA
isoform_35743		231	Sap-miR396b	PSMC5, RPT6	26S proteasome regulatory subunit T6	nta:107785983/1.1e-61/RPT6; 26S protease regulatory subunit 8 homolog A-like; K03066 26S proteasome regulatory subunit T6	0.129	XP_018446150.1/3.5e-61/PREDICTED: 26S protease regulatory subunit 8 homolog A [Raphanus sativus]	XM_021788803.1/0.0/XM_021788803.1 PREDICTED: Hevea brasiliensis 26S proteasome regulatory subunit 8 homolog A-like (LOC110638295), transcript variant X2, mRNA	sp|Q9C5U3|PRS8A_ARATH/3.6e-63/26S proteasome regulatory subunit 8 homolog A OS=Arabidopsis thaliana OX=3702 GN=RPT6A PE=1 SV=1	At5g19990/8.2e-63/[O] KOG0728 26S proteasome regulatory complex, ATPase RPT6	isoform_35743/1.6e-11/ATPase family associated with various cellular activities (AAA)	biological_process:GO:0030163//protein catabolic process;cellular_component:GO:0000502//proteasome complex;GO:0005737//cytoplasm;molecular_function:GO:0016787//hydrolase activity;GO:0005524//ATP binding;
isoform_36206		232	Sap-miR396b	PSMC5, RPT6	26S proteasome regulatory subunit T6	cit:102610684/2.3e-202/26S proteasome regulatory subunit 8 homolog A; K03066 26S proteasome regulatory subunit T6	0.129	XP_006451010.1/1.7e-201/26S proteasome regulatory subunit 8 homolog A [Citrus clementina] >XP_006475777.1 26S proteasome regulatory subunit 8 homolog A [Citrus sinensis] >ESR64250.1 hypothetical protein CICLE_v10008422mg [Citrus clementina] >KDO80360.1 hypothetical protein CISIN_1g014743mg [Citrus sinensis] >GAY50543.1 hypothetical protein CUMW_127470 [Citrus unshiu]	XM_021788803.1/0.0/XM_021788803.1 PREDICTED: Hevea brasiliensis 26S proteasome regulatory subunit 8 homolog A-like (LOC110638295), transcript variant X2, mRNA	sp|Q9C5U3|PRS8A_ARATH/1.4e-197/26S proteasome regulatory subunit 8 homolog A OS=Arabidopsis thaliana OX=3702 GN=RPT6A PE=1 SV=1	At5g19990/3.0e-195/[O] KOG0728 26S proteasome regulatory complex, ATPase RPT6	isoform_36206/1.3e-43/ATPase family associated with various cellular activities (AAA)	biological_process:GO:0030163//protein catabolic process;cellular_component:GO:0005737//cytoplasm;molecular_function:GO:0016787//hydrolase activity;GO:0005524//ATP binding;
isoform_36514		233	Sap-miR396b	PSMC5, RPT6	26S proteasome regulatory subunit T6	cit:102610684/7.8e-227/26S proteasome regulatory subunit 8 homolog A; K03066 26S proteasome regulatory subunit T6	0.386	XP_006451010.1/5.7e-226/26S proteasome regulatory subunit 8 homolog A [Citrus clementina] >XP_006475777.1 26S proteasome regulatory subunit 8 homolog A [Citrus sinensis] >ESR64250.1 hypothetical protein CICLE_v10008422mg [Citrus clementina] >KDO80360.1 hypothetical protein CISIN_1g014743mg [Citrus sinensis] >GAY50543.1 hypothetical protein CUMW_127470 [Citrus unshiu]	XM_010051653.2/0.0/XM_010051653.2 PREDICTED: Eucalyptus grandis 26S protease regulatory subunit 8 homolog A (LOC104438493), mRNA	sp|Q9C5U3|PRS8A_ARATH/4.8e-222/26S proteasome regulatory subunit 8 homolog A OS=Arabidopsis thaliana OX=3702 GN=RPT6A PE=1 SV=1	At5g19990/1.0e-219/[O] KOG0728 26S proteasome regulatory complex, ATPase RPT6	isoform_36514/1.5e-43/ATPase family associated with various cellular activities (AAA)	biological_process:GO:0030163//protein catabolic process;cellular_component:GO:0005737//cytoplasm;molecular_function:GO:0016787//hydrolase activity;GO:0005524//ATP binding;
isoform_3681	morphological adaption, signaling transduction (hormone signaling)	234	Sap-miR160a-5p	K14486, ARF	auxin response factor; transcription factor	jcu:105638003/1.4e-76/auxin response factor 19 isoform X1; K14486 auxin response factor	0.193	PKI51963.1/8.4e-293/hypothetical protein CRG98_027615 [Punica granatum]	XM_009398698.2/0.0/XM_009398698.2 PREDICTED: Musa acuminata subsp. malaccensis auxin response factor 18-like (LOC103981930), mRNA	sp|Q653H7|ARFR_ORYSJ/1.1e-180/Auxin response factor 18 OS=Oryza sativa subsp. japonica OX=39947 GN=ARF18 PE=2 SV=1	At2g28350/1.0e-178/[TK] LSE0284 A Auxin response transcription factor	isoform_3681/4e-31/Auxin response factor	biological_process:GO:0006355//regulation of transcription, DNA-templated;GO:0009734//auxin-activated signaling pathway;cellular_component:GO:0005634//nucleus;molecular_function:GO:0003677//DNA binding;
isoform_36846	signaling transduction (hormone signaling)	235	Sap-miR169d-5p	NFYA, HAP2	nuclear transcription factor Y, alpha; transcription factor	pper:18770097/1.8e-47/nuclear transcription factor Y subunit A-10; K08064 nuclear transcription factor Y, alpha	0.773	PKI42965.1/2.2e-89/hypothetical protein CRG98_036763 [Punica granatum]	NA	sp|Q8LFU0|NFYAA_ARATH/2.1e-33/Nuclear transcription factor Y subunit A-10 OS=Arabidopsis thaliana OX=3702 GN=NFYA10 PE=2 SV=2	At5g06510/4.8e-33/[K] KOG1561 CCAAT-binding factor, subunit B (HAP2)	isoform_36846/3.1e-24/CCAAT-binding transcription factor (CBF-B/NF-YA) subunit B	molecular_function:GO:0003700//DNA-binding transcription factor activity;
isoform_36896	signaling transduction (hormone signaling)	236	Sap-miR169a-5p, Sap-miR169d-5p	NFYA, HAP2	nuclear transcription factor Y, alpha; transcription factor	cit:102628969/5.6e-31/nuclear transcription factor Y subunit A-1; K08064 nuclear transcription factor Y, alpha	0.129	XP_027334272.1/2.2e-31/nuclear transcription factor Y subunit A-1 isoform X1 [Abrus precatorius] >XP_027334273.1 nuclear transcription factor Y subunit A-1 isoform X1 [Abrus precatorius] >XP_027334274.1 nuclear transcription factor Y subunit A-1 isoform X1 [Abrus precatorius]	XM_010675343.2/0.0/XM_010675343.2 PREDICTED: Beta vulgaris subsp. vulgaris nuclear transcription factor Y subunit A-1 (LOC104889991), mRNA	sp|Q945M9|NFYA9_ARATH/3.4e-18/Nuclear transcription factor Y subunit A-9 OS=Arabidopsis thaliana OX=3702 GN=NFYA9 PE=1 SV=1	At3g20910/7.8e-18/[K] KOG1561 CCAAT-binding factor, subunit B (HAP2)	NA	cellular_component:GO:0016602//CCAAT-binding factor complex;molecular_function:GO:0003677//DNA binding;GO:0003700//DNA-binding transcription factor activity;
isoform_3703		237	Sap-nmiR10	MUC19	mucin-19	han:110926720/3.7e-42/uncharacterized protein LOC110926720; K22020 mucin-19	0.129	KRH17852.1/2.7e-158/hypothetical protein GLYMA_13G021700, partial [Glycine max]	AF479240.1/0.0/AF479240.1 Lythrum salicaria 26S ribosomal RNA gene, complete sequence	NA	Hs22053937/1.0e-08/[R] KOG1721 FOG: Zn-finger	NA	NA
isoform_38105		238	Sap-miR319	Z-ISO	zeta-carotene isomerase	bna:106368192/9.8e-28/uncharacterized protein LOC106368192; K15744 zeta-carotene isomerase [EC:5.2.1.12]	0.386	OWM67906.1/2.6e-117/hypothetical protein CDL15_Pgr010844 [Punica granatum]	XM_019404008.1/0.0/XM_019404008.1 PREDICTED: Nicotiana attenuata uncharacterized LOC109237679 (LOC109237679), mRNA	NA	NA	isoform_38105/1e-16/Protein of unknown function (DUF3755)	NA
isoform_3837	signaling transduction (hormone signaling)	239	Sap-miR166e, Sap-miR166h-3p, Sap-miR166m	HD-ZIP	homeobox-leucine zipper protein; transcription factor	rcu:8266275/0.0e+00/homeobox-leucine zipper protein REVOLUTA; K09338 homeobox-leucine zipper protein	0.129	PKI63850.1/0.0e+00/hypothetical protein CRG98_015733 [Punica granatum]	XM_010045451.2/0.0/XM_010045451.2 PREDICTED: Eucalyptus grandis homeobox-leucine zipper protein REVOLUTA (LOC104432880), mRNA	sp|Q9SE43|REV_ARATH/0.0e+00/Homeobox-leucine zipper protein REVOLUTA OS=Arabidopsis thaliana OX=3702 GN=REV PE=1 SV=2	At5g60690/0.0e+00/[K] LSE0187 A Homeodomain protein, contains START domain	isoform_3837/1.5e-48/MEKHLA domain	cellular_component:GO:0005634//nucleus;molecular_function:GO:0008289//lipid binding;GO:0003677//DNA binding;
isoform_3838	signaling transduction (hormone signaling)	240	Sap-miR166a-3p, Sap-miR166e, Sap-miR166h-3p, Sap-miR166m	HD-ZIP	homeobox-leucine zipper protein; transcription factor	jcu:105636855/0.0e+00/homeobox-leucine zipper protein ATHB-14; K09338 homeobox-leucine zipper protein	0.58	PKI66297.1/0.0e+00/hypothetical protein CRG98_013323 [Punica granatum]	KJ451560.1/0.0/KJ451560.1 Betula luminifera class III HD-Zip protein HDZ1 (HDZ1) mRNA, complete cds	sp|Q6AST1|HOX32_ORYSJ/0.0e+00/Homeobox-leucine zipper protein HOX32 OS=Oryza sativa subsp. japonica OX=39947 GN=HOX32 PE=2 SV=1	At2g34710/0.0e+00/[K] LSE0187 A Homeodomain protein, contains START domain	isoform_3838/9e-51/START domain	cellular_component:GO:0005634//nucleus;molecular_function:GO:0008289//lipid binding;GO:0003677//DNA binding;
isoform_39543	signaling transduction (MAPK signaling)	241	Sap-miR164e	Cap	UDP-glucuronate 4-epimerase	egr:104420918/1.6e-192/UXS1; UDP-glucuronic acid decarboxylase 1; K08678 UDP-glucuronate decarboxylase [EC:4.1.1.35]	0.193	OWM87519.1/2.8e-193/hypothetical protein CDL15_Pgr022630 [Punica granatum]	NM_001302714.1/0.0/NM_001302714.1 Eucalyptus grandis UDP-glucuronate decarboxylase 1 (UXS1), mRNA >EU737108.1 Eucalyptus grandis UDP-D-glucuronate carboxy-lyase (UXS1) mRNA, complete cds	sp|Q9ZV36|UXS6_ARATH/6.0e-182/UDP-glucuronic acid decarboxylase 6 OS=Arabidopsis thaliana OX=3702 GN=UXS6 PE=2 SV=1	At2g28760/1.4e-181/[GM] KOG1429 dTDP-glucose 4-6-dehydratase/UDP-glucuronic acid decarboxylase	isoform_39543/2.2e-53/GDP-mannose 4,6 dehydratase	molecular_function:GO:0048040//UDP-glucuronate decarboxylase activity;
isoform_39759	signaling transduction (hormone signaling)	242	Sap-miR169a-5p, Sap-miR169b-5p, Sap-miR169d-5p, Sap-miR169e, Sap-miR169h, Sap-miR169v	NFYA, HAP2	nuclear transcription factor Y, alpha; transcription factor	cam:101504175/3.9e-82/nuclear transcription factor Y subunit A-1; K08064 nuclear transcription factor Y, alpha	0.386	PKI42496.1/1.0e-86/hypothetical protein CRG98_037085 [Punica granatum]	XM_021736177.1/0.0/XM_021736177.1 PREDICTED: Manihot esculenta nuclear transcription factor Y subunit A-1-like (LOC110599666), transcript variant X4, mRNA	sp|Q9LXV5|NFYA1_ARATH/2.2e-51/Nuclear transcription factor Y subunit A-1 OS=Arabidopsis thaliana OX=3702 GN=NFYA1 PE=2 SV=1	At5g12840/5.1e-51/[K] KOG1561 CCAAT-binding factor, subunit B (HAP2)	isoform_39759/3.6e-28/CCAAT-binding transcription factor (CBF-B/NF-YA) subunit B	cellular_component:GO:0016602//CCAAT-binding factor complex;molecular_function:GO:0003677//DNA binding;GO:0003700//DNA-binding transcription factor activity;
isoform_40023	signaling transduction (hormone signaling)	243	Sap-miR171, Sap-miR171a-3p	DELLA	DELLA protein	gmx:100797336/2.8e-32/DELLA protein GAI1; K14494 DELLA protein	0.322	OWM64907.1/7.0e-189/hypothetical protein CDL15_Pgr028624 [Punica granatum]	XM_018964800.1/0.0/XM_018964800.1 PREDICTED: Juglans regia scarecrow-like protein 27 (LOC108990734), mRNA	sp|O81316|SCL6_ARATH/1.7e-107/Scarecrow-like protein 6 OS=Arabidopsis thaliana OX=3702 GN=SCL6 PE=1 SV=1	At4g00150/3.8e-107/[TK] LSE0487 A Gibberellin response modulator/Predicted transcription factor	isoform_40023/1.5e-90/GRAS domain family	NA
isoform_40668	signaling transduction (hormone signaling)	244	Sap-miR169a-5p, Sap-miR169b-5p, Sap-miR169d-5p, Sap-miR169e, Sap-miR169h, Sap-miR169v	NFYA, HAP2	nuclear transcription factor Y, alpha; transcription factor	cam:101504175/3.8e-82/nuclear transcription factor Y subunit A-1; K08064 nuclear transcription factor Y, alpha	0.386	PKI42496.1/9.9e-87/hypothetical protein CRG98_037085 [Punica granatum]	XM_021736177.1/0.0/XM_021736177.1 PREDICTED: Manihot esculenta nuclear transcription factor Y subunit A-1-like (LOC110599666), transcript variant X4, mRNA	sp|Q9LXV5|NFYA1_ARATH/2.2e-51/Nuclear transcription factor Y subunit A-1 OS=Arabidopsis thaliana OX=3702 GN=NFYA1 PE=2 SV=1	At5g12840/5.0e-51/[K] KOG1561 CCAAT-binding factor, subunit B (HAP2)	isoform_40668/3.6e-28/CCAAT-binding transcription factor (CBF-B/NF-YA) subunit B	cellular_component:GO:0016602//CCAAT-binding factor complex;molecular_function:GO:0003677//DNA binding;GO:0003700//DNA-binding transcription factor activity;
isoform_40730	morphological adaption, signaling transduction (hormone signaling)	245	Sap-miR164e	UBR4, ZUBR1	E3 ubiquitin-protein ligase UBR4	ats:109762802/9.5e-41/LOC109762802; auxin transport protein BIG; K10691 E3 ubiquitin-protein ligase UBR4 [EC:2.3.2.27]	0.129	PKI55003.1/5.5e-178/hypothetical protein CRG98_024603 [Punica granatum]	XM_018974521.1/0.0/XM_018974521.1 PREDICTED: Juglans regia GDSL esterase/lipase At5g45670-like (LOC108998072), mRNA	sp|Q8L5Z1|GDL17_ARATH/3.5e-150/GDSL esterase/lipase At1g33811 OS=Arabidopsis thaliana OX=3702 GN=At1g33811 PE=2 SV=1	At1g33810/7.5e-148/[RI] LSE0388 A Predicted lipase	isoform_40730/7.2e-19/GDSL-like Lipase/Acylhydrolase	molecular_function:GO:0016788//hydrolase activity, acting on ester bonds;
isoform_41640		246	Sap-miR4995	purC	phosphoribosylaminoimidazole-succinocarboxamide synthase	egr:104448005/2.2e-21/phosphoribosylaminoimidazole-succinocarboxamide synthase, chloroplastic; K01923 phosphoribosylaminoimidazole-succinocarboxamide synthase [EC:6.3.2.6]	0.129	XP_024444144.1/1.3e-22/phosphoribosylaminoimidazole-succinocarboxamide synthase, chloroplastic [Populus trichocarpa] >PNS95331.1 hypothetical protein POPTR_017G051500 [Populus trichocarpa] >PNS95332.1 hypothetical protein POPTR_017G051500 [Populus trichocarpa] >PNS95333.1 hypothetical protein POPTR_017G051500 [Populus trichocarpa]	XM_010061768.2/0.0/XM_010061768.2 PREDICTED: Eucalyptus grandis phosphoribosylaminoimidazole-succinocarboxamide synthase, chloroplastic (LOC104448005), mRNA	sp|P38025|PUR7_ARATH/2.5e-15/Phosphoribosylaminoimidazole-succinocarboxamide synthase, chloroplastic OS=Arabidopsis thaliana OX=3702 GN=PUR7 PE=2 SV=2	At3g21110/5.8e-15/[F] KOG2835 Phosphoribosylamidoimidazole-succinocarboxamide synthase	NA	biological_process:GO:0009733//response to auxin;GO:0006164//purine nucleotide biosynthetic process;GO:0006189//'de novo' IMP biosynthetic process;cellular_component:GO:0009570//chloroplast stroma;GO:0009507//chloroplast;molecular_function:GO:0004639//phosphoribosylaminoimidazolesuccinocarboxamide synthase activity;
isoform_4178	signaling transduction (hormone signaling)	247	Sap-miR171, Sap-miR171a-3p, Sap-miR171b	DELLA	DELLA protein	cqi:110729111/5.4e-30/DELLA protein GAI1-like; K14494 DELLA protein	0.322	OWM64907.1/0.0e+00/hypothetical protein CDL15_Pgr028624 [Punica granatum]	XM_018964800.1/0.0/XM_018964800.1 PREDICTED: Juglans regia scarecrow-like protein 27 (LOC108990734), mRNA	sp|O81316|SCL6_ARATH/1.0e-111/Scarecrow-like protein 6 OS=Arabidopsis thaliana OX=3702 GN=SCL6 PE=1 SV=1	At4g00150/2.4e-111/[TK] LSE0487 A Gibberellin response modulator/Predicted transcription factor	isoform_4178/6.5e-88/GRAS domain family	NA
isoform_4214	signaling transduction (hormone signaling)	248	Sap-miR166a-3p, Sap-miR166c, Sap-miR166e, Sap-miR166h-3p, Sap-miR166m	HD-ZIP	homeobox-leucine zipper protein; transcription factor	hbr:110637172/0.0e+00/homeobox-leucine zipper protein ATHB-8-like; K09338 homeobox-leucine zipper protein	0.258	OWM90942.1/0.0e+00/hypothetical protein CDL15_Pgr019254 [Punica granatum]	XM_002283681.4/0.0/XM_002283681.4 PREDICTED: Vitis vinifera homeobox-leucine zipper protein ATHB-15 (LOC100243970), mRNA	sp|Q39123|ATHB8_ARATH/0.0e+00/Homeobox-leucine zipper protein ATHB-8 OS=Arabidopsis thaliana OX=3702 GN=ATHB-8 PE=1 SV=1	At4g32880/0.0e+00/[K] LSE0187 A Homeodomain protein, contains START domain	isoform_4214/7.4e-52/MEKHLA domain	cellular_component:GO:0005634//nucleus;molecular_function:GO:0008289//lipid binding;GO:0003677//DNA binding;
isoform_42703	signaling transduction (hormone signaling)	249	Sap-miR171, Sap-miR171a-3p, Sap-miR171b	DELLA	DELLA protein	gmx:100797336/2.7e-32/DELLA protein GAI1; K14494 DELLA protein	0.129	OWM64907.1/6.7e-189/hypothetical protein CDL15_Pgr028624 [Punica granatum]	XM_018964800.1/0.0/XM_018964800.1 PREDICTED: Juglans regia scarecrow-like protein 27 (LOC108990734), mRNA	sp|O81316|SCL6_ARATH/1.6e-107/Scarecrow-like protein 6 OS=Arabidopsis thaliana OX=3702 GN=SCL6 PE=1 SV=1	At4g00150/3.7e-107/[TK] LSE0487 A Gibberellin response modulator/Predicted transcription factor	isoform_42703/1.5e-90/GRAS domain family	NA
isoform_43362		250	Sap-miR164e	UXS1, uxs	UDP-glucuronate decarboxylase	egr:104420918/1.5e-192/UXS1; UDP-glucuronic acid decarboxylase 1; K08678 UDP-glucuronate decarboxylase [EC:4.1.1.35]	0.451	OWM87519.1/2.6e-193/hypothetical protein CDL15_Pgr022630 [Punica granatum]	NM_001302714.1/0.0/NM_001302714.1 Eucalyptus grandis UDP-glucuronate decarboxylase 1 (UXS1), mRNA >EU737108.1 Eucalyptus grandis UDP-D-glucuronate carboxy-lyase (UXS1) mRNA, complete cds	sp|Q9ZV36|UXS6_ARATH/5.8e-182/UDP-glucuronic acid decarboxylase 6 OS=Arabidopsis thaliana OX=3702 GN=UXS6 PE=2 SV=1	At2g28760/1.3e-181/[GM] KOG1429 dTDP-glucose 4-6-dehydratase/UDP-glucuronic acid decarboxylase	isoform_43362/2.2e-53/GDP-mannose 4,6 dehydratase	molecular_function:GO:0048040//UDP-glucuronate decarboxylase activity;
isoform_43603	basic metabolism adaption	251	Sap-miR8620	ELF2C, AGO	eukaryotic translation initiation factor 2C	cre:CHLREDRAFT_18730/7.9e-08/AGO3; argonaute-like protein; K11593 eukaryotic translation initiation factor 2C	0.129	OWM85435.1/1.5e-60/hypothetical protein CDL15_Pgr019059 [Punica granatum] >PKI42075.1 hypothetical protein CRG98_037528 [Punica granatum]	GU814015.1/0.0/GU814015.1 Chlamydomonas reinhardtii strain CC-2290 NIC7m (NIC7m), SPS1m (SPS1m), SPP1Cm (SPP1Cm), EIF5Bbm (EIF5Bbm), PTC1m (PTC1m), 182394m (182394m), 97782m (97782m), RFC4m (RFC4m), 182392m (182392m), ALB3m (ALB3m), PSF2m (PSF2m), 182390m (182390m), 182389m (182389m), 294687m (294687m), HDH1m (HDH1m), TOC34m (TOC34m), 522875m (522875m), LPS1m (LPS1m), PDK1m (PDK1m), CGL70m (CGL70…	sp|Q9ZQ47|GRDP1_ARATH/7.4e-12/Glycine-rich domain-containing protein 1 OS=Arabidopsis thaliana OX=3702 GN=GRDP1 PE=2 SV=1	CE09029/5.8e-12/[T] LSE0519 C GROUND domains (extracellular cysteine-containing domain sometimes associated with HOG domains)	NA	NA
isoform_44057	morphological adaption, signaling transduction (hormone signaling)	252	Sap-miR164e	UBR4, ZUBR1	E3 ubiquitin-protein ligase UBR4	ats:109762802/9.0e-41/LOC109762802; auxin transport protein BIG; K10691 E3 ubiquitin-protein ligase UBR4 [EC:2.3.2.27]	0.129	PKI55003.1/5.2e-178/hypothetical protein CRG98_024603 [Punica granatum]	XM_018974521.1/0.0/XM_018974521.1 PREDICTED: Juglans regia GDSL esterase/lipase At5g45670-like (LOC108998072), mRNA	sp|Q8L5Z1|GDL17_ARATH/3.3e-150/GDSL esterase/lipase At1g33811 OS=Arabidopsis thaliana OX=3702 GN=At1g33811 PE=2 SV=1	At1g33810/7.1e-148/[RI] LSE0388 A Predicted lipase	isoform_44057/7.2e-19/GDSL-like Lipase/Acylhydrolase	molecular_function:GO:0016788//hydrolase activity, acting on ester bonds;
isoform_44135	signaling transduction (hormone signaling)	253	Sap-miR169d-5p	NFYA, HAP2	nuclear transcription factor Y, alpha; transcription factor	rcu:8272511/8.9e-36/nuclear transcription factor Y subunit A-3 isoform X2; K08064 nuclear transcription factor Y, alpha	0.129	OWM83066.1/4.2e-58/hypothetical protein CDL15_Pgr011748 [Punica granatum]	NA	sp|Q93ZH2|NFYA3_ARATH/2.8e-11/Nuclear transcription factor Y subunit A-3 OS=Arabidopsis thaliana OX=3702 GN=NFYA3 PE=2 SV=2	At1g72830/6.3e-11/[K] KOG1561 CCAAT-binding factor, subunit B (HAP2)	NA	cellular_component:GO:0016602//CCAAT-binding factor complex;molecular_function:GO:0003677//DNA binding;GO:0003700//DNA-binding transcription factor activity;
isoform_4530	morphological adaption, signaling transduction (hormone signaling)	254	Sap-miR160h_1	K14486, ARF	auxin response factor; transcription factor	cam:101492112/8.7e-73/auxin response factor 1; K14486 auxin response factor	0.193	PKI68138.1/0.0e+00/hypothetical protein CRG98_011437 [Punica granatum]	XM_010266365.2/0.0/XM_010266365.2 PREDICTED: Nelumbo nucifera auxin response factor 18-like (LOC104602613), mRNA	sp|Q653H7|ARFR_ORYSJ/2.0e-224/Auxin response factor 18 OS=Oryza sativa subsp. japonica OX=39947 GN=ARF18 PE=2 SV=1	At2g28350/3.1e-209/[TK] LSE0284 A Auxin response transcription factor	isoform_4530/1.5e-31/Auxin response factor	biological_process:GO:0006355//regulation of transcription, DNA-templated;GO:0009734//auxin-activated signaling pathway;cellular_component:GO:0005634//nucleus;molecular_function:GO:0003677//DNA binding;
isoform_47799		255	Sap-miR8620	MYF6, MRF4	myogenic factor 6	vvi:100259155/1.9e-64/transcription factor bHLH96; K18485 myogenic factor 6	0.322	OWM65653.1/5.7e-110/hypothetical protein CDL15_Pgr017150 [Punica granatum] >PKI46772.1 hypothetical protein CRG98_032844 [Punica granatum]	XM_010928040.2/0.0/XM_010928040.2 PREDICTED: Elaeis guineensis transcription factor bHLH94-like (LOC105048652), mRNA	sp|Q9C7T4|BH096_ARATH/1.3e-58/Transcription factor bHLH96 OS=Arabidopsis thaliana OX=3702 GN=BHLH96 PE=1 SV=1	At1g72210/2.9e-58/[KT] LSE0107 A bHLH transcription factor	isoform_47799/7.3e-11/Helix-loop-helix DNA-binding domain	molecular_function:GO:0046983//protein dimerization activity;
isoform_51977	signaling transduction (hormone signaling)	256	Sap-miR169b-5p	NFYA, HAP2	nuclear transcription factor Y, alpha; transcription factor	egr:104454653/1.2e-49/nuclear transcription factor Y subunit A-9; K08064 nuclear transcription factor Y, alpha	0.193	PKI31904.1/3.6e-74/hypothetical protein CRG98_047714 [Punica granatum]	XM_020378492.1/0.0/XM_020378492.1 PREDICTED: Cajanus cajan nuclear transcription factor Y subunit A-1-like (LOC109814052), transcript variant X2, mRNA	sp|Q945M9|NFYA9_ARATH/1.0e-30/Nuclear transcription factor Y subunit A-9 OS=Arabidopsis thaliana OX=3702 GN=NFYA9 PE=1 SV=1	At3g20910/2.4e-30/[K] KOG1561 CCAAT-binding factor, subunit B (HAP2)	isoform_51977/2.7e-29/CCAAT-binding transcription factor (CBF-B/NF-YA) subunit B	cellular_component:GO:0016602//CCAAT-binding factor complex;molecular_function:GO:0003677//DNA binding;GO:0003700//DNA-binding transcription factor activity;
isoform_53080		257	Sap-miR394a_1, Sap-miR394a_2	BRF1, GTF3B	transcription factor IIIB 90 kDa subunit	smo:SELMODRAFT_412683/1.8e-08/hypothetical protein; K15196 transcription factor IIIB 90 kDa subunit	0.193	OWM76213.1/2.0e-117/hypothetical protein CDL15_Pgr009859 [Punica granatum] >PKI76994.1 hypothetical protein CRG98_002497 [Punica granatum]	XM_010027007.2/0.0/XM_010027007.2 PREDICTED: Eucalyptus grandis F-box only protein 6 (LOC104415679), mRNA	sp|Q9FZK1|FBX6_ARATH/5.5e-93/F-box only protein 6 OS=Arabidopsis thaliana OX=3702 GN=FBX6 PE=2 SV=1	At1g27340/1.3e-92/[R] LSE0005 A F-box domain	isoform_53080/0.00034/Galactose oxidase, central domain	NA
isoform_53698		258	Sap-miR8620	MYF6, MRF4	myogenic factor 6	vvi:100259155/1.7e-64/transcription factor bHLH96; K18485 myogenic factor 6	0.193	OWM65653.1/5.1e-110/hypothetical protein CDL15_Pgr017150 [Punica granatum] >PKI46772.1 hypothetical protein CRG98_032844 [Punica granatum]	XM_010928040.2/0.0/XM_010928040.2 PREDICTED: Elaeis guineensis transcription factor bHLH94-like (LOC105048652), mRNA	sp|Q9C7T4|BH096_ARATH/1.1e-58/Transcription factor bHLH96 OS=Arabidopsis thaliana OX=3702 GN=BHLH96 PE=1 SV=1	At1g72210/2.6e-58/[KT] LSE0107 A bHLH transcription factor	isoform_53698/7.3e-11/Helix-loop-helix DNA-binding domain	molecular_function:GO:0046983//protein dimerization activity;
isoform_5467	morphological adaption, signaling transduction (hormone signaling)	259	Sap-miR160a-5p, Sap-miR160h_1	K14486, ARF	auxin response factor; transcription factor	cann:107878007/6.0e-76/auxin response factor 19-like; K14486 auxin response factor	1.674	OWM70195.1/0.0e+00/hypothetical protein CDL15_Pgr026045 [Punica granatum] >PKI56368.1 hypothetical protein CRG98_023253 [Punica granatum]	CP019095.1/0.0/CP019095.1 Spirodela polyrhiza strain 9509 chromosome 3 sequence	sp|Q93YR9|ARFP_ARATH/2.9e-214/Auxin response factor 16 OS=Arabidopsis thaliana OX=3702 GN=ARF16 PE=1 SV=1	At4g30080/4.2e-208/[TK] LSE0284 A Auxin response transcription factor	isoform_5467/2.1e-31/Auxin response factor	biological_process:GO:0006355//regulation of transcription, DNA-templated;GO:0009734//auxin-activated signaling pathway;cellular_component:GO:0005634//nucleus;molecular_function:GO:0003677//DNA binding;
isoform_55572		260	Sap-miR8051-5p	psbM	photosystem II PsbM protein	jre:26380874/8.7e-10/psbM, AT063_gp072; photosystem II protein M; K02714 photosystem II PsbM protein	2.898	YP_009524842.1/2.0e-31/photosystem II protein M (chloroplast) [Malus yunnanensis] >AXR91300.1 photosystem II protein M (chloroplast) [Malus yunnanensis] >AXR91384.1 photosystem II protein M (chloroplast) [Malus yunnanensis] >AXR91467.1 photosystem II protein M (chloroplast) [Malus yunnanensis] >AXR91553.1 photosystem II protein M (chloroplast) [Malus yunnanensis]	KX852427.1/0.0/KX852427.1 Lagerstroemia intermedia chloroplast, complete genome	sp|Q06FW7|PSBM_PELHO/3.8e-11/Photosystem II reaction center protein M OS=Pelargonium hortorum OX=4031 GN=psbM PE=3 SV=1	NA	NA	biological_process:GO:0019684//photosynthesis, light reaction;cellular_component:GO:0009535//chloroplast thylakoid membrane;GO:0009523//photosystem II;GO:0016021//integral component of membrane;
isoform_63105		261	Sap-miR8051-5p	psbM	photosystem II PsbM protein	jre:26380874/7.8e-10/psbM, AT063_gp072; photosystem II protein M; K02714 photosystem II PsbM protein	0.193	KJB80637.1/1.7e-13/hypothetical protein B456_013G108100 [Gossypium raimondii]	KX852427.1/0.0/KX852427.1 Lagerstroemia intermedia chloroplast, complete genome	sp|Q06FW7|PSBM_PELHO/3.4e-11/Photosystem II reaction center protein M OS=Pelargonium hortorum OX=4031 GN=psbM PE=3 SV=1	NA	NA	biological_process:GO:0019684//photosynthesis, light reaction;cellular_component:GO:0009535//chloroplast thylakoid membrane;GO:0009523//photosystem II;GO:0016021//integral component of membrane;
isoform_6363	morphological adaption, signaling transduction (hormone signaling)	262	Sap-miR160b	K14486, ARF	auxin response factor; transcription factor	var:108338397/7.3e-74/auxin response factor 5; K14486 auxin response factor	0.129	OWM68902.1/1.3e-305/hypothetical protein CDL15_Pgr025089 [Punica granatum]	XM_018826660.1/0.0/XM_018826660.1 PREDICTED: Musa acuminata subsp. malaccensis auxin response factor 18-like (LOC103983875), transcript variant X7, mRNA	sp|Q9SKN5|ARFJ_ARATH/1.7e-201/Auxin response factor 10 OS=Arabidopsis thaliana OX=3702 GN=ARF10 PE=2 SV=1	At2g28350/3.8e-201/[TK] LSE0284 A Auxin response transcription factor	isoform_6363/1.9e-32/Auxin response factor	biological_process:GO:0006355//regulation of transcription, DNA-templated;GO:0009734//auxin-activated signaling pathway;cellular_component:GO:0005634//nucleus;molecular_function:GO:0003677//DNA binding;
isoform_6400	morphological adaption, signaling transduction (hormone signaling)	263	Sap-miR160b	K14486, ARF	auxin response factor; transcription factor	var:108338397/7.2e-74/auxin response factor 5; K14486 auxin response factor	0.644	OWM68902.1/1.3e-305/hypothetical protein CDL15_Pgr025089 [Punica granatum]	XM_018826660.1/0.0/XM_018826660.1 PREDICTED: Musa acuminata subsp. malaccensis auxin response factor 18-like (LOC103983875), transcript variant X7, mRNA	sp|Q9SKN5|ARFJ_ARATH/1.7e-201/Auxin response factor 10 OS=Arabidopsis thaliana OX=3702 GN=ARF10 PE=2 SV=1	At2g28350/3.8e-201/[TK] LSE0284 A Auxin response transcription factor	isoform_6400/1.9e-32/Auxin response factor	biological_process:GO:0006355//regulation of transcription, DNA-templated;GO:0009734//auxin-activated signaling pathway;cellular_component:GO:0005634//nucleus;molecular_function:GO:0003677//DNA binding;
isoform_6454	morphological adaption, signaling transduction (hormone signaling)	264	Sap-miR160a-5p, Sap-miR160b	K14486, ARF	auxin response factor; transcription factor	jcu:105638003/3.5e-76/auxin response factor 19 isoform X1; K14486 auxin response factor	0.129	PKI51963.1/2.2e-292/hypothetical protein CRG98_027615 [Punica granatum]	XM_009398698.2/0.0/XM_009398698.2 PREDICTED: Musa acuminata subsp. malaccensis auxin response factor 18-like (LOC103981930), mRNA	sp|Q653H7|ARFR_ORYSJ/2.8e-180/Auxin response factor 18 OS=Oryza sativa subsp. japonica OX=39947 GN=ARF18 PE=2 SV=1	At2g28350/2.7e-178/[TK] LSE0284 A Auxin response transcription factor	isoform_6454/4e-31/Auxin response factor	biological_process:GO:0006355//regulation of transcription, DNA-templated;GO:0009734//auxin-activated signaling pathway;cellular_component:GO:0005634//nucleus;molecular_function:GO:0003677//DNA binding;
isoform_6749	morphological adaption, signaling transduction (hormone signaling)	265	Sap-miR160b	K14486, ARF	auxin response factor; transcription factor	var:108338397/7.1e-74/auxin response factor 5; K14486 auxin response factor	0.386	OWM68902.1/2.8e-292/hypothetical protein CDL15_Pgr025089 [Punica granatum]	XM_018826660.1/0.0/XM_018826660.1 PREDICTED: Musa acuminata subsp. malaccensis auxin response factor 18-like (LOC103983875), transcript variant X7, mRNA	sp|Q9SKN5|ARFJ_ARATH/1.2e-193/Auxin response factor 10 OS=Arabidopsis thaliana OX=3702 GN=ARF10 PE=2 SV=1	At2g28350/2.8e-193/[TK] LSE0284 A Auxin response transcription factor	isoform_6749/1.9e-32/Auxin response factor	biological_process:GO:0006355//regulation of transcription, DNA-templated;GO:0009734//auxin-activated signaling pathway;cellular_component:GO:0005634//nucleus;molecular_function:GO:0003677//DNA binding;
isoform_68513		266	Sap-miR164a, Sap-miR164b, Sap-miR164e	CDL15	hypothetical protein	NA	0.193	OWM65283.1/1.9e-64/hypothetical protein CDL15_Pgr008873 [Punica granatum]	NA	sp|Q9FLR3|NAC79_ARATH/3.1e-32/NAC domain-containing protein 79 OS=Arabidopsis thaliana OX=3702 GN=NAC079 PE=2 SV=1	At5g07680/7.2e-32/[S] LSE0117 A No apical meristem (NAM) developmental protein and related proteins	NA	biological_process:GO:0006355//regulation of transcription, DNA-templated;cellular_component:GO:0005634//nucleus;molecular_function:GO:0003677//DNA binding;
isoform_6859	morphological adaption, signaling transduction (hormone signaling)	267	Sap-miR160b	K14486, ARF	auxin response factor; transcription factor	var:108338397/7.1e-74/auxin response factor 5; K14486 auxin response factor	0.193	OWM68902.1/1.3e-305/hypothetical protein CDL15_Pgr025089 [Punica granatum]	XM_018826660.1/0.0/XM_018826660.1 PREDICTED: Musa acuminata subsp. malaccensis auxin response factor 18-like (LOC103983875), transcript variant X7, mRNA	sp|Q9SKN5|ARFJ_ARATH/1.6e-201/Auxin response factor 10 OS=Arabidopsis thaliana OX=3702 GN=ARF10 PE=2 SV=1	At2g28350/3.7e-201/[TK] LSE0284 A Auxin response transcription factor	isoform_6859/1.9e-32/Auxin response factor	biological_process:GO:0006355//regulation of transcription, DNA-templated;GO:0009734//auxin-activated signaling pathway;cellular_component:GO:0005634//nucleus;molecular_function:GO:0003677//DNA binding;
isoform_70379		268	Sap-miR164b, Sap-miR164e	CDL15	hypothetical protein	NA	0.129	OWM65283.1/6.3e-60/hypothetical protein CDL15_Pgr008873 [Punica granatum]	NA	sp|Q9FLR3|NAC79_ARATH/8.4e-30/NAC domain-containing protein 79 OS=Arabidopsis thaliana OX=3702 GN=NAC079 PE=2 SV=1	At5g07680/1.9e-29/[S] LSE0117 A No apical meristem (NAM) developmental protein and related proteins	NA	biological_process:GO:0006355//regulation of transcription, DNA-templated;cellular_component:GO:0005634//nucleus;molecular_function:GO:0003677//DNA binding;
isoform_72488		269	Sap-miR8051-5p	NA	NA	NA	0.129	NA	KX852427.1/0.0/KX852427.1 Lagerstroemia intermedia chloroplast, complete genome	NA	NA	NA	NA
isoform_75756		270	Sap-miR169b-5p, Sap-miR169d-5p, Sap-miR169e	NA	NA	NA	0.129	NA	NA	NA	NA	NA	NA
isoform_76997		271	Sap-miR169r-3p	NA	NA	NA	0.451	NA	NA	NA	NA	NA	NA
isoform_7720	signaling transduction (hormone signaling)	272	Sap-miR396a-3p_4, Sap-miR396b-3p	OVM, ANT	AP2-like factor, ANT lineage; transcription factor	mesc:110614886/7.9e-171/AP2-like ethylene-responsive transcription factor ANT; K09285 AP2-like factor, ANT lineage	0.193	OWM80625.1/5.7e-266/hypothetical protein CDL15_Pgr006655 [Punica granatum]	XM_022033137.1/0.0/XM_022033137.1 PREDICTED: Carica papaya AP2-like ethylene-responsive transcription factor ANT (LOC110807855), mRNA	sp|Q38914|ANT_ARATH/1.8e-128/AP2-like ethylene-responsive transcription factor ANT OS=Arabidopsis thaliana OX=3702 GN=ANT PE=1 SV=2	At4g37750/4.1e-128/[K] LSE0337 A Ovule development protein/AP2 domain transcription factor	isoform_7720/9e-24/AP2 domain	cellular_component:GO:0005634//nucleus;molecular_function:GO:0003677//DNA binding;GO:0003700//DNA-binding transcription factor activity;
isoform_77358	signaling transduction (hormone signaling)	273	Sap-miR172a_3, Sap-miR172d, Sap-miR172e-3p	AP2	AP2-like factor, euAP2 lineage; transcription factor	cmo:103486446/5.8e-10/floral homeotic protein APETALA 2-like; K09284 AP2-like factor, euAP2 lineage	0.129	PKI43284.1/1.4e-60/hypothetical protein CRG98_036370 [Punica granatum]	NA	NA	NA	NA	biological_process:GO:0010228//vegetative to reproductive phase transition of meristem;cellular_component:GO:0005634//nucleus;molecular_function:GO:0003677//DNA binding;GO:0003700//DNA-binding transcription factor activity;
isoform_78267		274	Sap-miR172b_2	Pop1-86K15	Populus trichocarpa clone	NA	0.129	NA	AC182714.2/0.0/AC182714.2 Populus trichocarpa clone Pop1-86K15, complete sequence	NA	NA	NA	NA
isoform_78529		275	Sap-miR169r-3p	NA	NA	NA	0.129	NA	NA	NA	NA	NA	NA
isoform_82750		276	Sap-miR169r-3p	NA	NA	NA	0.258	NA	NA	NA	NA	isoform_82750/0.049/Cell cycle regulatory protein	NA
isoform_8479	protein turnover, morphological adaption, signaling transduction (hormone signaling)	277	Sap-miR393h	TIR1	transport inhibitor response 1	zju:107426075/1.4e-98/protein TRANSPORT INHIBITOR RESPONSE 1; K14485 transport inhibitor response 1	0.129	OWM87201.1/7.4e-101/hypothetical protein CDL15_Pgr010233 [Punica granatum] >PKI70520.1 hypothetical protein CRG98_009025 [Punica granatum]	AK287367.1/0.0/AK287367.1 Glycine max cDNA, clone: GMFL01-51-J22	sp|Q570C0|TIR1_ARATH/3.1e-85/Protein TRANSPORT INHIBITOR RESPONSE 1 OS=Arabidopsis thaliana OX=3702 GN=TIR1 PE=1 SV=2	At3g62980/7.2e-85/[R] KOG1947 Leucine rich repeat proteins, some proteins contain F-box	NA	biological_process:GO:0016036//cellular response to phosphate starvation;GO:0010311//lateral root formation;GO:0048443//stamen development;GO:0010152//pollen maturation;cellular_component:GO:0019005//SCF ubiquitin ligase complex;molecular_function:GO:0010011//auxin binding;GO:0000822//inositol hexakisphosphate binding;GO:0038198//auxin receptor activity;
isoform_8522	protein turnover, morphological adaption, signaling transduction (hormone signaling)	278	Sap-miR393h	TIR1	transport inhibitor response 1	zju:107426075/7.0e-278/protein TRANSPORT INHIBITOR RESPONSE 1; K14485 transport inhibitor response 1	6.569	OWM87201.1/1.2e-289/hypothetical protein CDL15_Pgr010233 [Punica granatum] >PKI70520.1 hypothetical protein CRG98_009025 [Punica granatum]	KJ787017.1/0.0/KJ787017.1 Morus alba var. multicaulis transport inhibitor response 1 (TIR1) mRNA, complete cds	sp|Q570C0|TIR1_ARATH/1.4e-271/Protein TRANSPORT INHIBITOR RESPONSE 1 OS=Arabidopsis thaliana OX=3702 GN=TIR1 PE=1 SV=2	At3g62980/3.1e-271/[R] KOG1947 Leucine rich repeat proteins, some proteins contain F-box	isoform_8522/7e-08/F-box-like	biological_process:GO:0031146//SCF-dependent proteasomal ubiquitin-dependent protein catabolic process;GO:0016567//protein ubiquitination;cellular_component:GO:0019005//SCF ubiquitin ligase complex;
isoform_85464		279	Sap-miR169r-3p	NA	NA	NA	0.258	NA	NA	NA	NA	NA	NA
isoform_8654	protein turnover, morphological adaption, signaling transduction (hormone signaling)	280	Sap-miR393a, Sap-miR393h	TIR1	transport inhibitor response 1	zju:107426075/6.8e-278/protein TRANSPORT INHIBITOR RESPONSE 1; K14485 transport inhibitor response 1	3.542	OWM87201.1/1.1e-289/hypothetical protein CDL15_Pgr010233 [Punica granatum] >PKI70520.1 hypothetical protein CRG98_009025 [Punica granatum]	KJ787017.1/0.0/KJ787017.1 Morus alba var. multicaulis transport inhibitor response 1 (TIR1) mRNA, complete cds	sp|Q570C0|TIR1_ARATH/1.3e-271/Protein TRANSPORT INHIBITOR RESPONSE 1 OS=Arabidopsis thaliana OX=3702 GN=TIR1 PE=1 SV=2	At3g62980/3.1e-271/[R] KOG1947 Leucine rich repeat proteins, some proteins contain F-box	isoform_8654/7e-08/F-box-like	biological_process:GO:0031146//SCF-dependent proteasomal ubiquitin-dependent protein catabolic process;GO:0016567//protein ubiquitination;cellular_component:GO:0019005//SCF ubiquitin ligase complex;
isoform_87116		281	Sap-miR172d	CRG98	hypothetical protein	NA	0.258	PKI43284.1/7.3e-19/hypothetical protein CRG98_036370 [Punica granatum]	NA	NA	NA	NA	cellular_component:GO:0005634//nucleus;molecular_function:GO:0003677//DNA binding;GO:0003700//DNA-binding transcription factor activity;
isoform_87481		282	Sap-miR396h	NA	NA	NA	0.58	NA	NA	NA	NA	NA	NA
isoform_876		283	Sap-miR169a-3p	EHMT	[histone H3]-lysine9 N-trimethyltransferase EHMT	crb:17888990/5.9e-101/histone-lysine N-methyltransferase, H3 lysine-9 specific SUVH6; K11420 euchromatic histone-lysine N-methyltransferase [EC:2.1.1.43]	0.129	XP_006293363.1/4.4e-100/histone-lysine N-methyltransferase, H3 lysine-9 specific SUVH6 [Capsella rubella] >EOA26261.1 hypothetical protein CARUB_v10022678mg [Capsella rubella]	XM_021435857.1/0.0/XM_021435857.1 PREDICTED: Herrania umbratica histone-lysine N-methyltransferase, H3 lysine-9 specific SUVH6 (LOC110422080), mRNA	sp|O82175|SUVH5_ARATH/3.6e-72/Histone-lysine N-methyltransferase, H3 lysine-9 specific SUVH5 OS=Arabidopsis thaliana OX=3702 GN=SUVH5 PE=1 SV=1	At2g35160_1/5.1e-61/[K] TWOG0108 CCAAT binding protein	isoform_876/2.3e-34/SAD/SRA domain	cellular_component:GO:0005634//nucleus;GO:0005694//chromosome;molecular_function:GO:0008270//zinc ion binding;GO:0018024//histone-lysine N-methyltransferase activity;
isoform_87822		284	Sap-miR394a_1, Sap-miR394a_2	CDL15	hypothetical protein	NA	0.129	OWM76213.1/6.9e-22/hypothetical protein CDL15_Pgr009859 [Punica granatum] >PKI76994.1 hypothetical protein CRG98_002497 [Punica granatum]	XM_010250731.2/0.0/XM_010250731.2 PREDICTED: Nelumbo nucifera F-box only protein 6-like (LOC104591738), mRNA	sp|Q9FZK1|FBX6_ARATH/2.5e-18/F-box only protein 6 OS=Arabidopsis thaliana OX=3702 GN=FBX6 PE=2 SV=1	At1g27340/5.8e-18/[R] LSE0005 A F-box domain	NA	NA
isoform_8815	protein turnover, morphological adaption, signaling transduction (hormone signaling)	285	Sap-miR393a, Sap-miR393h	TIR1	transport inhibitor response 1	vvi:100233127/1.8e-135/TIR1; protein TRANSPORT INHIBITOR RESPONSE 1; K14485 transport inhibitor response 1	0.193	OWM87201.1/1.1e-141/hypothetical protein CDL15_Pgr010233 [Punica granatum] >PKI70520.1 hypothetical protein CRG98_009025 [Punica granatum]	AK287367.1/0.0/AK287367.1 Glycine max cDNA, clone: GMFL01-51-J22	sp|Q570C0|TIR1_ARATH/8.8e-133/Protein TRANSPORT INHIBITOR RESPONSE 1 OS=Arabidopsis thaliana OX=3702 GN=TIR1 PE=1 SV=2	At3g62980/2.0e-132/[R] KOG1947 Leucine rich repeat proteins, some proteins contain F-box	isoform_8815/0.00057/Leucine Rich repeats (2 copies)	biological_process:GO:0031146//SCF-dependent proteasomal ubiquitin-dependent protein catabolic process;GO:0016567//protein ubiquitination;cellular_component:GO:0019005//SCF ubiquitin ligase complex;
isoform_88306		286	Sap-miR172d	NA	NA	NA	0.258	NA	NA	NA	NA	NA	NA
isoform_90124		287	Sap-miR172b_1	APETALA2	Camellia sinensis transcription factor	NA	0.129	NA	JQ398741.1/0.0/JQ398741.1 Camellia sinensis transcription factor APETALA2 mRNA, complete cds	NA	NA	NA	NA
isoform_9055	protein turnover, morphological adaption, signaling transduction (hormone signaling)	288	Sap-miR393a, Sap-miR393h	TIR1	transport inhibitor response 1	zju:107426075/9.7e-251/protein TRANSPORT INHIBITOR RESPONSE 1; K14485 transport inhibitor response 1	0.129	OWM87201.1/4.9e-259/hypothetical protein CDL15_Pgr010233 [Punica granatum] >PKI70520.1 hypothetical protein CRG98_009025 [Punica granatum]	KJ787017.1/0.0/KJ787017.1 Morus alba var. multicaulis transport inhibitor response 1 (TIR1) mRNA, complete cds	sp|Q570C0|TIR1_ARATH/4.5e-246/Protein TRANSPORT INHIBITOR RESPONSE 1 OS=Arabidopsis thaliana OX=3702 GN=TIR1 PE=1 SV=2	At3g62980/1.0e-245/[R] KOG1947 Leucine rich repeat proteins, some proteins contain F-box	isoform_9055/5.5e-08/F-box-like	biological_process:GO:0031146//SCF-dependent proteasomal ubiquitin-dependent protein catabolic process;GO:0016567//protein ubiquitination;cellular_component:GO:0019005//SCF ubiquitin ligase complex;
isoform_91416		289	Sap-miR4995	rbcL, cbbL	ribulose-bisphosphate carboxylase large chain	bdi:112271745/8.9e-10/uncharacterized protein LOC112271745; K01601 ribulose-bisphosphate carboxylase large chain [EC:4.1.1.39]	0.386	PPR91549.1/2.0e-26/hypothetical protein GOBAR_AA29149 [Gossypium barbadense]	MF362689.1/0.0/MF362689.1 Ambrosia artemisiifolia chloroplast, complete genome	NA	NA	NA	cellular_component:GO:0016021//integral component of membrane;molecular_function:GO:0046873//metal ion transmembrane transporter activity;
isoform_91565		290	Sap-miR396h	NA	uncharacterized LOC18612609 (LOC18612609), transcript variant X3, ncRNA	NA	0.193	NA	NA	NA	NA	NA	NA
isoform_9371	signaling transduction (hormone signaling)	291	Sap-miR171, Sap-miR171a-3p, Sap-miR171b	DELLA	DELLA protein	vvi:100232937/2.7e-27/VVGAI1; DELLA protein GAI1; K14494 DELLA protein	0.193	OWM66361.1/2.1e-254/hypothetical protein CDL15_Pgr013578 [Punica granatum]	CP023129.1/0.0/CP023129.1 Lupinus angustiflorus cultivar Tanjil chromosome LG-17	sp|O23210|SCL15_ARATH/1.2e-121/Scarecrow-like protein 15 OS=Arabidopsis thaliana OX=3702 GN=SCL15 PE=1 SV=3	At4g36710/1.3e-120/[TK] LSE0487 A Gibberellin response modulator/Predicted transcription factor	isoform_9371/1.7e-86/GRAS domain family	biological_process:GO:0048831//regulation of shoot system development;GO:0030154//cell differentiation;
isoform_9742	signaling transduction (hormone signaling)	292	Sap-miR172b_1	AP2	AP2-like factor, euAP2 lineage; transcription factor	vvi:100268051/1.1e-142/AP2; transcription factor APETALA2; K09284 AP2-like factor, euAP2 lineage	0.129	PKI33364.1/4.1e-157/hypothetical protein CRG98_046230 [Punica granatum]	XM_010532951.2/0.0/XM_010532951.2 PREDICTED: Tarenaya hassleriana floral homeotic protein APETALA 2-like (LOC104807594), mRNA	sp|P47927|AP2_ARATH/3.3e-100/Floral homeotic protein APETALA 2 OS=Arabidopsis thaliana OX=3702 GN=AP2 PE=1 SV=1	At4g36920/7.6e-100/[K] LSE0337 A Ovule development protein/AP2 domain transcription factor	isoform_9742/2.6e-17/AP2 domain	cellular_component:GO:0005634//nucleus;molecular_function:GO:0003677//DNA binding;GO:0003700//DNA-binding transcription factor activity;
isoform_9762	protein turnover, morphological adaption, signaling transduction (hormone signaling)	293	Sap-miR393-5p, Sap-miR393a, Sap-miR393h	TIR1	transport inhibitor response 1	zju:107426075/7.1e-278/protein TRANSPORT INHIBITOR RESPONSE 1; K14485 transport inhibitor response 1	0.644	OWM87201.1/1.2e-289/hypothetical protein CDL15_Pgr010233 [Punica granatum] >PKI70520.1 hypothetical protein CRG98_009025 [Punica granatum]	KJ787017.1/0.0/KJ787017.1 Morus alba var. multicaulis transport inhibitor response 1 (TIR1) mRNA, complete cds	sp|Q570C0|TIR1_ARATH/1.4e-271/Protein TRANSPORT INHIBITOR RESPONSE 1 OS=Arabidopsis thaliana OX=3702 GN=TIR1 PE=1 SV=2	At3g62980/3.2e-271/[R] KOG1947 Leucine rich repeat proteins, some proteins contain F-box	isoform_9762/7e-08/F-box-like	biological_process:GO:0031146//SCF-dependent proteasomal ubiquitin-dependent protein catabolic process;GO:0016567//protein ubiquitination;cellular_component:GO:0019005//SCF ubiquitin ligase complex;
isoform_9798	signaling transduction (hormone signaling)	294	Sap-miR172a_2, Sap-miR172b_1, Sap-miR172g-3p	AP2	AP2-like factor, euAP2 lineage; transcription factor	vvi:100268051/1.5e-110/AP2; transcription factor APETALA2; K09284 AP2-like factor, euAP2 lineage	0.129	PKI33364.1/9.2e-125/hypothetical protein CRG98_046230 [Punica granatum]	XM_010532951.2/0.0/XM_010532951.2 PREDICTED: Tarenaya hassleriana floral homeotic protein APETALA 2-like (LOC104807594), mRNA	sp|P47927|AP2_ARATH/1.7e-80/Floral homeotic protein APETALA 2 OS=Arabidopsis thaliana OX=3702 GN=AP2 PE=1 SV=1	At4g36920/3.9e-80/[K] LSE0337 A Ovule development protein/AP2 domain transcription factor	isoform_9798/1.1e-15/AP2 domain	cellular_component:GO:0005634//nucleus;molecular_function:GO:0003677//DNA binding;GO:0003700//DNA-binding transcription factor activity;
isoform_9881	protein turnover, morphological adaption, signaling transduction (hormone signaling)	295	Sap-miR393-5p	TIR1	transport inhibitor response 1	egr:104441079/5.1e-281/protein TRANSPORT INHIBITOR RESPONSE 1; K14485 transport inhibitor response 1	1.224	OWM77537.1/2.6e-305/hypothetical protein CDL15_Pgr016935 [Punica granatum] >PKI74763.1 hypothetical protein CRG98_004872 [Punica granatum]	XM_010268960.2/0.0/XM_010268960.2 PREDICTED: Nelumbo nucifera aquaporin TIP1-1 (LOC104604560), mRNA	sp|Q570C0|TIR1_ARATH/9.9e-190/Protein TRANSPORT INHIBITOR RESPONSE 1 OS=Arabidopsis thaliana OX=3702 GN=TIR1 PE=1 SV=2	At3g62980/2.3e-189/[R] KOG1947 Leucine rich repeat proteins, some proteins contain F-box	isoform_9881/4.9e-08/Leucine Rich repeats (2 copies)	biological_process:GO:0031146//SCF-dependent proteasomal ubiquitin-dependent protein catabolic process;GO:0016567//protein ubiquitination;cellular_component:GO:0019005//SCF ubiquitin ligase complex;
isoform_98977	signaling transduction (hormone signaling)	296	Sap-miR166, Sap-miR166c, Sap-miR166e, Sap-miR166h-3p, Sap-miR166m	HD-ZIP	homeobox-leucine zipper protein; transcription factor	egr:104449909/4.9e-94/homeobox-leucine zipper protein ATHB-15; K09338 homeobox-leucine zipper protein	0.064	OWM78111.1/5.9e-96/hypothetical protein CDL15_Pgr014930 [Punica granatum]	XM_010064216.2/0.0/XM_010064216.2 PREDICTED: Eucalyptus grandis homeobox-leucine zipper protein ATHB-15 (LOC104449909), mRNA	sp|Q9ZU11|ATB15_ARATH/7.4e-88/Homeobox-leucine zipper protein ATHB-15 OS=Arabidopsis thaliana OX=3702 GN=ATHB-15 PE=1 SV=1	At1g52150/1.7e-87/[K] LSE0187 A Homeodomain protein, contains START domain	isoform_98977/4.7e-05/START domain	cellular_component:GO:0005634//nucleus;molecular_function:GO:0008289//lipid binding;GO:0003677//DNA binding;
isoform_99067		297	Sap-miR535a	NA	NA	NA	0.064	NA	XR_001927389.1/0.0/XR_001927389.1 PREDICTED: Theobroma cacao uncharacterized LOC18612609 (LOC18612609), transcript variant X3, ncRNA	NA	NA	NA	NA
isoform_9924	signaling transduction (hormone signaling)	298	Sap-miR172b_1, Sap-miR172e-3p, Sap-miR172g-3p	AP2	AP2-like factor, euAP2 lineage; transcription factor	oeu:111366901/3.8e-45/floral homeotic protein APETALA 2-like; K09284 AP2-like factor, euAP2 lineage	0.129	XP_022843350.1/2.8e-44/floral homeotic protein APETALA 2-like [Olea europaea var. sylvestris]	XM_020415130.1/0.0/XM_020415130.1 PREDICTED: Asparagus officinalis floral homeotic protein APETALA 2-like (LOC109845875), mRNA	sp|B8AVJ9|APL25_ORYSI/1.9e-39/APETALA2-like protein 5 OS=Oryza sativa subsp. indica OX=39946 GN=AP2-5 PE=2 SV=1	At4g36920/5.8e-39/[K] LSE0337 A Ovule development protein/AP2 domain transcription factor	isoform_9924/5.8e-10/AP2 domain	cellular_component:GO:0005634//nucleus;molecular_function:GO:0003677//DNA binding;GO:0003700//DNA-binding transcription factor activity;
isoform_99420	signaling transduction (hormone signaling)	299	Sap-miR172a_2, Sap-miR172b_1, Sap-miR172c-3p, Sap-miR172e-3p, Sap-miR172g-3p	AP2	AP2-like factor, euAP2 lineage; transcription factor	tcc:18611171/2.6e-146/floral homeotic protein APETALA 2; K09284 AP2-like factor, euAP2 lineage	0.064	PKI33364.1/1.3e-159/hypothetical protein CRG98_046230 [Punica granatum]	XM_017779172.1/0.0/XM_017779172.1 PREDICTED: Gossypium arboreum floral homeotic protein APETALA 2-like (LOC108476820), transcript variant X5, mRNA	sp|P47927|AP2_ARATH/4.7e-114/Floral homeotic protein APETALA 2 OS=Arabidopsis thaliana OX=3702 GN=AP2 PE=1 SV=1	At4g36920/1.1e-113/[K] LSE0337 A Ovule development protein/AP2 domain transcription factor	isoform_99420/5.2e-19/AP2 domain	cellular_component:GO:0005634//nucleus;molecular_function:GO:0003677//DNA binding;GO:0003700//DNA-binding transcription factor activity;
isoform_99948		300	Sap-miR172g-3p	CYB561	transmembrane ascorbate-dependent reductase	pop:7484383/5.7e-17/uncharacterized protein LOC7484383 isoform X1; K08360 cytochrome b-561 [EC:7.2.1.3]	0.064	OWM64231.1/3.3e-53/hypothetical protein CDL15_Pgr018803 [Punica granatum] >PKI39973.1 hypothetical protein CRG98_039636 [Punica granatum]	XM_018972862.1/0.0/XM_018972862.1 PREDICTED: Juglans regia remorin-like (LOC108996832), transcript variant X2, mRNA	sp|Q9M2D8|Y3126_ARATH/8.1e-46/Uncharacterized protein At3g61260 OS=Arabidopsis thaliana OX=3702 GN=At3g61260 PE=1 SV=1	NA	isoform_99948/4.8e-31/Remorin, C-terminal region	NA

## Sheet: Data S6
Reference miRNA	Comparable miRNA	Species	Target Gene ID	Target Gene Name	Target Gene Describtion	Reference
bna-miR156a	Sap-miR156a	Sonneratia apetala Buch-Ham.	isoform_12132	BRI1	protein brassinosteroid insensitive 1
bna-miR156a	Sap-miR156a	Sonneratia apetala Buch-Ham.	isoform_103749	BRI1	protein brassinosteroid insensitive 1
bna-miR156a	Sap-miR156a	Sonneratia apetala Buch-Ham.	isoform_104696	BRI1	protein brassinosteroid insensitive 1
bna-miR156a	Sap-miR156a	Sonneratia apetala Buch-Ham.	isoform_116599	CDL15	hypothetical protein
bna-miR156a	Sap-miR156a	Sonneratia apetala Buch-Ham.	isoform_123539	CRG98	malaccensis squamosa promoter-binding-like protein 3
bna-miR156a	Sap-miR156a	Sonneratia apetala Buch-Ham.	isoform_126103	CDL15	hypothetical protein
bna-miR156a	Sap-miR156a	Sonneratia apetala Buch-Ham.	isoform_126933	BRI1	protein brassinosteroid insensitive 1
bna-miR156a	Sap-miR156a	Sonneratia apetala Buch-Ham.	isoform_137211	BRI1	protein brassinosteroid insensitive 1
bna-miR156a	Sap-miR156a	Sonneratia apetala Buch-Ham.	isoform_140631	BRI1	protein brassinosteroid insensitive 1
bna-miR156a	Sap-miR156a	Sonneratia apetala Buch-Ham.	isoform_141673	BRI1	protein brassinosteroid insensitive 1
bna-miR156a	bna-miR156a	Gossypium hirsutum Linn.	comp97808_c0	NA	Promoter binding protein	Peng et al., 2014
bna-miR156a	bna-miR156a	Gossypium hirsutum Linn.	comp106239_c0	NSI	Probable acetyltransferase NSI	Peng et al., 2014
bna-miR156a	bna-miR156a	Gossypium hirsutum Linn.	comp111833_c0	SBP	SBP domain	Peng et al., 2014
bna-miR156a	bna-miR156a	Gossypium hirsutum Linn.	comp92871_c0	SBP1	Squamosa promoter-binding protein	Peng et al., 2014
bna-miR156a	bna-miR156a	Gossypium hirsutum Linn.	comp94150_c0	SPL5	Squamosa promoter-binding-like protein	Peng et al., 2014
osa-miR164e	Sap-miR164e	Sonneratia apetala Buch-Ham.	isoform_32927	UBR4, ZUBR1	E3 ubiquitin-protein ligase UBR4
osa-miR164e	Sap-miR164e	Sonneratia apetala Buch-Ham.	isoform_39543	GAE, cap1J	UDP-glucuronate 4-epimerase
osa-miR164e	Sap-miR164e	Sonneratia apetala Buch-Ham.	isoform_40730	UBR4, ZUBR1	E3 ubiquitin-protein ligase UBR4
osa-miR164e	Sap-miR164e	Sonneratia apetala Buch-Ham.	isoform_43362	UXS1, uxs	UDP-glucuronate decarboxylase
osa-miR164e	Sap-miR164e	Sonneratia apetala Buch-Ham.	isoform_44057	UBR4, ZUBR1	E3 ubiquitin-protein ligase UBR4
osa-miR164e	Sap-miR164e	Sonneratia apetala Buch-Ham.	isoform_68513	CDL15	hypothetical protein
osa-miR164e	Sap-miR164e	Sonneratia apetala Buch-Ham.	isoform_70379	CDL15	hypothetical protein
osa-miR164e	Sap-miR164e	Sonneratia apetala Buch-Ham.	isoform_247705	SKP2, FBXL1	F-box and leucine-rich repeat protein 1 (S-phase kinase-associated protein 2)
osa-miR164e	osa-miR164e	Oryza sativa L.	LOC_Os04g33830	NA	membrane protein, putative, expressed	Goswami et al., 2017
cme-miR166h, ptc-miR166b	Sap-miR166a-3p	Sonneratia apetala Buch-Ham.	isoform_1593	HD-ZIP	homeobox-leucine zipper protein
cme-miR166h, ptc-miR166b	Sap-miR166a-3p	Sonneratia apetala Buch-Ham.	isoform_1647	HD-ZIP	homeobox-leucine zipper protein
cme-miR166h, ptc-miR166b	Sap-miR166a-3p	Sonneratia apetala Buch-Ham.	isoform_3353	HD-ZIP	homeobox-leucine zipper protein
cme-miR166h, ptc-miR166b	Sap-miR166a-3p	Sonneratia apetala Buch-Ham.	isoform_3838	HD-ZIP	homeobox-leucine zipper protein
cme-miR166h, ptc-miR166b	Sap-miR166a-3p	Sonneratia apetala Buch-Ham.	isoform_4214	HD-ZIP	homeobox-leucine zipper protein
cme-miR166h, ptc-miR166b	Sap-miR166a-3p	Sonneratia apetala Buch-Ham.	isoform_109978	HD-ZIP	homeobox-leucine zipper protein
cme-miR166h, ptc-miR166b	Sap-miR166a-3p	Sonneratia apetala Buch-Ham.	isoform_129679	HD-ZIP	homeobox-leucine zipper protein
cme-miR166h, ptc-miR166b	Sap-miR166a-3p	Sonneratia apetala Buch-Ham.	isoform_139360	HD-ZIP	homeobox-leucine zipper protein
ptc-miR166b	ptc-miR166b--MIMAT0001925	Populus euphratica Oliv.	POPTR_0001s18930	ATHB-15	Homeobox-leucine zipper family protein / lipid-binding START domain-containing protein	Li et al., 2013
ptc-miR166b	ptc-miR166b--MIMAT0001925	Populus euphratica Oliv.	POPTR_0003s04860	ATHB-15	Homeobox-leucine zipper family protein / lipid-binding START domain-containing protein
osa-miR166d-5p	Sap-miR166d-5p	Sonneratia apetala Buch-Ham.	isoform_18838	K22395	cinnamyl-alcohol dehydrogenase
[truncated: 193 more rows]

## Sheet: Data S7 
Sample	Total Raw Reads (M)	Total Clean Reads (M)	Total Clean Bases(Gb)	Clean Reads Q20(%)	Clean Reads Q30(%)	Clean Reads Ratio(%)
[truncated: 10 more rows]

[truncated: 5 more sheets: Data S8, Data S9, Data S10, Data S11, Data S12]
